# Supplementary material for: Revealing heterogeneity and damage response in the adult human utricle
Source: Research Square preprint supplement (doi:10.21203/rs.3.rs-3649756/v1), 2024-03-11
Supplement: Supplementary file 1 [file 122d8b5e70f5304abb0bc950.xlsx]

## Sheet: Table S6. Control Top 50 genes
Table S6. Top 50 DEGs from a control utricle (scCtrl-1). Wilcoxon rank-sum test, with a Bonferroni Padj < .05. Related to Figure 7.
Colours are matched to Figure 7a and 7b cluster colours. Transcription factors (TF) were detected using AnimalTFDB 3.0, druggable targets using DGIdb 4.0.
Gene	TF	p_val	avg_log2FC	pct.1	pct.2	p_val_adj	Cluster	Drug
TAC1	non-TF	3.38975e-92	4.94891	0.645	0.072	5.11784e-88	TypeI-HC	TRUE
CGA	non-TF	0.000106445	4.26421	0.127	0.048	1	TypeI-HC	TRUE
SELENOK	non-TF	3.44729e-47	3.43458	0.9	0.527	5.20472e-43	TypeI-HC
PPP1R27	non-TF	2.97355e-124	2.96615	0.518	0.022	4.48947e-120	TypeI-HC
CHGB	non-TF	1.85131e-80	2.89292	0.464	0.036	2.79511e-76	TypeI-HC
CIB3	non-TF	1.4022e-34	2.8837	0.482	0.111	2.11704e-30	TypeI-HC
PCP4	non-TF	1.16281e-95	2.85252	0.536	0.041	1.75561e-91	TypeI-HC
SYT14	non-TF	5.59686e-57	2.84032	0.673	0.144	8.45014e-53	TypeI-HC
FRMD4B	non-TF	4.25093e-60	2.74557	0.709	0.162	6.41805e-56	TypeI-HC
MLF1	non-TF	2.96286e-48	2.71767	0.645	0.159	4.47333e-44	TypeI-HC
BMP2	non-TF	4.1547e-83	2.68918	0.355	0.016	6.27276e-79	TypeI-HC	TRUE
CABP2	non-TF	2.77735e-67	2.61603	0.609	0.092	4.19325e-63	TypeI-HC
HSPA5	non-TF	8.2634e-11	2.57101	0.7	0.615	1.24761e-06	TypeI-HC	TRUE
HSP90B1	non-TF	1.0921e-22	2.5608	0.745	0.466	1.64885e-18	TypeI-HC	TRUE
GPX2	non-TF	2.18572e-31	2.47033	0.345	0.059	3.3e-27	TypeI-HC
NEFL	non-TF	1.13773e-46	2.44807	0.391	0.05	1.71775e-42	TypeI-HC
VSIG10L2	non-TF	5.51362e-94	2.43995	0.418	0.02	8.32446e-90	TypeI-HC
ADAM11	non-TF	9.46645e-79	2.42171	0.373	0.02	1.42924e-74	TypeI-HC
RBM24	non-TF	7.08702e-66	2.41745	0.482	0.053	1.07e-61	TypeI-HC
ID4	TF	3.09514e-13	2.38706	0.518	0.303	4.67304e-09	TypeI-HC
FAM183A	non-TF	2.16803e-44	2.35357	0.5	0.093	3.27329e-40	TypeI-HC
SCGB2A1	non-TF	1.20003e-41	2.35226	0.455	0.079	1.81181e-37	TypeI-HC
CALM1	non-TF	7.61995e-29	2.34054	0.8	0.523	1.15046e-24	TypeI-HC	TRUE
CETN2	non-TF	1.16825e-31	2.31117	0.555	0.168	1.76382e-27	TypeI-HC
EIF1	non-TF	1.30831e-48	2.31075	0.991	0.901	1.97528e-44	TypeI-HC
C11orf87	non-TF	1.16951e-62	2.30175	0.355	0.026	1.76572e-58	TypeI-HC
ICA1L	non-TF	2.13534e-46	2.29204	0.482	0.081	3.22393e-42	TypeI-HC
ABCA5	non-TF	6.52383e-26	2.27952	0.527	0.179	9.84968e-22	TypeI-HC	TRUE
DNER	non-TF	5.17797e-43	2.18132	0.509	0.099	7.81769e-39	TypeI-HC	TRUE
HOPX	TF	1.24578e-46	2.14087	0.409	0.054	1.88087e-42	TypeI-HC
BDNF	non-TF	3.1353e-58	2.10933	0.336	0.025	4.73368e-54	TypeI-HC	TRUE
GFI1	TF	3.73309e-38	2.01834	0.273	0.028	5.63623e-34	TypeI-HC
CPE	non-TF	8.59513e-31	2.01697	0.373	0.071	1.29769e-26	TypeI-HC
SMPX	non-TF	2.30111e-17	2.01482	0.464	0.187	3.47421e-13	TypeI-HC
SNCG	non-TF	1.58946e-47	2.00234	0.318	0.03	2.39977e-43	TypeI-HC
BEX1	non-TF	2.67414e-21	1.98435	0.318	0.073	4.03741e-17	TypeI-HC
TMX4	non-TF	1.33566e-23	1.96513	0.464	0.148	2.01658e-19	TypeI-HC
PDLIM3	non-TF	6.89225e-29	1.95202	0.355	0.068	1.04059e-24	TypeI-HC
POU4F3	TF	1.19148e-30	1.93569	0.382	0.073	1.7989e-26	TypeI-HC
CALM2	non-TF	1.47563e-33	1.92091	0.882	0.598	2.22791e-29	TypeI-HC
LBH	non-TF	2.80517e-15	1.9199	0.318	0.097	4.23525e-11	TypeI-HC
EIF1B	non-TF	7.59702e-20	1.91813	0.518	0.219	1.147e-15	TypeI-HC
XIRP2	non-TF	2.42703e-62	1.9101	0.291	0.015	3.66433e-58	TypeI-HC	TRUE
CDR1	non-TF	1.30276e-20	1.90488	0.264	0.05	1.96691e-16	TypeI-HC
ERO1B	non-TF	4.78478e-24	1.88879	0.282	0.05	7.22406e-20	TypeI-HC
MTPN	non-TF	1.10724e-23	1.88304	0.618	0.281	1.67171e-19	TypeI-HC
NIN	non-TF	9.44246e-26	1.865	0.4	0.097	1.42562e-21	TypeI-HC
OCM	non-TF	7.80182e-38	1.86353	0.2	0.013	1.17792e-33	TypeI-HC
IRX2	TF	7.29994e-30	1.84599	0.309	0.049	1.10214e-25	TypeI-HC
HIST1H1C	non-TF	5.61662e-08	1.81898	0.282	0.126	0.000847998	TypeI-HC
CXCL14	non-TF	7.41058e-77	3.25318	0.829	0.195	1.11885e-72	TypeII-HC
CALB1	non-TF	4.88644e-67	2.88401	0.464	0.056	7.37755e-63	TypeII-HC
DNAJB1	non-TF	7.00063e-20	2.07419	0.586	0.288	1.05695e-15	TypeII-HC	TRUE
JUND	TF	3.15565e-30	2.05928	0.779	0.445	4.76441e-26	TypeII-HC	TRUE
PEG10	non-TF	1.10061e-28	1.96422	0.393	0.094	1.6617e-24	TypeII-HC
OTOF	non-TF	5.12106e-82	1.88294	0.386	0.024	7.73177e-78	TypeII-HC
RSPH1	non-TF	4.03169e-50	1.82399	0.379	0.048	6.08705e-46	TypeII-HC
NPY	non-TF	4.46209e-14	1.82094	0.121	0.018	6.73687e-10	TypeII-HC	TRUE
HSPH1	non-TF	2.53074e-20	1.77648	0.471	0.178	3.82092e-16	TypeII-HC
SCG3	non-TF	1.28785e-72	1.67766	0.457	0.046	1.94439e-68	TypeII-HC
PKIA	non-TF	3.36058e-53	1.66962	0.3	0.025	5.0738e-49	TypeII-HC
C2CD4B	non-TF	1.70299e-49	1.65998	0.386	0.051	2.57118e-45	TypeII-HC
CCDC68	non-TF	1.43644e-36	1.65685	0.479	0.111	2.16873e-32	TypeII-HC
CD164L2	non-TF	7.79332e-45	1.54182	0.293	0.03	1.17664e-40	TypeII-HC
HSP90AA1	non-TF	2.49007e-31	1.51606	0.964	0.764	3.75951e-27	TypeII-HC	TRUE
DNAJC12	non-TF	1.33854e-31	1.49427	0.207	0.022	2.02093e-27	TypeII-HC
CIB2	non-TF	5.4215e-42	1.45924	0.379	0.059	8.18538e-38	TypeII-HC
SOX2	TF	5.44384e-16	1.4507	0.579	0.299	8.21911e-12	TypeII-HC
MSMO1	non-TF	1.68738e-25	1.43652	0.607	0.24	2.54761e-21	TypeII-HC
UBB	non-TF	6.13874e-22	1.41853	0.921	0.821	9.26827e-18	TypeII-HC
SHTN1	non-TF	6.16494e-23	1.38223	0.686	0.344	9.30783e-19	TypeII-HC
B3GNT10	non-TF	1.07362e-28	1.34274	0.257	0.039	1.62095e-24	TypeII-HC
MIR200CHG	non-TF	2.62739e-21	1.31164	0.357	0.1	3.96684e-17	TypeII-HC
TSC22D2	TF	2.36742e-25	1.30622	0.357	0.086	3.57433e-21	TypeII-HC
DNAJB9	non-TF	1.20721e-18	1.30573	0.279	0.07	1.82264e-14	TypeII-HC
ZNF131	TF	1.54041e-24	1.27523	0.364	0.09	2.32571e-20	TypeII-HC
CEP126	non-TF	4.62509e-16	1.26197	0.236	0.058	6.98295e-12	TypeII-HC
C2orf40	non-TF	1.455e-21	1.22411	0.236	0.044	2.19675e-17	TypeII-HC
C2orf80	non-TF	1.53602e-31	1.21992	0.2	0.02	2.31908e-27	TypeII-HC
FDFT1	non-TF	1.13302e-10	1.20423	0.421	0.216	1.71064e-06	TypeII-HC	TRUE
CIRBP	non-TF	1.17553e-21	1.19071	0.621	0.285	1.77482e-17	TypeII-HC
AKNAD1	non-TF	1.34768e-18	1.1673	0.207	0.039	2.03472e-14	TypeII-HC
HMGCS1	non-TF	5.34559e-12	1.16029	0.371	0.157	8.07078e-08	TypeII-HC	TRUE
FAM81B	non-TF	5.95529e-31	1.13796	0.286	0.044	8.9913e-27	TypeII-HC
AKAP9	non-TF	6.00498e-14	1.13107	0.557	0.297	9.06632e-10	TypeII-HC
FAM215B	non-TF	4.10315e-14	1.12438	0.321	0.112	6.19493e-10	TypeII-HC
TFDP2	TF	2.85335e-17	1.11078	0.329	0.099	4.30799e-13	TypeII-HC
PSD3	non-TF	4.2389e-19	1.08009	0.214	0.041	6.3999e-15	TypeII-HC
C11orf96	non-TF	1.42523e-19	1.57799	0.273	0.115	2.15181e-15	SC-1
TIMP1	non-TF	1.39329e-29	1.44007	0.925	0.844	2.10359e-25	SC-1
SLPI	non-TF	4.09723e-23	1.30548	0.785	0.656	6.186e-19	SC-1	TRUE
G0S2	non-TF	4.40897e-17	1.1691	0.215	0.081	6.65667e-13	SC-1
MT2A	non-TF	8.82785e-24	1.13891	0.712	0.532	1.33283e-19	SC-1	TRUE
MT1X	non-TF	7.0602e-12	1.10316	0.534	0.41	1.06595e-07	SC-1
PI3	non-TF	1.0768e-06	1.04821	0.238	0.151	0.0162575	SC-1	TRUE
BIRC3	non-TF	9.76549e-18	1.01109	0.66	0.494	1.47439e-13	SC-1	TRUE
LAMB3	non-TF	4.80301e-37	0.992668	0.814	0.577	7.25159e-33	SC-1	TRUE
ISG20	non-TF	7.79755e-28	0.949021	0.804	0.598	1.17727e-23	SC-1
CXCL2	non-TF	3.71503e-08	0.942323	0.265	0.162	0.000560896	SC-1	TRUE
TNFAIP6	non-TF	1.10501e-14	0.929518	0.2	0.079	1.66835e-10	SC-1
CTSL	non-TF	1.4952e-19	0.885845	0.422	0.228	2.25746e-15	SC-1	TRUE
IGFBP3	non-TF	5.58643e-22	0.873127	0.743	0.598	8.43439e-18	SC-1	TRUE
ITGA2	non-TF	5.72535e-23	0.856836	0.731	0.54	8.64414e-19	SC-1	TRUE
LCN2	non-TF	2.21853e-11	0.854593	0.833	0.819	3.34953e-07	SC-1
APC	non-TF	1.42153e-09	0.836651	0.382	0.259	2.14622e-05	SC-1	TRUE
SOD2	non-TF	2.15422e-29	0.822525	0.879	0.752	3.25243e-25	SC-1	TRUE
ANXA1	non-TF	1.23676e-23	0.808725	0.883	0.764	1.86727e-19	SC-1	TRUE
LIF	non-TF	8.47148e-14	0.796052	0.23	0.105	1.27902e-09	SC-1	TRUE
CDKN1A	non-TF	1.58928e-16	0.791303	0.284	0.133	2.39949e-12	SC-1	TRUE
SERPINB1	non-TF	2.90081e-25	0.788311	0.871	0.738	4.37964e-21	SC-1
TM4SF1	non-TF	2.99459e-10	0.7768	0.472	0.332	4.52123e-06	SC-1
LAMC2	non-TF	1.77114e-14	0.772403	0.491	0.321	2.67407e-10	SC-1	TRUE
ARID5B	TF	7.28459e-07	0.762443	0.301	0.2	0.0109983	SC-1	TRUE
NFKBIA	non-TF	4.71482e-19	0.761878	0.699	0.512	7.11843e-15	SC-1	TRUE
S100A16	non-TF	3.7885e-21	0.75933	0.624	0.422	5.71988e-17	SC-1
CHI3L1	non-TF	2.83256e-05	0.723726	0.294	0.212	0.427661	SC-1	TRUE
IFNGR1	non-TF	7.25e-18	0.723236	0.582	0.393	1.09461e-13	SC-1	TRUE
SPRR1B	non-TF	4.62166e-10	0.713209	0.603	0.474	6.97778e-06	SC-1
PMP22	non-TF	4.84757e-12	0.689334	0.317	0.179	7.31886e-08	SC-1	TRUE
TACSTD2	non-TF	0.00197817	0.688147	0.326	0.276	1	SC-1	TRUE
PLOD2	non-TF	2.52533e-12	0.67445	0.33	0.185	3.81274e-08	SC-1
SFN	non-TF	2.23289e-08	0.668383	0.322	0.215	0.000337121	SC-1	TRUE
NAMPT	non-TF	4.05197e-11	0.652633	0.328	0.192	6.11766e-07	SC-1	TRUE
KLF6	TF	6.27597e-07	0.644145	0.447	0.328	0.00947546	SC-1
PLIN2	non-TF	4.42506e-11	0.638272	0.39	0.246	6.68095e-07	SC-1
ANGPTL4	non-TF	3.88629e-05	0.630317	0.207	0.136	0.586752	SC-1
KCNK1	non-TF	1.58016e-12	0.609979	0.514	0.346	2.38573e-08	SC-1
ITGB1	non-TF	1.05218e-12	0.608371	0.411	0.261	1.58858e-08	SC-1	TRUE
TRIB1	non-TF	3.43205e-13	0.577858	0.468	0.3	5.18171e-09	SC-1
PLAUR	non-TF	1.92819e-10	0.574152	0.386	0.252	2.91118e-06	SC-1	TRUE
FOSL1	TF	1.45472e-09	0.558604	0.203	0.1	2.19633e-05	SC-1	TRUE
GADD45A	non-TF	8.22234e-06	0.558192	0.399	0.301	0.124141	SC-1	TRUE
CLCF1	non-TF	4.54548e-08	0.545552	0.144	0.067	0.000686277	SC-1
LRRFIP2	TF	9.81657e-10	0.539344	0.328	0.199	1.48211e-05	SC-1
INSIG2	non-TF	3.74284e-07	0.533626	0.236	0.144	0.00565093	SC-1	TRUE
FGFR1	non-TF	2.40918e-08	0.533466	0.38	0.261	0.000363739	SC-1	TRUE
PDZK1IP1	non-TF	2.24639e-09	0.532891	0.342	0.219	3.3916e-05	SC-1
IGFBP6	non-TF	1.27073e-08	0.520408	0.478	0.351	0.000191855	SC-1	TRUE
GFAP	non-TF	2.819e-30	0.857954	0.769	0.522	4.25613e-26	SC-2	TRUE
FAM107A	non-TF	7.343e-27	0.711878	0.429	0.186	1.10865e-22	SC-2
CD24	non-TF	4.28805e-24	0.632098	0.705	0.432	6.47411e-20	SC-2
PRSS23	non-TF	1.90769e-25	0.569348	0.789	0.548	2.88023e-21	SC-2
SPARCL1	non-TF	1.65925e-17	0.558243	0.53	0.315	2.50514e-13	SC-2
FXYD3	non-TF	3.70776e-14	0.52833	0.64	0.433	5.59797e-10	SC-2
SPARC	non-TF	2.43384e-20	0.513307	0.655	0.405	3.67461e-16	SC-2	TRUE
LIMA1	non-TF	2.65226e-15	0.502847	0.71	0.501	4.00439e-11	SC-2
KRT18	non-TF	6.03257e-15	0.491452	0.963	0.869	9.10798e-11	SC-2	TRUE
KRT8	non-TF	5.75049e-16	0.491147	0.785	0.566	8.68208e-12	SC-2
SELENOW	non-TF	4.13275e-17	0.489906	0.684	0.46	6.23963e-13	SC-2
COX7A1	non-TF	3.49547e-14	0.477665	0.602	0.407	5.27747e-10	SC-2
AMD1	non-TF	3.16423e-13	0.47217	0.703	0.499	4.77736e-09	SC-2	TRUE
GSN	non-TF	2.91511e-14	0.462955	0.857	0.689	4.40123e-10	SC-2
HSPB1	non-TF	1.61595e-14	0.448503	0.673	0.463	2.43976e-10	SC-2	TRUE
DBI	non-TF	5.51915e-15	0.443363	0.593	0.38	8.33281e-11	SC-2	TRUE
PTN	non-TF	5.1392e-11	0.425994	0.664	0.471	7.75916e-07	SC-2
DKK3	non-TF	7.46491e-12	0.42159	0.182	0.074	1.12705e-07	SC-2	TRUE
PYCARD	non-TF	1.32894e-17	0.417253	0.218	0.076	2.00643e-13	SC-2
OTOL1	non-TF	3.42974e-12	0.414325	0.609	0.417	5.17822e-08	SC-2
C4orf48	non-TF	2.34632e-15	0.412929	0.664	0.437	3.54247e-11	SC-2
BOC	non-TF	4.92804e-16	0.406175	0.303	0.136	7.44036e-12	SC-2
S100A14	non-TF	5.35699e-09	0.395028	0.554	0.397	8.08799e-05	SC-2
TMEM126A	non-TF	2.25871e-09	0.394809	0.288	0.164	3.41019e-05	SC-2
GPX3	non-TF	3.15103e-11	0.384514	0.426	0.26	4.75742e-07	SC-2
HCFC1R1	non-TF	3.03456e-12	0.374976	0.479	0.299	4.58158e-08	SC-2
AHNAK	non-TF	9.60956e-10	0.374212	0.418	0.263	1.45085e-05	SC-2
MGP	non-TF	1.70137e-07	0.372079	0.141	0.065	0.00256873	SC-2
MYL9	non-TF	2.13553e-11	0.371038	0.266	0.134	3.22422e-07	SC-2
SNORC	non-TF	1.41703e-07	0.370213	0.484	0.345	0.00213943	SC-2
FAT1	non-TF	2.00837e-12	0.370169	0.255	0.121	3.03224e-08	SC-2
FRZB	non-TF	1.31017e-05	0.367651	0.127	0.065	0.19781	SC-2
ANXA3	non-TF	8.24383e-14	0.367456	0.598	0.383	1.24465e-09	SC-2
NR2F1	TF	2.80506e-08	0.363743	0.174	0.084	0.000423508	SC-2
FKBP8	non-TF	5.28149e-08	0.362021	0.255	0.147	0.000797399	SC-2
CADM4	non-TF	1.53146e-06	0.360266	0.222	0.131	0.023122	SC-2
SLC1A3	non-TF	4.90347e-16	0.358971	0.431	0.229	7.40325e-12	SC-2	TRUE
S100A4	non-TF	3.55255e-09	0.358391	0.495	0.334	5.36364e-05	SC-2	TRUE
CBR1	non-TF	5.1095e-10	0.356746	0.369	0.223	7.71433e-06	SC-2	TRUE
RPL36	non-TF	5.83029e-16	0.353295	0.919	0.757	8.80257e-12	SC-2
FOS	TF	7.07459e-12	0.353147	0.815	0.622	1.06812e-07	SC-2	TRUE
SLITRK6	non-TF	2.70768e-12	0.352094	0.145	0.049	4.08805e-08	SC-2	TRUE
NDUFAF8	non-TF	2.87703e-10	0.351734	0.415	0.26	4.34374e-06	SC-2
MT-CO3	non-TF	1.85101e-27	0.346799	1	0.992	2.79466e-23	SC-2
RHOU	non-TF	5.3727e-12	0.345993	0.218	0.096	8.1117e-08	SC-2
RASGRP1	non-TF	6.67673e-09	0.343827	0.332	0.201	0.000100805	SC-2	TRUE
CYB5A	non-TF	5.29306e-10	0.343294	0.523	0.356	7.99146e-06	SC-2
LAMTOR4	non-TF	8.84908e-11	0.342619	0.545	0.368	1.33603e-06	SC-2
JTB	non-TF	9.69298e-11	0.34222	0.501	0.328	1.46345e-06	SC-2
CRYAB	non-TF	3.5853e-06	0.341753	0.505	0.368	0.0541309	SC-2
CD99	non-TF	4.85456e-14	1.83075	0.971	0.359	7.32942e-10	SC-4
RPS27	non-TF	2.04308e-23	1.74756	1	0.905	3.08465e-19	SC-4
ROMO1	non-TF	4.10126e-15	1.69884	1	0.549	6.19208e-11	SC-4
COX17	non-TF	2.59384e-18	1.57403	1	0.753	3.91618e-14	SC-4
CMYA5	non-TF	3.20336e-05	1.55213	0.714	0.369	0.483643	SC-4
RPL37	non-TF	1.0576e-19	1.54986	1	0.774	1.59677e-15	SC-4
RPL28	non-TF	1.60218e-22	1.49394	1	0.935	2.41897e-18	SC-4
RPS21	non-TF	3.15068e-15	1.48939	1	0.642	4.7569e-11	SC-4
RPS28	non-TF	3.66957e-21	1.48476	1	0.902	5.54032e-17	SC-4
LMO4	non-TF	9.5099e-12	1.41181	1	0.477	1.4358e-07	SC-4
RPL34	non-TF	4.09724e-17	1.37749	1	0.91	6.18601e-13	SC-4
PRR34-AS1	non-TF	1.10199e-17	1.35766	0.8	0.204	1.66379e-13	SC-4
RPS15	non-TF	3.13793e-19	1.35246	1	0.891	4.73765e-15	SC-4
HES1	TF	3.06891e-13	1.34022	0.6	0.15	4.63345e-09	SC-4	TRUE
POLR2I	non-TF	4.99086e-12	1.30499	0.914	0.428	7.5352e-08	SC-4
RPLP2	non-TF	5.86842e-17	1.2828	1	0.843	8.86014e-13	SC-4
RPS11	non-TF	7.52852e-15	1.27381	0.971	0.691	1.13666e-10	SC-4
TMEM258	non-TF	1.78959e-13	1.2488	0.971	0.476	2.70193e-09	SC-4
AP001453.2	non-TF	1.52172e-18	1.24057	0.886	0.235	2.29749e-14	SC-4
RPL37A	non-TF	2.87358e-17	1.23974	1	0.856	4.33854e-13	SC-4
TMA7	non-TF	2.77166e-13	1.2321	1	0.701	4.18466e-09	SC-4
RPS20	non-TF	6.1608e-13	1.23175	1	0.685	9.30158e-09	SC-4
RPL27A	non-TF	1.3007e-11	1.23022	1	0.637	1.9638e-07	SC-4
TIMM8B	non-TF	3.28573e-12	1.22978	0.943	0.393	4.9608e-08	SC-4
UQCR11	non-TF	8.81977e-13	1.22921	1	0.537	1.33161e-08	SC-4
SVIP	non-TF	3.20564e-11	1.22398	0.971	0.419	4.83988e-07	SC-4
COPS9	non-TF	8.87531e-12	1.21105	0.971	0.486	1.33999e-07	SC-4
RPL32	non-TF	2.16917e-17	1.20766	1	0.89	3.27501e-13	SC-4
COMMD6	non-TF	9.94703e-12	1.19674	0.943	0.51	1.5018e-07	SC-4
RPL23	non-TF	7.0316e-17	1.19561	1	0.839	1.06163e-12	SC-4
OST4	non-TF	1.89927e-13	1.18716	0.943	0.728	2.86752e-09	SC-4
TRIR	non-TF	4.55465e-10	1.18393	0.886	0.395	6.87661e-06	SC-4
RPS12	non-TF	4.61951e-17	1.18044	1	0.913	6.97453e-13	SC-4
CSTB	non-TF	1.18354e-15	1.16942	1	0.774	1.7869e-11	SC-4
RPL23A	non-TF	1.20139e-17	1.16748	1	0.841	1.81386e-13	SC-4
LTBP3	non-TF	1.19321e-12	1.16716	0.886	0.31	1.80151e-08	SC-4
RPS18	non-TF	9.16021e-16	1.16685	1	0.866	1.38301e-11	SC-4
RPL26	non-TF	8.35098e-19	1.16641	1	0.937	1.26083e-14	SC-4
ATP5MD	non-TF	3.3954e-08	1.16133	0.971	0.577	0.000512637	SC-4
ATP5ME	non-TF	8.68804e-11	1.15597	0.943	0.518	1.31172e-06	SC-4
RPS15A	non-TF	1.33191e-15	1.1523	1	0.836	2.01092e-11	SC-4
RPL24	non-TF	5.54339e-15	1.12295	1	0.785	8.36941e-11	SC-4
WASF2	non-TF	1.94957e-09	1.11515	0.914	0.407	2.94347e-05	SC-4
RPL35A	non-TF	1.295e-15	1.10299	1	0.842	1.95519e-11	SC-4
SERTAD4-AS1	non-TF	4.45024e-17	1.09267	0.6	0.119	6.71897e-13	SC-4
ATP5F1E	non-TF	2.3568e-14	1.08777	1	0.845	3.55829e-10	SC-4	TRUE
RPL39	non-TF	0.00129642	1.0858	1	0.937	1	SC-4
SAA1	non-TF	1.33366e-51	1.55076	0.863	0.444	2.01356e-47	SC-3	TRUE
SAA2	non-TF	1.14605e-31	1.16592	0.498	0.166	1.7303e-27	SC-3
EGR1	TF	2.32188e-38	1.14368	0.902	0.626	3.50557e-34	SC-3	TRUE
LRRC75A	non-TF	5.65679e-31	1.10938	0.727	0.334	8.54063e-27	SC-3
WTAP	non-TF	3.81326e-18	1.10174	0.629	0.384	5.75726e-14	SC-3
C1orf56	non-TF	6.95227e-19	1.04854	0.605	0.318	1.04965e-14	SC-3
B4GALT1	non-TF	1.32975e-18	0.983251	0.634	0.369	2.00766e-14	SC-3
REG1A	non-TF	7.07517e-15	0.979252	0.112	0.019	1.06821e-10	SC-3	TRUE
CLDN11	non-TF	3.35491e-13	0.96539	0.395	0.196	5.06525e-09	SC-3
HNRNPH1	non-TF	1.14773e-21	0.953264	0.78	0.515	1.73284e-17	SC-3
AKAP12	non-TF	2.52932e-18	0.936401	0.78	0.55	3.81877e-14	SC-3
CTNNB1	non-TF	9.11745e-20	0.920148	0.683	0.381	1.37655e-15	SC-3	TRUE
IRF2BPL	non-TF	2.32994e-13	0.868675	0.517	0.3	3.51774e-09	SC-3
CALR	non-TF	7.73987e-15	0.841442	0.668	0.442	1.16856e-10	SC-3	TRUE
INSR	non-TF	3.10249e-08	0.83455	0.356	0.205	0.000468414	SC-3	TRUE
GOLIM4	non-TF	1.38105e-08	0.834067	0.429	0.268	0.000208511	SC-3
NFIB	TF	4.21279e-14	0.828366	0.668	0.475	6.36046e-10	SC-3	TRUE
AC092069.1	non-TF	4.50135e-12	0.827423	0.195	0.063	6.79613e-08	SC-3
MARCKS	non-TF	1.0008e-16	0.827371	0.776	0.594	1.511e-12	SC-3	TRUE
RBM6	non-TF	5.9757e-11	0.815176	0.434	0.235	9.02211e-07	SC-3
IQCK	non-TF	1.97274e-09	0.813456	0.41	0.245	2.97844e-05	SC-3
VMP1	non-TF	3.02669e-08	0.796223	0.551	0.397	0.000456969	SC-3
ARRDC3	non-TF	1.96025e-08	0.780469	0.537	0.378	0.000295958	SC-3
CDC42SE1	non-TF	7.7027e-12	0.77716	0.439	0.237	1.16295e-07	SC-3
NOG	non-TF	7.99455e-09	0.777122	0.424	0.254	0.000120702	SC-3
MDM4	non-TF	4.01616e-07	0.740858	0.273	0.146	0.0060636	SC-3	TRUE
RGPD5	non-TF	4.36374e-09	0.723115	0.137	0.042	6.58837e-05	SC-3
P4HA2	non-TF	0.000117781	0.716129	0.361	0.251	1	SC-3
CDC42	non-TF	4.27047e-12	0.692155	0.702	0.536	6.44756e-08	SC-3	TRUE
IAH1	non-TF	8.91599e-09	0.675773	0.312	0.161	0.000134614	SC-3
AC106707.1	non-TF	1.29787e-05	0.656292	0.239	0.134	0.195953	SC-3
SERPINE2	non-TF	7.69692e-07	0.652264	0.488	0.338	0.0116208	SC-3
AL450306.1	non-TF	3.97055e-07	0.639666	0.239	0.118	0.00599474	SC-3
SDC4	non-TF	2.39122e-07	0.635347	0.62	0.473	0.00361027	SC-3
PPP3CA	non-TF	7.84654e-10	0.628392	0.595	0.399	1.18467e-05	SC-3	TRUE
F3	non-TF	4.48493e-05	0.615976	0.439	0.325	0.677135	SC-3	TRUE
DNAJB14	non-TF	0.00480605	0.613097	0.19	0.127	1	SC-3
RSRC1	non-TF	1.31683e-06	0.610285	0.327	0.195	0.0198814	SC-3
TBL1XR1	non-TF	0.000293435	0.597042	0.454	0.366	1	SC-3	TRUE
CCNC	non-TF	0.0052008	0.582631	0.2	0.135	1	SC-3
SLC34A2	non-TF	2.91264e-12	0.576306	0.902	0.779	4.3975e-08	SC-3	TRUE
SET	non-TF	1.65579e-13	0.572105	0.834	0.716	2.49992e-09	SC-3
FOXP1	TF	1.64222e-06	0.568834	0.434	0.294	0.0247942	SC-3
FLCN	non-TF	0.00470925	0.566844	0.146	0.089	1	SC-3	TRUE
PIGR	non-TF	4.79823e-52	1.72617	0.623	0.387	7.24437e-48	SC-6
EIF5A	non-TF	4.18894e-32	1.2551	0.509	0.293	6.32446e-28	SC-6	TRUE
GPRC5B	non-TF	1.78427e-17	1.0806	0.358	0.21	2.6939e-13	SC-6
AMFR	non-TF	1.94426e-18	1.07049	0.309	0.155	2.93544e-14	SC-6
ROCR	non-TF	2.80816e-20	0.942911	0.171	0.048	4.23977e-16	SC-6
KCNJ16	non-TF	6.64373e-11	0.793753	0.147	0.06	1.00307e-06	SC-6
NUCKS1	non-TF	8.54683e-12	0.786643	0.546	0.496	1.2904e-07	SC-6
SLC12A2	non-TF	9.52613e-12	0.777325	0.555	0.48	1.43826e-07	SC-6	TRUE
ARPC4	non-TF	1.28255e-06	0.732809	0.197	0.122	0.019364	SC-6
CHP1	non-TF	6.39855e-07	0.713084	0.482	0.461	0.00966053	SC-6
IFI6	non-TF	0.00241572	0.691064	0.18	0.139	1	SC-6
ANKRD1	non-TF	6.68629e-06	0.68928	0.112	0.056	0.10095	SC-6
PHKG1	non-TF	2.9114e-07	0.6706	0.123	0.058	0.00439563	SC-6	TRUE
ATP1B1	non-TF	9.24021e-24	0.664924	0.73	0.671	1.39509e-19	SC-6	TRUE
ACTB	non-TF	1.44972e-35	0.656406	0.879	0.822	2.18879e-31	SC-6	TRUE
ZDHHC2	non-TF	0.000434597	0.650217	0.261	0.211	1	SC-6
AGR2	non-TF	0.0072151	0.646693	0.164	0.128	1	SC-6
RIN2	non-TF	0.000294567	0.645868	0.158	0.107	1	SC-6
NFIA	TF	5.6451e-05	0.635228	0.257	0.194	0.852297	SC-6
CARMIL1	non-TF	0.00414998	0.623676	0.241	0.199	1	SC-6
TRA2A	non-TF	0.00039573	0.602788	0.259	0.205	1	SC-6
CNOT9	non-TF	0.00658876	0.600481	0.171	0.135	1	SC-6
AP1G1	non-TF	0.0053014	0.588026	0.188	0.147	1	SC-6
AKR1C2	non-TF	0.000265901	0.572821	0.108	0.063	1	SC-6	TRUE
LAYN	non-TF	0.00103439	0.570355	0.388	0.342	1	SC-6
DHRS3	non-TF	0.00831261	0.569603	0.377	0.371	1	SC-6
PSMA3-AS1	non-TF	0.00466652	0.56677	0.208	0.168	1	SC-6
MIAT	non-TF	3.94577e-07	0.565536	0.281	0.193	0.00595732	SC-6
CBX6	non-TF	0.000321795	0.563071	0.443	0.427	1	SC-6
TOR1AIP2	non-TF	0.00201787	0.536537	0.417	0.41	1	SC-6
ARF6	non-TF	2.83295e-28	1.25711	0.863	0.214	4.27719e-24	SC-5	TRUE
EGLN3	non-TF	6.17337e-19	1.1716	1	0.494	9.32055e-15	SC-5	TRUE
SERINC5	non-TF	1.24252e-19	1.11203	0.922	0.325	1.87596e-15	SC-5
KRT6A	non-TF	6.0153e-58	1.0956	0.588	0.044	9.0819e-54	SC-5	TRUE
S100A2	non-TF	1.21234e-19	1.05986	1	0.805	1.83039e-15	SC-5	TRUE
VEGFA	non-TF	3.6969e-23	1.0094	0.863	0.223	5.58159e-19	SC-5	TRUE
PPP1CB	non-TF	2.56121e-15	0.977607	1	0.526	3.86692e-11	SC-5
RAP2B	non-TF	1.85501e-41	0.975484	0.549	0.057	2.80069e-37	SC-5
AL133453.1	non-TF	3.13042e-23	0.95276	0.902	0.236	4.7263e-19	SC-5
DLG5	non-TF	1.11911e-27	0.902313	0.745	0.144	1.68964e-23	SC-5	TRUE
CDC42SE2	non-TF	9.32068e-29	0.902003	0.745	0.141	1.40724e-24	SC-5
DOCK5	non-TF	2.79648e-26	0.895487	0.686	0.132	4.22213e-22	SC-5
PLIN3	non-TF	7.68117e-28	0.89403	0.647	0.114	1.1597e-23	SC-5	TRUE
AC005921.2	non-TF	1.50101e-21	0.893059	0.745	0.185	2.26622e-17	SC-5
PAQR7	non-TF	9.69357e-34	0.869853	0.471	0.051	1.46354e-29	SC-5
CRIM1	non-TF	3.68845e-28	0.86745	0.686	0.123	5.56882e-24	SC-5
DUSP6	non-TF	8.05883e-17	0.866508	0.843	0.28	1.21672e-12	SC-5	TRUE
BCL10	non-TF	1.92676e-22	0.84774	0.588	0.116	2.90903e-18	SC-5
ISG15	non-TF	2.11627e-15	2.16988	0.929	0.181	3.19514e-11	SCLC	TRUE
IFI27	non-TF	5.37198e-07	1.38444	1	0.694	0.00811062	SCLC	TRUE
CTGF	non-TF	5.39302e-08	1.34574	1	0.436	0.000814238	SCLC
IFI44L	non-TF	4.03864e-30	1.33823	0.714	0.045	6.09754e-26	SCLC
IFIT3	non-TF	5.65772e-26	1.28884	0.857	0.074	8.54202e-22	SCLC
LY6E	non-TF	9.28541e-17	1.23512	0.786	0.099	1.40191e-12	SCLC
KRT7	non-TF	4.43824e-21	1.21547	0.929	0.106	6.70086e-17	SCLC
DDX21	non-TF	4.4557e-12	1.13714	1	0.208	6.72721e-08	SCLC
NHP2	non-TF	3.50261e-07	1.11201	1	0.405	0.00528824	SCLC
PLSCR1	TF	4.72927e-13	1.10911	0.929	0.165	7.14026e-09	SCLC
AXL	non-TF	7.50219e-14	1.07964	1	0.178	1.13268e-09	SCLC	TRUE
WDR43	non-TF	4.92301e-12	1.06107	1	0.201	7.43276e-08	SCLC
PFDN2	non-TF	2.17891e-06	1.06085	1	0.45	0.0328972	SCLC
MX1	non-TF	1.526e-18	1.01938	0.714	0.071	2.30396e-14	SCLC
NPM1	non-TF	2.25554e-05	1.01797	1	0.536	0.340541	SCLC	TRUE
THBS1	non-TF	1.49748e-12	0.997114	0.786	0.122	2.2609e-08	SCLC	TRUE
RPL22L1	non-TF	1.63076e-07	0.992784	0.857	0.24	0.00246212	SCLC
LETM1	non-TF	9.41741e-13	0.979558	0.929	0.165	1.42184e-08	SCLC
ESM1	non-TF	3.37745e-79	0.974844	0.714	0.014	5.09927e-75	SCLC
PPA1	non-TF	1.14755e-06	0.938267	1	0.333	0.0173258	SCLC	TRUE
GPATCH4	non-TF	1.37661e-11	0.920222	0.929	0.174	2.0784e-07	SCLC
OSTC	non-TF	4.03556e-09	0.899724	1	0.249	6.0929e-05	SCLC
COPS5	non-TF	1.12884e-17	0.899159	0.857	0.103	1.70433e-13	SCLC
FAM96B	non-TF	4.05019e-08	0.882917	1	0.275	0.000611498	SCLC
RNF43	non-TF	4.85111e-13	0.8804	0.786	0.116	7.3242e-09	SCLC	TRUE
HMGA1	TF	5.26593e-05	0.867547	1	0.512	0.795051	SCLC
ATP5MC1	non-TF	6.28618e-05	0.86749	1	0.61	0.949088	SCLC
EIF1AX	non-TF	6.90296e-06	0.864217	1	0.394	0.104221	SCLC
NAA10	non-TF	1.84881e-08	0.862208	0.786	0.178	0.000279133	SCLC
RPL29	non-TF	8.92551e-06	0.854899	1	0.753	0.134757	SCLC
KRT19	non-TF	4.77331e-05	0.849278	1	0.759	0.720674	SCLC	TRUE
HSPD1	non-TF	7.32019e-05	0.843449	1	0.55	1	SCLC	TRUE
SSSCA1	non-TF	8.44434e-08	0.823685	0.786	0.186	0.00127493	SCLC

## Sheet: Table S6. Treated Top 50 genes
Table S6. Top 50 DEGs from a gentamicin-treated utricle (scGent-2). Wilcoxon rank-sum test, with a Bonferroni Padj < .05. Related to Figure 7.
Colours are matched to Figure 7c and 7d cluster colours. Transcription factors (TF) were detected using AnimalTFDB 3.0, druggable targets using DGIdb 4.0.
Gene	TF	p_val	avg_log2FC	pct.1	pct.2	p_val_adj	Cluster	Drug
SELENOK	non-TF	2.16216e-42	3.77728	0.717	0.142	2.91438e-38	Damaged HC
CXCL14	non-TF	1.34877e-33	3.56737	0.25	0.017	1.818e-29	Damaged HC
TAC1	non-TF	3.59026e-92	3.41038	0.317	0.007	4.83931e-88	Damaged HC	TRUE
IRX2	TF	1.12409e-53	3.32693	0.3	0.015	1.51516e-49	Damaged HC
CFAP157	non-TF	1.79404e-69	3.12595	0.283	0.008	2.41818e-65	Damaged HC
SYT14	non-TF	2.90056e-73	2.84727	0.25	0.005	3.90967e-69	Damaged HC
MVD	non-TF	3.98561e-40	2.78596	0.217	0.01	5.37221e-36	Damaged HC	TRUE
BMP2	non-TF	6.39224e-44	2.77996	0.217	0.009	8.6161e-40	Damaged HC	TRUE
NIN	non-TF	9.33641e-38	2.58936	0.267	0.017	1.25845e-33	Damaged HC
FAM183A	non-TF	5.56402e-44	2.57617	0.133	0.002	7.49974e-40	Damaged HC
ESPN	non-TF	7.98786e-57	2.57123	0.217	0.006	1.07668e-52	Damaged HC
PCP4	non-TF	9.93328e-34	2.54478	0.117	0.003	1.33891e-29	Damaged HC
CHRNA9	non-TF	3.63519e-74	2.50633	0.167	0.001	4.89987e-70	Damaged HC	TRUE
MTRNR2L8	non-TF	3.17609e-28	2.50525	0.7	0.183	4.28105e-24	Damaged HC
RBM24	non-TF	2.4771e-59	2.49234	0.233	0.007	3.33888e-55	Damaged HC
CPE	non-TF	6.71671e-30	2.47405	0.283	0.026	9.05345e-26	Damaged HC
MTRNR2L12	non-TF	2.90003e-27	2.46061	0.767	0.27	3.90895e-23	Damaged HC
SGIP1	non-TF	1.83616e-80	2.45773	0.167	0.001	2.47496e-76	Damaged HC
GFI1	TF	5.82799e-40	2.45014	0.217	0.01	7.85554e-36	Damaged HC
GGA3	non-TF	6.11432e-20	2.44312	0.2	0.02	8.2415e-16	Damaged HC
LINC02265	non-TF	2.4852e-68	2.41581	0.117	0	3.3498e-64	Damaged HC
C22orf42	non-TF	4.0634e-31	2.40951	0.167	0.008	5.47706e-27	Damaged HC
ABCA5	non-TF	5.4901e-21	2.40218	0.2	0.019	7.4001e-17	Damaged HC	TRUE
TNRC6B	non-TF	1.9783e-23	2.40181	0.367	0.057	2.66655e-19	Damaged HC
ATP2B2	non-TF	2.75098e-45	2.39518	0.167	0.004	3.70805e-41	Damaged HC
PLS1	non-TF	2.10717e-13	2.37583	0.417	0.121	2.84025e-09	Damaged HC
CABP2	non-TF	3.93897e-35	2.37577	0.183	0.008	5.30934e-31	Damaged HC
PRKCD	non-TF	1.28492e-16	2.37268	0.2	0.024	1.73194e-12	Damaged HC	TRUE
CETN2	non-TF	1.66189e-15	2.36331	0.183	0.022	2.24007e-11	Damaged HC
STRC	non-TF	3.32462e-38	2.355	0.133	0.003	4.48126e-34	Damaged HC
CALM1	non-TF	2.78361e-15	2.34401	0.45	0.122	3.75202e-11	Damaged HC	TRUE
GPX2	non-TF	4.31896e-32	2.34099	0.133	0.004	5.82152e-28	Damaged HC
CTXND2	non-TF	1.42552e-77	2.32722	0.183	0.002	1.92146e-73	Damaged HC
VSIG10L2	non-TF	5.15819e-44	2.30101	0.133	0.002	6.95273e-40	Damaged HC
PEG10	non-TF	3.68203e-22	2.27305	0.233	0.024	4.963e-18	Damaged HC
DNER	non-TF	9.48883e-14	2.26929	0.267	0.051	1.279e-09	Damaged HC	TRUE
TRIM36	non-TF	1.75877e-39	2.22298	0.117	0.002	2.37065e-35	Damaged HC
ID4	TF	3.33017e-12	2.12696	0.2	0.032	4.48873e-08	Damaged HC
EMX2	TF	7.24939e-31	2.11062	0.183	0.01	9.77145e-27	Damaged HC
ICA1L	non-TF	2.45995e-21	2.09463	0.15	0.01	3.31577e-17	Damaged HC
AL078639.1	non-TF	7.77671e-29	2.06341	0.133	0.005	1.04822e-24	Damaged HC
NRIP1	non-TF	3.86569e-10	2.05445	0.25	0.058	5.21056e-06	Damaged HC	TRUE
ADGRV1	non-TF	2.21008e-30	1.98989	0.133	0.005	2.97897e-26	Damaged HC	TRUE
TANC2	non-TF	1.74894e-08	1.97833	0.2	0.045	0.00023574	Damaged HC	TRUE
CIB3	non-TF	5.67034e-44	1.95645	0.133	0.002	7.64305e-40	Damaged HC
AKT2	non-TF	5.46028e-10	1.9456	0.25	0.059	7.35991e-06	Damaged HC	TRUE
DAGLA	non-TF	2.15671e-25	1.93866	0.167	0.01	2.90703e-21	Damaged HC	TRUE
LMO7	non-TF	5.57152e-19	1.93227	0.15	0.011	7.50986e-15	Damaged HC
USH1C	non-TF	1.82025e-12	1.93119	0.117	0.011	2.45352e-08	Damaged HC
AP3B2	non-TF	2.55215e-30	1.92453	0.133	0.005	3.44005e-26	Damaged HC
LCN2	non-TF	1.15002e-13	1.0946	0.227	0.116	1.55011e-09	SC-1
CMYA5	non-TF	4.20315e-36	0.753241	0.854	0.706	5.66543e-32	SC-1
IFITM2	non-TF	7.48721e-07	0.735902	0.196	0.123	0.010092	SC-1
SOD2	non-TF	4.20467e-13	0.730243	0.472	0.339	5.66748e-09	SC-1	TRUE
MGST1	non-TF	3.35986e-05	0.696661	0.151	0.096	0.452876	SC-1
GRHPR	non-TF	0.00191213	0.644784	0.145	0.105	1	SC-1
SNHG9	non-TF	3.05911e-11	0.635715	0.434	0.318	4.12337e-07	SC-1
NME1	non-TF	7.7734e-05	0.627789	0.135	0.085	1	SC-1	TRUE
GAP43	non-TF	0.000131815	0.6086	0.148	0.096	1	SC-1
TPBG	non-TF	2.62118e-07	0.592324	0.39	0.299	0.00353309	SC-1	TRUE
NPM3	non-TF	7.96092e-06	0.584092	0.274	0.2	0.107305	SC-1
RPL4	non-TF	3.29194e-11	0.562139	0.554	0.446	4.43721e-07	SC-1
S100A14	non-TF	1.37436e-23	0.558291	0.842	0.701	1.8525e-19	SC-1
LRMDA	non-TF	0.00038155	0.525647	0.113	0.071	1	SC-1	TRUE
POLR2I	non-TF	0.00062039	0.495789	0.135	0.09	1	SC-1
CST3	non-TF	1.10212e-05	0.481803	0.426	0.362	0.148555	SC-1	TRUE
HINT1	non-TF	5.04058e-07	0.479411	0.484	0.407	0.00679419	SC-1	TRUE
RPS5	non-TF	0.000314486	0.467426	0.207	0.152	1	SC-1
TBCA	non-TF	3.6897e-09	0.456946	0.601	0.515	4.97335e-05	SC-1
WASF2	non-TF	1.99472e-08	0.455742	0.528	0.43	0.000268868	SC-1
TRIR	non-TF	5.28962e-06	0.448692	0.457	0.378	0.0712989	SC-1
EIF2S2	non-TF	2.06268e-05	0.436451	0.44	0.372	0.278028	SC-1
MRPL33	non-TF	0.000475227	0.435993	0.336	0.281	1	SC-1
ITM2B	non-TF	1.93375e-08	0.4226	0.568	0.486	0.00026065	SC-1
SPOCD1	non-TF	2.89887e-06	0.417513	0.511	0.435	0.0390738	SC-1
ATP5MC2	non-TF	0.000870877	0.408676	0.377	0.329	1	SC-1
CSTB	non-TF	0.00046848	0.40598	0.457	0.406	1	SC-1
CEBPD	TF	1.54743e-08	0.405267	0.645	0.57	0.000208577	SC-1
LTBP3	non-TF	0.000551406	0.404421	0.274	0.217	1	SC-1
FBXO2	non-TF	0.000184065	0.400969	0.346	0.282	1	SC-1
PDCD5	non-TF	0.00518869	0.398807	0.294	0.253	1	SC-1
CD99	non-TF	4.02979e-11	0.391465	0.737	0.627	5.43175e-07	SC-1
TIMM17A	non-TF	9.44678e-05	0.391424	0.481	0.432	1	SC-1
TUBA1C	non-TF	0.00963167	0.389456	0.18	0.142	1	SC-1	TRUE
ATN1	non-TF	0.00873833	0.388589	0.283	0.245	1	SC-1
RBP1	non-TF	0.00270689	0.383457	0.385	0.344	1	SC-1
RPL35	non-TF	1.41576e-09	0.383015	0.729	0.672	1.9083e-05	SC-1
RPS12	non-TF	1.31547e-12	0.381192	0.831	0.782	1.77313e-08	SC-1
RPLP0	non-TF	0.000992067	0.367715	0.492	0.458	1	SC-1
PCBP1	non-TF	0.00189405	0.36766	0.402	0.359	1	SC-1
RPL41	non-TF	1.23798e-19	0.361187	0.965	0.919	1.66867e-15	SC-1
IFITM3	non-TF	2.45551e-08	0.358575	0.709	0.642	0.000330978	SC-1
RPLP1	non-TF	3.55651e-14	0.35394	0.889	0.825	4.79383e-10	SC-1
CBX3	non-TF	0.00133837	0.332046	0.387	0.335	1	SC-1
COX17	non-TF	2.32026e-07	0.328404	0.674	0.605	0.00312748	SC-1
GSN	non-TF	0.003718	0.305634	0.391	0.335	1	SC-1
RPS15	non-TF	0.00642849	0.273267	0.423	0.379	1	SC-1
RPL18A	non-TF	0.000637503	0.270588	0.565	0.531	1	SC-1
RPLP2	non-TF	0.000593511	0.269449	0.604	0.572	1	SC-1
RPL31	non-TF	3.36059e-06	0.26921	0.735	0.682	0.0452974	SC-1
CTGF	non-TF	1.88746e-64	1.7637	0.739	0.482	2.54411e-60	SC-2
TACSTD2	non-TF	4.26786e-25	1.33286	0.296	0.126	5.75265e-21	SC-2	TRUE
SPP1	non-TF	1.21769e-10	1.24311	0.317	0.208	1.64132e-06	SC-2	TRUE
PMP22	non-TF	9.21082e-14	0.971999	0.284	0.158	1.24153e-09	SC-2	TRUE
EMP1	non-TF	5.36718e-28	0.958684	0.617	0.421	7.23442e-24	SC-2	TRUE
FGF2	non-TF	6.34656e-10	0.935975	0.21	0.116	8.55453e-06	SC-2	TRUE
RGS4	non-TF	2.29358e-16	0.921669	0.385	0.234	3.09152e-12	SC-2	TRUE
ITGA2	non-TF	4.54019e-28	0.921209	0.59	0.382	6.11972e-24	SC-2	TRUE
MYC	TF	3.26932e-16	0.898814	0.169	0.062	4.40671e-12	SC-2	TRUE
TM4SF1	non-TF	1.69017e-09	0.898416	0.187	0.1	2.27818e-05	SC-2
RAD23B	non-TF	1.39026e-10	0.888062	0.136	0.058	1.87393e-06	SC-2
MCOLN3	non-TF	4.77227e-10	0.87128	0.164	0.079	6.43254e-06	SC-2	TRUE
LAMB3	non-TF	1.73977e-16	0.850083	0.502	0.35	2.34503e-12	SC-2	TRUE
NEDD4	non-TF	1.16041e-12	0.835905	0.226	0.115	1.56412e-08	SC-2	TRUE
ACTR2	non-TF	7.82237e-14	0.825362	0.174	0.072	1.05438e-09	SC-2	TRUE
CD24	non-TF	1.18046e-09	0.815868	0.261	0.16	1.59114e-05	SC-2
DUSP1	non-TF	2.06343e-06	0.784713	0.119	0.062	0.027813	SC-2	TRUE
SERPINE1	non-TF	3.13796e-06	0.776346	0.15	0.087	0.0422965	SC-2	TRUE
EIF4G2	non-TF	1.05724e-12	0.775853	0.294	0.168	1.42505e-08	SC-2
ACTG1	non-TF	8.05704e-35	0.767076	0.815	0.65	1.08601e-30	SC-2	TRUE
CYR61	non-TF	6.26663e-08	0.765494	0.273	0.181	0.00084468	SC-2
EIF3A	non-TF	2.35366e-11	0.754049	0.255	0.141	3.1725e-07	SC-2	TRUE
BMI1	non-TF	9.06716e-06	0.753128	0.104	0.055	0.122216	SC-2
KPNA4	non-TF	8.14983e-08	0.7444	0.126	0.061	0.00109852	SC-2
ODC1	non-TF	4.51461e-10	0.740715	0.238	0.135	6.08524e-06	SC-2	TRUE
PGM2L1	non-TF	2.29981e-08	0.737354	0.192	0.108	0.000309992	SC-2
FLNC	non-TF	6.63208e-07	0.730897	0.162	0.093	0.00893938	SC-2
DDX3X	non-TF	6.03448e-09	0.727037	0.231	0.137	8.13387e-05	SC-2
TMEM123	non-TF	1.16227e-09	0.718628	0.104	0.04	1.56662e-05	SC-2
EIF3M	non-TF	5.97572e-09	0.716932	0.109	0.046	8.05467e-05	SC-2
THBS1	non-TF	1.12578e-07	0.709953	0.19	0.111	0.00151743	SC-2	TRUE
LRRC8D	non-TF	1.96105e-08	0.708207	0.169	0.089	0.000264329	SC-2
RPL3	non-TF	7.00761e-11	0.70634	0.387	0.264	9.44556e-07	SC-2
SHC4	non-TF	3.39e-06	0.704854	0.102	0.051	0.0456938	SC-2
KCNK1	non-TF	5.34874e-09	0.702391	0.296	0.192	7.20957e-05	SC-2
KLF6	TF	1.77963e-08	0.700081	0.306	0.207	0.000239876	SC-2
CLTA	non-TF	1.89105e-07	0.695991	0.213	0.131	0.00254895	SC-2
LRRFIP2	TF	7.45974e-05	0.694658	0.104	0.059	1	SC-2
IER5	non-TF	3.08797e-11	0.691202	0.131	0.052	4.16228e-07	SC-2
VIM	non-TF	1.45057e-29	0.689448	0.871	0.774	1.95522e-25	SC-2	TRUE
LAMC2	non-TF	1.14625e-07	0.685088	0.306	0.215	0.00154504	SC-2	TRUE
ZNF655	TF	4.56552e-06	0.681583	0.124	0.068	0.0615386	SC-2
SLC12A7	non-TF	2.50104e-06	0.676067	0.231	0.154	0.0337115	SC-2	TRUE
SRSF7	non-TF	1.07817e-05	0.666477	0.136	0.078	0.145327	SC-2
TNPO1	non-TF	4.91711e-07	0.663458	0.116	0.057	0.00662777	SC-2
GRSF1	non-TF	2.93925e-08	0.658994	0.111	0.048	0.000396181	SC-2
CCT4	non-TF	1.65929e-07	0.654637	0.177	0.1	0.00223655	SC-2
RAN	non-TF	1.09628e-11	0.652296	0.34	0.209	1.47767e-07	SC-2
CELF1	non-TF	6.34128e-08	0.64861	0.21	0.125	0.000854741	SC-2
PRNP	non-TF	3.3646e-06	0.646799	0.122	0.065	0.0453514	SC-2	TRUE
DPYSL2	non-TF	1.44317e-78	2.24925	0.317	0.042	1.94525e-74	SC-3	TRUE
IGFBP3	non-TF	1.08435e-77	2.06065	0.608	0.218	1.46159e-73	SC-3	TRUE
TUBA1A	non-TF	8.00448e-59	1.81919	0.303	0.055	1.07892e-54	SC-3	TRUE
EGLN3	non-TF	2.28681e-43	1.61005	0.207	0.033	3.08239e-39	SC-3	TRUE
PGK1	non-TF	3.15535e-58	1.56872	0.665	0.334	4.2531e-54	SC-3	TRUE
RNF183	non-TF	3.6171e-37	1.5124	0.155	0.021	4.87549e-33	SC-3
BNIP3	non-TF	7.61586e-42	1.46347	0.326	0.09	1.02654e-37	SC-3
CHI3L1	non-TF	4.08031e-21	1.43902	0.114	0.022	5.49985e-17	SC-3	TRUE
ANGPTL4	non-TF	2.78314e-34	1.43283	0.103	0.007	3.7514e-30	SC-3
VEGFA	non-TF	1.30703e-41	1.42444	0.374	0.117	1.76174e-37	SC-3	TRUE
IGFBP5	non-TF	3.28375e-43	1.40095	0.649	0.336	4.42617e-39	SC-3	TRUE
SLC2A1	non-TF	3.79473e-28	1.29773	0.23	0.064	5.11492e-24	SC-3	TRUE
SLC34A2	non-TF	1.7905e-53	1.28481	0.745	0.414	2.41342e-49	SC-3	TRUE
SLPI	non-TF	7.04756e-23	1.26911	0.255	0.091	9.4994e-19	SC-3	TRUE
GAS1	non-TF	2.76317e-19	1.18536	0.264	0.107	3.72448e-15	SC-3
WFDC2	non-TF	1.3375e-29	1.17728	0.428	0.186	1.80282e-25	SC-3
NDRG1	non-TF	1.2694e-29	1.17358	0.519	0.274	1.71102e-25	SC-3
S100A1	non-TF	8.77197e-53	1.16918	0.788	0.487	1.18237e-48	SC-3
ITGB4	non-TF	3.68101e-19	1.10612	0.264	0.107	4.96164e-15	SC-3
TNC	non-TF	2.77229e-23	1.10604	0.294	0.112	3.73677e-19	SC-3	TRUE
SLC16A3	non-TF	7.64884e-22	1.10271	0.271	0.102	1.03099e-17	SC-3	TRUE
GAPDH	non-TF	4.74274e-51	1.09331	0.829	0.555	6.39273e-47	SC-3	TRUE
CD9	non-TF	2.43522e-27	1.08155	0.549	0.303	3.28243e-23	SC-3	TRUE
AGT	non-TF	2.1675e-15	1.0465	0.203	0.079	2.92157e-11	SC-3	TRUE
GBE1	non-TF	2.00963e-14	1.03814	0.178	0.067	2.70878e-10	SC-3
MUC1	non-TF	4.72973e-19	1.01334	0.159	0.045	6.37521e-15	SC-3	TRUE
COX7A1	non-TF	1.6367e-15	0.998338	0.278	0.13	2.20611e-11	SC-3
TPI1	non-TF	1.57655e-23	0.985058	0.469	0.244	2.12504e-19	SC-3
IQCK	non-TF	5.66652e-13	0.979587	0.153	0.056	7.6379e-09	SC-3
MIF	non-TF	5.05607e-19	0.977695	0.435	0.242	6.81507e-15	SC-3	TRUE
C4orf3	non-TF	1.2427e-17	0.916425	0.285	0.123	1.67503e-13	SC-3
LRP1	non-TF	5.03412e-16	0.903741	0.146	0.044	6.78549e-12	SC-3	TRUE
GFAP	non-TF	1.32177e-20	0.873442	0.547	0.324	1.78161e-16	SC-3	TRUE
CKB	non-TF	3.46113e-07	0.859298	0.137	0.066	0.00466525	SC-3
PRR34-AS1	non-TF	8.95527e-13	0.83829	0.255	0.125	1.20708e-08	SC-3
PLOD1	non-TF	4.67652e-12	0.826261	0.221	0.104	6.30348e-08	SC-3	TRUE
SLC26A2	non-TF	5.24409e-10	0.80794	0.107	0.037	7.06851e-06	SC-3
SERINC2	non-TF	1.19743e-13	0.799555	0.169	0.062	1.61402e-09	SC-3
QSOX1	non-TF	8.32924e-10	0.790133	0.141	0.058	1.1227e-05	SC-3
P4HA1	non-TF	1.17911e-12	0.786803	0.191	0.079	1.58932e-08	SC-3	TRUE
BRIP1	non-TF	8.18008e-09	0.77761	0.173	0.083	0.000110259	SC-3
TCF4	TF	7.26579e-08	0.777367	0.114	0.048	0.000979356	SC-3
MPZL2	non-TF	5.4663e-08	0.772104	0.121	0.052	0.000736802	SC-3
ZBTB20	TF	1.65535e-08	0.769274	0.273	0.164	0.000223124	SC-3
GPRC5B	non-TF	1.39594e-11	0.760601	0.15	0.058	1.88159e-07	SC-3
S100A2	non-TF	1.70769e-43	1.47935	0.901	0.697	2.3018e-39	SC-4	TRUE
RPL36A	non-TF	3.42968e-29	1.40237	0.568	0.272	4.62286e-25	SC-4
S100A6	non-TF	2.95919e-81	1.29355	1	0.931	3.98869e-77	SC-4
COX7C	non-TF	1.10497e-28	1.26438	0.575	0.281	1.48939e-24	SC-4
RPL38	non-TF	9.26927e-33	1.20524	0.736	0.423	1.2494e-28	SC-4
RPS21	non-TF	6.354e-48	1.17814	0.875	0.552	8.56456e-44	SC-4
NDUFA4	non-TF	2.54829e-21	1.17249	0.59	0.346	3.43484e-17	SC-4	TRUE
TXN	non-TF	4.57374e-23	1.15098	0.626	0.36	6.16494e-19	SC-4	TRUE
RPL39	non-TF	2.84031e-56	1.13361	0.993	0.829	3.82846e-52	SC-4
RPS23	non-TF	5.08082e-29	1.10516	0.718	0.395	6.84844e-25	SC-4
COX6C	non-TF	8.48404e-20	1.08234	0.451	0.213	1.14356e-15	SC-4
KRTCAP2	non-TF	5.77969e-09	1.0798	0.19	0.086	7.79044e-05	SC-4
ATP5ME	non-TF	1.16724e-30	1.0665	0.78	0.499	1.57333e-26	SC-4
RPL35A	non-TF	1.8788e-29	1.05987	0.777	0.486	2.53244e-25	SC-4
RPL26	non-TF	1.31988e-23	1.04735	0.689	0.428	1.77906e-19	SC-4
ATP5MD	non-TF	4.48989e-27	0.995243	0.791	0.509	6.05193e-23	SC-4
RPL37A	non-TF	1.25301e-35	0.98789	0.923	0.693	1.68893e-31	SC-4
SNRPG	non-TF	7.26803e-19	0.984511	0.59	0.345	9.79657e-15	SC-4
NOP10	non-TF	1.07854e-12	0.965081	0.326	0.157	1.45376e-08	SC-4
SNRPE	non-TF	6.72397e-11	0.962896	0.355	0.194	9.06324e-07	SC-4
COX7A2	non-TF	3.85996e-16	0.959989	0.44	0.226	5.20283e-12	SC-4
RPS13	non-TF	3.78907e-16	0.94019	0.623	0.403	5.10729e-12	SC-4
UQCRQ	non-TF	5.07209e-16	0.928198	0.601	0.395	6.83667e-12	SC-4
SEC61G	non-TF	5.41446e-20	0.923434	0.597	0.324	7.29815e-16	SC-4
TMEM258	non-TF	3.40255e-12	0.912297	0.359	0.186	4.5863e-08	SC-4
RPL21	non-TF	3.65041e-41	0.908947	0.956	0.781	4.92039e-37	SC-4
HSPE1	non-TF	4.67654e-10	0.907355	0.418	0.255	6.30351e-06	SC-4	TRUE
TXNDC17	non-TF	2.52157e-12	0.902846	0.278	0.124	3.39882e-08	SC-4
RPS28	non-TF	5.38903e-30	0.890587	0.912	0.745	7.26388e-26	SC-4
RPS29	non-TF	3.4595e-29	0.87839	0.894	0.722	4.66305e-25	SC-4
ELOB	non-TF	3.42967e-14	0.877325	0.487	0.28	4.62285e-10	SC-4
RPL36	non-TF	5.48858e-21	0.875626	0.784	0.55	7.39806e-17	SC-4
SLIRP	non-TF	1.6233e-08	0.870704	0.3	0.169	0.000218805	SC-4
S100A11	non-TF	8.79134e-28	0.869996	0.923	0.761	1.18499e-23	SC-4
RPL34	non-TF	2.94723e-22	0.860764	0.766	0.524	3.97257e-18	SC-4
RPL37	non-TF	4.17893e-26	0.840589	0.908	0.715	5.63278e-22	SC-4
NDUFA1	non-TF	5.73261e-11	0.829106	0.418	0.245	7.72698e-07	SC-4	TRUE
NDUFB1	non-TF	3.19788e-12	0.805593	0.48	0.283	4.31042e-08	SC-4	TRUE
RPS26	non-TF	6.1611e-17	0.793324	0.678	0.436	8.30455e-13	SC-4
COX5B	non-TF	8.70291e-06	0.778518	0.187	0.1	0.117307	SC-4
UBL5	non-TF	1.47041e-09	0.776039	0.403	0.247	1.98197e-05	SC-4
RPL24	non-TF	1.01372e-12	0.76988	0.535	0.319	1.36639e-08	SC-4
LRRC75A	non-TF	3.82671e-14	0.763925	0.659	0.436	5.15802e-10	SC-4
RPL30	non-TF	1.19425e-19	0.760463	0.799	0.605	1.60973e-15	SC-4
OST4	non-TF	2.13184e-16	0.759174	0.634	0.39	2.8735e-12	SC-4
NDUFS5	non-TF	2.33873e-09	0.753324	0.256	0.124	3.15237e-05	SC-4	TRUE
IMMP1L	non-TF	6.38821e-07	0.75242	0.121	0.048	0.00861067	SC-4
RPL22L1	non-TF	1.25979e-06	0.749658	0.348	0.227	0.0169807	SC-4
MINOS1	non-TF	1.39088e-07	0.73492	0.267	0.147	0.00187476	SC-4
KRT6A	non-TF	1.72099e-52	2.64927	0.263	0.045	2.31973e-48	SC-5	TRUE
SPRR2A	non-TF	1.12369e-19	1.67055	0.16	0.044	1.51462e-15	SC-5
C1orf56	non-TF	2.26442e-34	1.29677	0.501	0.226	3.05221e-30	SC-5
CDC42SE1	non-TF	4.55068e-25	1.21777	0.388	0.171	6.13386e-21	SC-5
BCL10	non-TF	2.44255e-23	1.14483	0.165	0.039	3.29231e-19	SC-5
C11orf96	non-TF	3.89394e-10	1.04305	0.133	0.05	5.24864e-06	SC-5
SFN	non-TF	6.78227e-21	0.992091	0.576	0.36	9.14182e-17	SC-5	TRUE
AL161431.1	non-TF	2.27542e-17	0.9843	0.195	0.066	3.06704e-13	SC-5
TAGLN3	non-TF	1.59321e-12	0.983269	0.175	0.069	2.14749e-08	SC-5
CLCF1	non-TF	2.53886e-12	0.982211	0.158	0.059	3.42213e-08	SC-5
SLC12A2	non-TF	1.26325e-13	0.975863	0.243	0.111	1.70273e-09	SC-5	TRUE
CTNNB1	non-TF	1.1591e-19	0.969853	0.516	0.301	1.56235e-15	SC-5	TRUE
SET	non-TF	5.44394e-34	0.964235	0.742	0.477	7.33789e-30	SC-5
HNRNPH1	non-TF	2.12814e-30	0.868549	0.797	0.591	2.86852e-26	SC-5
CTBP1	non-TF	1.79634e-15	0.865217	0.271	0.118	2.42128e-11	SC-5
SPRR2D	non-TF	3.93811e-10	0.727601	0.353	0.212	5.30818e-06	SC-5
SPRR1B	non-TF	7.15079e-18	0.7129	0.647	0.431	9.63855e-14	SC-5
HBEGF	non-TF	2.16819e-08	0.704467	0.18	0.089	0.00029225	SC-5	TRUE
MIR4435-2HG	non-TF	1.46705e-05	0.696334	0.221	0.137	0.197744	SC-5
TNFAIP3	non-TF	1.3884e-06	0.686827	0.143	0.071	0.0187142	SC-5	TRUE
MAL2	non-TF	3.25012e-09	0.685882	0.155	0.067	4.38083e-05	SC-5
ARF6	non-TF	1.56925e-12	0.680947	0.539	0.366	2.1152e-08	SC-5	TRUE
TRA2A	non-TF	5.56654e-07	0.63684	0.203	0.112	0.00750313	SC-5
PPP1R15A	non-TF	2.58295e-08	0.635465	0.306	0.185	0.000348156	SC-5
FGFR1	non-TF	3.01439e-08	0.623687	0.371	0.241	0.000406309	SC-5	TRUE
PIP5K1A	non-TF	1.7671e-07	0.623304	0.128	0.056	0.00238187	SC-5	TRUE
EIF5A	non-TF	2.36242e-09	0.617311	0.366	0.225	3.1843e-05	SC-5	TRUE
SERPINB9	non-TF	7.53352e-08	0.611041	0.15	0.069	0.00101544	SC-5
ZNHIT6	non-TF	0.000285648	0.60438	0.103	0.055	1	SC-5
CAST	non-TF	5.61812e-09	0.601166	0.386	0.247	7.57267e-05	SC-5	TRUE
ADIRF	non-TF	4.60836e-06	0.59171	0.14	0.072	0.062116	SC-5
EPHA2	non-TF	1.44494e-07	0.579513	0.118	0.049	0.00194764	SC-5	TRUE
NOG	non-TF	3.26496e-11	0.577309	0.609	0.45	4.40083e-07	SC-5
CLDN7	non-TF	1.67955e-10	0.576463	0.378	0.22	2.26386e-06	SC-5
NR1D1	TF	6.31689e-09	0.57588	0.326	0.19	8.51453e-05	SC-5	TRUE
HSPA4	non-TF	4.32705e-05	0.575041	0.158	0.092	0.583243	SC-5	TRUE
FOSL2	TF	1.50685e-05	0.561249	0.128	0.066	0.203109	SC-5
PPP3CA	non-TF	1.06519e-05	0.560781	0.286	0.187	0.143577	SC-5	TRUE
ISG20	non-TF	0.000143843	0.55387	0.145	0.085	1	SC-5
AXL	non-TF	3.75241e-06	0.543837	0.14	0.071	0.0505788	SC-5	TRUE
SNRPD1	non-TF	1.01166e-06	0.541207	0.316	0.203	0.0136361	SC-5
PPP1R2	non-TF	9.36103e-06	0.536943	0.143	0.075	0.126177	SC-5
ATP1B1	non-TF	9.43586e-10	0.534901	0.561	0.418	1.27186e-05	SC-5	TRUE
CDH11	non-TF	6.13818e-08	0.530395	0.489	0.35	0.000827366	SC-5	TRUE
BCL2L1	non-TF	1.60167e-05	0.529002	0.155	0.086	0.215889	SC-5	TRUE
E2F4	TF	9.30634e-05	0.523137	0.143	0.081	1	SC-5
CXCL8	non-TF	1.34073e-91	5.5373	0.361	0.02	1.80717e-87	ERSC	TRUE
MMP9	non-TF	1.64647e-141	4.81877	0.328	0.005	2.21928e-137	ERSC	TRUE
APOE	non-TF	2.10275e-68	3.38677	0.254	0.012	2.8343e-64	ERSC	TRUE
INHBA	non-TF	4.73018e-24	3.33947	0.238	0.04	6.37581e-20	ERSC	TRUE
EDNRB	non-TF	1.30843e-111	3.3066	0.262	0.004	1.76363e-107	ERSC	TRUE
PTX3	non-TF	8.71623e-40	3.03376	0.189	0.013	1.17486e-35	ERSC
TFPI2	non-TF	6.85095e-84	2.98618	0.189	0.002	9.2344e-80	ERSC	TRUE
THBS2	non-TF	1.50665e-90	2.79736	0.189	0.002	2.03082e-86	ERSC	TRUE
VGF	non-TF	4.41201e-32	2.79477	0.123	0.006	5.94694e-28	ERSC
GEM	non-TF	7.64116e-27	2.63639	0.32	0.067	1.02995e-22	ERSC	TRUE
BIRC3	non-TF	2.03069e-24	2.55941	0.336	0.08	2.73716e-20	ERSC	TRUE
CCL2	non-TF	2.67487e-16	2.55602	0.238	0.058	3.60546e-12	ERSC	TRUE
FTL	non-TF	2.26081e-11	2.45848	0.311	0.128	3.04734e-07	ERSC
NFKBIA	non-TF	2.41822e-19	2.35194	0.328	0.091	3.25951e-15	ERSC	TRUE
RCAN1	non-TF	4.56321e-44	2.34285	0.164	0.008	6.15075e-40	ERSC
EGR1	TF	0.00294816	2.32234	0.418	0.384	1	ERSC	TRUE
TRAF1	non-TF	1.27362e-39	2.30927	0.131	0.005	1.71671e-35	ERSC	TRUE
CDH19	non-TF	1.31859e-79	2.30507	0.148	0	1.77733e-75	ERSC
ABCA1	non-TF	1.93739e-27	2.2632	0.172	0.018	2.61141e-23	ERSC	TRUE
NR4A1	TF	1.00889e-10	2.1653	0.164	0.042	1.35989e-06	ERSC	TRUE
ICAM1	non-TF	2.28848e-23	2.13479	0.131	0.012	3.08464e-19	ERSC	TRUE
RND3	non-TF	4.29285e-18	2.10823	0.197	0.036	5.78634e-14	ERSC
PMEPA1	non-TF	3.45294e-14	2.08049	0.205	0.049	4.65422e-10	ERSC
KDM6B	non-TF	5.05211e-19	2.05849	0.246	0.053	6.80975e-15	ERSC	TRUE
NAMPT	non-TF	1.06281e-18	2.04466	0.27	0.064	1.43257e-14	ERSC	TRUE
LGALS3	non-TF	7.2299e-15	2.01828	0.262	0.075	9.74518e-11	ERSC	TRUE
IFI16	non-TF	1.98511e-50	1.96681	0.115	0.002	2.67573e-46	ERSC
ITGB8	non-TF	3.5389e-10	1.94018	0.303	0.131	4.77009e-06	ERSC	TRUE
OAF	non-TF	3.08251e-22	1.89879	0.131	0.013	4.15491e-18	ERSC
ITGB1	non-TF	1.50431e-10	1.89623	0.279	0.108	2.02766e-06	ERSC	TRUE
EGR3	TF	2.75619e-16	1.89281	0.131	0.018	3.71506e-12	ERSC
ARHGAP5	non-TF	1.1788e-09	1.84876	0.197	0.062	1.5889e-05	ERSC
MT2A	non-TF	1.21744e-05	1.82465	0.32	0.188	0.164099	ERSC	TRUE
CYLD	non-TF	3.07455e-25	1.82129	0.164	0.017	4.14419e-21	ERSC
CNKSR3	non-TF	7.82355e-13	1.78945	0.139	0.026	1.05454e-08	ERSC
SLC1A5	non-TF	9.43559e-25	1.78778	0.107	0.007	1.27182e-20	ERSC	TRUE
EGR2	TF	3.48723e-14	1.78305	0.107	0.014	4.70043e-10	ERSC	TRUE
JUN	TF	7.59864e-08	1.77681	0.475	0.314	0.00102422	ERSC	TRUE
SPRY2	non-TF	1.49363e-10	1.77681	0.27	0.1	2.01326e-06	ERSC
AP1S2	non-TF	1.60725e-10	1.76741	0.139	0.031	2.16641e-06	ERSC
ELL2	non-TF	7.8872e-14	1.7267	0.123	0.019	1.06312e-09	ERSC
TRA2B	non-TF	3.23481e-11	1.70355	0.295	0.113	4.3602e-07	ERSC
TIMP3	non-TF	4.46933e-08	1.70243	0.156	0.047	0.000602422	ERSC
GPM6B	non-TF	7.84756e-11	1.70176	0.107	0.018	1.05777e-06	ERSC
PSAP	non-TF	1.95956e-15	1.6757	0.525	0.26	2.64129e-11	ERSC
NUDT4	non-TF	1.62948e-08	1.67119	0.172	0.054	0.000219637	ERSC
FABP5	non-TF	5.07411e-07	1.64302	0.139	0.044	0.0068394	ERSC	TRUE
HSPA5	non-TF	1.99152e-09	1.63979	0.295	0.127	2.68438e-05	ERSC	TRUE
ANKRD1	non-TF	7.65803e-120	4.20557	1	0.226	1.03223e-115	SCLC
CRYAB	non-TF	6.96413e-08	1.07146	0.226	0.081	0.000938695	SCLC
DKK1	non-TF	6.3991e-06	1.02781	0.183	0.07	0.0862535	SCLC	TRUE
NDUFA12	non-TF	4.60822e-05	0.886513	0.226	0.105	0.621141	SCLC	TRUE
LAYN	non-TF	8.7991e-06	0.851632	0.304	0.149	0.118603	SCLC
FOXC1	TF	3.99204e-05	0.829877	0.122	0.041	0.538087	SCLC
SHISA9	non-TF	2.15524e-06	0.826898	0.174	0.061	0.0290505	SCLC
CYTOR	non-TF	0.00013698	0.807008	0.183	0.081	1	SCLC
COL4A2	non-TF	0.000507571	0.797778	0.313	0.187	1	SCLC	TRUE
MYO5B	non-TF	0.00117138	0.720229	0.2	0.105	1	SCLC
CCDC25	non-TF	0.000293269	0.719512	0.104	0.037	1	SCLC
CDH2	non-TF	0.000103769	0.717679	0.296	0.156	1	SCLC	TRUE
SLC15A4	non-TF	0.000175517	0.715008	0.13	0.05	1	SCLC	TRUE
SNHG12	non-TF	0.00255345	0.709938	0.174	0.091	1	SCLC
ABCF1	non-TF	0.000703537	0.696153	0.165	0.077	1	SCLC
DDX18	non-TF	0.00474368	0.666994	0.174	0.095	1	SCLC
GNPNAT1	non-TF	0.00135642	0.657061	0.139	0.063	1	SCLC
GART	non-TF	5.40714e-05	0.648627	0.157	0.06	0.728828	SCLC	TRUE
CBX6	non-TF	0.000126378	0.647256	0.383	0.222	1	SCLC
CTSV	non-TF	0.000292621	0.63598	0.391	0.238	1	SCLC	TRUE
SCD5	non-TF	0.00429538	0.634011	0.13	0.063	1	SCLC
NDUFA11	non-TF	0.00440052	0.631869	0.148	0.075	1	SCLC	TRUE
GNB2	non-TF	0.00115503	0.616713	0.139	0.062	1	SCLC
AIMP1	non-TF	0.00552467	0.615596	0.122	0.058	1	SCLC
TUFM	non-TF	0.000370527	0.611544	0.139	0.057	1	SCLC
RASAL2	non-TF	9.70559e-05	0.586259	0.278	0.138	1	SCLC
COA4	non-TF	0.00836374	0.584759	0.113	0.055	1	SCLC
TAX1BP1	TF	0.00709161	0.565816	0.157	0.083	1	SCLC
RSRP1	non-TF	0.000818936	0.558849	0.122	0.049	1	SCLC
AGPAT5	non-TF	0.0011418	0.551043	0.165	0.077	1	SCLC
SART3	non-TF	7.15029e-05	0.54548	0.113	0.037	0.963788	SCLC
CHKA	non-TF	0.00903794	0.545025	0.104	0.049	1	SCLC	TRUE
ZMYND19	non-TF	0.00425907	0.544954	0.226	0.131	1	SCLC
TAF1D	non-TF	0.00156895	0.542145	0.139	0.063	1	SCLC
PKN2	non-TF	0.00254918	0.539181	0.183	0.095	1	SCLC	TRUE
YBX1	TF	0.00309511	0.514663	0.417	0.287	1	SCLC
IL6ST	non-TF	0.00253646	0.506273	0.217	0.121	1	SCLC	TRUE
POMP	non-TF	0.000524872	0.505136	0.409	0.256	1	SCLC
BRI3	non-TF	0.00473893	0.50512	0.226	0.132	1	SCLC
SNRPD2	non-TF	0.00411583	0.504699	0.252	0.15	1	SCLC
CYCS	non-TF	0.00582041	0.499951	0.252	0.155	1	SCLC
EIF3K	non-TF	0.00442283	0.487459	0.104	0.045	1	SCLC
STAU1	non-TF	0.00722996	0.484087	0.113	0.054	1	SCLC
CDH1	non-TF	0.0011137	0.463305	0.157	0.071	1	SCLC	TRUE
UQCR10	non-TF	0.00633735	0.460693	0.278	0.176	1	SCLC	TRUE
KRT10	non-TF	0.00116672	0.450309	0.374	0.235	1	SCLC	TRUE
NDUFAB1	non-TF	0.000585207	0.44058	0.2	0.097	1	SCLC	TRUE

## Sheet: Table S6. Control vs Treated
Table S6. Differential expression analysis between control (scCtrl-1) and gentamicin-treated (scGent-2) utricle. Related to Figure 7.
Colours are matched to Figure 7e gene expression scale colours. Transcription factors (TF) were detected using AnimalTFDB 3.0, druggable targets using DGIdb 4.0.
Gene	TF	p_val	avg_log2FC	pct.1	pct.2	p_val_adj	Class	Drug
FBXO2	non-TF	0	1.0234	0.892	0.713	0	Down in Treated
S100A6	non-TF	0	1.07534	0.961	0.997	0	Down in Treated
LCN2	non-TF	0	1.98609	0.737	0.115	0	Down in Treated
FTH1	non-TF	0	2.49604	0.998	0.87	0	Down in Treated	TRUE
GSTP1	non-TF	0	1.12984	0.869	0.4	0	Down in Treated	TRUE
GAPDH	non-TF	0	1.28579	0.965	0.836	0	Down in Treated	TRUE
TPI1	non-TF	0	1.13975	0.824	0.286	0	Down in Treated
RPS19	non-TF	0	1.01839	0.922	0.648	0	Down in Treated	TRUE
FTL	non-TF	0	1.74494	0.941	0.576	0	Down in Treated
RPS27A	non-TF	1.01616e-293	0.805967	0.908	0.707	1.59415e-293	Down in Treated
SAT1	non-TF	2.1819e-293	1.13233	0.697	0.16	3.42297e-293	Down in Treated
SLPI	non-TF	5.00711e-284	1.49217	0.571	0.107	7.85515e-280	Down in Treated	TRUE
B2M	non-TF	1.69884e-283	0.854307	0.891	0.74	2.66514e-279	Down in Treated	TRUE
RPS5	non-TF	2.00031e-275	0.896384	0.708	0.131	3.13809e-271	Down in Treated
RPL21	non-TF	1.31532e-273	0.695929	0.997	0.98	2.06347e-269	Down in Treated
LGALS1	non-TF	8.8484e-261	0.974569	0.629	0.067	1.38814e-256	Down in Treated	TRUE
RPL15	non-TF	4.18342e-259	0.757148	0.89	0.624	6.56296e-255	Down in Treated
S100A11	non-TF	4.34339e-256	0.797975	0.921	0.96	6.81391e-252	Down in Treated
NMB	non-TF	2.28805e-253	1.17949	0.613	0.037	3.58949e-249	Down in Treated
MT-CO3	non-TF	1.20112e-251	0.722633	0.991	0.997	1.88431e-247	Down in Treated
UBB	non-TF	1.20434e-247	0.995601	0.664	0.173	1.88937e-243	Down in Treated
KRT19	non-TF	5.90041e-245	0.982627	0.658	0.179	9.25656e-241	Down in Treated	TRUE
WFDC2	non-TF	1.69531e-243	0.970373	0.706	0.178	2.6596e-239	Down in Treated
RPL28	non-TF	5.05688e-242	0.756179	0.903	0.728	7.93324e-238	Down in Treated
RPL10	non-TF	3.14755e-236	0.755781	0.837	0.582	4.93788e-232	Down in Treated	TRUE
IFI27	non-TF	7.32891e-233	0.952829	0.561	0.065	1.14976e-228	Down in Treated	TRUE
RPL3	non-TF	2.23198e-232	0.730987	0.859	0.613	3.50153e-228	Down in Treated
KRT18	non-TF	2.90708e-222	0.944061	0.813	0.806	4.56063e-218	Down in Treated	TRUE
LDHA	non-TF	7.66503e-220	0.803226	0.693	0.194	1.20249e-215	Down in Treated	TRUE
PSME2	non-TF	1.30306e-215	0.833214	0.59	0.051	2.04424e-211	Down in Treated	TRUE
NDUFB8	non-TF	2.33785e-215	0.796978	0.584	0.076	3.66762e-211	Down in Treated	TRUE
RPL14	non-TF	3.58423e-215	0.725675	0.826	0.457	5.62294e-211	Down in Treated
ISG20	non-TF	6.30454e-211	0.899499	0.526	0.079	9.89057e-207	Down in Treated
SERPINB1	non-TF	1.66091e-203	1.02229	0.663	0.259	2.60564e-199	Down in Treated
TIMP1	non-TF	4.31239e-202	1.25879	0.747	0.568	6.76527e-198	Down in Treated
PRDX1	non-TF	8.75751e-202	0.728425	0.776	0.444	1.37388e-197	Down in Treated	TRUE
RPL26	non-TF	1.82789e-200	0.669814	0.912	0.766	2.86759e-196	Down in Treated
HSPA5	non-TF	2.26635e-195	1.41943	0.435	0.117	3.55546e-191	Down in Treated	TRUE
RPS4X	non-TF	1.23233e-192	0.672455	0.765	0.411	1.93327e-188	Down in Treated
RPL19	non-TF	1.29352e-190	0.634335	0.892	0.676	2.02928e-186	Down in Treated
RPS9	non-TF	2.8645e-186	0.679317	0.572	0.086	4.49383e-182	Down in Treated
PRDX2	non-TF	3.00012e-183	0.67743	0.555	0.086	4.70659e-179	Down in Treated
DYNLL1	non-TF	1.30618e-168	0.679918	0.633	0.168	2.04914e-164	Down in Treated
H3F3B	non-TF	7.7764e-160	0.603304	0.948	0.844	1.21996e-155	Down in Treated
RPS15	non-TF	2.38309e-153	0.609897	0.836	0.598	3.73859e-149	Down in Treated
CCNI	non-TF	6.73477e-152	0.646181	0.565	0.141	1.05655e-147	Down in Treated
MALAT1	non-TF	2.62039e-151	0.654784	0.998	1	4.11086e-147	Down in Treated	TRUE
RACK1	non-TF	9.71559e-149	0.627479	0.832	0.526	1.52418e-144	Down in Treated
HEBP2	non-TF	2.27497e-148	0.570765	0.492	0.068	3.56898e-144	Down in Treated
MAP1B	non-TF	1.22697e-147	0.611376	0.464	0.066	1.92487e-143	Down in Treated
GPX4	non-TF	1.49783e-145	0.597903	0.573	0.139	2.34979e-141	Down in Treated
RPS18	non-TF	9.43965e-144	0.613601	0.787	0.464	1.48089e-139	Down in Treated
SERPINB6	non-TF	9.79734e-142	0.575305	0.448	0.051	1.53701e-137	Down in Treated
PFDN5	non-TF	1.27528e-138	0.554249	0.451	0.059	2.00066e-134	Down in Treated
RPL7A	non-TF	2.1396e-138	0.608222	0.795	0.466	3.3566e-134	Down in Treated
FAU	non-TF	3.14731e-137	0.585351	0.734	0.316	4.9375e-133	Down in Treated
CCL2	non-TF	2.24991e-134	0.862898	0.381	0.061	3.52966e-130	Down in Treated	TRUE
CD59	non-TF	4.41671e-134	0.629348	0.681	0.249	6.92894e-130	Down in Treated	TRUE
CSRP2	non-TF	3.89798e-132	0.551497	0.429	0.065	6.11515e-128	Down in Treated
RPL36AL	non-TF	1.97257e-130	0.587538	0.639	0.201	3.09456e-126	Down in Treated
PRDX5	non-TF	2.07924e-128	0.510298	0.44	0.057	3.2619e-124	Down in Treated	TRUE
SH3BGRL3	non-TF	4.66362e-128	0.645669	0.627	0.247	7.31629e-124	Down in Treated
RPS3A	non-TF	1.54182e-126	0.5199	0.839	0.676	2.4188e-122	Down in Treated
RPS3	non-TF	1.2904e-125	0.561196	0.631	0.201	2.02438e-121	Down in Treated
RPS7	non-TF	1.1515e-122	0.516603	0.845	0.59	1.80648e-118	Down in Treated
CTTN	non-TF	1.34831e-121	0.486978	0.427	0.068	2.11522e-117	Down in Treated
EIF1	non-TF	4.14222e-120	0.659091	0.812	0.658	6.49831e-116	Down in Treated
PSMB6	non-TF	3.75051e-119	0.479869	0.426	0.054	5.88381e-115	Down in Treated	TRUE
EGLN3	non-TF	2.04763e-118	0.516644	0.379	0.049	3.21232e-114	Down in Treated	TRUE
PARK7	non-TF	1.09176e-115	0.480133	0.475	0.093	1.71276e-111	Down in Treated
DNAJC3	non-TF	2.34682e-115	0.47714	0.391	0.039	3.6817e-111	Down in Treated
ELF3	TF	3.27576e-115	0.497613	0.393	0.059	5.13901e-111	Down in Treated
BIRC3	non-TF	6.75357e-115	0.60029	0.422	0.087	1.0595e-110	Down in Treated	TRUE
NACA	non-TF	1.96504e-114	0.549028	0.679	0.261	3.08275e-110	Down in Treated
RPS14	non-TF	3.71768e-113	0.516039	0.803	0.555	5.8323e-109	Down in Treated
RPL8	non-TF	4.73066e-110	0.530066	0.784	0.461	7.42146e-106	Down in Treated
PIGR	non-TF	1.14532e-109	0.534566	0.335	0.049	1.79677e-105	Down in Treated
SOD1	non-TF	1.28847e-109	0.491324	0.448	0.106	2.02136e-105	Down in Treated	TRUE
MYL6	non-TF	6.72347e-108	0.558522	0.756	0.351	1.05478e-103	Down in Treated
BNIP3L	non-TF	3.22685e-107	0.455554	0.36	0.039	5.06228e-103	Down in Treated
PTMA	non-TF	4.3124e-107	0.481994	0.897	0.789	6.76529e-103	Down in Treated	TRUE
EEF1D	non-TF	4.95785e-107	0.462081	0.456	0.09	7.77788e-103	Down in Treated
MT1X	non-TF	3.5153e-104	0.59717	0.325	0.067	5.51481e-100	Down in Treated
CLIC1	non-TF	8.03871e-102	0.478873	0.53	0.165	1.26111e-97	Down in Treated
RPL23	non-TF	7.41593e-99	0.525456	0.76	0.43	1.16341e-94	Down in Treated
OAZ1	non-TF	1.69422e-98	0.428452	0.423	0.09	2.65789e-94	Down in Treated
AURKAIP1	non-TF	2.55926e-97	0.405328	0.364	0.05	4.01496e-93	Down in Treated
RABAC1	non-TF	7.12364e-97	0.406719	0.345	0.041	1.11756e-92	Down in Treated
NDUFV2	non-TF	3.26452e-95	0.399815	0.375	0.064	5.12137e-91	Down in Treated	TRUE
RPL18	non-TF	5.76341e-95	0.501907	0.683	0.28	9.04164e-91	Down in Treated
CD63	non-TF	3.70314e-94	0.462692	0.874	0.815	5.80949e-90	Down in Treated	TRUE
BRK1	non-TF	7.70088e-94	0.404947	0.391	0.077	1.20811e-89	Down in Treated
H2AFZ	non-TF	1.28476e-93	0.470133	0.542	0.172	2.01553e-89	Down in Treated
DYNLT1	non-TF	4.45388e-93	0.396667	0.369	0.067	6.98724e-89	Down in Treated
CHP1	non-TF	5.78925e-93	0.401387	0.322	0.034	9.08218e-89	Down in Treated
FKBP2	non-TF	1.50156e-92	0.403366	0.379	0.066	2.35564e-88	Down in Treated
EMP3	non-TF	4.40701e-91	0.483212	0.578	0.211	6.91372e-87	Down in Treated
PFN1	non-TF	9.43741e-91	0.435203	0.499	0.15	1.48054e-86	Down in Treated
NFKBIA	non-TF	9.82756e-90	0.455794	0.39	0.08	1.54175e-85	Down in Treated	TRUE
RPL11	non-TF	5.80245e-88	0.443611	0.834	0.648	9.10288e-84	Down in Treated
PDIA3	non-TF	8.32507e-86	0.376121	0.324	0.052	1.30604e-81	Down in Treated
DDT	non-TF	9.8047e-85	0.369801	0.309	0.028	1.53816e-80	Down in Treated
SELENOM	non-TF	1.48605e-84	0.38321	0.301	0.023	2.33131e-80	Down in Treated
CDC42	non-TF	1.81616e-83	0.405103	0.404	0.103	2.8492e-79	Down in Treated	TRUE
CXCL14	non-TF	1.40006e-82	0.682683	0.195	0.022	2.19642e-78	Down in Treated
RPL29	non-TF	3.02701e-81	0.489211	0.612	0.248	4.74877e-77	Down in Treated
AGT	non-TF	8.42146e-80	0.395689	0.385	0.084	1.32116e-75	Down in Treated	TRUE
COX4I1	non-TF	6.41665e-79	0.388102	0.424	0.111	1.00664e-74	Down in Treated
CTHRC1	non-TF	3.83231e-77	0.349857	0.299	0.047	6.01213e-73	Down in Treated
COX5B	non-TF	4.06208e-77	0.371815	0.416	0.101	6.37259e-73	Down in Treated
FAM162A	non-TF	4.23601e-77	0.341065	0.3	0.045	6.64545e-73	Down in Treated
COX6A1	non-TF	1.85994e-76	0.436054	0.608	0.244	2.91788e-72	Down in Treated
B4GALT1	non-TF	2.89565e-76	0.36157	0.292	0.056	4.54269e-72	Down in Treated
NEDD8	non-TF	1.0681e-75	0.345394	0.368	0.085	1.67564e-71	Down in Treated	TRUE
DHRS3	non-TF	2.65964e-75	0.343521	0.259	0.029	4.17244e-71	Down in Treated
SDC4	non-TF	3.39438e-75	0.351458	0.338	0.071	5.3251e-71	Down in Treated
PRELID1	non-TF	6.81605e-75	0.325267	0.298	0.047	1.0693e-70	Down in Treated
APLP2	non-TF	7.21362e-75	0.349679	0.357	0.081	1.13167e-70	Down in Treated
MRPL41	non-TF	9.73913e-75	0.326085	0.285	0.04	1.52787e-70	Down in Treated
NDUFB10	non-TF	1.94218e-73	0.337411	0.345	0.077	3.04689e-69	Down in Treated	TRUE
ARRDC3	non-TF	9.60145e-73	0.320947	0.273	0.037	1.50628e-68	Down in Treated
TMEM59	non-TF	1.11462e-72	0.337038	0.328	0.068	1.74862e-68	Down in Treated
RPS10	non-TF	1.04002e-71	0.419485	0.583	0.235	1.63159e-67	Down in Treated
ATP6V0E1	non-TF	1.01866e-70	0.378135	0.464	0.145	1.59807e-66	Down in Treated
PSMB1	non-TF	1.23131e-70	0.329614	0.334	0.073	1.93168e-66	Down in Treated	TRUE
PPP1R14B	non-TF	1.71966e-69	0.372267	0.453	0.151	2.69781e-65	Down in Treated
IFNGR1	non-TF	2.19125e-69	0.332116	0.294	0.062	3.43763e-65	Down in Treated	TRUE
LMAN1	non-TF	4.09597e-68	0.309626	0.282	0.049	6.42575e-64	Down in Treated
EID1	non-TF	6.78054e-68	0.327263	0.252	0.038	1.06373e-63	Down in Treated
RPS15A	non-TF	1.72887e-67	0.430636	0.726	0.367	2.71225e-63	Down in Treated
CAPG	non-TF	5.01705e-67	0.297698	0.274	0.045	7.87074e-63	Down in Treated	TRUE
LGALS3	non-TF	1.68356e-66	0.33151	0.326	0.069	2.64117e-62	Down in Treated	TRUE
C9orf16	non-TF	7.07017e-66	0.291795	0.242	0.027	1.10917e-61	Down in Treated
SOD2	non-TF	8.37366e-66	0.563301	0.675	0.32	1.31366e-61	Down in Treated	TRUE
COX7A2	non-TF	1.95197e-65	0.396969	0.61	0.246	3.06224e-61	Down in Treated
ARPC3	non-TF	2.46636e-65	0.292313	0.274	0.055	3.86922e-61	Down in Treated
EDF1	non-TF	4.71429e-64	0.284287	0.26	0.038	7.39578e-60	Down in Treated
C4orf3	non-TF	5.00727e-64	0.370342	0.443	0.143	7.8554e-60	Down in Treated
SAA1	non-TF	1.2852e-63	1.09724	0.399	0.003	2.01622e-59	Down in Treated	TRUE
SAP18	non-TF	3.19379e-63	0.30243	0.32	0.074	5.01041e-59	Down in Treated
GTF3C6	non-TF	4.03544e-63	0.307696	0.329	0.078	6.3308e-59	Down in Treated
MGST3	non-TF	4.19383e-63	0.279382	0.237	0.028	6.57928e-59	Down in Treated
MT2A	non-TF	6.59353e-63	0.564242	0.429	0.186	1.03439e-58	Down in Treated	TRUE
CIB1	non-TF	6.91121e-63	0.277789	0.246	0.033	1.08423e-58	Down in Treated
OCIAD2	non-TF	1.27733e-62	0.366539	0.477	0.167	2.00387e-58	Down in Treated
SUMO1	non-TF	1.8068e-62	0.277398	0.251	0.039	2.83451e-58	Down in Treated	TRUE
SLC12A2	non-TF	2.62911e-62	0.376063	0.36	0.115	4.12455e-58	Down in Treated	TRUE
SEPT7	non-TF	3.27038e-62	0.30107	0.325	0.077	5.13058e-58	Down in Treated
CCDC9B	non-TF	3.31059e-61	0.289279	0.279	0.06	5.19366e-57	Down in Treated
MRPL14	non-TF	3.68381e-61	0.279302	0.252	0.04	5.77915e-57	Down in Treated
SRI	non-TF	3.97719e-61	0.271736	0.235	0.031	6.23942e-57	Down in Treated	TRUE
EIF3K	non-TF	2.01699e-60	0.272148	0.253	0.037	3.16425e-56	Down in Treated
RBP1	non-TF	2.66677e-60	0.433185	0.632	0.309	4.18362e-56	Down in Treated
TSPO	non-TF	3.05298e-60	0.296895	0.326	0.081	4.78952e-56	Down in Treated	TRUE
SERF2	non-TF	5.84921e-60	0.379372	0.754	0.508	9.17624e-56	Down in Treated
PRDX4	non-TF	7.47722e-60	0.270494	0.241	0.039	1.17303e-55	Down in Treated	TRUE
BNIP3	non-TF	5.0793e-59	0.343105	0.404	0.124	7.9684e-55	Down in Treated
PTTG1IP	non-TF	5.29621e-59	0.325323	0.404	0.13	8.30869e-55	Down in Treated
VAMP8	non-TF	2.03788e-58	0.270577	0.272	0.055	3.19702e-54	Down in Treated
MAP1LC3B	non-TF	2.13894e-58	0.286271	0.274	0.054	3.35557e-54	Down in Treated
RRBP1	non-TF	3.18535e-58	0.28504	0.293	0.065	4.99718e-54	Down in Treated
TXN	non-TF	6.48709e-58	0.455347	0.714	0.384	1.0177e-53	Down in Treated	TRUE
BRI3	non-TF	2.73744e-57	0.31749	0.381	0.113	4.29449e-53	Down in Treated
CRYAB	non-TF	2.85041e-57	0.46051	0.28	0.081	4.47173e-53	Down in Treated
GSTO1	non-TF	8.034e-57	0.257341	0.211	0.025	1.26037e-52	Down in Treated	TRUE
CHCHD2	non-TF	9.89771e-57	0.331432	0.434	0.144	1.55275e-52	Down in Treated
ARL6IP5	non-TF	1.21504e-56	0.343999	0.44	0.153	1.90615e-52	Down in Treated
DDX6	non-TF	2.51362e-56	0.264369	0.253	0.045	3.94337e-52	Down in Treated
COPS6	non-TF	4.13342e-56	0.255034	0.242	0.04	6.4845e-52	Down in Treated
PKM	non-TF	1.12764e-55	0.379836	0.813	0.656	1.76904e-51	Down in Treated	TRUE
TOR1AIP2	non-TF	1.15365e-55	0.276028	0.272	0.058	1.80985e-51	Down in Treated
ZFP36L2	TF	1.51688e-55	0.343407	0.383	0.12	2.37967e-51	Down in Treated	TRUE
TMEM165	non-TF	1.84574e-55	0.254708	0.232	0.042	2.8956e-51	Down in Treated
PSMB5	non-TF	2.97933e-55	0.257494	0.259	0.052	4.67398e-51	Down in Treated	TRUE
SPCS2	non-TF	3.25088e-55	0.307301	0.353	0.093	5.09999e-51	Down in Treated
ACADVL	non-TF	3.98913e-55	0.273928	0.299	0.076	6.25815e-51	Down in Treated
ANKRD12	non-TF	4.17489e-55	0.283733	0.303	0.079	6.54957e-51	Down in Treated
YIF1A	non-TF	5.22378e-55	0.251505	0.238	0.044	8.19506e-51	Down in Treated
CALM1	non-TF	6.63924e-55	0.373991	0.351	0.118	1.04156e-50	Down in Treated	TRUE
CLTA	non-TF	6.68345e-55	0.321195	0.413	0.134	1.0485e-50	Down in Treated
MSMO1	non-TF	6.71737e-55	0.276329	0.197	0.029	1.05382e-50	Down in Treated
NUDC	non-TF	2.79042e-54	0.25202	0.231	0.038	4.37761e-50	Down in Treated
NDUFB7	non-TF	3.38959e-54	0.273076	0.312	0.074	5.31758e-50	Down in Treated	TRUE
EEF1B2	non-TF	1.70189e-53	0.273148	0.287	0.068	2.66993e-49	Down in Treated
TMBIM6	non-TF	2.04237e-53	0.33032	0.455	0.161	3.20407e-49	Down in Treated
CAVIN3	non-TF	5.10073e-53	0.261184	0.249	0.049	8.00203e-49	Down in Treated
MLEC	non-TF	7.91106e-53	0.252975	0.217	0.036	1.24109e-48	Down in Treated
UQCRB	non-TF	8.45985e-53	0.377192	0.486	0.201	1.32718e-48	Down in Treated	TRUE
UQCRH	non-TF	1.06381e-52	0.319325	0.437	0.14	1.66891e-48	Down in Treated
SQLE	non-TF	4.45592e-52	0.263162	0.184	0.015	6.99045e-48	Down in Treated	TRUE
SSR4	non-TF	4.85912e-52	0.260161	0.26	0.052	7.62299e-48	Down in Treated
ARPC5	non-TF	4.07323e-51	0.253347	0.257	0.055	6.39008e-47	Down in Treated
SPCS1	non-TF	4.30188e-51	0.313721	0.414	0.14	6.74878e-47	Down in Treated
RAB13	non-TF	1.13029e-50	0.263259	0.287	0.074	1.7732e-46	Down in Treated
SELENOK	non-TF	1.2875e-50	0.510108	0.352	0.152	2.01982e-46	Down in Treated
ABCA5	non-TF	1.41182e-50	0.278573	0.156	0.018	2.21487e-46	Down in Treated	TRUE
ID4	TF	2.65656e-50	0.276312	0.185	0.03	4.16762e-46	Down in Treated
MARCKS	non-TF	3.19205e-50	0.343863	0.45	0.179	5.00769e-46	Down in Treated	TRUE
IRF2BPL	non-TF	3.62375e-50	0.260509	0.223	0.051	5.68493e-46	Down in Treated
RPL7	non-TF	2.90524e-49	0.341845	0.77	0.591	4.55774e-45	Down in Treated
GUK1	non-TF	6.29031e-49	0.28174	0.361	0.107	9.86824e-45	Down in Treated
SYT14	non-TF	6.35079e-49	0.286602	0.152	0.009	9.96312e-45	Down in Treated
RPL9	non-TF	1.41386e-48	0.351812	0.695	0.352	2.21806e-44	Down in Treated
CTNNA1	non-TF	4.49776e-48	0.329351	0.508	0.216	7.05609e-44	Down in Treated
GADD45GIP1	non-TF	1.26265e-47	0.291136	0.401	0.144	1.98084e-43	Down in Treated
LAPTM4A	non-TF	1.41118e-47	0.267145	0.284	0.08	2.21385e-43	Down in Treated
PLCG2	non-TF	2.38695e-47	0.272671	0.298	0.086	3.74465e-43	Down in Treated	TRUE
NDUFAB1	non-TF	2.8406e-47	0.260035	0.31	0.091	4.45633e-43	Down in Treated	TRUE
SRP14	non-TF	8.27129e-47	0.349617	0.572	0.264	1.2976e-42	Down in Treated
TPM3	non-TF	1.2292e-46	0.271999	0.343	0.107	1.92837e-42	Down in Treated	TRUE
ATP5MC1	non-TF	3.29109e-46	0.312624	0.448	0.173	5.16306e-42	Down in Treated
CUTA	non-TF	4.00901e-46	0.256004	0.281	0.074	6.28934e-42	Down in Treated
MYL12B	non-TF	5.10424e-46	0.290899	0.404	0.151	8.00753e-42	Down in Treated
PI3	non-TF	3.85529e-45	0.293954	0.129	0.007	6.04817e-41	Down in Treated	TRUE
PGAM1	non-TF	6.53707e-45	0.266063	0.335	0.107	1.02554e-40	Down in Treated
OTOL1	non-TF	3.9157e-44	0.445799	0.28	0.003	6.14295e-40	Down in Treated
DNAJA1	non-TF	1.6045e-42	0.287437	0.419	0.168	2.51714e-38	Down in Treated
H3F3A	non-TF	4.80544e-42	0.297551	0.454	0.18	7.53877e-38	Down in Treated
RPL10A	non-TF	1.62245e-41	0.268628	0.388	0.132	2.54529e-37	Down in Treated
NFIB	TF	2.12603e-41	0.26533	0.334	0.114	3.33532e-37	Down in Treated	TRUE
ATP6V1F	non-TF	6.01162e-41	0.256225	0.281	0.09	9.43104e-37	Down in Treated
SEC61B	non-TF	6.72145e-40	0.28001	0.444	0.171	1.05446e-35	Down in Treated
RPLP0	non-TF	7.84323e-40	0.327914	0.753	0.429	1.23045e-35	Down in Treated
TNFRSF12A	non-TF	5.99487e-39	0.297351	0.459	0.193	9.40475e-35	Down in Treated	TRUE
NUCKS1	non-TF	2.45572e-38	0.262154	0.327	0.125	3.85253e-34	Down in Treated
SLC25A5	non-TF	7.09429e-38	0.274911	0.404	0.158	1.11295e-33	Down in Treated	TRUE
RPL32	non-TF	7.37829e-38	0.28398	0.824	0.755	1.15751e-33	Down in Treated
RPL24	non-TF	1.90538e-37	0.32288	0.652	0.33	2.98917e-33	Down in Treated
ARPC2	non-TF	5.88853e-37	0.255472	0.389	0.151	9.23793e-33	Down in Treated
SQSTM1	non-TF	6.58e-37	0.309414	0.586	0.3	1.03227e-32	Down in Treated	TRUE
RPS6	non-TF	2.62924e-35	0.317857	0.689	0.373	4.12475e-31	Down in Treated
RPL22	non-TF	3.57779e-35	0.305352	0.689	0.387	5.61283e-31	Down in Treated
RPS13	non-TF	4.38322e-35	0.277808	0.813	0.72	6.8764e-31	Down in Treated
HSP90B1	non-TF	1.58141e-34	0.345974	0.297	0.145	2.48092e-30	Down in Treated	TRUE
ENAH	non-TF	1.61702e-33	0.253898	0.408	0.169	2.53678e-29	Down in Treated
SYNE2	non-TF	1.77372e-33	0.254044	0.332	0.12	2.78261e-29	Down in Treated
CNN3	non-TF	2.66067e-33	0.283381	0.481	0.233	4.17405e-29	Down in Treated
VIM	non-TF	7.18829e-32	0.302927	0.893	0.953	1.1277e-27	Down in Treated	TRUE
NDUFB2	non-TF	3.72567e-29	0.265305	0.585	0.292	5.84484e-25	Down in Treated	TRUE
UBA52	non-TF	4.43772e-29	0.251783	0.462	0.207	6.9619e-25	Down in Treated
RPL5	non-TF	4.84049e-28	0.254533	0.762	0.589	7.59375e-24	Down in Treated
CD9	non-TF	1.61509e-27	0.295226	0.626	0.351	2.53375e-23	Down in Treated	TRUE
MT-CYB	non-TF	3.67202e-27	0.271582	0.967	0.984	5.76067e-23	Down in Treated
HSP90AB1	non-TF	1.83341e-25	0.256805	0.771	0.668	2.87626e-21	Down in Treated	TRUE
EGR1	TF	5.51633e-25	0.38185	0.465	0.319	8.65402e-21	Down in Treated	TRUE
CSTB	non-TF	4.43958e-24	0.287263	0.653	0.4	6.96482e-20	Down in Treated
SKP1	non-TF	4.61718e-24	0.250591	0.46	0.359	7.24343e-20	Down in Treated
NEAT1	non-TF	1.7627e-23	0.28279	0.56	0.316	2.76532e-19	Down in Treated
ANXA1	non-TF	1.50795e-18	0.310713	0.678	0.59	2.36567e-14	Down in Treated	TRUE
IGFBP3	non-TF	2.58019e-15	0.276674	0.496	0.266	4.04781e-11	Down in Treated	TRUE
SAA2	non-TF	3.69254e-15	0.299078	0.149	0.001	5.79285e-11	Down in Treated
S100A14	non-TF	0	-1.75136	0.18	0.729	0	Up in Treated
RPL37	non-TF	0	-1.01708	0.559	0.874	0	Up in Treated
CMYA5	non-TF	0	-1.81198	0.154	0.721	0	Up in Treated
CD99	non-TF	0	-1.39133	0.154	0.618	0	Up in Treated
RPL41	non-TF	0	-0.81165	0.973	0.996	0	Up in Treated
RPS29	non-TF	0	-1.35336	0.391	0.756	0	Up in Treated
ATP5F1E	non-TF	0	-1.01421	0.691	0.937	0	Up in Treated	TRUE
MT-CO1	non-TF	0	-0.78647	0.985	1	0	Up in Treated	TRUE
MT-ND3	non-TF	0	-1.72106	0.758	0.997	0	Up in Treated	TRUE
ACTB	non-TF	4.62143e-282	-0.90542	0.615	0.928	7.25011e-278	Up in Treated	TRUE
MT-ND4	non-TF	2.87899e-277	-0.832672	0.967	0.998	4.51656e-273	Up in Treated	TRUE
PABPC1	non-TF	7.85424e-273	-1.03716	0.187	0.607	1.23217e-268	Up in Treated	TRUE
TMSB4X	non-TF	3.25421e-229	-0.938061	0.463	0.726	5.10521e-225	Up in Treated
CFL1	non-TF	5.05173e-222	-0.898876	0.22	0.563	7.92515e-218	Up in Treated	TRUE
S100A1	non-TF	6.68203e-211	-0.863686	0.342	0.769	1.04828e-206	Up in Treated
ATP5ME	non-TF	1.08817e-181	-0.838037	0.273	0.538	1.70712e-177	Up in Treated
CTGF	non-TF	2.37583e-178	-1.14167	0.258	0.522	3.72721e-174	Up in Treated
TIMM17A	non-TF	1.01713e-175	-0.773365	0.108	0.457	1.59568e-171	Up in Treated
EIF4A1	non-TF	8.56546e-150	-0.697648	0.078	0.4	1.34375e-145	Up in Treated	TRUE
KRT8	non-TF	3.91646e-149	-0.739486	0.389	0.612	6.14414e-145	Up in Treated
ACTN4	non-TF	1.22343e-148	-0.695456	0.241	0.502	1.91931e-144	Up in Treated
RPS21	non-TF	3.45538e-144	-0.734844	0.426	0.597	5.42079e-140	Up in Treated
MT-ND4L	non-TF	4.55667e-144	-0.738756	0.336	0.57	7.14851e-140	Up in Treated	TRUE
ATP5MD	non-TF	1.83321e-138	-0.692429	0.351	0.548	2.87594e-134	Up in Treated
DDX21	non-TF	1.34663e-134	-0.64445	0.092	0.38	2.11259e-130	Up in Treated
RPL39	non-TF	2.31304e-132	-0.592647	0.913	0.978	3.6287e-128	Up in Treated
TMA7	non-TF	1.65729e-131	-0.674566	0.452	0.607	2.59995e-127	Up in Treated
ARF6	non-TF	3.36533e-128	-0.635057	0.109	0.377	5.27954e-124	Up in Treated	TRUE
CDH11	non-TF	1.02969e-126	-0.649421	0.046	0.35	1.61538e-122	Up in Treated	TRUE
LMO4	non-TF	3.33238e-123	-0.689545	0.275	0.488	5.22783e-119	Up in Treated
RPS28	non-TF	1.64484e-122	-0.56189	0.838	0.94	2.58042e-118	Up in Treated
ANKRD1	non-TF	9.32719e-120	-0.871065	0.041	0.269	1.46325e-115	Up in Treated
SPOCD1	non-TF	6.5367e-118	-0.621347	0.207	0.432	1.02548e-113	Up in Treated
TPBG	non-TF	3.06377e-117	-0.627059	0.086	0.324	4.80644e-113	Up in Treated	TRUE
SNHG9	non-TF	3.38903e-117	-0.660877	0.03	0.348	5.31671e-113	Up in Treated
NOG	non-TF	6.46717e-117	-0.631383	0.143	0.384	1.01457e-112	Up in Treated
ANXA2	non-TF	1.14245e-115	-0.507262	0.839	0.961	1.79228e-111	Up in Treated	TRUE
WASF2	non-TF	3.68678e-114	-0.600218	0.209	0.427	5.78382e-110	Up in Treated
RPL31	non-TF	2.11901e-113	-0.551154	0.665	0.812	3.3243e-109	Up in Treated
COX17	non-TF	5.91277e-112	-0.642508	0.569	0.644	9.27596e-108	Up in Treated
RPL4	non-TF	8.58592e-112	-0.591334	0.208	0.432	1.34696e-107	Up in Treated
ZFP36	non-TF	9.60456e-110	-0.543392	0.055	0.321	1.50676e-105	Up in Treated
RPS12	non-TF	2.99291e-109	-0.512567	0.855	0.96	4.69528e-105	Up in Treated
RPS27	non-TF	1.23434e-104	-0.519276	0.841	0.952	1.93643e-100	Up in Treated
EMP1	non-TF	1.5348e-104	-0.602142	0.253	0.438	2.4078e-100	Up in Treated	TRUE
SFN	non-TF	6.71127e-104	-0.616821	0.126	0.342	1.05286e-99	Up in Treated	TRUE
SNHG8	non-TF	2.17377e-102	-0.52065	0.048	0.3	3.41021e-98	Up in Treated
TMSB10	non-TF	1.15713e-99	-0.621602	0.485	0.629	1.8153e-95	Up in Treated	TRUE
TBCA	non-TF	2.83826e-96	-0.568572	0.38	0.517	4.45267e-92	Up in Treated
RPL37A	non-TF	3.22483e-92	-0.487493	0.764	0.899	5.05911e-88	Up in Treated
ROMO1	non-TF	2.26637e-90	-0.541193	0.329	0.491	3.55548e-86	Up in Treated
ITM2B	non-TF	3.18407e-89	-0.596367	0.307	0.466	4.99517e-85	Up in Treated
RPL35	non-TF	4.60018e-85	-0.467098	0.755	0.884	7.21676e-81	Up in Treated
ACTG1	non-TF	1.91681e-82	-0.494244	0.688	0.8	3.0071e-78	Up in Treated	TRUE
DUSP6	non-TF	8.77606e-81	-0.471271	0.15	0.333	1.37679e-76	Up in Treated	TRUE
EIF3J	non-TF	5.72847e-79	-0.439926	0.11	0.3	8.98683e-75	Up in Treated
TRIR	non-TF	7.81693e-73	-0.446479	0.202	0.352	1.22632e-68	Up in Treated
SLC38A2	non-TF	2.87866e-71	-0.412923	0.137	0.31	4.51605e-67	Up in Treated	TRUE
ATN1	non-TF	3.98928e-71	-0.405496	0.02	0.236	6.25838e-67	Up in Treated
SMCR5	non-TF	6.73165e-71	-0.386866	0.068	0.243	1.05606e-66	Up in Treated
NPM3	non-TF	2.3382e-70	-0.378229	0.045	0.222	3.66817e-66	Up in Treated
EEF2	non-TF	1.20101e-69	-0.418608	0.187	0.347	1.88414e-65	Up in Treated	TRUE
B4GALT5	non-TF	4.19441e-69	-0.369538	0.066	0.243	6.5802e-65	Up in Treated
HNRNPH1	non-TF	8.51831e-68	-0.538443	0.372	0.533	1.33635e-63	Up in Treated
EIF2S2	non-TF	6.82428e-66	-0.42534	0.249	0.389	1.07059e-61	Up in Treated
TOMM5	non-TF	1.44423e-61	-0.344633	0.078	0.237	2.26571e-57	Up in Treated
NMT1	non-TF	6.24159e-61	-0.352012	0.105	0.258	9.79181e-57	Up in Treated
C8orf59	non-TF	4.4798e-60	-0.390655	0.173	0.3	7.02792e-56	Up in Treated
RPL38	non-TF	1.74835e-59	-0.437033	0.373	0.46	2.74281e-55	Up in Treated
COL4A2	non-TF	3.46037e-59	-0.319832	0.031	0.191	5.42863e-55	Up in Treated	TRUE
TPT1	non-TF	1.35775e-57	-0.396481	0.716	0.809	2.13004e-53	Up in Treated	TRUE
PABPC4	non-TF	1.81148e-56	-0.293897	0.034	0.193	2.84184e-52	Up in Treated
NDUFB1	non-TF	3.95313e-56	-0.385702	0.187	0.309	6.20167e-52	Up in Treated	TRUE
NR1D1	TF	7.14197e-56	-0.309923	0.048	0.194	1.12043e-51	Up in Treated	TRUE
SMIM37	non-TF	1.49561e-55	-0.321937	0.092	0.242	2.34631e-51	Up in Treated
SPRR1B	non-TF	2.22279e-55	-0.483187	0.341	0.465	3.48711e-51	Up in Treated
HMGA1	TF	6.30182e-55	-0.419804	0.338	0.442	9.88629e-51	Up in Treated
EIF5B	non-TF	1.76098e-54	-0.360246	0.193	0.328	2.76263e-50	Up in Treated
FZD7	non-TF	1.68588e-52	-0.281791	0.035	0.179	2.64481e-48	Up in Treated	TRUE
RPL36A	non-TF	2.5664e-51	-0.337209	0.151	0.278	4.02616e-47	Up in Treated
GPN1	non-TF	3.13097e-51	-0.277282	0.05	0.191	4.91187e-47	Up in Treated
MIR4435-2HG	non-TF	2.06622e-50	-0.301472	0.019	0.154	3.24148e-46	Up in Treated
CLPTM1L	non-TF	7.284e-50	-0.272981	0.047	0.183	1.14271e-45	Up in Treated
CYB5R2	non-TF	6.21343e-49	-0.339706	0.167	0.289	9.74763e-45	Up in Treated	TRUE
CBX3	non-TF	6.252e-49	-0.33528	0.209	0.323	9.80814e-45	Up in Treated
ZYX	non-TF	5.48282e-48	-0.27132	0.066	0.202	8.60145e-44	Up in Treated
FLOT1	non-TF	3.93845e-47	-0.276609	0.067	0.195	6.17864e-43	Up in Treated
KLHL21	non-TF	1.52334e-46	-0.261107	0.048	0.181	2.38981e-42	Up in Treated
MRPL33	non-TF	7.30676e-46	-0.323667	0.183	0.291	1.14628e-41	Up in Treated
HIST1H4C	non-TF	1.96691e-43	-0.429342	0.403	0.467	3.08569e-39	Up in Treated
S100A2	non-TF	5.04426e-43	-0.489574	0.695	0.855	7.91343e-39	Up in Treated	TRUE
ZFAS1	non-TF	1.884e-40	-0.27628	0.079	0.19	2.95562e-36	Up in Treated
MTRNR2L12	non-TF	1.60888e-39	-0.314588	0.127	0.241	2.52402e-35	Up in Treated
DDX5	non-TF	4.77452e-39	-0.309123	0.204	0.306	7.49027e-35	Up in Treated	TRUE
SPRR2D	non-TF	3.0269e-38	-0.296111	0.114	0.218	4.7486e-34	Up in Treated
PCBP1	non-TF	4.65995e-38	-0.312697	0.279	0.353	7.31053e-34	Up in Treated
MT-ND2	non-TF	2.98626e-37	-0.359345	0.849	0.97	4.68484e-33	Up in Treated	TRUE
COMMD6	non-TF	1.35669e-36	-0.316556	0.304	0.363	2.12838e-32	Up in Treated
MYOF	non-TF	1.34382e-35	-0.258792	0.13	0.237	2.10818e-31	Up in Treated
RPL22L1	non-TF	9.44625e-35	-0.26093	0.129	0.23	1.48193e-30	Up in Treated
MT-ND1	non-TF	1.86491e-34	-0.308915	0.837	0.95	2.92567e-30	Up in Treated	TRUE
SERPINE2	non-TF	4.11561e-32	-0.305806	0.202	0.276	6.45657e-28	Up in Treated
EIF1AX	non-TF	2.87999e-31	-0.270418	0.211	0.277	4.51813e-27	Up in Treated
IGFBP5	non-TF	7.62535e-31	-0.421375	0.29	0.358	1.19626e-26	Up in Treated	TRUE
NDRG1	non-TF	2.31542e-29	-0.260143	0.167	0.252	3.63243e-25	Up in Treated
RPS26	non-TF	6.48575e-29	-0.302807	0.459	0.457	1.01748e-24	Up in Treated
SNRPG	non-TF	2.27472e-28	-0.275335	0.352	0.366	3.56858e-24	Up in Treated
RPL18A	non-TF	1.06028e-27	-0.277113	0.45	0.448	1.66337e-23	Up in Treated
PPIA	non-TF	1.88879e-27	-0.2521	0.229	0.296	2.96313e-23	Up in Treated	TRUE
RPL30	non-TF	5.27027e-27	-0.250422	0.81	0.855	8.268e-23	Up in Treated
LRRC75A	non-TF	1.5222e-25	-0.332122	0.271	0.37	2.38803e-21	Up in Treated
UQCR11	non-TF	3.0904e-23	-0.250071	0.336	0.36	4.84821e-19	Up in Treated
RPS20	non-TF	1.13405e-22	-0.25938	0.516	0.482	1.7791e-18	Up in Treated
XIST	non-TF	5.83426e-21	-0.275878	0.002	0.157	9.15279e-17	Up in Treated

## Sheet: Table S6. ERSC vs SC
Table S6. Differential expression analysis between Early-Responding Supporting Cells (ERSC) and Supporting Cells (SC) clusters from gentamicin-treated utricle (scGent-2). Wilcoxon rank-sum test, with a Bonferroni Padj < .05. Related to Figure 8b.
Transcription factors (TF) were detected using AnimalTFDB 3.0, druggable targets using DGIdb 4.0. Genes used for STRING analysis (Figure 8e) are listed.
Gene	TF	p_val	avg_log2FC	pct.1	pct.2	p_val_adj	Class	Drug	Used for STRING analysis
CXCL8	non-TF	2.91102e-89	5.52508	0.361	0.019	3.92376e-85	Up in ERSC	TRUE	TRUE
MMP9	non-TF	1.26015e-134	4.8184	0.328	0.005	1.69855e-130	Up in ERSC	TRUE	TRUE
APOE	non-TF	5.18319e-74	3.41591	0.254	0.01	6.98642e-70	Up in ERSC	TRUE	TRUE
INHBA	non-TF	1.98909e-23	3.31971	0.238	0.04	2.68109e-19	Up in ERSC	TRUE
EDNRB	non-TF	8.81591e-107	3.31774	0.262	0.004	1.1883e-102	Up in ERSC	TRUE	TRUE
PTX3	non-TF	2.003e-38	3.02622	0.189	0.013	2.69984e-34	Up in ERSC
TFPI2	non-TF	3.43772e-78	2.98217	0.189	0.003	4.6337e-74	Up in ERSC	TRUE
VGF	non-TF	1.91855e-33	2.8229	0.123	0.005	2.58602e-29	Up in ERSC		TRUE
THBS2	non-TF	1.99191e-84	2.79508	0.189	0.002	2.6849e-80	Up in ERSC	TRUE	TRUE
C11orf96	non-TF	2.46851e-34	2.72288	0.32	0.051	3.3273e-30	Up in ERSC
GEM	non-TF	1.4592e-26	2.63381	0.32	0.067	1.96686e-22	Up in ERSC	TRUE
CCL2	non-TF	1.54302e-16	2.58079	0.238	0.056	2.07983e-12	Up in ERSC	TRUE
BIRC3	non-TF	4.04377e-24	2.54777	0.336	0.08	5.45059e-20	Up in ERSC	TRUE	TRUE
FTL	non-TF	2.19948e-11	2.45271	0.311	0.127	2.96468e-07	Up in ERSC
RCAN1	non-TF	2.20791e-43	2.34961	0.164	0.008	2.97605e-39	Up in ERSC
NFKBIA	non-TF	4.04933e-19	2.33308	0.328	0.091	5.45809e-15	Up in ERSC	TRUE	TRUE
CDH19	non-TF	2.81031e-74	2.30475	0.148	0	3.78802e-70	Up in ERSC
EGR1	TF	0.00342949	2.30357	0.418	0.385	1	Up in ERSC	TRUE	TRUE
TRAF1	non-TF	7.42231e-37	2.30152	0.131	0.005	1.00045e-32	Up in ERSC	TRUE	TRUE
ABCA1	non-TF	8.01144e-26	2.24782	0.172	0.019	1.07986e-21	Up in ERSC	TRUE
NR4A1	TF	4.17315e-11	2.18071	0.164	0.04	5.62499e-07	Up in ERSC	TRUE
ICAM1	non-TF	3.25422e-22	2.13122	0.131	0.012	4.38636e-18	Up in ERSC	TRUE
RND3	non-TF	5.95626e-18	2.09158	0.197	0.036	8.02845e-14	Up in ERSC
PMEPA1	non-TF	1.09647e-13	2.06876	0.205	0.051	1.47793e-09	Up in ERSC
KDM6B	non-TF	1.3967e-18	2.05085	0.246	0.054	1.88261e-14	Up in ERSC	TRUE
NAMPT	non-TF	5.30654e-19	2.04523	0.27	0.063	7.15269e-15	Up in ERSC	TRUE
LGALS3	non-TF	1.75451e-14	1.99405	0.262	0.076	2.3649e-10	Up in ERSC	TRUE	TRUE
IFI16	non-TF	5.59296e-50	1.96756	0.115	0.001	7.53875e-46	Up in ERSC
ITGB8	non-TF	3.77718e-10	1.93605	0.303	0.131	5.09126e-06	Up in ERSC	TRUE	TRUE
OAF	non-TF	3.39988e-22	1.89593	0.131	0.012	4.5827e-18	Up in ERSC
ITGB1	non-TF	1.21181e-10	1.89156	0.279	0.107	1.6334e-06	Up in ERSC	TRUE	TRUE
CYLD	non-TF	6.51183e-27	1.8884	0.164	0.016	8.7773e-23	Up in ERSC
EGR3	TF	1.2783e-15	1.87711	0.131	0.019	1.72302e-11	Up in ERSC		TRUE
SLC1A5	non-TF	2.91771e-28	1.83868	0.107	0.005	3.93278e-24	Up in ERSC	TRUE
MT2A	non-TF	9.698e-06	1.82925	0.32	0.186	0.130719	Up in ERSC	TRUE
PPP1R15A	non-TF	5.0655e-19	1.8283	0.475	0.185	6.82779e-15	Up in ERSC
ARHGAP5	non-TF	2.5717e-09	1.82242	0.197	0.064	3.46639e-05	Up in ERSC
EGR2	TF	1.47445e-14	1.79248	0.107	0.013	1.98741e-10	Up in ERSC	TRUE	TRUE
SPRY2	non-TF	1.06188e-10	1.78905	0.27	0.099	1.43131e-06	Up in ERSC
CNKSR3	non-TF	9.30403e-13	1.78708	0.139	0.026	1.25409e-08	Up in ERSC
AP1S2	non-TF	1.64688e-10	1.78162	0.139	0.031	2.21983e-06	Up in ERSC
JUN	TF	1.13603e-07	1.75705	0.475	0.316	0.00153126	Up in ERSC	TRUE	TRUE
ELL2	non-TF	3.01523e-13	1.71308	0.123	0.019	4.06422e-09	Up in ERSC
TIMP3	non-TF	3.60079e-08	1.71187	0.156	0.047	0.00048535	Up in ERSC		TRUE
TRA2B	non-TF	2.82272e-11	1.70911	0.295	0.112	3.80474e-07	Up in ERSC
GPM6B	non-TF	7.1689e-11	1.70323	0.107	0.018	9.66297e-07	Up in ERSC
HSPA5	non-TF	8.66048e-10	1.66996	0.295	0.123	1.16735e-05	Up in ERSC	TRUE
NUDT4	non-TF	1.75775e-08	1.66205	0.172	0.054	0.000236927	Up in ERSC
PSAP	non-TF	3.9221e-15	1.6534	0.525	0.262	5.2866e-11	Up in ERSC
HIST1H4C	non-TF	0.0015993	1.6345	0.492	0.454	1	Up in ERSC
GADD45B	non-TF	2.28952e-09	1.63101	0.139	0.034	3.08605e-05	Up in ERSC
ARID5B	TF	4.82227e-09	1.6238	0.164	0.047	6.49993e-05	Up in ERSC	TRUE
FABP5	non-TF	1.40758e-06	1.61731	0.139	0.046	0.0189727	Up in ERSC	TRUE
CSRNP1	TF	7.35498e-11	1.61412	0.18	0.047	9.91378e-07	Up in ERSC
PPP6R3	non-TF	1.47631e-08	1.58981	0.115	0.026	0.000198992	Up in ERSC
JUND	TF	1.77182e-08	1.57921	0.41	0.234	0.000238824	Up in ERSC	TRUE	TRUE
BTG1	non-TF	2.65388e-11	1.57253	0.344	0.146	3.57717e-07	Up in ERSC
CEBPB	TF	5.80783e-10	1.57216	0.115	0.023	7.82837e-06	Up in ERSC		TRUE
TCEAL9	non-TF	1.67608e-06	1.56147	0.32	0.177	0.0225919	Up in ERSC
DDIT3	TF	1.09389e-12	1.54438	0.156	0.032	1.47446e-08	Up in ERSC	TRUE
CREB5	TF	4.85913e-09	1.51496	0.107	0.021	6.54962e-05	Up in ERSC
CTSL	non-TF	0.00206071	1.4867	0.131	0.065	1	Up in ERSC	TRUE
AMOTL1	non-TF	2.59597e-06	1.47901	0.131	0.043	0.034991	Up in ERSC
FTH1	non-TF	0.00696575	1.47082	0.508	0.47	1	Up in ERSC	TRUE	TRUE
PLAT	non-TF	1.83981e-13	1.4563	0.107	0.014	2.47988e-09	Up in ERSC	TRUE
GAP43	non-TF	1.56318e-08	1.45349	0.262	0.106	0.000210701	Up in ERSC
NFKB1	TF	2.31437e-07	1.41753	0.131	0.038	0.00311953	Up in ERSC	TRUE	TRUE
CDKN1A	non-TF	1.20921e-05	1.41643	0.18	0.075	0.162989	Up in ERSC	TRUE	TRUE
RELB	TF	1.72031e-06	1.4155	0.197	0.079	0.023188	Up in ERSC
TRA2A	non-TF	1.01378e-06	1.41431	0.254	0.12	0.0136648	Up in ERSC
SELENOK	non-TF	0.000314702	1.40293	0.238	0.137	1	Up in ERSC
HSP90B1	non-TF	3.32573e-06	1.39452	0.287	0.15	0.0448275	Up in ERSC	TRUE
BHLHE41	TF	2.6319e-07	1.38444	0.131	0.037	0.00354753	Up in ERSC
SERTAD1	non-TF	1.57535e-06	1.38379	0.115	0.033	0.0212342	Up in ERSC
SEC24A	non-TF	1.06576e-06	1.37099	0.107	0.028	0.0143653	Up in ERSC
RHOB	non-TF	1.45244e-05	1.35275	0.115	0.038	0.195774	Up in ERSC	TRUE
DUSP1	non-TF	4.62659e-07	1.35229	0.189	0.069	0.00623618	Up in ERSC	TRUE
CREG1	non-TF	2.42066e-06	1.33964	0.123	0.038	0.0326281	Up in ERSC
TNFAIP3	non-TF	6.20532e-05	1.33691	0.172	0.077	0.836415	Up in ERSC	TRUE
PTPRZ1	non-TF	0.000179332	1.32281	0.107	0.039	1	Up in ERSC	TRUE
BUD31	non-TF	4.18702e-05	1.32038	0.115	0.04	0.564369	Up in ERSC
HNRNPH3	non-TF	1.87872e-06	1.31943	0.172	0.064	0.0253233	Up in ERSC
GLUL	non-TF	1.69796e-05	1.31716	0.123	0.042	0.228868	Up in ERSC
UBA2	non-TF	4.3635e-07	1.30142	0.156	0.051	0.00588157	Up in ERSC	TRUE
AHI1	non-TF	0.000168361	1.27581	0.139	0.059	1	Up in ERSC
EIF5	non-TF	1.30161e-05	1.27293	0.27	0.146	0.175444	Up in ERSC
CD44	non-TF	4.02502e-05	1.26617	0.27	0.154	0.542533	Up in ERSC	TRUE	TRUE
BEX3	non-TF	0.000618952	1.26309	0.156	0.075	1	Up in ERSC
RSRC2	non-TF	9.05309e-08	1.24805	0.205	0.074	0.00122027	Up in ERSC
PIM3	non-TF	0.000125474	1.22728	0.131	0.053	1	Up in ERSC	TRUE
ZFAS1	non-TF	2.06888e-05	1.22659	0.311	0.18	0.278864	Up in ERSC
PHLDA1	non-TF	0.006263	1.21404	0.189	0.118	1	Up in ERSC
ETS1	TF	1.45333e-06	1.20873	0.172	0.063	0.0195894	Up in ERSC
HBEGF	non-TF	5.68026e-07	1.1838	0.23	0.095	0.00765643	Up in ERSC	TRUE	TRUE
MORF4L2	non-TF	0.000567932	1.14366	0.123	0.052	1	Up in ERSC
PELI1	non-TF	8.6823e-07	1.12702	0.107	0.027	0.0117029	Up in ERSC
C16orf72	non-TF	6.31428e-07	1.08917	0.139	0.042	0.00851101	Up in ERSC
SOX10	TF	0.00624786	1.08894	0.115	0.058	1	Up in ERSC	TRUE	TRUE
PFKFB3	non-TF	0.00186279	1.07284	0.107	0.046	1	Up in ERSC	TRUE
ASAP1	non-TF	3.83015e-05	1.06917	0.107	0.035	0.516266	Up in ERSC
PNRC1	non-TF	0.00201293	1.06856	0.205	0.119	1	Up in ERSC
ACSL3	non-TF	0.000767435	1.06543	0.148	0.07	1	Up in ERSC
DDX24	non-TF	0.00445949	1.05939	0.139	0.073	1	Up in ERSC
SRSF5	non-TF	0.00283849	1.04968	0.115	0.052	1	Up in ERSC
DCBLD2	non-TF	0.00760909	1.0417	0.139	0.078	1	Up in ERSC
FOSL1	TF	0.00750557	1.03939	0.27	0.192	1	Up in ERSC	TRUE	TRUE
FNDC3A	non-TF	0.00277173	1.03889	0.107	0.048	1	Up in ERSC
SGK1	non-TF	0.00200053	1.03458	0.27	0.176	1	Up in ERSC	TRUE
SLC2A1	non-TF	0.00455371	1.02718	0.164	0.091	1	Up in ERSC	TRUE
CLIC4	non-TF	0.000521567	1.01342	0.107	0.042	1	Up in ERSC
MCL1	non-TF	0.00227981	0.99661	0.262	0.172	1	Up in ERSC	TRUE
ZFAND5	non-TF	3.13873e-05	0.995549	0.139	0.052	0.423069	Up in ERSC
UBL3	non-TF	0.00034058	0.992692	0.107	0.04	1	Up in ERSC
USP53	non-TF	0.00216507	0.978201	0.115	0.051	1	Up in ERSC
BCLAF1	TF	0.00197266	0.969391	0.123	0.057	1	Up in ERSC
JUNB	TF	0.00505645	0.962053	0.213	0.134	1	Up in ERSC	TRUE	TRUE
PEA15	non-TF	0.00707446	0.936364	0.238	0.162	1	Up in ERSC
SPAG9	non-TF	0.00353767	0.913806	0.115	0.054	1	Up in ERSC
CLK1	non-TF	0.00102605	0.912008	0.107	0.043	1	Up in ERSC	TRUE
SRSF3	non-TF	0.00756492	0.892113	0.32	0.242	1	Up in ERSC
SON	TF	0.0023567	0.861096	0.336	0.248	1	Up in ERSC
RPS6KA3	non-TF	0.00952969	0.8599	0.164	0.097	1	Up in ERSC	TRUE
UBE2D3	non-TF	0.00217417	0.848876	0.262	0.167	1	Up in ERSC
MAFF	TF	5.38576e-05	0.841997	0.131	0.048	0.725947	Up in ERSC
NRIP1	non-TF	0.00611929	0.832553	0.115	0.056	1	Up in ERSC	TRUE
CALU	non-TF	0.00442211	0.806279	0.164	0.092	1	Up in ERSC	TRUE
YTHDC1	non-TF	0.00893268	0.754084	0.115	0.059	1	Up in ERSC
B2M	non-TF	0.00283612	0.739291	0.516	0.45	1	Up in ERSC	TRUE
CAV1	non-TF	0.00349416	0.695271	0.123	0.059	1	Up in ERSC	TRUE
RBM39	non-TF	0.0085432	0.680664	0.156	0.088	1	Up in ERSC
RTN4	non-TF	0.000808307	0.668855	0.434	0.332	1	Up in ERSC	TRUE
MT-ND1	non-TF	0.00964036	0.322034	0.836	0.814	1	Up in ERSC	TRUE
RPL39	non-TF	0.00172292	-0.267984	0.697	0.853	1	Down in ERSC
RPL37A	non-TF	0.00771588	-0.287236	0.566	0.724	1	Down in ERSC
MT-ND4L	non-TF	0.00796253	-0.288215	0.418	0.595	1	Down in ERSC	TRUE
YBX1	TF	0.00987198	-0.290581	0.164	0.295	1	Down in ERSC
DDX21	non-TF	0.00404205	-0.295567	0.238	0.398	1	Down in ERSC
SPOCD1	non-TF	0.00288206	-0.310134	0.295	0.472	1	Down in ERSC
RPS6	non-TF	0.00435122	-0.318429	0.246	0.424	1	Down in ERSC
SPARC	non-TF	0.00906687	-0.331089	0.115	0.231	1	Down in ERSC	TRUE
EIF5A	non-TF	0.00967643	-0.335209	0.131	0.248	1	Down in ERSC	TRUE
ENO1	non-TF	0.00783459	-0.338762	0.287	0.452	1	Down in ERSC
RPS28	non-TF	0.00662912	-0.345257	0.639	0.764	1	Down in ERSC
EMP1	non-TF	0.00790097	-0.356007	0.32	0.481	1	Down in ERSC	TRUE
RPS26	non-TF	0.00379798	-0.357853	0.295	0.467	1	Down in ERSC
ITM2B	non-TF	0.00819168	-0.358233	0.369	0.509	1	Down in ERSC
RPS24	non-TF	0.00156443	-0.359842	0.352	0.539	1	Down in ERSC
CD63	non-TF	0.00030246	-0.367239	0.434	0.635	1	Down in ERSC	TRUE
RPL23A	non-TF	0.00990151	-0.388281	0.295	0.446	1	Down in ERSC
EIF2S2	non-TF	0.00305596	-0.407158	0.238	0.396	1	Down in ERSC
RPL27A	non-TF	0.0033878	-0.408924	0.23	0.394	1	Down in ERSC
TXN	non-TF	0.00169058	-0.410589	0.23	0.396	1	Down in ERSC	TRUE
RPL32	non-TF	0.00795271	-0.425345	0.361	0.527	1	Down in ERSC
WASF2	non-TF	0.00044303	-0.426937	0.262	0.469	1	Down in ERSC
RPS11	non-TF	0.00470334	-0.431309	0.189	0.324	1	Down in ERSC
LARP1	non-TF	0.00760143	-0.432791	0.066	0.161	1	Down in ERSC
RASGRP1	non-TF	0.00621438	-0.438364	0.033	0.115	1	Down in ERSC	TRUE
PA2G4	non-TF	0.002059	-0.442891	0.09	0.214	1	Down in ERSC
NDFIP1	non-TF	0.00894949	-0.44644	0.057	0.145	1	Down in ERSC
RPL27	non-TF	0.00305285	-0.456951	0.23	0.398	1	Down in ERSC
TUBB	non-TF	0.00507823	-0.465459	0.139	0.26	1	Down in ERSC	TRUE
RPS8	non-TF	0.000478712	-0.470406	0.377	0.601	1	Down in ERSC
TMA7	non-TF	0.00179396	-0.474474	0.418	0.584	1	Down in ERSC
SLC38A2	non-TF	0.0064754	-0.494684	0.205	0.341	1	Down in ERSC	TRUE
HSPB1	non-TF	0.000668161	-0.501705	0.082	0.211	1	Down in ERSC	TRUE
MALAT1	non-TF	3.21461e-10	-0.503534	0.959	0.981	4.33298e-06	Down in ERSC	TRUE
KCNK1	non-TF	0.00811724	-0.503808	0.115	0.225	1	Down in ERSC
PFN1	non-TF	0.0032541	-0.511876	0.082	0.195	1	Down in ERSC
TRIM25	non-TF	0.00214587	-0.512279	0.082	0.201	1	Down in ERSC
ACTG1	non-TF	8.78969e-06	-0.513247	0.475	0.707	0.118476	Down in ERSC	TRUE
FKBP4	non-TF	0.00659703	-0.515358	0.066	0.164	1	Down in ERSC	TRUE
LMNA	non-TF	0.00340266	-0.524628	0.148	0.285	1	Down in ERSC	TRUE
RPS7	non-TF	0.00042757	-0.528458	0.246	0.425	1	Down in ERSC
VDAC1	non-TF	0.00911344	-0.531345	0.09	0.188	1	Down in ERSC	TRUE
TUBA1B	non-TF	0.00155841	-0.534367	0.197	0.348	1	Down in ERSC	TRUE
LDHA	non-TF	0.00866156	-0.536643	0.115	0.223	1	Down in ERSC	TRUE
RPLP1	non-TF	7.32711e-07	-0.538205	0.672	0.849	0.00987621	Down in ERSC
CD24	non-TF	0.00546296	-0.539005	0.082	0.187	1	Down in ERSC
SNHG8	non-TF	0.00936869	-0.541821	0.18	0.299	1	Down in ERSC
ZYX	non-TF	0.00174307	-0.547379	0.107	0.239	1	Down in ERSC
RPL4	non-TF	0.00018565	-0.550484	0.279	0.481	1	Down in ERSC
RPL3	non-TF	0.00630352	-0.550814	0.172	0.299	1	Down in ERSC
RPL26	non-TF	0.00151941	-0.554873	0.303	0.458	1	Down in ERSC
CAPNS1	non-TF	0.00241826	-0.558509	0.066	0.18	1	Down in ERSC
SLIRP	non-TF	0.00136323	-0.563035	0.066	0.186	1	Down in ERSC
RACK1	non-TF	0.000100798	-0.566555	0.27	0.486	1	Down in ERSC
RPLP0	non-TF	0.000329865	-0.568316	0.27	0.472	1	Down in ERSC
RPL41	non-TF	3.66706e-10	-0.571621	0.828	0.936	4.94283e-06	Down in ERSC
RPL38	non-TF	0.00292664	-0.572012	0.295	0.453	1	Down in ERSC
CLPTM1L	non-TF	0.00298489	-0.584108	0.082	0.198	1	Down in ERSC
RWDD1	non-TF	0.00208679	-0.587457	0.041	0.142	1	Down in ERSC
WDR1	non-TF	0.00865901	-0.58819	0.074	0.166	1	Down in ERSC
UGP2	non-TF	0.00857227	-0.594433	0.041	0.12	1	Down in ERSC
DSP	non-TF	0.00775833	-0.594974	0.074	0.172	1	Down in ERSC	TRUE
CFL1	non-TF	0.000625451	-0.602337	0.402	0.58	1	Down in ERSC	TRUE
PPP1R14B	non-TF	0.00265888	-0.609954	0.09	0.208	1	Down in ERSC
RPL12	non-TF	0.000123494	-0.609964	0.262	0.457	1	Down in ERSC
ATP5MG	non-TF	0.00144606	-0.612501	0.148	0.294	1	Down in ERSC
RPL34	non-TF	1.14005e-05	-0.614137	0.303	0.554	0.153668	Down in ERSC
RPS19	non-TF	0.00263582	-0.614149	0.205	0.353	1	Down in ERSC	TRUE
TMSB4X	non-TF	3.78675e-09	-0.61755	0.443	0.747	5.10417e-05	Down in ERSC
ATP5F1E	non-TF	4.77473e-07	-0.629987	0.566	0.79	0.00643586	Down in ERSC	TRUE
WWTR1	non-TF	0.00215793	-0.630965	0.098	0.227	1	Down in ERSC
GSTP1	non-TF	0.00104721	-0.64484	0.066	0.19	1	Down in ERSC	TRUE
OST4	non-TF	0.000106352	-0.65288	0.23	0.417	1	Down in ERSC
AAK1	non-TF	0.00951268	-0.657203	0.057	0.143	1	Down in ERSC	TRUE
PKM	non-TF	1.63306e-05	-0.659447	0.369	0.621	0.22012	Down in ERSC	TRUE
TOMM7	non-TF	0.000236447	-0.662239	0.139	0.313	1	Down in ERSC
GALNT10	non-TF	0.00625267	-0.668094	0.025	0.102	1	Down in ERSC
COPS9	non-TF	0.000776309	-0.670662	0.148	0.298	1	Down in ERSC
RPL5	non-TF	0.000249954	-0.675677	0.279	0.457	1	Down in ERSC
CYB5R3	non-TF	0.00209338	-0.676092	0.066	0.176	1	Down in ERSC	TRUE
BRIP1	non-TF	0.00636458	-0.682241	0.025	0.102	1	Down in ERSC
IRF2BP2	non-TF	0.00887638	-0.682989	0.074	0.163	1	Down in ERSC
CAST	non-TF	0.00367473	-0.683325	0.148	0.273	1	Down in ERSC	TRUE
CCT6A	non-TF	0.00987624	-0.685113	0.074	0.164	1	Down in ERSC
GRHPR	non-TF	0.00939269	-0.688434	0.041	0.119	1	Down in ERSC
RPS21	non-TF	1.36605e-05	-0.696944	0.361	0.596	0.18413	Down in ERSC
COX20	non-TF	0.000575729	-0.697991	0.139	0.297	1	Down in ERSC
ACTN4	non-TF	1.13544e-05	-0.698563	0.295	0.54	0.153046	Down in ERSC
ODC1	non-TF	0.00735575	-0.706839	0.066	0.158	1	Down in ERSC	TRUE
TRIR	non-TF	0.000124005	-0.707411	0.213	0.405	1	Down in ERSC
ITGA2	non-TF	1.18718e-05	-0.707458	0.213	0.445	0.16002	Down in ERSC	TRUE
ATP5ME	non-TF	1.95351e-05	-0.719438	0.303	0.539	0.263314	Down in ERSC
SNHG9	non-TF	4.5685e-05	-0.731404	0.156	0.355	0.615788	Down in ERSC
CBX6	non-TF	0.00441732	-0.732297	0.115	0.228	1	Down in ERSC
MYOF	non-TF	0.000522443	-0.735309	0.115	0.263	1	Down in ERSC
RPS27L	non-TF	1.91923e-05	-0.738633	0.139	0.35	0.258693	Down in ERSC
SLC12A2	non-TF	0.00379684	-0.74044	0.041	0.134	1	Down in ERSC	TRUE
SH3BGRL3	non-TF	0.000672875	-0.740932	0.148	0.293	1	Down in ERSC
SERBP1	non-TF	0.000172999	-0.745894	0.098	0.266	1	Down in ERSC
RAP1GAP2	non-TF	0.00414941	-0.746802	0.033	0.121	1	Down in ERSC
MT-ATP8	non-TF	0.00319413	-0.755839	0.09	0.201	1	Down in ERSC
GOLIM4	non-TF	0.00223997	-0.756116	0.066	0.177	1	Down in ERSC
SEPT9	non-TF	0.00166568	-0.75879	0.066	0.182	1	Down in ERSC
RPS20	non-TF	3.88034e-05	-0.759491	0.262	0.477	0.52303	Down in ERSC
PSMD14	non-TF	0.00413667	-0.761241	0.098	0.207	1	Down in ERSC	TRUE
RPL13A	non-TF	3.21129e-06	-0.762753	0.295	0.544	0.043285	Down in ERSC
NFIC	TF	0.00241623	-0.762858	0.057	0.163	1	Down in ERSC
CLIC1	non-TF	0.00997239	-0.76422	0.098	0.19	1	Down in ERSC
NFIB	TF	0.00421971	-0.766089	0.041	0.133	1	Down in ERSC	TRUE
SLC38A1	non-TF	0.0048318	-0.772507	0.066	0.164	1	Down in ERSC	TRUE
SMCR5	non-TF	0.000809115	-0.773682	0.107	0.25	1	Down in ERSC
NDUFB2	non-TF	0.000604168	-0.784972	0.139	0.295	1	Down in ERSC	TRUE
MRPL20	non-TF	0.00180341	-0.788568	0.057	0.167	1	Down in ERSC
COL4A2	non-TF	0.00423841	-0.791751	0.09	0.193	1	Down in ERSC	TRUE
MRPL33	non-TF	4.88922e-05	-0.808827	0.115	0.3	0.659018	Down in ERSC
LIMA1	non-TF	0.000911379	-0.82022	0.131	0.271	1	Down in ERSC
ANKRD1	non-TF	0.000619408	-0.822958	0.098	0.236	1	Down in ERSC
COMMD6	non-TF	1.42432e-05	-0.823843	0.156	0.367	0.191984	Down in ERSC
PDCD5	non-TF	0.000443038	-0.824661	0.123	0.271	1	Down in ERSC
AGRN	non-TF	0.00204443	-0.831798	0.025	0.117	1	Down in ERSC
NHP2	non-TF	0.00112624	-0.832137	0.049	0.161	1	Down in ERSC
SUMO2	non-TF	0.00199307	-0.84859	0.066	0.177	1	Down in ERSC	TRUE
ATP5MC2	non-TF	2.02355e-05	-0.852666	0.148	0.346	0.272754	Down in ERSC
ATP5MC1	non-TF	0.00438362	-0.853682	0.082	0.185	1	Down in ERSC
BOLA2B	non-TF	0.00521999	-0.854516	0.057	0.15	1	Down in ERSC
HINT1	non-TF	1.71903e-06	-0.859204	0.197	0.439	0.0231708	Down in ERSC	TRUE
FZD7	non-TF	0.00433076	-0.860524	0.09	0.195	1	Down in ERSC	TRUE
RPL31	non-TF	6.05806e-09	-0.860792	0.443	0.708	8.16566e-05	Down in ERSC
RPL37	non-TF	5.74765e-10	-0.861429	0.443	0.748	7.74726e-06	Down in ERSC
ZFP36	non-TF	2.23378e-05	-0.863834	0.172	0.37	0.301092	Down in ERSC
CEBPD	TF	2.10079e-07	-0.869749	0.369	0.604	0.00283165	Down in ERSC
CHST1	non-TF	0.00565292	-0.877243	0.025	0.102	1	Down in ERSC	TRUE
KARS	non-TF	0.00542099	-0.878147	0.041	0.126	1	Down in ERSC
PYURF	non-TF	0.00355903	-0.880327	0.025	0.109	1	Down in ERSC
ATP5MD	non-TF	3.02384e-06	-0.882082	0.311	0.546	0.0407584	Down in ERSC
METTL7B	non-TF	0.00192361	-0.883476	0.025	0.117	1	Down in ERSC
RPS12	non-TF	3.53006e-11	-0.886885	0.557	0.806	4.75817e-07	Down in ERSC
TXNDC17	non-TF	0.00357763	-0.889784	0.049	0.145	1	Down in ERSC
NDUFB1	non-TF	0.000149603	-0.890318	0.139	0.31	1	Down in ERSC	TRUE
PPP3CA	non-TF	5.84936e-05	-0.901779	0.057	0.213	0.788435	Down in ERSC	TRUE
GSPT1	non-TF	0.00912316	-0.906067	0.033	0.106	1	Down in ERSC
TRIM47	non-TF	0.0017073	-0.912644	0.049	0.155	1	Down in ERSC
SORBS2	non-TF	0.00247121	-0.913505	0.016	0.101	1	Down in ERSC
AHNAK	non-TF	0.00309764	-0.916734	0.049	0.145	1	Down in ERSC
COX17	non-TF	2.82604e-09	-0.922721	0.344	0.631	3.80922e-05	Down in ERSC
GOLGA8A	non-TF	0.0019556	-0.924238	0.033	0.13	1	Down in ERSC
DGKE	non-TF	0.00510857	-0.92622	0.025	0.103	1	Down in ERSC
MET	non-TF	0.00477857	-0.929216	0.025	0.103	1	Down in ERSC	TRUE
ANAPC16	non-TF	0.00151269	-0.933149	0.016	0.107	1	Down in ERSC
DLG5	non-TF	0.00651654	-0.934463	0.033	0.111	1	Down in ERSC	TRUE
CDH11	non-TF	1.21297e-06	-0.935595	0.148	0.382	0.0163496	Down in ERSC	TRUE
SLPI	non-TF	0.00324026	-0.938396	0.033	0.124	1	Down in ERSC	TRUE
BCL2L1	non-TF	0.00523421	-0.940065	0.025	0.102	1	Down in ERSC	TRUE
TOMM22	non-TF	0.000695268	-0.942276	0.033	0.145	1	Down in ERSC
RPS29	non-TF	5.43976e-10	-0.944362	0.459	0.749	7.33226e-06	Down in ERSC
PTTG1IP	non-TF	0.00648337	-0.950546	0.066	0.154	1	Down in ERSC
MZT2B	non-TF	0.00179521	-0.956201	0.033	0.13	1	Down in ERSC
PARK7	non-TF	0.00170722	-0.961044	0.016	0.106	1	Down in ERSC
IFITM3	non-TF	3.45525e-10	-0.962312	0.352	0.678	4.65733e-06	Down in ERSC
COL17A1	non-TF	0.0010636	-0.962541	0.041	0.15	1	Down in ERSC
EIF3G	non-TF	0.00531818	-0.970937	0.033	0.113	1	Down in ERSC
BRI3	non-TF	0.00510786	-0.971873	0.049	0.137	1	Down in ERSC
KLHDC10	non-TF	0.00117727	-0.985076	0.025	0.123	1	Down in ERSC
S100A11	non-TF	2.26456e-12	-0.986272	0.467	0.799	3.0524e-08	Down in ERSC
CTSV	non-TF	8.02866e-05	-0.986666	0.082	0.249	1	Down in ERSC	TRUE
ENAH	non-TF	0.000325773	-0.987542	0.057	0.189	1	Down in ERSC
SMIM37	non-TF	0.000137111	-0.997459	0.082	0.236	1	Down in ERSC
ROMO1	non-TF	3.25313e-08	-1.00304	0.197	0.49	0.00043849	Down in ERSC
LMO4	non-TF	9.38483e-07	-1.00477	0.246	0.489	0.0126498	Down in ERSC
GAS1	non-TF	0.00201053	-1.01232	0.041	0.139	1	Down in ERSC
TRABD2B	non-TF	0.00047064	-1.01416	0.016	0.123	1	Down in ERSC
SET	non-TF	4.08749e-08	-1.01642	0.254	0.53	0.000550952	Down in ERSC
IMPDH2	non-TF	0.00230539	-1.01694	0.025	0.113	1	Down in ERSC	TRUE
ANXA3	non-TF	0.00159879	-1.02611	0.016	0.106	1	Down in ERSC
CSTB	non-TF	1.8951e-07	-1.02739	0.172	0.429	0.00255441	Down in ERSC
TIMM8B	non-TF	0.000121082	-1.03472	0.074	0.224	1	Down in ERSC
SFN	non-TF	0.00016831	-1.03684	0.23	0.402	1	Down in ERSC	TRUE
PTMS	non-TF	0.00475566	-1.03701	0.049	0.137	1	Down in ERSC
NDUFC1	non-TF	2.5773e-05	-1.05364	0.123	0.3	0.347394	Down in ERSC	TRUE
ICMT	non-TF	0.00087245	-1.05849	0.025	0.126	1	Down in ERSC	TRUE
KRT19	non-TF	0.000338909	-1.06124	0.09	0.231	1	Down in ERSC	TRUE
SLC1A3	non-TF	0.00288148	-1.06704	0.025	0.11	1	Down in ERSC	TRUE
LDHB	non-TF	9.27741e-05	-1.06832	0.049	0.196	1	Down in ERSC
MIA	non-TF	0.00105506	-1.06915	0.066	0.182	1	Down in ERSC	TRUE
NME1	non-TF	0.00072131	-1.07353	0.008	0.102	1	Down in ERSC	TRUE
RDH10	non-TF	0.00051144	-1.07526	0.057	0.181	1	Down in ERSC
NFE2L1	TF	0.00361216	-1.07631	0.025	0.106	1	Down in ERSC
PRR34-AS1	non-TF	0.000473771	-1.08309	0.033	0.149	1	Down in ERSC
ATP5MF	non-TF	0.000233272	-1.09563	0.066	0.205	1	Down in ERSC
EPCAM	non-TF	8.82265e-05	-1.09766	0.098	0.257	1	Down in ERSC	TRUE
TSPAN3	non-TF	1.74192e-06	-1.10037	0.123	0.343	0.0234794	Down in ERSC
SLC12A7	non-TF	0.000321345	-1.1008	0.049	0.177	1	Down in ERSC	TRUE
RPL18A	non-TF	1.46419e-08	-1.10347	0.27	0.554	0.000197358	Down in ERSC
LRRC8D	non-TF	0.000831695	-1.11363	0.016	0.114	1	Down in ERSC
CDH2	non-TF	0.000350526	-1.11582	0.041	0.163	1	Down in ERSC	TRUE
CRIM1	non-TF	0.00284535	-1.11657	0.049	0.144	1	Down in ERSC
IGFBP6	non-TF	0.00046666	-1.12013	0.057	0.184	1	Down in ERSC	TRUE
TMSB10	non-TF	1.29138e-10	-1.12059	0.352	0.646	1.74066e-06	Down in ERSC	TRUE
SYTL2	non-TF	0.00177137	-1.12318	0.025	0.115	1	Down in ERSC
DDR1	non-TF	2.87819e-05	-1.12708	0.049	0.21	0.387952	Down in ERSC	TRUE
UQCRQ	non-TF	3.25983e-07	-1.1315	0.164	0.417	0.00439392	Down in ERSC
TSPAN13	non-TF	0.00174847	-1.1573	0.016	0.104	1	Down in ERSC
MIAT	non-TF	0.000512154	-1.15756	0.041	0.158	1	Down in ERSC
LAMB3	non-TF	8.19817e-07	-1.15778	0.172	0.398	0.0110503	Down in ERSC	TRUE
ATP5F1D	non-TF	0.00094054	-1.16737	0.016	0.113	1	Down in ERSC	TRUE
PRDX2	non-TF	0.000399337	-1.16852	0.008	0.11	1	Down in ERSC
TINAGL1	non-TF	0.000664369	-1.17041	0.016	0.117	1	Down in ERSC
CCT3	non-TF	0.000167512	-1.17718	0.025	0.149	1	Down in ERSC
NPM3	non-TF	4.51959e-05	-1.18025	0.066	0.226	0.609196	Down in ERSC
CBX3	non-TF	1.3025e-06	-1.1837	0.139	0.358	0.0175564	Down in ERSC
TUBB4B	non-TF	4.10402e-06	-1.18623	0.107	0.307	0.0553181	Down in ERSC	TRUE
SNU13	non-TF	0.000153058	-1.19553	0.025	0.15	1	Down in ERSC
CD9	non-TF	3.86514e-06	-1.20153	0.148	0.355	0.0520982	Down in ERSC	TRUE
ATP5IF1	non-TF	0.00032182	-1.20684	0.016	0.126	1	Down in ERSC
UQCR11	non-TF	1.33796e-07	-1.21268	0.107	0.359	0.00180344	Down in ERSC
IFITM2	non-TF	0.00019826	-1.21756	0.025	0.146	1	Down in ERSC
SELENOW	non-TF	2.6948e-05	-1.22135	0.049	0.211	0.363233	Down in ERSC
ANXA2	non-TF	9.71744e-21	-1.22661	0.533	0.86	1.30981e-16	Down in ERSC	TRUE
RPL36	non-TF	6.03164e-11	-1.23901	0.254	0.588	8.13004e-07	Down in ERSC
ARL4C	non-TF	2.95515e-05	-1.25311	0.082	0.249	0.398325	Down in ERSC
NOP56	non-TF	0.000708895	-1.26553	0.033	0.14	1	Down in ERSC
FAAP20	non-TF	0.000177988	-1.27059	0.041	0.171	1	Down in ERSC
GSN	non-TF	3.00466e-08	-1.28988	0.107	0.366	0.000404998	Down in ERSC
MYH14	non-TF	0.000132573	-1.29159	0.057	0.196	1	Down in ERSC	TRUE
TMBIM1	non-TF	0.00106396	-1.29323	0.033	0.133	1	Down in ERSC
CAPN2	non-TF	1.3438e-07	-1.30725	0.172	0.41	0.00181131	Down in ERSC	TRUE
MGST1	non-TF	0.000604848	-1.33973	0.016	0.117	1	Down in ERSC
ABHD2	non-TF	4.48231e-06	-1.33974	0.066	0.253	0.0604171	Down in ERSC
PLS1	non-TF	9.39957e-05	-1.3502	0.008	0.128	1	Down in ERSC
CASP3	non-TF	0.000161363	-1.35102	0.016	0.134	1	Down in ERSC	TRUE
RGS4	non-TF	1.02843e-05	-1.35308	0.098	0.28	0.138622	Down in ERSC	TRUE
BOLA3	non-TF	3.1156e-06	-1.39562	0.049	0.236	0.0419952	Down in ERSC
SPRR1B	non-TF	1.79997e-13	-1.40975	0.107	0.488	2.42618e-09	Down in ERSC
LAYN	non-TF	0.000173302	-1.4106	0.033	0.157	1	Down in ERSC
SPRR2D	non-TF	1.69943e-06	-1.41707	0.049	0.245	0.0229066	Down in ERSC
RPL35	non-TF	1.62081e-16	-1.42386	0.32	0.705	2.18469e-12	Down in ERSC
C4orf48	non-TF	3.74937e-06	-1.44562	0.066	0.248	0.0505378	Down in ERSC
AGT	non-TF	0.000497036	-1.47295	0.008	0.106	1	Down in ERSC	TRUE
SPINT1	non-TF	2.86751e-05	-1.50324	0.016	0.155	0.386512	Down in ERSC	TRUE
SIX1	TF	0.000156906	-1.50809	0	0.106	1	Down in ERSC
CAPN1	non-TF	8.68201e-05	-1.51917	0.016	0.141	1	Down in ERSC	TRUE
IGFBP5	non-TF	1.15865e-07	-1.52281	0.164	0.412	0.00156174	Down in ERSC	TRUE
FXYD3	non-TF	0.000181644	-1.53449	0.025	0.143	1	Down in ERSC
RBP1	non-TF	8.26804e-10	-1.55173	0.082	0.371	1.11445e-05	Down in ERSC
SPINT2	non-TF	2.87563e-05	-1.61397	0.008	0.141	0.387607	Down in ERSC
MEST	non-TF	1.29964e-06	-1.62879	0.057	0.25	0.0175178	Down in ERSC
CHST6	non-TF	2.69396e-06	-1.63895	0.041	0.219	0.0363119	Down in ERSC
LCN2	non-TF	0.000113915	-1.6479	0.025	0.151	1	Down in ERSC
TPBG	non-TF	1.88383e-08	-1.69633	0.09	0.34	0.000253921	Down in ERSC	TRUE
ITGB4	non-TF	2.67109e-05	-1.69737	0.008	0.142	0.360037	Down in ERSC
LTBP3	non-TF	1.45426e-06	-1.76821	0.057	0.243	0.0196019	Down in ERSC
PRSS23	non-TF	3.85836e-09	-1.78315	0.082	0.34	5.20068e-05	Down in ERSC
LRRC75A	non-TF	1.03122e-12	-1.80105	0.131	0.476	1.38998e-08	Down in ERSC
CLDN7	non-TF	1.82258e-07	-1.85012	0.049	0.257	0.00245665	Down in ERSC
CST3	non-TF	5.53536e-12	-1.86389	0.074	0.397	7.46112e-08	Down in ERSC	TRUE
SERPINB1	non-TF	5.04079e-09	-1.92779	0.057	0.308	6.79448e-05	Down in ERSC
ATP1B1	non-TF	1.56215e-12	-1.93552	0.115	0.447	2.10562e-08	Down in ERSC	TRUE
IGFBP3	non-TF	5.55557e-08	-1.9426	0.066	0.297	0.000748835	Down in ERSC	TRUE
CMYA5	non-TF	3.4763e-25	-1.99825	0.295	0.757	4.68571e-21	Down in ERSC
SCNN1A	non-TF	1.7445e-07	-2.06483	0.008	0.201	0.00235141	Down in ERSC	TRUE
S100A13	non-TF	1.4293e-13	-2.06882	0.066	0.422	1.92656e-09	Down in ERSC
FBXO2	non-TF	3.90795e-10	-2.08296	0.041	0.313	5.26752e-06	Down in ERSC
WFDC2	non-TF	1.61508e-08	-2.0901	0.016	0.241	0.000217696	Down in ERSC
KRT18	non-TF	4.85175e-22	-2.15341	0.139	0.627	6.53967e-18	Down in ERSC	TRUE
GFAP	non-TF	2.62516e-12	-2.20801	0.066	0.38	3.53845e-08	Down in ERSC	TRUE
S100A10	non-TF	6.3207e-55	-2.2116	0.475	0.981	8.51968e-51	Down in ERSC	TRUE
S100A2	non-TF	2.49968e-25	-2.23284	0.27	0.755	3.36932e-21	Down in ERSC	TRUE
SLC34A2	non-TF	1.75262e-15	-2.29197	0.123	0.495	2.36236e-11	Down in ERSC	TRUE
CD99	non-TF	1.63132e-24	-2.38321	0.221	0.689	2.19886e-20	Down in ERSC
ANXA1	non-TF	3.96723e-23	-2.42316	0.131	0.625	5.34743e-19	Down in ERSC	TRUE
S100A1	non-TF	1.80884e-19	-2.42858	0.107	0.55	2.43814e-15	Down in ERSC
CTGF	non-TF	1.55704e-17	-2.46739	0.164	0.56	2.09874e-13	Down in ERSC
S100A14	non-TF	9.91802e-33	-2.46878	0.172	0.769	1.33685e-28	Down in ERSC
KRT8	non-TF	1.03881e-28	-2.59099	0.156	0.692	1.40021e-24	Down in ERSC
NOG	non-TF	5.77959e-20	-2.99808	0.057	0.499	7.79031e-16	Down in ERSC

## Sheet: Table S6. ERSC vs SCLC
Table S6. Differential expression analysis between Early-Responding Supporting Cells (ERSC) and SC-like cells (SCLC) clusters from gentamicin-treated utricle (scGent-2). Wilcoxon rank-sum test, with a Bonferroni Padj < .05. Related to Figure 8d.
Transcription factors (TF) were detected using AnimalTFDB 3.0, druggable genes using DGIdb 4.0.
Gene	TF	p_val	avg_log2FC	pct.1	pct.2	p_val_adj	Class	Drug
CXCL8	non-TF	5.26522e-11	5.67571	0.361	0.026	7.09699e-07	Up in ERSC	TRUE
MMP9	non-TF	8.24071e-11	4.76175	0.328	0.009	1.11077e-06	Up in ERSC	TRUE
INHBA	non-TF	3.71294e-06	3.67246	0.238	0.035	0.0500467	Up in ERSC	TRUE
EDNRB	non-TF	2.12313e-08	3.04787	0.262	0.009	0.000286177	Up in ERSC	TRUE
TFPI2	non-TF	1.06414e-06	3.04171	0.189	0	0.0143436	Up in ERSC	TRUE
PTX3	non-TF	1.46179e-05	3.0413	0.189	0.017	0.197035	Up in ERSC
THBS2	non-TF	1.06414e-06	2.82874	0.189	0	0.0143436	Up in ERSC	TRUE
APOE	non-TF	3.99958e-05	2.80491	0.254	0.07	0.539104	Up in ERSC	TRUE
C11orf96	non-TF	4.56058e-07	2.73184	0.32	0.07	0.00614721	Up in ERSC
GAP43	non-TF	5.52063e-07	2.64603	0.262	0.035	0.00744125	Up in ERSC
FTL	non-TF	0.000162223	2.64406	0.311	0.139	1	Up in ERSC
VGF	non-TF	0.00157086	2.54021	0.123	0.017	1	Up in ERSC
BIRC3	non-TF	1.37417e-06	2.47493	0.336	0.096	0.0185224	Up in ERSC	TRUE
GEM	non-TF	2.2397e-06	2.44169	0.32	0.087	0.030189	Up in ERSC	TRUE
ABCA1	non-TF	1.44992e-05	2.43206	0.172	0.009	0.195435	Up in ERSC	TRUE
TRAF1	non-TF	6.12999e-05	2.41877	0.131	0	0.826261	Up in ERSC	TRUE
FABP5	non-TF	0.000135887	2.37265	0.139	0.009	1	Up in ERSC	TRUE
CDH19	non-TF	1.95891e-05	2.30938	0.148	0	0.264042	Up in ERSC
NFKBIA	non-TF	8.1259e-05	2.28502	0.328	0.139	1	Up in ERSC	TRUE
RND3	non-TF	0.000406306	2.2409	0.197	0.052	1	Up in ERSC
RCAN1	non-TF	9.64532e-05	2.13568	0.164	0.017	1	Up in ERSC
LGALS3	non-TF	0.000199429	2.10011	0.262	0.096	1	Up in ERSC	TRUE
ARHGAP5	non-TF	0.000896601	2.09702	0.197	0.061	1	Up in ERSC
ICAM1	non-TF	0.000293415	2.06925	0.131	0.009	1	Up in ERSC	TRUE
EGR3	TF	0.000822694	2.05803	0.131	0.017	1	Up in ERSC
PMEPA1	non-TF	0.000131786	2.05126	0.205	0.043	1	Up in ERSC
CYLD	non-TF	2.695e-05	2.04395	0.164	0.009	0.363259	Up in ERSC
NR4A1	TF	0.00818488	1.96234	0.164	0.061	1	Up in ERSC	TRUE
PSAP	non-TF	1.51924e-07	1.94188	0.525	0.261	0.00204778	Up in ERSC
IFI16	non-TF	0.000748557	1.92906	0.115	0.009	1	Up in ERSC
NUDT4	non-TF	0.000990059	1.92571	0.172	0.043	1	Up in ERSC
GPM6B	non-TF	0.0041594	1.91237	0.107	0.017	1	Up in ERSC
NAMPT	non-TF	0.000352238	1.90176	0.27	0.104	1	Up in ERSC	TRUE
KDM6B	non-TF	0.000110832	1.88693	0.246	0.07	1	Up in ERSC	TRUE
JUN	TF	0.000551808	1.87692	0.475	0.348	1	Up in ERSC	TRUE
CCL2	non-TF	0.00288387	1.8732	0.238	0.104	1	Up in ERSC	TRUE
RPS6KA3	non-TF	0.000714628	1.86288	0.164	0.035	1	Up in ERSC	TRUE
ELL2	non-TF	0.00148183	1.84084	0.123	0.017	1	Up in ERSC
OAF	non-TF	0.0023543	1.84057	0.131	0.026	1	Up in ERSC
CNKSR3	non-TF	0.0033416	1.82038	0.139	0.035	1	Up in ERSC
PFKFB3	non-TF	0.00133553	1.80363	0.107	0.009	1	Up in ERSC	TRUE
JUND	TF	3.36176e-05	1.76049	0.41	0.2	0.453132	Up in ERSC	TRUE
PPP6R3	non-TF	0.0025784	1.7356	0.115	0.017	1	Up in ERSC
SLC1A5	non-TF	0.00133553	1.72023	0.107	0.009	1	Up in ERSC	TRUE
TRA2B	non-TF	0.000252538	1.71656	0.295	0.122	1	Up in ERSC
ITGB8	non-TF	0.00337711	1.70905	0.303	0.183	1	Up in ERSC	TRUE
BTG1	non-TF	3.6715e-05	1.70709	0.344	0.139	0.494882	Up in ERSC
ACSL3	non-TF	0.00218861	1.65226	0.148	0.035	1	Up in ERSC
ETS1	TF	0.00214959	1.64036	0.172	0.052	1	Up in ERSC
CSRNP1	TF	0.00168877	1.63761	0.18	0.052	1	Up in ERSC
DDIT3	TF	0.000505942	1.62461	0.156	0.026	1	Up in ERSC	TRUE
SGK1	non-TF	0.00103252	1.62208	0.27	0.113	1	Up in ERSC	TRUE
HNRNPH3	non-TF	0.00810488	1.62082	0.172	0.07	1	Up in ERSC
TRA2A	non-TF	0.00172787	1.61917	0.254	0.113	1	Up in ERSC
IER3	non-TF	0.00430585	1.61257	0.418	0.322	1	Up in ERSC
BCLAF1	TF	0.00394147	1.59877	0.123	0.026	1	Up in ERSC
SLC2A1	non-TF	0.00488347	1.56715	0.164	0.052	1	Up in ERSC	TRUE
CREB5	TF	0.00506412	1.51787	0.107	0.017	1	Up in ERSC
SERTAD1	non-TF	0.0029322	1.46984	0.115	0.017	1	Up in ERSC
UBA2	non-TF	0.0069971	1.46653	0.156	0.052	1	Up in ERSC	TRUE
PIM3	non-TF	0.00686157	1.39929	0.131	0.035	1	Up in ERSC	TRUE
ZFAND5	non-TF	0.00155845	1.36532	0.139	0.026	1	Up in ERSC
AHI1	non-TF	0.00406727	1.25896	0.139	0.035	1	Up in ERSC
PPP1R15A	non-TF	0.00132457	1.09437	0.475	0.339	1	Up in ERSC
RPS27A	non-TF	0.00444168	-0.27346	0.262	0.504	1	Down in ERSC
RPL9	non-TF	0.00571184	-0.311814	0.246	0.47	1	Down in ERSC
RPS17	non-TF	0.00705355	-0.3144	0.18	0.365	1	Down in ERSC
PRKDC	non-TF	0.00776494	-0.334652	0.115	0.27	1	Down in ERSC	TRUE
TIMM17A	non-TF	0.00511516	-0.335769	0.303	0.53	1	Down in ERSC
CLTA	non-TF	0.00693005	-0.405097	0.082	0.217	1	Down in ERSC
RPLP2	non-TF	0.00703677	-0.408799	0.475	0.704	1	Down in ERSC
MALAT1	non-TF	2.71887e-06	-0.418022	0.959	0.991	0.0366476	Down in ERSC	TRUE
PKM	non-TF	0.00767058	-0.432009	0.369	0.626	1	Down in ERSC	TRUE
S100A6	non-TF	0.00544196	-0.434132	0.877	0.983	1	Down in ERSC
RPS18	non-TF	0.00134319	-0.437982	0.205	0.443	1	Down in ERSC
TXN	non-TF	0.00360157	-0.439288	0.23	0.435	1	Down in ERSC	TRUE
RPL39	non-TF	0.00232781	-0.440016	0.697	0.904	1	Down in ERSC
CADM4	non-TF	0.00903529	-0.459558	0.082	0.209	1	Down in ERSC
RPL19	non-TF	0.00183694	-0.461656	0.27	0.513	1	Down in ERSC
YWHAE	non-TF	0.00501891	-0.464845	0.361	0.6	1	Down in ERSC	TRUE
RPS28	non-TF	0.000849548	-0.487318	0.639	0.843	1	Down in ERSC
RASGRP1	non-TF	0.00460768	-0.48768	0.033	0.139	1	Down in ERSC	TRUE
RRS1	non-TF	0.00496595	-0.49397	0.016	0.104	1	Down in ERSC
COX7A2	non-TF	0.0096126	-0.495277	0.172	0.33	1	Down in ERSC
STMP1	non-TF	0.00697369	-0.50715	0.041	0.148	1	Down in ERSC
RPL27	non-TF	0.00236517	-0.509032	0.23	0.47	1	Down in ERSC
HSPB1	non-TF	0.000819271	-0.509975	0.082	0.243	1	Down in ERSC	TRUE
TNFRSF12A	non-TF	0.00406137	-0.515955	0.156	0.339	1	Down in ERSC	TRUE
AMFR	non-TF	0.00783689	-0.518883	0.033	0.13	1	Down in ERSC
RPS15A	non-TF	0.00320481	-0.519888	0.246	0.452	1	Down in ERSC
TOMM5	non-TF	0.00794691	-0.52286	0.172	0.339	1	Down in ERSC
CISD1	non-TF	0.0076516	-0.527077	0.033	0.13	1	Down in ERSC
RPL32	non-TF	0.00454593	-0.531067	0.361	0.6	1	Down in ERSC
LRPAP1	non-TF	0.00972499	-0.533647	0.049	0.157	1	Down in ERSC
SH3BGRL3	non-TF	0.00230055	-0.534272	0.148	0.33	1	Down in ERSC
RPS11	non-TF	0.00302344	-0.536752	0.189	0.383	1	Down in ERSC
RPS23	non-TF	0.00169553	-0.54751	0.311	0.583	1	Down in ERSC
RPS8	non-TF	0.000485342	-0.565771	0.377	0.687	1	Down in ERSC
EIF5A	non-TF	0.000617308	-0.567571	0.131	0.348	1	Down in ERSC	TRUE
RPS26	non-TF	0.00162798	-0.569748	0.295	0.539	1	Down in ERSC
RPS16	non-TF	0.0035321	-0.575606	0.279	0.496	1	Down in ERSC
PFDN2	non-TF	0.00465568	-0.57923	0.123	0.287	1	Down in ERSC
NDUFB1	non-TF	0.00822357	-0.581931	0.139	0.296	1	Down in ERSC	TRUE
SCAMP3	non-TF	0.00841905	-0.584319	0.025	0.113	1	Down in ERSC
TMEM248	non-TF	0.00820532	-0.595594	0.025	0.113	1	Down in ERSC
RPL26	non-TF	0.0011198	-0.596068	0.303	0.548	1	Down in ERSC
CISD3	non-TF	0.00279582	-0.597436	0.016	0.113	1	Down in ERSC
CYCS	non-TF	0.00355534	-0.602779	0.098	0.252	1	Down in ERSC
POMP	non-TF	0.00177527	-0.606096	0.205	0.409	1	Down in ERSC
EIF2S2	non-TF	0.00138425	-0.612703	0.238	0.47	1	Down in ERSC
RPL4	non-TF	0.000373953	-0.618729	0.279	0.539	1	Down in ERSC
ATP5MPL	non-TF	0.00257127	-0.623381	0.098	0.261	1	Down in ERSC
RPL27A	non-TF	0.00411608	-0.624296	0.23	0.435	1	Down in ERSC
UQCRB	non-TF	3.25878e-05	-0.626322	0.09	0.33	0.43925	Down in ERSC	TRUE
KLHDC10	non-TF	0.00440392	-0.633041	0.025	0.122	1	Down in ERSC
UGP2	non-TF	0.00542013	-0.644604	0.041	0.148	1	Down in ERSC
ZYX	non-TF	0.000336593	-0.651128	0.107	0.313	1	Down in ERSC
COL17A1	non-TF	0.00231027	-0.652335	0.041	0.165	1	Down in ERSC
ITGA2	non-TF	0.00113996	-0.661069	0.213	0.435	1	Down in ERSC	TRUE
RWDD1	non-TF	0.000263162	-0.661384	0.041	0.2	1	Down in ERSC
CFL1	non-TF	0.00128584	-0.66557	0.402	0.661	1	Down in ERSC	TRUE
TMSB4X	non-TF	6.99637e-07	-0.66689	0.443	0.791	0.0094304	Down in ERSC
FZD7	non-TF	0.00640319	-0.667879	0.09	0.226	1	Down in ERSC	TRUE
STOM	non-TF	0.00306264	-0.670813	0.049	0.174	1	Down in ERSC
UQCRH	non-TF	0.00149913	-0.674462	0.066	0.217	1	Down in ERSC
EIF3H	non-TF	0.00440392	-0.675891	0.025	0.122	1	Down in ERSC
DDX21	non-TF	4.15713e-05	-0.677139	0.238	0.539	0.560339	Down in ERSC
TRIR	non-TF	0.00133786	-0.683378	0.213	0.435	1	Down in ERSC
NDUFB2	non-TF	0.0025989	-0.687387	0.139	0.322	1	Down in ERSC	TRUE
ATP5F1C	non-TF	0.00615284	-0.691731	0.041	0.148	1	Down in ERSC
RPLP1	non-TF	7.51145e-06	-0.693934	0.672	0.878	0.101247	Down in ERSC
STOML2	non-TF	0.0060873	-0.701385	0.074	0.2	1	Down in ERSC
RPL41	non-TF	8.71745e-09	-0.703629	0.828	0.948	0.000117502	Down in ERSC
COPS9	non-TF	0.000258512	-0.711056	0.148	0.374	1	Down in ERSC
NAXE	non-TF	0.00863776	-0.716777	0.025	0.113	1	Down in ERSC
RPL35A	non-TF	9.9161e-05	-0.717997	0.369	0.643	1	Down in ERSC
RPL34	non-TF	8.027e-05	-0.7198	0.303	0.6	1	Down in ERSC
COX5A	non-TF	0.00462177	-0.722368	0.082	0.217	1	Down in ERSC
TMCO1	non-TF	0.00309757	-0.722829	0.049	0.174	1	Down in ERSC
SERBP1	non-TF	0.000548495	-0.726899	0.098	0.296	1	Down in ERSC
CAST	non-TF	0.00954968	-0.728588	0.148	0.296	1	Down in ERSC	TRUE
COX7C	non-TF	0.00841572	-0.729161	0.238	0.417	1	Down in ERSC
RPL5	non-TF	0.000108713	-0.729377	0.279	0.565	1	Down in ERSC
OST4	non-TF	7.72974e-05	-0.729446	0.23	0.496	1	Down in ERSC
SLIRP	non-TF	0.00020668	-0.730875	0.066	0.252	1	Down in ERSC
ATP5F1E	non-TF	7.59576e-06	-0.73453	0.566	0.826	0.102383	Down in ERSC	TRUE
RPS5	non-TF	0.00238826	-0.736054	0.082	0.226	1	Down in ERSC
GNB2	non-TF	0.00433202	-0.742979	0.033	0.139	1	Down in ERSC
RPLP0	non-TF	2.61612e-05	-0.748334	0.27	0.6	0.352626	Down in ERSC
SLC5A3	non-TF	0.00817092	-0.749184	0.082	0.209	1	Down in ERSC	TRUE
RAP1GAP2	non-TF	0.004226	-0.751791	0.033	0.139	1	Down in ERSC
TSPAN3	non-TF	0.0011674	-0.752892	0.123	0.313	1	Down in ERSC
BRIP1	non-TF	0.00489629	-0.757639	0.025	0.122	1	Down in ERSC
ATP5MC2	non-TF	2.12138e-05	-0.770994	0.148	0.426	0.28594	Down in ERSC
TUBA1B	non-TF	0.000387905	-0.772376	0.197	0.426	1	Down in ERSC	TRUE
SNHG8	non-TF	0.00013247	-0.77661	0.18	0.435	1	Down in ERSC
CAPNS1	non-TF	0.000852037	-0.777343	0.066	0.226	1	Down in ERSC
FKBP4	non-TF	0.00372556	-0.778158	0.066	0.2	1	Down in ERSC	TRUE
SNORC	non-TF	0.00253607	-0.780039	0.025	0.13	1	Down in ERSC
DHCR7	non-TF	0.00458304	-0.780541	0.025	0.122	1	Down in ERSC	TRUE
ATP5PF	non-TF	0.000693809	-0.784572	0.049	0.2	1	Down in ERSC
ZFP36	non-TF	0.000316544	-0.785045	0.172	0.4	1	Down in ERSC
DDR1	non-TF	0.00309757	-0.785367	0.049	0.174	1	Down in ERSC	TRUE
SNHG9	non-TF	0.000115006	-0.785391	0.156	0.409	1	Down in ERSC
GAS1	non-TF	0.00857161	-0.785612	0.041	0.139	1	Down in ERSC
YBX1	TF	0.000123896	-0.785692	0.164	0.417	1	Down in ERSC
LRRC8D	non-TF	0.00461954	-0.786837	0.016	0.104	1	Down in ERSC
NCL	non-TF	0.000786637	-0.793077	0.123	0.322	1	Down in ERSC	TRUE
CD24	non-TF	0.00124882	-0.797052	0.082	0.243	1	Down in ERSC
PA2G4	non-TF	1.25419e-05	-0.801349	0.09	0.339	0.169052	Down in ERSC
NDUFAB1	non-TF	0.00135294	-0.80272	0.057	0.2	1	Down in ERSC	TRUE
TOMM22	non-TF	0.00053306	-0.805494	0.033	0.174	1	Down in ERSC
TMA7	non-TF	1.51706e-05	-0.806104	0.418	0.739	0.204485	Down in ERSC
SLC12A2	non-TF	0.000800169	-0.806334	0.041	0.183	1	Down in ERSC	TRUE
GNPNAT1	non-TF	0.00911984	-0.806821	0.041	0.139	1	Down in ERSC
MRPL20	non-TF	0.00151554	-0.811287	0.057	0.2	1	Down in ERSC
TXNDC17	non-TF	0.00320455	-0.813242	0.049	0.174	1	Down in ERSC
ANXA3	non-TF	0.00267492	-0.819461	0.016	0.113	1	Down in ERSC
PLS1	non-TF	0.00130857	-0.824763	0.008	0.104	1	Down in ERSC
MRPS6	non-TF	0.00608727	-0.82978	0.074	0.2	1	Down in ERSC
HINT1	non-TF	1.76512e-05	-0.834392	0.197	0.496	0.237921	Down in ERSC	TRUE
MRPL51	non-TF	0.00171412	-0.836328	0.049	0.183	1	Down in ERSC
COMMD6	non-TF	0.000122543	-0.836479	0.156	0.4	1	Down in ERSC
PRR34-AS1	non-TF	0.00265074	-0.851909	0.033	0.148	1	Down in ERSC
SUMO2	non-TF	0.00726807	-0.852115	0.066	0.183	1	Down in ERSC	TRUE
TOMM7	non-TF	7.57797e-05	-0.853495	0.139	0.391	1	Down in ERSC
DHRS7	non-TF	0.00475539	-0.860371	0.016	0.104	1	Down in ERSC
IRAK1	non-TF	0.00799645	-0.860463	0.025	0.113	1	Down in ERSC	TRUE
RPS7	non-TF	1.9133e-05	-0.862559	0.246	0.539	0.257894	Down in ERSC
CD9	non-TF	0.000264796	-0.863672	0.148	0.374	1	Down in ERSC	TRUE
ARL6IP4	non-TF	0.0064608	-0.866417	0.033	0.13	1	Down in ERSC
WRNIP1	non-TF	0.00461954	-0.867055	0.016	0.104	1	Down in ERSC
KRT10	non-TF	7.3673e-05	-0.870971	0.131	0.374	0.993039	Down in ERSC	TRUE
TUBB4B	non-TF	0.00115089	-0.87386	0.107	0.278	1	Down in ERSC	TRUE
SELENOW	non-TF	0.00327774	-0.87987	0.049	0.174	1	Down in ERSC
LARP6	non-TF	0.00593031	-0.881641	0.033	0.13	1	Down in ERSC
ATP5ME	non-TF	1.10723e-05	-0.883215	0.303	0.626	0.149243	Down in ERSC
ATP5MG	non-TF	0.000124404	-0.883859	0.148	0.391	1	Down in ERSC
TGFA	non-TF	0.00221764	-0.890475	0.033	0.148	1	Down in ERSC	TRUE
SLC38A1	non-TF	0.00048642	-0.890964	0.066	0.235	1	Down in ERSC	TRUE
NDUFA3	non-TF	0.00532055	-0.899943	0.057	0.174	1	Down in ERSC	TRUE
PDCD5	non-TF	0.000630452	-0.901817	0.123	0.313	1	Down in ERSC
RPL31	non-TF	2.1868e-06	-0.906291	0.443	0.739	0.0294759	Down in ERSC
MAZ	TF	0.00461954	-0.909814	0.016	0.104	1	Down in ERSC	TRUE
APRT	non-TF	0.00455294	-0.911296	0.016	0.104	1	Down in ERSC	TRUE
TUFM	non-TF	0.00151235	-0.914752	0.025	0.139	1	Down in ERSC
MIAT	non-TF	0.00529566	-0.915378	0.041	0.148	1	Down in ERSC
TBCB	non-TF	0.00147472	-0.9164	0.016	0.122	1	Down in ERSC
ACTN4	non-TF	2.57813e-05	-0.917678	0.295	0.591	0.347506	Down in ERSC
CSK	non-TF	0.00246786	-0.917956	0.025	0.13	1	Down in ERSC	TRUE
EIF3G	non-TF	0.00600361	-0.918506	0.033	0.13	1	Down in ERSC
MIR4435-2HG	non-TF	4.58307e-06	-0.920137	0.066	0.304	0.0617751	Down in ERSC
RNPS1	non-TF	0.00240006	-0.923645	0.057	0.191	1	Down in ERSC
LAMB3	non-TF	4.63564e-05	-0.924847	0.172	0.426	0.624838	Down in ERSC	TRUE
NFE2L1	TF	0.00702186	-0.925258	0.025	0.113	1	Down in ERSC
SNRPD2	non-TF	0.000459196	-0.925588	0.074	0.252	1	Down in ERSC
AGPAT5	non-TF	0.00427686	-0.926785	0.049	0.165	1	Down in ERSC
RPS21	non-TF	6.25703e-06	-0.930345	0.361	0.687	0.0843385	Down in ERSC
NDUFAF8	non-TF	0.00429516	-0.935519	0.016	0.104	1	Down in ERSC
LDHB	non-TF	0.000230081	-0.936667	0.049	0.217	1	Down in ERSC
NOP10	non-TF	0.00732839	-0.937507	0.115	0.252	1	Down in ERSC
SMIM37	non-TF	6.5647e-05	-0.93879	0.082	0.296	0.884855	Down in ERSC
RPL13A	non-TF	6.52585e-07	-0.951926	0.295	0.678	0.0087962	Down in ERSC
CYB5A	non-TF	0.00149705	-0.952121	0.016	0.122	1	Down in ERSC
KNOP1	non-TF	0.00455294	-0.952192	0.016	0.104	1	Down in ERSC
RPL38	non-TF	6.53387e-06	-0.953306	0.295	0.626	0.08807	Down in ERSC
WDR1	non-TF	0.000171197	-0.953635	0.074	0.261	1	Down in ERSC
SLC1A3	non-TF	0.00684025	-0.954469	0.025	0.113	1	Down in ERSC	TRUE
RPL18A	non-TF	3.68252e-05	-0.957374	0.27	0.557	0.496366	Down in ERSC
MRPS16	non-TF	0.000387319	-0.961434	0.008	0.122	1	Down in ERSC
RPS12	non-TF	6.21623e-09	-0.96211	0.557	0.861	8.37886e-05	Down in ERSC
EPPK1	non-TF	0.00130857	-0.962262	0.008	0.104	1	Down in ERSC
TLR4	non-TF	0.000271261	-0.965185	0.016	0.148	1	Down in ERSC	TRUE
RPS19	non-TF	7.48001e-05	-0.969346	0.205	0.478	1	Down in ERSC	TRUE
COX17	non-TF	1.80908e-07	-0.971184	0.344	0.696	0.00243846	Down in ERSC
CEBPD	TF	5.45001e-06	-0.972918	0.369	0.652	0.0734606	Down in ERSC
FOXC1	TF	0.00937596	-0.979104	0.033	0.122	1	Down in ERSC
RPS20	non-TF	9.5689e-05	-0.979886	0.262	0.522	1	Down in ERSC
RPL12	non-TF	4.75312e-07	-0.985529	0.262	0.617	0.00640673	Down in ERSC
NSA2	non-TF	0.00566896	-0.986367	0.057	0.174	1	Down in ERSC
NME1	non-TF	0.00133063	-0.986409	0.008	0.104	1	Down in ERSC	TRUE
AMOTL2	non-TF	0.00218933	-0.992433	0.033	0.148	1	Down in ERSC
SNRPD1	non-TF	0.00131008	-0.994715	0.131	0.304	1	Down in ERSC
COX20	non-TF	0.000226474	-0.997691	0.139	0.357	1	Down in ERSC
GTF3C6	non-TF	0.000447882	-1.00175	0.016	0.139	1	Down in ERSC
ROMO1	non-TF	1.08594e-06	-1.00416	0.197	0.548	0.0146373	Down in ERSC
IMPDH2	non-TF	0.00666287	-1.01237	0.025	0.113	1	Down in ERSC	TRUE
ODC1	non-TF	0.000261886	-1.01595	0.066	0.243	1	Down in ERSC	TRUE
WLS	non-TF	0.00364902	-1.01709	0.098	0.243	1	Down in ERSC
DDX1	non-TF	0.000836199	-1.01762	0.025	0.148	1	Down in ERSC
CDH1	non-TF	0.00129195	-1.0211	0.033	0.157	1	Down in ERSC	TRUE
ATP5MF	non-TF	0.000157	-1.02523	0.066	0.252	1	Down in ERSC
MYOF	non-TF	0.000247562	-1.03113	0.115	0.322	1	Down in ERSC
NPM3	non-TF	0.000255764	-1.03147	0.066	0.243	1	Down in ERSC
NDUFB10	non-TF	0.00395686	-1.03174	0.025	0.122	1	Down in ERSC	TRUE
SELENOH	non-TF	0.00702186	-1.03285	0.025	0.113	1	Down in ERSC
C19orf24	non-TF	0.00370759	-1.04141	0.016	0.104	1	Down in ERSC
SMIM4	non-TF	0.00101822	-1.04354	0.041	0.174	1	Down in ERSC
CCT6A	non-TF	0.000482776	-1.0548	0.074	0.243	1	Down in ERSC
PSMD14	non-TF	0.000332282	-1.05491	0.098	0.287	1	Down in ERSC	TRUE
CLPTM1L	non-TF	0.000202812	-1.05518	0.082	0.278	1	Down in ERSC
SPRR1B	non-TF	2.35234e-08	-1.06274	0.107	0.461	0.000317072	Down in ERSC
LIMA1	non-TF	0.00037091	-1.06285	0.131	0.33	1	Down in ERSC
NHP2	non-TF	0.000549698	-1.06462	0.049	0.2	1	Down in ERSC
PTMS	non-TF	0.00982878	-1.06468	0.049	0.148	1	Down in ERSC
C1orf43	non-TF	6.19162e-05	-1.06532	0.008	0.148	0.834568	Down in ERSC
MZT2B	non-TF	0.000251657	-1.06711	0.033	0.183	1	Down in ERSC
MRPL33	non-TF	3.48778e-06	-1.06906	0.115	0.4	0.0470118	Down in ERSC
ATP5MD	non-TF	8.81834e-07	-1.07377	0.311	0.652	0.0118862	Down in ERSC
DKK1	non-TF	0.000620204	-1.07966	0.041	0.183	1	Down in ERSC	TRUE
CYTOR	non-TF	0.000244762	-1.09306	0.033	0.183	1	Down in ERSC
CHST6	non-TF	0.000955805	-1.09383	0.041	0.174	1	Down in ERSC
SDC4	non-TF	0.0064608	-1.0946	0.033	0.13	1	Down in ERSC
TPBG	non-TF	0.000492542	-1.09688	0.09	0.27	1	Down in ERSC	TRUE
BOLA2B	non-TF	0.000460734	-1.09866	0.057	0.217	1	Down in ERSC
KRT19	non-TF	0.00122742	-1.10688	0.09	0.252	1	Down in ERSC	TRUE
C4orf48	non-TF	0.00016308	-1.10776	0.066	0.243	1	Down in ERSC
LMO4	non-TF	1.85126e-05	-1.10813	0.246	0.522	0.249532	Down in ERSC
NDUFA12	non-TF	0.000261784	-1.10872	0.057	0.226	1	Down in ERSC	TRUE
ENAH	non-TF	0.000246188	-1.11037	0.057	0.226	1	Down in ERSC
THOC7	non-TF	0.00993433	-1.11138	0.049	0.148	1	Down in ERSC
UQCR11	non-TF	5.12235e-06	-1.11589	0.107	0.383	0.0690442	Down in ERSC
ATP5IF1	non-TF	0.000420871	-1.12419	0.016	0.139	1	Down in ERSC
TRIM47	non-TF	0.000542946	-1.12608	0.049	0.2	1	Down in ERSC
GSN	non-TF	7.70659e-05	-1.12684	0.107	0.322	1	Down in ERSC
KRTCAP2	non-TF	0.00207939	-1.12895	0.033	0.148	1	Down in ERSC
EXOSC6	non-TF	0.00126544	-1.13651	0.008	0.104	1	Down in ERSC
RGS4	non-TF	0.000125553	-1.13682	0.098	0.304	1	Down in ERSC	TRUE
NDUFC1	non-TF	5.76908e-06	-1.14263	0.123	0.383	0.0777615	Down in ERSC	TRUE
PARK7	non-TF	0.000262899	-1.14861	0.016	0.148	1	Down in ERSC
SFN	non-TF	0.00119128	-1.15549	0.23	0.426	1	Down in ERSC	TRUE
SLC25A6	non-TF	0.00197453	-1.15652	0.033	0.148	1	Down in ERSC	TRUE
TMSB10	non-TF	2.74645e-07	-1.15896	0.352	0.678	0.00370194	Down in ERSC	TRUE
CBX3	non-TF	1.14174e-05	-1.16067	0.139	0.4	0.153895	Down in ERSC
SET	non-TF	7.6054e-07	-1.16746	0.254	0.591	0.0102513	Down in ERSC
AGRN	non-TF	1.44576e-05	-1.17257	0.025	0.209	0.194874	Down in ERSC
RPS29	non-TF	4.43903e-09	-1.17966	0.459	0.826	5.98337e-05	Down in ERSC
CDH11	non-TF	1.87494e-07	-1.18592	0.148	0.487	0.00252723	Down in ERSC	TRUE
NOP56	non-TF	0.000374092	-1.18596	0.033	0.174	1	Down in ERSC
CAPN2	non-TF	5.31554e-05	-1.19244	0.172	0.409	0.716481	Down in ERSC	TRUE
S100A11	non-TF	3.99317e-10	-1.1935	0.467	0.878	5.38239e-06	Down in ERSC
GART	non-TF	0.000115416	-1.19552	0.016	0.157	1	Down in ERSC	TRUE
MYH14	non-TF	0.000207022	-1.19692	0.057	0.226	1	Down in ERSC	TRUE
TINAGL1	non-TF	0.000748888	-1.19711	0.016	0.13	1	Down in ERSC
UQCR10	non-TF	0.00056588	-1.19786	0.107	0.278	1	Down in ERSC	TRUE
SDAD1	non-TF	0.00322803	-1.20109	0.025	0.122	1	Down in ERSC
RAB5IF	non-TF	0.000387319	-1.20186	0.008	0.122	1	Down in ERSC
TSEN15	non-TF	0.00110575	-1.20861	0.008	0.104	1	Down in ERSC
ANXA2	non-TF	2.02698e-11	-1.2092	0.533	0.87	2.73216e-07	Down in ERSC	TRUE
MYADM	non-TF	0.000393979	-1.2097	0.008	0.122	1	Down in ERSC
CDK14	non-TF	0.00227152	-1.20986	0.016	0.113	1	Down in ERSC	TRUE
IFITM3	non-TF	5.15528e-10	-1.22093	0.352	0.765	6.94881e-06	Down in ERSC
ATP5MC1	non-TF	2.39481e-05	-1.22227	0.082	0.304	0.322796	Down in ERSC
MIA	non-TF	0.000178615	-1.22779	0.066	0.243	1	Down in ERSC	TRUE
IFI27	non-TF	0.00111071	-1.23431	0.025	0.139	1	Down in ERSC	TRUE
THBS1	non-TF	0.00738669	-1.23703	0.074	0.191	1	Down in ERSC	TRUE
AIMP1	non-TF	0.00136759	-1.23733	0.016	0.122	1	Down in ERSC
RPL37	non-TF	8.48579e-11	-1.24423	0.443	0.852	1.1438e-06	Down in ERSC
EPCAM	non-TF	1.24833e-05	-1.245	0.098	0.339	0.168262	Down in ERSC	TRUE
LYPD1	non-TF	0.000140419	-1.24721	0	0.113	1	Down in ERSC
SPRR2D	non-TF	1.30556e-05	-1.24793	0.049	0.261	0.175976	Down in ERSC
UQCRQ	non-TF	2.03087e-07	-1.25361	0.164	0.513	0.00273741	Down in ERSC
ITGB4	non-TF	0.00036172	-1.29363	0.008	0.122	1	Down in ERSC
PHACTR2	non-TF	0.000387319	-1.29415	0.008	0.122	1	Down in ERSC
METTL7B	non-TF	7.50573e-05	-1.3006	0.025	0.183	1	Down in ERSC
CSTB	non-TF	2.03855e-08	-1.30092	0.172	0.548	0.000274776	Down in ERSC
BOLA3	non-TF	0.000106187	-1.30657	0.049	0.226	1	Down in ERSC
SCD5	non-TF	0.000693302	-1.33317	0.016	0.13	1	Down in ERSC
CAPN1	non-TF	0.000115416	-1.33952	0.016	0.157	1	Down in ERSC	TRUE
KANK1	non-TF	0.000633124	-1.34224	0.008	0.113	1	Down in ERSC
CBX6	non-TF	4.18155e-06	-1.35097	0.115	0.383	0.0563631	Down in ERSC
CRIM1	non-TF	0.000697962	-1.35389	0.049	0.191	1	Down in ERSC
SERPINB1	non-TF	3.87502e-05	-1.35599	0.057	0.252	0.522314	Down in ERSC
ICMT	non-TF	6.25151e-05	-1.36513	0.025	0.183	0.842641	Down in ERSC	TRUE
SNU13	non-TF	2.30299e-05	-1.38644	0.025	0.2	0.31042	Down in ERSC
SLC12A7	non-TF	5.14643e-05	-1.38884	0.049	0.235	0.693688	Down in ERSC	TRUE
ABHD2	non-TF	4.05748e-06	-1.39546	0.066	0.304	0.0546908	Down in ERSC
RPL36	non-TF	6.39208e-09	-1.40082	0.254	0.635	8.61588e-05	Down in ERSC
ARL4C	non-TF	9.6335e-06	-1.4026	0.082	0.313	0.12985	Down in ERSC
TMBIM1	non-TF	0.000151515	-1.40832	0.033	0.183	1	Down in ERSC
FXYD3	non-TF	0.000358333	-1.41245	0.025	0.157	1	Down in ERSC
PKN2	non-TF	7.39274e-05	-1.41459	0.025	0.183	0.996468	Down in ERSC	TRUE
SPINT2	non-TF	0.000337704	-1.41738	0.008	0.122	1	Down in ERSC
RBP1	non-TF	2.94387e-08	-1.41754	0.082	0.409	0.000396804	Down in ERSC
BRI3	non-TF	6.76192e-05	-1.43163	0.049	0.226	0.911439	Down in ERSC
PYURF	non-TF	0.000757012	-1.43261	0.025	0.148	1	Down in ERSC
WFDC2	non-TF	3.82583e-05	-1.45155	0.016	0.174	0.515684	Down in ERSC
PKP2	non-TF	0.000343568	-1.45357	0.008	0.122	1	Down in ERSC
LCN2	non-TF	0.000391228	-1.45968	0.025	0.157	1	Down in ERSC
FAAP20	non-TF	8.9539e-06	-1.48204	0.041	0.243	0.12069	Down in ERSC
SCNN1A	non-TF	5.87521e-05	-1.48972	0.008	0.148	0.791919	Down in ERSC	TRUE
TIMM8B	non-TF	3.46056e-06	-1.52595	0.074	0.313	0.0466449	Down in ERSC
LTBP3	non-TF	9.0876e-05	-1.54332	0.057	0.235	1	Down in ERSC
CST3	non-TF	4.55622e-09	-1.55089	0.074	0.409	6.14132e-05	Down in ERSC	TRUE
COL4A2	non-TF	1.43303e-05	-1.55148	0.09	0.313	0.193159	Down in ERSC	TRUE
CD99	non-TF	9.10278e-10	-1.56322	0.221	0.609	1.22696e-05	Down in ERSC
CTSV	non-TF	1.18274e-07	-1.56559	0.082	0.391	0.00159421	Down in ERSC	TRUE
PRSS23	non-TF	1.26675e-05	-1.57137	0.082	0.304	0.170745	Down in ERSC
FBXO2	non-TF	2.84714e-06	-1.58948	0.041	0.261	0.0383766	Down in ERSC
SPRR2A	non-TF	0.000326271	-1.60786	0.008	0.122	1	Down in ERSC
IGFBP3	non-TF	5.3978e-05	-1.63095	0.066	0.261	0.727569	Down in ERSC	TRUE
CCT3	non-TF	1.08926e-05	-1.64596	0.025	0.209	0.146822	Down in ERSC
RPL35	non-TF	6.37727e-14	-1.66097	0.32	0.783	8.59592e-10	Down in ERSC
IFITM2	non-TF	1.05529e-05	-1.69638	0.025	0.209	0.142242	Down in ERSC
TMEM147	non-TF	3.99421e-05	-1.73268	0	0.13	0.538379	Down in ERSC
CYR61	non-TF	1.77598e-07	-1.75999	0.107	0.4	0.00239384	Down in ERSC
ATP1B1	non-TF	7.8991e-10	-1.77266	0.115	0.487	1.06472e-05	Down in ERSC	TRUE
CDH2	non-TF	1.99601e-07	-1.78776	0.041	0.296	0.00269042	Down in ERSC	TRUE
SPINT1	non-TF	6.8223e-07	-1.79146	0.016	0.226	0.00919578	Down in ERSC	TRUE
SHISA9	non-TF	1.62271e-06	-1.79994	0	0.174	0.0218726	Down in ERSC
SLC34A2	non-TF	1.97441e-07	-1.80044	0.123	0.417	0.00266131	Down in ERSC	TRUE
LRRC75A	non-TF	2.03316e-10	-1.80247	0.131	0.539	2.74049e-06	Down in ERSC
CLDN7	non-TF	1.38636e-05	-1.84197	0.049	0.243	0.186868	Down in ERSC
S100A13	non-TF	2.57968e-10	-1.88163	0.066	0.435	3.47716e-06	Down in ERSC
GFAP	non-TF	5.66702e-08	-1.88834	0.066	0.348	0.000763858	Down in ERSC	TRUE
MEST	non-TF	1.18912e-07	-1.94002	0.057	0.33	0.00160282	Down in ERSC
S100A2	non-TF	5.62823e-10	-2.04726	0.27	0.652	7.58629e-06	Down in ERSC	TRUE
ANXA1	non-TF	1.44436e-12	-2.09525	0.131	0.574	1.94685e-08	Down in ERSC	TRUE
LAYN	non-TF	1.74339e-08	-2.19754	0.033	0.304	0.000234991	Down in ERSC
S100A10	non-TF	2.34163e-30	-2.21873	0.475	0.991	3.15629e-26	Down in ERSC	TRUE
KRT18	non-TF	3.09998e-17	-2.27848	0.139	0.687	4.17846e-13	Down in ERSC	TRUE
CMYA5	non-TF	6.86542e-24	-2.29112	0.295	0.922	9.2539e-20	Down in ERSC
S100A1	non-TF	1.38267e-15	-2.3766	0.107	0.609	1.8637e-11	Down in ERSC
S100A14	non-TF	4.89307e-26	-2.63862	0.172	0.87	6.59537e-22	Down in ERSC
CTGF	non-TF	4.19417e-17	-2.76206	0.164	0.67	5.65332e-13	Down in ERSC
NOG	non-TF	9.58269e-15	-2.78662	0.057	0.504	1.29165e-10	Down in ERSC
KRT8	non-TF	2.82931e-23	-2.86106	0.156	0.783	3.81363e-19	Down in ERSC
ANKRD1	non-TF	8.76073e-44	-4.98867	0.098	1	1.18086e-39	Down in ERSC

## Sheet: Table S6. ERSC subcluster genes
Table S6. Differential expression analysis between Early-Responding Supporting Cells (ERSC) subclusters from gentamicin-treated utricle (scGent-2). Wilcoxon rank-sum test, with a Bonferroni Padj < .05. Related to Figure 8f.
Colours are matched to Figure 8f and 8h cluster colours. Transcription factors (TF) were detected using AnimalTFDB 3.0, druggable genes using DGIdb 4.0.
Gene	TF	p_val	avg_log2FC	pct.1	pct.2	p_val_adj	Subcluster	Drug
RPS13	non-TF	4.17148e-12	2.30662	0.909	0.171	5.62274e-08	1
MT-CO2	non-TF	3.14742e-09	-1.503	0.818	0.974	4.24241e-05	1	TRUE
APC	non-TF	1.82839e-08	2.9027	0.424	0.013	0.000246449	1	TRUE
ERRFI1	non-TF	3.22842e-08	3.2621	0.364	0	0.000435159	1	TRUE
C11orf96	non-TF	4.83075e-08	2.14157	0.697	0.211	0.000651137	1
LINC01198	non-TF	1.38212e-07	3.29511	0.333	0	0.00186295	1
PALLD	non-TF	1.38212e-07	2.53206	0.333	0	0.00186295	1
MT-CO1	non-TF	4.92661e-07	-1.23832	0.909	0.974	0.00664058	1	TRUE
LAMB3	non-TF	5.97747e-07	2.22745	0.485	0.066	0.00805703	1	TRUE
MT-ND3	non-TF	6.4729e-07	-1.18758	0.879	0.974	0.00872482	1	TRUE
MALAT1	non-TF	1.03949e-06	1.27664	1	0.934	0.0140113	1	TRUE
CDH11	non-TF	1.59586e-06	2.6734	0.424	0.053	0.0215106	1	TRUE
JUND	TF	1.69362e-06	1.79408	0.758	0.276	0.0228283	1	TRUE
KLF6	TF	1.84273e-06	1.90299	0.545	0.105	0.0248382	1
MMP9	non-TF	1.8564e-06	-5.49895	0	0.487	0.0250224	1	TRUE
PNPLA8	non-TF	2.37425e-06	2.78188	0.273	0	0.0320025	1
SAT1	non-TF	3.80562e-06	2.43353	0.394	0.053	0.051296	1
SUB1	TF	3.90137e-06	1.9821	0.515	0.105	0.0525865	1
TRA2B	non-TF	4.26453e-06	1.79841	0.606	0.158	0.0574816	1
SELENOK	non-TF	4.99672e-06	2.21659	0.545	0.132	0.0673508	1
MT-CO3	non-TF	9.44189e-06	-1.08601	0.879	0.947	0.127267	1
BEX5	non-TF	9.55176e-06	2.51985	0.242	0	0.128748	1
SERPINE2	non-TF	1.08539e-05	-2.52282	0.061	0.526	0.1463	1
ZFAS1	non-TF	1.40919e-05	1.80738	0.636	0.211	0.189944	1
LMO4	non-TF	1.44453e-05	1.45689	0.576	0.145	0.194708	1
GAP43	non-TF	1.53596e-05	-3.73038	0	0.421	0.207031	1
SF3B6	non-TF	1.60842e-05	2.12852	0.273	0.013	0.216799	1
GAPDH	non-TF	2.28242e-05	-2.25594	0.182	0.605	0.307648	1	TRUE
SKIL	non-TF	2.29296e-05	2.32092	0.273	0.013	0.309069	1
CHMP2B	non-TF	2.29296e-05	1.84584	0.273	0.013	0.309069	1
DIRAS3	non-TF	2.43115e-05	2.20795	0.273	0.013	0.327694	1
CBX6	non-TF	2.63149e-05	2.25152	0.333	0.039	0.354699	1
SRSF3	non-TF	2.64899e-05	1.2029	0.667	0.197	0.357058	1
KRT8	non-TF	3.53601e-05	1.77372	0.394	0.066	0.476618	1
WASF2	non-TF	3.75555e-05	1.89257	0.515	0.158	0.506211	1
LNX1	non-TF	3.77563e-05	2.59562	0.212	0	0.508918	1
RAET1L	non-TF	3.77563e-05	1.75823	0.212	0	0.508918	1
RPS27A	non-TF	4.16576e-05	1.63151	0.576	0.171	0.561503	1
MYO5B	non-TF	4.19688e-05	1.67602	0.303	0.026	0.565698	1
TES	non-TF	4.42996e-05	2.44663	0.364	0.066	0.597114	1
DHX40	non-TF	5.79854e-05	2.68815	0.242	0.013	0.781585	1
UBB	non-TF	5.79854e-05	2.46388	0.242	0.013	0.781585	1
CEP95	non-TF	5.93986e-05	2.03116	0.394	0.079	0.800634	1
ITGB8	non-TF	7.40642e-05	-3.25352	0.03	0.408	0.998312	1	TRUE
RBMX	non-TF	8.82572e-05	1.53036	0.515	0.132	1	1
SEC62	non-TF	8.84937e-05	1.30296	0.667	0.237	1	1
GADD45A	non-TF	0.000121657	1.56416	0.424	0.105	1	1	TRUE
ARID5B	TF	0.000130718	1.84068	0.394	0.092	1	1	TRUE
EDNRB	non-TF	0.000131562	-2.85717	0.03	0.408	1	1	TRUE
LSM7	non-TF	0.000135697	1.62164	0.333	0.053	1	1
CYLD	non-TF	0.0001358	1.57988	0.394	0.079	1	1
FAM133B	non-TF	0.000143634	1.4852	0.364	0.066	1	1
CCDC80	non-TF	0.000146979	3.11481	0.182	0	1	1
AGR3	non-TF	0.000146979	2.81829	0.182	0	1	1
CARMIL1	non-TF	0.000146979	2.759	0.182	0	1	1
PPP4R4	non-TF	0.000146979	2.50624	0.182	0	1	1
FNBP1L	non-TF	0.000146979	2.18159	0.182	0	1	1
SLU7	non-TF	0.000146979	2.16814	0.182	0	1	1
UBE2K	non-TF	0.000146979	2.14531	0.182	0	1	1
STK38L	non-TF	0.000146979	1.88233	0.182	0	1	1	TRUE
GKAP1	non-TF	0.000146979	1.86811	0.182	0	1	1
YME1L1	non-TF	0.000148324	1.69663	0.333	0.053	1	1
MTRNR2L12	non-TF	0.000150009	1.51349	0.576	0.197	1	1
LIMA1	non-TF	0.000184905	1.63957	0.333	0.053	1	1
CXCL8	non-TF	0.000209703	-4.15741	0.061	0.408	1	1	TRUE
PMEPA1	non-TF	0.000224543	-3.55837	0	0.329	1	1
ANKLE2	non-TF	0.000230365	2.2739	0.212	0.013	1	1
RPL36AL	non-TF	0.000251057	1.75984	0.424	0.118	1	1
KLF4	TF	0.000258205	2.15372	0.212	0.013	1	1	TRUE
CTSV	non-TF	0.000270946	2.27068	0.242	0.026	1	1	TRUE
POLR2K	non-TF	0.00027328	2.22988	0.212	0.013	1	1
C6orf141	non-TF	0.00027328	2.09445	0.212	0.013	1	1
APOE	non-TF	0.000288037	-3.31152	0.03	0.368	1	1	TRUE
MIB1	non-TF	0.000289176	2.12635	0.212	0.013	1	1
JUP	non-TF	0.000289176	1.97217	0.212	0.013	1	1
EPCAM	non-TF	0.000305172	1.9726	0.273	0.039	1	1	TRUE
ZNF721	TF	0.000305888	1.91087	0.212	0.013	1	1
CHD2	non-TF	0.000305888	1.88207	0.212	0.013	1	1
SETX	non-TF	0.000305936	2.3793	0.212	0.013	1	1
B4GALT5	non-TF	0.000317748	1.23865	0.394	0.092	1	1
AMD1	non-TF	0.000322862	2.31277	0.364	0.092	1	1	TRUE
ZMYM5	non-TF	0.000323602	1.74488	0.212	0.013	1	1
RSL24D1	non-TF	0.000323602	1.7147	0.212	0.013	1	1
MT-ATP6	non-TF	0.000324708	-0.758865	0.939	0.947	1	1
LRRFIP2	TF	0.000342219	1.67233	0.212	0.013	1	1
SNRPD1	non-TF	0.000352594	1.5189	0.333	0.066	1	1
HNRNPH3	non-TF	0.000427948	1.38522	0.394	0.092	1	1
CCL2	non-TF	0.000436295	-3.43668	0.03	0.355	1	1	TRUE
THBS2	non-TF	0.000458313	-3.43288	0	0.303	1	1	TRUE
TFPI2	non-TF	0.000458313	-3.6569	0	0.303	1	1	TRUE
SRSF10	non-TF	0.000483932	1.43818	0.273	0.039	1	1	TRUE
LGALS3	non-TF	0.000501435	-2.6495	0.061	0.382	1	1	TRUE
NEDD9	non-TF	0.00050638	1.65018	0.273	0.039	1	1
DAAM1	non-TF	0.000519706	1.43466	0.242	0.026	1	1
NEDD4	non-TF	0.000541823	1.37965	0.273	0.039	1	1	TRUE
MPDZ	non-TF	0.000565332	2.0841	0.152	0	1	1
TLE4	non-TF	0.000565332	2.06955	0.152	0	1	1
MAFG	TF	0.000565332	1.8838	0.152	0	1	1
N4BP1	non-TF	0.000565332	1.87515	0.152	0	1	1
SMU1	non-TF	0.000565332	1.81367	0.152	0	1	1
PEG10	non-TF	0.000565332	1.67374	0.152	0	1	1
NCOA7	non-TF	0.000565332	1.64128	0.152	0	1	1
SFR1	non-TF	0.000565332	1.55524	0.152	0	1	1
PAWR	non-TF	0.000565332	1.51049	0.152	0	1	1
EEF1A1	non-TF	0.000575046	0.846645	0.848	0.539	1	1	TRUE
ATXN1	non-TF	0.000579683	1.51085	0.273	0.039	1	1
SNRPG	non-TF	0.000593856	1.45094	0.515	0.184	1	1
RPS15A	non-TF	0.000596119	1.5099	0.485	0.145	1	1
RPS29	non-TF	0.000618932	0.998558	0.758	0.355	1	1
FLNC	non-TF	0.00064035	2.34016	0.303	0.066	1	1
BIRC3	non-TF	0.000652928	-2.5057	0.152	0.461	1	1	TRUE
PNRC1	non-TF	0.000714857	1.38932	0.424	0.118	1	1
MT-ND4	non-TF	0.000715298	-0.692972	0.939	0.947	1	1	TRUE
HSPA5	non-TF	0.000798561	-2.21866	0.091	0.408	1	1	TRUE
S100A10	non-TF	0.000823407	1.12693	0.697	0.382	1	1	TRUE
DCLK1	non-TF	0.000895442	2.90599	0.182	0.013	1	1	TRUE
RPL26	non-TF	0.000907713	1.17235	0.545	0.197	1	1
KIF1A	non-TF	0.000946548	2.52963	0.182	0.013	1	1
KMT2A	non-TF	0.000946548	2.16103	0.182	0.013	1	1	TRUE
MTUS1	non-TF	0.00100035	2.17615	0.182	0.013	1	1
SPRR1B	non-TF	0.00101411	2.46625	0.273	0.053	1	1
PDLIM5	non-TF	0.00105696	1.73452	0.182	0.013	1	1
HNRNPH1	non-TF	0.00106208	1.08681	0.727	0.368	1	1
MAFF	TF	0.00111513	1.48106	0.303	0.066	1	1
MTRNR2L8	non-TF	0.00114581	0.94912	0.455	0.145	1	1
BAG3	non-TF	0.00117919	1.83259	0.182	0.013	1	1
NECTIN2	non-TF	0.00117919	1.65688	0.182	0.013	1	1
ELF3	TF	0.00117919	1.41279	0.182	0.013	1	1
CRABP2	non-TF	0.00124508	1.32688	0.182	0.013	1	1	TRUE
MRPL44	non-TF	0.00124508	1.28606	0.182	0.013	1	1
PIP5K1A	non-TF	0.0013155	1.6733	0.212	0.026	1	1	TRUE
ELF1	TF	0.00138036	1.83348	0.212	0.026	1	1
SPOCD1	non-TF	0.00142552	-2.12721	0.121	0.421	1	1
ATP1B1	non-TF	0.00146701	1.5018	0.273	0.053	1	1	TRUE
PHLPP1	non-TF	0.00151867	1.77756	0.212	0.026	1	1
RAP1B	non-TF	0.00151867	1.5279	0.212	0.026	1	1
IRF2BP2	non-TF	0.00166964	1.23111	0.212	0.026	1	1
FZD7	non-TF	0.00168004	1.52513	0.242	0.039	1	1	TRUE
S100A14	non-TF	0.00173972	1.84311	0.364	0.105	1	1
TIMP3	non-TF	0.00179402	-3.12053	0	0.25	1	1
INHBA	non-TF	0.00188999	2.73186	0.424	0.171	1	1	TRUE
TIMP1	non-TF	0.00193612	-2.95557	0.182	0.434	1	1
LRRFIP1	TF	0.00195611	1.00784	0.333	0.079	1	1
PSAP	non-TF	0.00196022	-1.71154	0.364	0.566	1	1
TAF1D	non-TF	0.00210023	1.07866	0.273	0.053	1	1
HNRNPC	non-TF	0.00212073	1.29809	0.364	0.105	1	1	TRUE
FBXW4	non-TF	0.00215877	1.82851	0.121	0	1	1
BMP5	non-TF	0.00215925	2.35323	0.121	0	1	1	TRUE
DCP1A	non-TF	0.00215925	2.06122	0.121	0	1	1
SENP2	non-TF	0.00215925	1.89938	0.121	0	1	1	TRUE
PDE4D	non-TF	0.00215925	1.83407	0.121	0	1	1	TRUE
GPRC5B	non-TF	0.00215925	1.79855	0.121	0	1	1
ATP2C1	non-TF	0.00215925	1.78779	0.121	0	1	1	TRUE
THAP9-AS1	non-TF	0.00215925	1.76856	0.121	0	1	1
YAF2	non-TF	0.00215925	1.75071	0.121	0	1	1
SAMD4A	non-TF	0.00215925	1.71934	0.121	0	1	1
TBC1D15	non-TF	0.00215925	1.70139	0.121	0	1	1
CAP2	non-TF	0.00215925	1.70051	0.121	0	1	1
DAGLB	non-TF	0.00215925	1.6978	0.121	0	1	1	TRUE
ALOXE3	non-TF	0.00215925	1.67656	0.121	0	1	1
ZMAT2	non-TF	0.00215925	1.65971	0.121	0	1	1
CLK4	non-TF	0.00215925	1.64803	0.121	0	1	1	TRUE
COL4A3BP	non-TF	0.00215925	1.6197	0.121	0	1	1
VARS	non-TF	0.00215925	1.56852	0.121	0	1	1
CRNDE	non-TF	0.00215925	1.56321	0.121	0	1	1
ARMCX2	non-TF	0.00215925	1.53566	0.121	0	1	1
CRTC2	non-TF	0.00215925	1.53283	0.121	0	1	1	TRUE
CPA6	non-TF	0.00215925	1.52169	0.121	0	1	1	TRUE
AL022238.2	non-TF	0.00215925	1.51893	0.121	0	1	1
PDHB	non-TF	0.00215925	1.51456	0.121	0	1	1	TRUE
TBL1XR1	non-TF	0.00215925	1.46505	0.121	0	1	1	TRUE
TRAPPC2B	non-TF	0.00215925	1.4622	0.121	0	1	1
NUMB	non-TF	0.00215925	1.41367	0.121	0	1	1
PDLIM3	non-TF	0.00215925	1.39805	0.121	0	1	1
AC015912.3	non-TF	0.00215925	1.33969	0.121	0	1	1
SPOCK1	non-TF	0.00215925	1.26111	0.121	0	1	1
ERCC1	non-TF	0.00219942	-2.24378	0.061	0.342	1	1	TRUE
POMP	non-TF	0.00234719	0.775105	0.424	0.132	1	1
CDH19	non-TF	0.00249343	-2.87805	0	0.237	1	1
TPT1	non-TF	0.00259272	0.614018	0.758	0.539	1	1	TRUE
RPL35A	non-TF	0.00291222	1.13377	0.606	0.289	1	1
PGK1	non-TF	0.00329455	-2.63314	0.091	0.342	1	1	TRUE
CBX5	non-TF	0.00340674	1.94782	0.152	0.013	1	1
TRIM44	non-TF	0.00340674	1.73488	0.152	0.013	1	1
ERBIN	non-TF	0.00344851	2.0583	0.182	0.026	1	1
H2AFV	non-TF	0.00359413	1.85147	0.152	0.013	1	1
KIAA1217	non-TF	0.00359413	1.78478	0.152	0.013	1	1
ID3	TF	0.00359413	1.58792	0.152	0.013	1	1
PTX3	non-TF	0.00364122	-1.42322	0.03	0.289	1	1
HSPA1A	non-TF	0.00379084	4.27118	0.152	0.013	1	1	TRUE
TOP1	non-TF	0.00379084	2.04971	0.152	0.013	1	1	TRUE
NMT1	non-TF	0.00395933	1.21369	0.424	0.158	1	1
HBP1	TF	0.00399729	1.86518	0.152	0.013	1	1
TRIM41	non-TF	0.00399729	1.73869	0.152	0.013	1	1
RC3H1	non-TF	0.00399729	1.68498	0.152	0.013	1	1
SH2D5	non-TF	0.00399729	1.6123	0.152	0.013	1	1	TRUE
HDAC2	non-TF	0.00399729	1.54402	0.152	0.013	1	1	TRUE
ABI1	non-TF	0.00400557	1.60354	0.212	0.039	1	1	TRUE
EZR	non-TF	0.00400557	1.57463	0.212	0.039	1	1	TRUE
AZIN1	non-TF	0.00400557	1.53762	0.212	0.039	1	1
HSD17B12	non-TF	0.00410171	1.35685	0.273	0.066	1	1
CXCL2	non-TF	0.00415305	3.07697	0.182	0.026	1	1	TRUE
EAPP	non-TF	0.00415305	1.84337	0.182	0.026	1	1
MYL12A	non-TF	0.00415305	1.65416	0.182	0.026	1	1
EBF1	TF	0.00415305	1.62853	0.182	0.026	1	1
THUMPD3-AS1	non-TF	0.0042139	1.53757	0.152	0.013	1	1
UBL5	non-TF	0.0042355	1.18275	0.455	0.171	1	1
CLDN4	non-TF	0.00425847	1.26723	0.242	0.053	1	1
JUN	TF	0.00442183	1.62857	0.697	0.421	1	1	TRUE
EPB41L4A-AS1	non-TF	0.0044411	1.43031	0.152	0.013	1	1
MIR22HG	non-TF	0.0044411	1.39278	0.152	0.013	1	1
IQGAP1	non-TF	0.0044411	1.30652	0.152	0.013	1	1
TRAK1	non-TF	0.0044411	1.16316	0.152	0.013	1	1
ZNF395	TF	0.0044411	1.13085	0.152	0.013	1	1
PFDN5	non-TF	0.0044411	1.09013	0.152	0.013	1	1
MGA	TF	0.0044411	1.05296	0.152	0.013	1	1	TRUE
USP1	non-TF	0.0044411	0.96452	0.152	0.013	1	1	TRUE
ZMYND19	non-TF	0.00459582	1.34139	0.242	0.053	1	1
CNKSR3	non-TF	0.00475446	-2.80317	0	0.211	1	1
ICAM1	non-TF	0.00475446	-3.01204	0	0.211	1	1	TRUE
H3F3A	non-TF	0.00475594	1.27144	0.333	0.105	1	1
NEDD4L	non-TF	0.00476454	1.82934	0.182	0.026	1	1	TRUE
ID4	TF	0.00492543	1.57219	0.212	0.039	1	1
PRDX1	non-TF	0.00495719	1.24206	0.242	0.053	1	1	TRUE
GABARAPL1	non-TF	0.0049858	1.66549	0.182	0.026	1	1
ADAM9	non-TF	0.0049858	1.35528	0.182	0.026	1	1	TRUE
LDLR	non-TF	0.0049858	1.34685	0.182	0.026	1	1	TRUE
TOMM34	non-TF	0.0049858	1.23505	0.182	0.026	1	1
HUWE1	non-TF	0.00498787	1.10344	0.273	0.066	1	1
ENO1	non-TF	0.00499451	-2.03824	0.091	0.342	1	1
TTC1	non-TF	0.00521631	1.09274	0.182	0.026	1	1
RSRC2	non-TF	0.00523401	1.11803	0.394	0.145	1	1
RPL23	non-TF	0.00525351	0.857982	0.545	0.211	1	1
LAMC2	non-TF	0.00530041	0.836944	0.333	0.105	1	1	TRUE
SPATS2L	non-TF	0.00534406	1.2266	0.242	0.053	1	1
ZCCHC3	non-TF	0.00545641	1.51291	0.182	0.026	1	1
UBXN7	non-TF	0.00545641	1.31012	0.182	0.026	1	1
RBM25	non-TF	0.00554088	0.960135	0.273	0.066	1	1
CLK1	non-TF	0.00554755	0.984773	0.242	0.053	1	1	TRUE
JMJD1C	non-TF	0.00556515	1.30253	0.212	0.039	1	1
RPL13	non-TF	0.00565931	-1.38229	0.273	0.513	1	1	TRUE
RBM5	non-TF	0.00570644	1.2394	0.182	0.026	1	1
DSC2	non-TF	0.00570644	1.01348	0.182	0.026	1	1
ATP1A1	non-TF	0.00571588	-1.73198	0.152	0.408	1	1	TRUE
TOR1AIP1	non-TF	0.0057945	0.986166	0.212	0.039	1	1
SRF	TF	0.00596675	1.09168	0.182	0.026	1	1
ABI2	non-TF	0.00596675	1.06752	0.182	0.026	1	1
RHOQ	non-TF	0.00603233	1.2511	0.212	0.039	1	1
FOXO3	TF	0.00620063	0.8564	0.242	0.053	1	1	TRUE
ITGB1	non-TF	0.00641087	-2.09339	0.121	0.355	1	1	TRUE
TNC	non-TF	0.00652573	-2.76407	0	0.197	1	1	TRUE
IER2	non-TF	0.00684044	0.779069	0.545	0.237	1	1
B2M	non-TF	0.00701356	-1.25239	0.303	0.526	1	1	TRUE
CD63	non-TF	0.00711617	-1.76522	0.333	0.5	1	1	TRUE
PFDN2	non-TF	0.00732753	1.38023	0.273	0.079	1	1
ZFP36L1	TF	0.00744415	0.892367	0.364	0.132	1	1
RPS27	non-TF	0.00824471	0.606027	0.848	0.566	1	1
CALM2	non-TF	0.00832815	1.11635	0.485	0.237	1	1
ACTB	non-TF	0.00866392	-0.935178	0.515	0.711	1	1	TRUE
SFPQ	TF	0.00891551	0.687211	0.455	0.171	1	1
FABP5	non-TF	0.00892389	-2.79335	0	0.184	1	1	TRUE
SNHG9	non-TF	0.00972207	1.58275	0.303	0.105	1	1
EGR1	TF	4.28726e-07	3.1186	0.889	0.363	0.00577879	2	TRUE
NR4A2	TF	2.19828e-06	2.92817	0.389	0.033	0.0296307	2
GADD45B	non-TF	6.8738e-06	2.743	0.5	0.088	0.092652	2
KDM6B	non-TF	1.97861e-05	1.83141	0.667	0.198	0.266697	2	TRUE
NR4A1	TF	3.74245e-05	2.24795	0.5	0.11	0.504444	2	TRUE
EGR3	TF	4.56672e-05	2.57963	0.444	0.088	0.615548	2
PIM3	non-TF	4.61164e-05	2.00746	0.444	0.077	0.621603	2	TRUE
AC016831.1	non-TF	4.6702e-05	2.70001	0.278	0.022	0.629497	2
ABCA1	non-TF	5.27938e-05	2.52204	0.5	0.132	0.711608	2	TRUE
STAMBP	non-TF	8.99714e-05	2.44003	0.167	0	1	2
TGS1	non-TF	8.99714e-05	2.25834	0.167	0	1	2
CWC25	non-TF	8.99714e-05	2.11176	0.167	0	1	2
ZNF14	TF	8.99714e-05	2.10299	0.167	0	1	2
HEY2	TF	8.99714e-05	1.90566	0.167	0	1	2
FHOD1	non-TF	8.99714e-05	1.88427	0.167	0	1	2
RRAGA	non-TF	8.99714e-05	1.83607	0.167	0	1	2
BRD9	non-TF	0.000112947	2.28614	0.222	0.011	1	2	TRUE
SERPINE1	non-TF	0.000130844	1.94456	0.444	0.088	1	2	TRUE
SPRY2	non-TF	0.000134319	1.72329	0.667	0.22	1	2
ATP6V1B2	non-TF	0.000257156	2.54003	0.278	0.033	1	2	TRUE
AKAP12	non-TF	0.000337224	1.49801	0.722	0.297	1	2
SF3B1	non-TF	0.000339673	2.19625	0.333	0.055	1	2	TRUE
CSRNP1	TF	0.000393449	2.00754	0.5	0.143	1	2
ZBTB38	TF	0.000405986	2.42026	0.333	0.055	1	2
HES1	TF	0.000424863	2.40153	0.444	0.121	1	2	TRUE
SERTAD1	non-TF	0.000437311	1.74964	0.389	0.077	1	2
ETS1	TF	0.000449151	1.60916	0.5	0.132	1	2
FOSL2	TF	0.000707357	2.75723	0.333	0.066	1	2
ARC	non-TF	0.000747077	2.23999	0.333	0.066	1	2
TOB1	non-TF	0.000793074	1.85643	0.222	0.022	1	2	TRUE
RASSF8	non-TF	0.000879009	1.93574	0.333	0.066	1	2
GEM	non-TF	0.000894488	1.78486	0.611	0.308	1	2	TRUE
CLCF1	non-TF	0.000910162	2.12942	0.278	0.044	1	2
UTP11	non-TF	0.000967465	1.96191	0.278	0.044	1	2
IL1A	non-TF	0.00102809	1.84398	0.278	0.044	1	2	TRUE
RIPOR1	non-TF	0.00103227	1.71075	0.333	0.066	1	2
CHL1	non-TF	0.00108862	1.77355	0.333	0.066	1	2
LCAT	non-TF	0.0012848	2.60304	0.167	0.011	1	2	TRUE
SPRY4	non-TF	0.0012848	2.39322	0.167	0.011	1	2
TIFA	non-TF	0.0012848	2.03534	0.167	0.011	1	2
EGR2	TF	0.0013892	2.81651	0.333	0.077	1	2	TRUE
CNRIP1	non-TF	0.00140171	2.10965	0.167	0.011	1	2
ABCE1	non-TF	0.00140171	1.65103	0.167	0.011	1	2
CCR7	non-TF	0.00148842	2.9353	0.111	0	1	2	TRUE
EMD	non-TF	0.00148842	2.68921	0.111	0	1	2
MRPL17	non-TF	0.00148842	2.44328	0.111	0	1	2
IL1R1	non-TF	0.00148842	2.07243	0.111	0	1	2	TRUE
AC104984.3	non-TF	0.00148842	2.04549	0.111	0	1	2
ATP10B	non-TF	0.00148842	2.03723	0.111	0	1	2
GMPS	non-TF	0.00148842	2.03473	0.111	0	1	2
PTPRN	non-TF	0.00148842	1.99368	0.111	0	1	2
GOLGA7B	non-TF	0.00148842	1.99269	0.111	0	1	2
DNAL1	non-TF	0.00148842	1.99269	0.111	0	1	2
IER5	non-TF	0.00148842	1.97534	0.111	0	1	2
CCNB1IP1	non-TF	0.00148842	1.95082	0.111	0	1	2
DUSP8	non-TF	0.00148842	1.95062	0.111	0	1	2
AKAP8L	non-TF	0.00148842	1.89428	0.111	0	1	2
DMPK	non-TF	0.00148842	1.88059	0.111	0	1	2	TRUE
AL445524.1	non-TF	0.00148842	1.87784	0.111	0	1	2
MTAP	non-TF	0.00148842	1.85871	0.111	0	1	2	TRUE
NEMP1	non-TF	0.00148842	1.85871	0.111	0	1	2
PAQR5	non-TF	0.00148842	1.80119	0.111	0	1	2
SGMS1-AS1	non-TF	0.00148842	1.79179	0.111	0	1	2
PSMG2	non-TF	0.00148842	1.75043	0.111	0	1	2
DESI1	non-TF	0.00148842	1.74755	0.111	0	1	2
RBMX2	non-TF	0.00148842	1.74334	0.111	0	1	2
CDK11A	non-TF	0.00148842	1.7249	0.111	0	1	2
NAA25	non-TF	0.00148842	1.71372	0.111	0	1	2
ETV3	TF	0.00148842	1.71175	0.111	0	1	2
TNFRSF10D	non-TF	0.00148842	1.71175	0.111	0	1	2
ERN1	non-TF	0.00148842	1.6959	0.111	0	1	2	TRUE
THAP2	TF	0.00148842	1.68726	0.111	0	1	2
MPHOSPH9	non-TF	0.00148842	1.65571	0.111	0	1	2
FHL2	non-TF	0.00148842	1.65175	0.111	0	1	2	TRUE
RTL10	non-TF	0.00148842	1.65175	0.111	0	1	2
EXOSC3	non-TF	0.00148842	1.63314	0.111	0	1	2
CTDSP1	non-TF	0.00148842	1.59575	0.111	0	1	2	TRUE
TULP4	TF	0.00148842	1.53155	0.111	0	1	2
ZDHHC17	non-TF	0.00148842	1.44857	0.111	0	1	2
C18orf25	non-TF	0.00148842	1.44491	0.111	0	1	2
PDE12	non-TF	0.00148842	1.42302	0.111	0	1	2
SPECC1	non-TF	0.00148842	1.42302	0.111	0	1	2
FBXO28	non-TF	0.00148842	1.39646	0.111	0	1	2
PLEKHO2	non-TF	0.00148842	1.39646	0.111	0	1	2
GRASP	non-TF	0.00148842	1.32639	0.111	0	1	2
ELP2	non-TF	0.00148842	1.32639	0.111	0	1	2
PLP1	non-TF	0.00148842	1.32194	0.111	0	1	2
YJEFN3	non-TF	0.00148842	1.23885	0.111	0	1	2
GYG1	non-TF	0.00148842	1.20895	0.111	0	1	2
SYNPO	non-TF	0.00148842	0.993073	0.111	0	1	2
MARK2	non-TF	0.00148842	0.993073	0.111	0	1	2	TRUE
OSBPL10	non-TF	0.00152835	2.00456	0.167	0.011	1	2
C16orf58	non-TF	0.00152835	1.88932	0.167	0.011	1	2
TPCN2	non-TF	0.00152835	1.72885	0.167	0.011	1	2	TRUE
STX4	non-TF	0.00152835	1.59909	0.167	0.011	1	2	TRUE
TNKS	non-TF	0.00166546	1.61734	0.167	0.011	1	2	TRUE
TWIST1	TF	0.00166546	1.48061	0.167	0.011	1	2
PSMA2	non-TF	0.00166546	1.4174	0.167	0.011	1	2	TRUE
RND3	non-TF	0.00172222	1.70319	0.5	0.165	1	2
NAMPT	non-TF	0.00173192	1.38825	0.556	0.209	1	2	TRUE
ATP5F1E	non-TF	0.00195296	-1.92145	0.333	0.615	1	2	TRUE
HIST1H4C	non-TF	0.00208429	1.84807	0.778	0.495	1	2
C16orf72	non-TF	0.00249274	1.51978	0.389	0.11	1	2
CREB5	TF	0.0025036	1.74434	0.333	0.077	1	2
CDC42	non-TF	0.0025036	1.30765	0.333	0.077	1	2	TRUE
HOOK3	non-TF	0.00265017	1.87324	0.222	0.033	1	2
C11orf58	non-TF	0.00275428	1.29944	0.333	0.077	1	2
BHLHE41	TF	0.00298767	2.04257	0.333	0.088	1	2
EML4	non-TF	0.00300491	1.52005	0.222	0.033	1	2	TRUE
IAH1	non-TF	0.00319806	1.81444	0.222	0.033	1	2
ID2	TF	0.00319806	1.61174	0.222	0.033	1	2
MCAM	non-TF	0.00340246	1.44085	0.222	0.033	1	2	TRUE
SLC1A5	non-TF	0.00348442	1.30711	0.333	0.077	1	2	TRUE
IL11	non-TF	0.00362596	1.54782	0.278	0.055	1	2	TRUE
C1orf56	non-TF	0.00390054	1.73927	0.5	0.22	1	2
IER3	non-TF	0.00437695	0.961665	0.722	0.33	1	2
PHLDA1	non-TF	0.00442702	1.503	0.444	0.154	1	2
ATF4	TF	0.00467485	1.55877	0.333	0.088	1	2	TRUE
IPO7	non-TF	0.00545315	1.89166	0.278	0.066	1	2	TRUE
CDC42SE1	non-TF	0.00590711	1.28536	0.444	0.154	1	2
TCEAL9	non-TF	0.00598694	1.17728	0.611	0.297	1	2
ELL2	non-TF	0.00629256	1.93347	0.278	0.066	1	2
DHX15	non-TF	0.00629256	1.29609	0.278	0.066	1	2
ADPRM	non-TF	0.00644863	2.02522	0.167	0.022	1	2
ZNHIT6	non-TF	0.00644863	1.93717	0.167	0.022	1	2
PRPF38B	non-TF	0.00659859	1.93012	0.222	0.044	1	2
YBX1	TF	0.00686591	1.68298	0.389	0.132	1	2
JAG1	non-TF	0.00690193	1.51324	0.167	0.022	1	2	TRUE
TAOK1	non-TF	0.00696733	2.40676	0.222	0.044	1	2	TRUE
MKLN1	non-TF	0.00696733	1.42687	0.222	0.044	1	2
RELB	TF	0.0073026	1.22898	0.444	0.165	1	2
ITPRIP	non-TF	0.00735447	2.32244	0.222	0.044	1	2
INO80	non-TF	0.00738365	1.98938	0.167	0.022	1	2
ATF3	TF	0.00738365	1.77558	0.167	0.022	1	2	TRUE
LHFPL2	non-TF	0.00738365	1.64763	0.167	0.022	1	2
NR4A3	TF	0.00789532	2.60052	0.167	0.022	1	2	TRUE
SMAD3	TF	0.00789532	1.69956	0.167	0.022	1	2	TRUE
LEMD3	non-TF	0.00789532	1.64092	0.167	0.022	1	2
ELMSAN1	TF	0.00789532	1.55664	0.167	0.022	1	2
SMC5	non-TF	0.00789532	1.52249	0.167	0.022	1	2
EIF3D	non-TF	0.00789532	1.42861	0.167	0.022	1	2
CDC37	non-TF	0.00795266	1.2577	0.278	0.066	1	2	TRUE
VGF	non-TF	0.00803866	3.01024	0.333	0.099	1	2
PSME4	non-TF	0.00840733	1.52055	0.222	0.044	1	2	TRUE
BAG1	non-TF	0.00843853	1.61723	0.167	0.022	1	2
SBNO1	non-TF	0.00843853	1.57985	0.167	0.022	1	2
ZNF331	TF	0.00843853	1.48529	0.167	0.022	1	2
USP9X	non-TF	0.00843853	1.47924	0.167	0.022	1	2
STRN4	non-TF	0.00843853	1.38703	0.167	0.022	1	2
AAED1	non-TF	0.00843853	1.36543	0.167	0.022	1	2
GORAB	non-TF	0.00863431	2.00984	0.222	0.044	1	2
SYT11	non-TF	0.00886521	1.44653	0.222	0.044	1	2
SMARCA1	TF	0.00901491	1.50462	0.167	0.022	1	2
USP38	non-TF	0.00901491	1.26783	0.167	0.022	1	2
ZFYVE16	non-TF	0.00910319	1.56425	0.222	0.044	1	2
FOSL1	TF	0.00919579	1.087	0.556	0.253	1	2	TRUE
UPP1	non-TF	0.00959467	1.38929	0.222	0.044	1	2
SECISBP2L	non-TF	0.0096262	1.37849	0.167	0.022	1	2
MOB4	non-TF	0.0096262	1.35338	0.167	0.022	1	2
NFKBIA	non-TF	0.00986196	1.35313	0.556	0.286	1	2	TRUE
RPL7A	non-TF	0.000125333	2.14217	0.448	0.137	1	3
RPS2	non-TF	0.000272129	1.82659	0.534	0.294	1	3	TRUE
SON	TF	0.000295406	-1.30954	0.19	0.549	1	3
RCAN1	non-TF	0.000340504	2.77039	0.293	0.039	1	3
FOSB	TF	0.00034384	-1.41893	0.069	0.373	1	3
GPM6B	non-TF	0.000355458	3.00174	0.224	0	1	3
HSP90B1	non-TF	0.000379943	2.35568	0.431	0.176	1	3	TRUE
DUSP1	non-TF	0.000450005	-2.13562	0.052	0.314	1	3	TRUE
ZFP36	non-TF	0.000640491	-1.99864	0.052	0.294	1	3
CTNNAL1	non-TF	0.00073911	-1.84256	0.069	0.333	1	3
TXLNG	non-TF	0.000918557	-2.02978	0	0.176	1	3
MT-ND2	non-TF	0.00150853	0.636866	0.879	0.804	1	3	TRUE
SRSF5	non-TF	0.00169478	-2.31166	0.034	0.235	1	3
EIF5	non-TF	0.00173603	-1.28313	0.155	0.451	1	3
TRIB1	non-TF	0.00178114	-1.4746	0.121	0.373	1	3
TMF1	TF	0.00187478	-1.817	0	0.157	1	3
BEX2	non-TF	0.00187478	-1.94066	0	0.157	1	3
CMIP	non-TF	0.00187478	-2.13926	0	0.157	1	3
EFNB2	non-TF	0.00187478	-2.21295	0	0.157	1	3
NR2F1	TF	0.00202607	2.41592	0.172	0	1	3
MORF4L1	non-TF	0.00220571	-1.55637	0.103	0.353	1	3
SF3B4	non-TF	0.00224711	-1.88544	0.017	0.196	1	3
P4HB	non-TF	0.00238872	2.46354	0.207	0.02	1	3	TRUE
UBE2R2	non-TF	0.00242753	-1.63365	0.017	0.196	1	3
PPP1R15A	non-TF	0.00246589	-0.845042	0.362	0.686	1	3
TAGLN2	non-TF	0.00276818	2.2434	0.31	0.098	1	3
SNHG8	non-TF	0.00284465	-1.14307	0.086	0.333	1	3
DDX3X	non-TF	0.00359746	-1.39633	0.086	0.314	1	3
MDM4	non-TF	0.00380304	-1.53396	0	0.137	1	3	TRUE
PARD6B	non-TF	0.00380304	-1.69395	0	0.137	1	3
PPP1R10	non-TF	0.00380304	-1.7917	0	0.137	1	3
TCEAL7	non-TF	0.00380304	-2.0862	0	0.137	1	3
FOS	TF	0.00404632	-2.18924	0.172	0.392	1	3	TRUE
CALM1	non-TF	0.00429061	-1.82439	0.017	0.176	1	3	TRUE
FGFR1	non-TF	0.00455821	-1.41452	0.121	0.353	1	3	TRUE
COQ10B	non-TF	0.00462996	-1.64041	0.017	0.176	1	3
CAST	non-TF	0.00491103	-1.34326	0.069	0.275	1	3	TRUE
KLF10	TF	0.00495719	-1.84338	0.121	0.333	1	3
WEE1	non-TF	0.00518468	-1.36799	0.017	0.176	1	3	TRUE
HSPE1	non-TF	0.00604203	-1.50163	0.103	0.333	1	3	TRUE
DAG1	non-TF	0.00627027	2.25182	0.138	0	1	3
XPO1	non-TF	0.00627027	2.0321	0.138	0	1	3	TRUE
ZFP91	TF	0.00628458	-1.72268	0.034	0.196	1	3
RPSA	non-TF	0.0066171	1.96948	0.293	0.098	1	3	TRUE
RPL8	non-TF	0.0071015	1.50749	0.397	0.216	1	3
COP1	non-TF	0.00768125	-1.46164	0	0.118	1	3	TRUE
SYF2	non-TF	0.00768125	-1.52717	0	0.118	1	3
PHF1	non-TF	0.00768125	-1.55548	0	0.118	1	3
GLIPR1	non-TF	0.00768125	-1.59511	0	0.118	1	3	TRUE
SAMD8	non-TF	0.00768125	-1.79485	0	0.118	1	3
HERC4	non-TF	0.00768125	-1.99815	0	0.118	1	3
USP34	non-TF	0.00768702	-1.55642	0.034	0.196	1	3
ATP13A3	non-TF	0.00794686	-1.52593	0.034	0.196	1	3
KAT6A	non-TF	0.00812927	-1.31606	0.052	0.235	1	3
CLIP1	non-TF	0.00813553	-1.91382	0.017	0.157	1	3
THBS1	non-TF	0.0087686	-1.57552	0.017	0.157	1	3	TRUE
ZBTB21	TF	0.0087686	-1.64151	0.017	0.157	1	3
ZSWIM6	non-TF	0.00910135	-1.63562	0.017	0.157	1	3
SLC38A2	non-TF	0.00919773	-1.10109	0.121	0.333	1	3	TRUE
CPEB4	non-TF	0.00936488	-1.19994	0.034	0.196	1	3
UBE2H	non-TF	0.00936488	-1.35199	0.034	0.196	1	3
BRD4	non-TF	0.00943249	-0.75612	0.052	0.235	1	3	TRUE
RPS8	non-TF	0.00976744	1.11357	0.5	0.314	1	3
DDIT4	non-TF	0.00980085	-1.71631	0.017	0.157	1	3	TRUE
