# Supplementary material for: Revealing heterogeneity and damage response in the adult human utricle
Source: Research Square preprint supplement (doi:10.21203/rs.3.rs-3649756/v1), 2024-03-11
Supplement: Supplementary file 4 [file 8044f23b777171ae19a78fcd.xlsx]

## Sheet: Table S4. Type I HC
Table S4. Differential expression analysis between human and mouse type I HC, Wilcoxon rank-sum test with a Bonferroni Padj < .05, log2 FC > |2|. Related to Figure 4a.
Transcription factors (TF) were detected using AnimalTFDB 3.0, druggable targets using DGIdb 4.0.
Gene	TF	p_val	avg_log2FC	pct.1	pct.2	p_val_adj	Type_I_enriched	Drug
SKP1	non-TF	2.92343e-17	5.90204	1	0	5.95065e-13
S100A13	non-TF	1.08545e-16	4.98201	1	0.571	2.20943e-12
SCGB2A1	non-TF	4.54091e-16	4.91199	0.956	0	9.24302e-12
NDUFB2	non-TF	8.58732e-17	4.02512	1	0.371	1.74795e-12		TRUE
COX17	non-TF	9.62362e-13	3.68418	0.926	0.886	1.95889e-08
C1orf232	non-TF	7.25781e-14	3.67373	0.868	0	1.47733e-09
ATP5F1E	non-TF	7.83273e-16	3.59858	0.985	0.857	1.59435e-11		TRUE
UQCRQ	non-TF	3.75128e-14	3.58874	0.956	0.914	7.63574e-10
SNCG	non-TF	2.37706e-13	3.51337	0.912	0.371	4.8385e-09
JUND	TF	5.08168e-09	3.33004	0.838	0.829	0.000103438		TRUE
UQCRB	non-TF	4.4223e-14	3.28652	0.956	0.971	9.00159e-10		TRUE
S100A1	non-TF	1.20839e-16	3.26809	1	0.971	2.45967e-12
FBXO2	non-TF	2.04158e-16	3.26196	1	1	4.15563e-12
NDUFA4	non-TF	1.61788e-16	3.23045	1	0.971	3.2932e-12		TRUE
C20orf85	non-TF	1.41962e-11	3.18428	0.765	0	2.88964e-07
PTRH1	non-TF	6.76048e-12	3.15985	0.838	0.2	1.3761e-07
LMO7	non-TF	2.55905e-11	3.14818	0.765	0.029	5.20895e-07
HOPX	TF	3.97235e-09	3.14561	0.838	0.8	8.08572e-05	TRUE
MINDY4B	non-TF	1.41962e-11	3.14497	0.765	0	2.88964e-07
TSTD1	non-TF	2.66196e-11	3.14369	0.794	0.086	5.41841e-07
FRMD4B	non-TF	5.69545e-11	3.13903	0.735	0	1.15931e-06
ELOB	non-TF	2.86158e-11	3.13112	0.75	0	5.82474e-07
GAMT	non-TF	2.55905e-11	3.12081	0.765	0.029	5.20895e-07
SELENOK	non-TF	3.36197e-12	3.06825	0.794	0	6.84328e-08
FAU	non-TF	1.42198e-12	3.03374	0.926	0.971	2.89445e-08
NDUFC2	non-TF	5.77789e-12	3.0103	0.912	0.914	1.17609e-07		TRUE
H2AFZ	non-TF	3.36146e-12	2.99322	0.794	0	6.84224e-08
C2orf40	non-TF	2.95034e-10	2.99153	0.75	0.114	6.00542e-06
OST4	non-TF	2.76914e-12	2.98467	0.912	0.771	5.63659e-08
UQCR10	non-TF	1.96734e-11	2.97516	0.897	0.829	4.00451e-07		TRUE
FAM183A	non-TF	4.50967e-14	2.9664	0.956	0.886	9.17943e-10
PKIB	non-TF	1.09717e-07	2.96438	0.75	0.486	0.00223329
PPP1R27	non-TF	1.32143e-12	2.94609	0.956	0.943	2.68978e-08	TRUE
TMA7	non-TF	6.44247e-15	2.91165	0.971	0.971	1.31137e-10
WFDC2	non-TF	2.42185e-09	2.9084	0.721	0.143	4.92967e-05
UBL5	non-TF	2.4195e-09	2.907	0.765	0.286	4.9249e-05
ATP6V1F	non-TF	6.64751e-13	2.88097	0.941	0.8	1.3531e-08
KRT10	non-TF	4.29763e-08	2.86756	0.779	0.571	0.000874783		TRUE
PCP4	non-TF	1.06499e-12	2.85819	0.956	0.829	2.16779e-08	TRUE
VSIG10L2	non-TF	5.05234e-09	2.84798	0.632	0	0.00010284
LAPTM4A	non-TF	3.49953e-11	2.80173	0.853	0.429	7.12329e-07
PPDPF	non-TF	4.73364e-07	2.79113	0.721	0.457	0.00963533
CIB2	non-TF	2.60623e-11	2.78601	0.897	0.686	5.30498e-07
SRP14	non-TF	2.37486e-14	2.78443	0.971	0.886	4.83404e-10
COX7C	non-TF	1.31683e-08	2.77966	0.838	0.943	0.00026804
BEX3	non-TF	1.48572e-09	2.76246	0.662	0	3.02419e-05
NDUFB1	non-TF	2.75468e-09	2.75992	0.647	0	5.60716e-05		TRUE
CLTA	non-TF	1.75848e-07	2.75188	0.794	0.771	0.0035794
ENC1	non-TF	2.86158e-11	2.74655	0.75	0	5.82474e-07	TRUE
COX5B	non-TF	6.66202e-10	2.74441	0.868	0.914	1.35605e-05
PCSK1N	non-TF	1.11983e-10	2.69813	0.721	0	2.27942e-06
SERF2	non-TF	1.14603e-11	2.67737	0.912	0.943	2.33274e-07
CRIP3	non-TF	5.68286e-08	2.63311	0.765	0.486	0.00115675
ATP5MD	non-TF	7.92114e-10	2.62654	0.676	0	1.61235e-05
ATP5MC2	non-TF	7.4892e-10	2.61693	0.868	0.943	1.52443e-05
FKBP2	non-TF	1.5088e-08	2.58748	0.779	0.486	0.000307117
SYT1	non-TF	2.75502e-09	2.57928	0.647	0	5.60785e-05		TRUE
COX7A2	non-TF	1.31683e-08	2.57825	0.838	0.943	0.00026804
ATOX1	non-TF	4.16569e-07	2.5327	0.735	0.514	0.00847926
CAMK2N1	non-TF	1.47807e-07	2.52127	0.809	0.8	0.00300861
CST3	non-TF	2.26141e-10	2.48628	0.882	0.8	4.60311e-06		TRUE
COPS9	non-TF	5.05234e-09	2.48298	0.632	0	0.00010284
AP3S1	non-TF	1.96939e-10	2.47413	0.882	0.6	4.00869e-06
C9orf116	non-TF	9.1649e-09	2.45261	0.618	0	0.000186552
NDUFC1	non-TF	1.65818e-08	2.42979	0.838	0.971	0.000337523		TRUE
PRDX2	non-TF	3.16941e-13	2.38714	0.956	0.943	6.45134e-09
PRDX1	non-TF	5.59172e-13	2.38642	0.956	1	1.13819e-08		TRUE
SELENOW	non-TF	2.62694e-07	2.38517	0.529	0	0.00534713
SELENOM	non-TF	7.43504e-07	2.36105	0.5	0	0.015134
SMPX	non-TF	8.84504e-13	2.36067	0.971	1	1.80041e-08
TOMM7	non-TF	4.97646e-09	2.35703	0.853	1	0.000101296
ABCA5	non-TF	1.39254e-12	2.35339	0.956	1	2.83452e-08		TRUE
ATP5MPL	non-TF	5.05234e-09	2.34844	0.632	0	0.00010284
DUT	non-TF	1.26666e-08	2.32409	0.662	0.086	0.00025783		TRUE
FAM19A3	non-TF	9.1649e-09	2.32075	0.618	0	0.000186552
SNU13	non-TF	8.93414e-08	2.32052	0.559	0	0.00181854
NACA	non-TF	1.22231e-08	2.31127	0.853	0.943	0.000248802
EID1	non-TF	1.05097e-07	2.2918	0.809	0.743	0.00213925
SEM1	non-TF	4.44006e-07	2.27084	0.515	0	0.00903774		TRUE
UQCR11	non-TF	8.6682e-10	2.23242	0.882	1	1.76441e-05
SPCS1	non-TF	9.02466e-09	2.22055	0.838	0.857	0.000183697
CTXND2	non-TF	2.92082e-08	2.193	0.588	0	0.000594534
HLA-DQB1	non-TF	7.43504e-07	2.17685	0.5	0	0.015134		TRUE
PLA2G16	non-TF	8.93511e-08	2.17289	0.559	0	0.00181874
SCAND1	non-TF	2.26075e-06	2.17122	0.559	0.114	0.0460176
TIMP1	non-TF	1.23372e-06	2.15917	0.485	0	0.0251123
ANAPC16	non-TF	3.79454e-07	2.13125	0.794	0.886	0.00772379
PTPRZ1	non-TF	8.96839e-10	2.10187	0.853	0.286	1.82551e-05	TRUE	TRUE
TCTEX1D2	non-TF	1.53934e-07	2.09077	0.544	0	0.00313333
AKR1A1	non-TF	1.0353e-09	2.03199	0.897	1	2.10735e-05		TRUE
RSPH1	non-TF	1.73029e-10	1.97919	0.912	0.914	3.522e-06
COX8A	non-TF	1.64293e-08	1.97185	0.853	1	0.000334418
OCIAD2	non-TF	1.16683e-07	1.97184	0.794	0.486	0.00237509
H1FX	non-TF	2.02895e-06	1.96417	0.471	0	0.0412993
C11orf97	non-TF	1.11403e-06	1.94655	0.515	0.029	0.0226762
MINOS1	non-TF	2.02875e-06	1.94451	0.471	0	0.0412953
COX4I1	non-TF	2.85767e-10	1.9312	0.912	0.943	5.81678e-06
FTH1	non-TF	1.92638e-16	1.92044	1	1	3.92115e-12		TRUE
SEC62	non-TF	1.04002e-10	1.91344	0.926	0.714	2.11695e-06
DYNLL1	non-TF	1.28962e-09	1.85168	0.912	1	2.62502e-05
CCNI	non-TF	4.77879e-10	1.79255	0.926	0.914	9.72723e-06
PFDN5	non-TF	1.02836e-09	1.77012	0.882	0.971	2.09323e-05
FAM213A	non-TF	1.23372e-06	1.74618	0.485	0	0.0251123
PARK7	non-TF	1.96604e-06	1.63881	0.824	0.971	0.0400186
MYL6	non-TF	1.49293e-09	1.55409	0.897	0.971	3.03886e-05
EIF1	non-TF	7.3343e-10	1.49628	0.956	1	1.4929e-05
TPT1	non-TF	5.96416e-09	1.48453	0.926	1	0.0001214		TRUE
SOD1	non-TF	3.55575e-08	1.24335	0.912	1	0.000723773		TRUE
COX6A1	non-TF	1.53875e-09	1.2278	0.985	1	3.13213e-05
MALAT1	non-TF	8.40994e-13	1.14569	0.985	1	1.71184e-08		TRUE
MLF1	non-TF	5.24049e-07	-1.00045	0.397	1	0.010667
DHX40	non-TF	3.25751e-19	-1.00084	0.029	0.971	6.63067e-15
TMEM138	non-TF	1.93653e-09	-1.00116	0	0.457	3.9418e-05
MTF1	TF	3.61861e-18	-1.00362	0.015	0.886	7.36568e-14		TRUE
XRN1	non-TF	9.00726e-13	-1.00472	0.059	0.8	1.83343e-08
SRF	TF	1.13229e-14	-1.00559	0.015	0.743	2.30478e-10
ARRDC4	non-TF	1.93653e-09	-1.00593	0	0.457	3.9418e-05
PPP2R3A	non-TF	7.50711e-16	-1.00784	0	0.743	1.52807e-11
ME1	non-TF	8.39287e-14	-1.00788	0.059	0.857	1.70837e-09
PGPEP1	non-TF	1.95358e-20	-1.0087	0.015	0.971	3.9765e-16
RCC2	non-TF	3.72392e-15	-1.00908	0	0.714	7.58004e-11
KIAA1958	non-TF	1.77903e-06	-1.00927	0.029	0.4	0.0362121
BMT2	non-TF	8.04099e-20	-1.00958	0.029	1	1.63674e-15
USP34	non-TF	7.17148e-08	-1.01093	0.191	0.857	0.00145976
SYT11	non-TF	7.46137e-20	-1.0122	0.029	1	1.51876e-15
ANKS3	non-TF	1.46846e-16	-1.01269	0	0.771	2.98904e-12
PHF20	non-TF	8.02862e-09	-1.01467	0.191	0.886	0.000163423
NEAT1	non-TF	1.46075e-10	-1.01609	0.088	0.771	2.97336e-06
SOCS4	non-TF	3.4496e-08	-1.01644	0.088	0.657	0.000702166
TGFBR1	non-TF	6.55941e-22	-1.01765	0	0.971	1.33517e-17		TRUE
DAG1	non-TF	2.30342e-08	-1.01901	0.059	0.571	0.00046886
CNOT8	non-TF	7.38926e-07	-1.01901	0.044	0.457	0.0150408
CDAN1	non-TF	4.21584e-21	-1.01913	0	0.943	8.58135e-17
CHORDC1	non-TF	3.42399e-13	-1.01951	0.074	0.857	6.96953e-09
TOM1L2	non-TF	3.42399e-13	-1.01962	0.074	0.857	6.96953e-09
LRRC34	non-TF	1.34049e-09	-1.02048	0.015	0.514	2.72857e-05
UBR1	non-TF	1.31637e-12	-1.02054	0.044	0.743	2.67948e-08		TRUE
NSDHL	non-TF	3.09054e-09	-1.02117	0.059	0.629	6.29078e-05
IQUB	non-TF	1.99399e-08	-1.02292	0.176	0.857	0.000405877
FARP2	non-TF	1.42904e-09	-1.0234	0.015	0.514	2.9088e-05		TRUE
XPR1	non-TF	2.69479e-15	-1.02372	0.015	0.771	5.48525e-11
EPG5	non-TF	1.57053e-19	-1.02457	0	0.886	3.19681e-15
GNL2	non-TF	9.09567e-16	-1.02459	0.044	0.886	1.85142e-11
ELAVL1	non-TF	8.24075e-10	-1.02486	0.103	0.771	1.67741e-05		TRUE
C5orf15	non-TF	2.78542e-17	-1.02515	0	0.8	5.66972e-13
CUL5	non-TF	2.15809e-09	-1.02694	0.118	0.771	4.39279e-05
TRIM71	non-TF	2.40616e-11	-1.02723	0.015	0.6	4.89774e-07
ZMAT3	non-TF	4.72437e-19	-1.02735	0.015	0.914	9.61645e-15
OXR1	non-TF	4.25938e-09	-1.02796	0.044	0.571	8.66997e-05
YWHAE	non-TF	1.71128e-07	-1.02869	0.632	1	0.00348331		TRUE
CREBBP	non-TF	3.75306e-14	-1.03093	0.074	0.886	7.63936e-10		TRUE
TET2	TF	3.46214e-14	-1.03093	0.029	0.771	7.04718e-10		TRUE
TMEM216	non-TF	4.92743e-14	-1.03097	0.044	0.8	1.00298e-09
SF3B1	non-TF	5.32792e-07	-1.03098	0.353	1	0.010845		TRUE
SLC25A5	non-TF	1.6609e-08	-1.03133	0.294	1	0.000338077		TRUE
NAGA	non-TF	1.8045e-08	-1.03168	0.044	0.543	0.000367305
PPME1	non-TF	4.73804e-14	-1.03325	0.059	0.857	9.64429e-10		TRUE
TNFRSF12A	non-TF	2.05249e-09	-1.03479	0.088	0.714	4.17785e-05		TRUE
VCP	non-TF	2.35915e-12	-1.03553	0.132	0.971	4.80206e-08		TRUE
DHX32	non-TF	1.22868e-06	-1.03733	0	0.314	0.0250098
GID4	non-TF	1.67349e-20	-1.03743	0.015	0.971	3.4064e-16
AGBL2	non-TF	3.0526e-11	-1.03762	0	0.543	6.21356e-07
DYNC1H1	non-TF	1.44479e-07	-1.03805	0.235	0.914	0.00294086
KIAA0513	non-TF	1.22868e-06	-1.03898	0	0.314	0.0250098
KLHL42	non-TF	5.19507e-12	-1.03987	0.044	0.714	1.05746e-07
ATG14	non-TF	4.68399e-12	-1.04172	0.015	0.629	9.53426e-08
ELP2	non-TF	7.26801e-07	-1.04311	0.103	0.6	0.014794
ZYG11B	non-TF	1.69579e-16	-1.04454	0.074	1	3.45178e-12
SLC7A1	non-TF	1.57053e-19	-1.04547	0	0.886	3.19681e-15
NCBP3	non-TF	2.97522e-14	-1.04678	0.103	1	6.05605e-10
STRA6	non-TF	3.44445e-10	-1.04681	0.015	0.543	7.01119e-06
AACS	non-TF	2.88661e-11	-1.04776	0.044	0.686	5.87569e-07
HEATR6	non-TF	1.13526e-20	-1.04833	0.015	0.971	2.31083e-16
EIF4G2	non-TF	4.4475e-08	-1.04847	0.221	0.914	0.000905288
PLCE1	non-TF	1.37621e-06	-1.04971	0.25	0.886	0.0280128		TRUE
MAEA	non-TF	1.68938e-12	-1.04971	0	0.6	3.43872e-08
SAT1	non-TF	1.31717e-09	-1.05054	0.103	0.771	2.68111e-05
NR1D1	TF	1.2163e-16	-1.05057	0.015	0.829	2.47578e-12		TRUE
DAPK1	non-TF	1.93653e-09	-1.05187	0	0.457	3.9418e-05		TRUE
TAF1	non-TF	1.87484e-17	-1.05206	0.059	1	3.81624e-13		TRUE
ATRN	non-TF	1.95358e-20	-1.05209	0.015	0.971	3.9765e-16
SNRNP200	non-TF	6.29771e-15	-1.05267	0.088	0.971	1.2819e-10
TOMM70	non-TF	7.35886e-09	-1.05267	0	0.429	0.00014979
PAF1	non-TF	7.27649e-12	-1.05317	0	0.571	1.48113e-07
SLC35A4	non-TF	5.07133e-07	-1.05332	0.074	0.543	0.0103227
DAZAP2	non-TF	5.00681e-08	-1.05353	0.206	0.857	0.00101914
MAPK1	non-TF	3.67499e-10	-1.05369	0.015	0.543	7.48044e-06		TRUE
TOR1B	non-TF	5.01478e-08	-1.05417	0.015	0.429	0.00102076
XBP1	TF	1.23066e-10	-1.05521	0.074	0.743	2.50501e-06		TRUE
RAB33B	non-TF	9.85137e-23	-1.05527	0	1	2.00525e-18
CRIM1	non-TF	6.55941e-22	-1.05568	0	0.971	1.33517e-17
OSBPL6	non-TF	1.5828e-16	-1.05604	0.044	0.914	3.22179e-12
LRP6	non-TF	2.12686e-16	-1.05627	0.029	0.857	4.32923e-12
OSER1	non-TF	4.59522e-10	-1.05654	0.074	0.686	9.35358e-06
DRG1	non-TF	3.55216e-17	-1.05692	0.029	0.886	7.23041e-13
EXOC8	non-TF	4.61643e-18	-1.05702	0.044	0.971	9.39675e-14
NONO	non-TF	7.20669e-10	-1.05762	0.147	0.886	1.46692e-05
PI4KB	non-TF	2.67439e-18	-1.05819	0.029	0.943	5.44372e-14		TRUE
CDK20	non-TF	5.35866e-12	-1.05822	0.015	0.629	1.09076e-07		TRUE
IQCB1	non-TF	5.4045e-16	-1.05836	0.015	0.8	1.10009e-11
ZNF12	TF	6.7597e-17	-1.05844	0.029	0.886	1.37594e-12
METTL3	non-TF	1.24809e-10	-1.05905	0	0.514	2.54049e-06
FAAP100	non-TF	8.3926e-14	-1.05923	0	0.657	1.70831e-09
CSNK1G1	non-TF	1.79357e-14	-1.05926	0	0.686	3.65081e-10		TRUE
FAM13A	non-TF	2.75763e-11	-1.06008	0.029	0.629	5.61316e-07
PRR14L	non-TF	2.17711e-07	-1.06074	0.118	0.686	0.0044315
PAPOLA	non-TF	2.52089e-13	-1.0612	0.118	0.971	5.13126e-09		TRUE
RBM4B	non-TF	1.30394e-14	-1.06136	0.015	0.743	2.65417e-10
LRIG2	non-TF	1.8087e-13	-1.06197	0.029	0.743	3.68162e-09
LHFPL4	non-TF	6.92307e-20	-1.06302	0.029	1	1.40919e-15
DCAF11	non-TF	1.21283e-10	-1.06421	0.044	0.657	2.46872e-06
PPP2R5B	non-TF	2.84709e-09	-1.06422	0.029	0.543	5.79526e-05
AP2A2	non-TF	1.15813e-17	-1.06462	0.044	0.971	2.35737e-13
TMC2	non-TF	5.05302e-15	-1.06551	0.074	0.943	1.02854e-10
UPF3B	non-TF	3.27215e-15	-1.0669	0.059	0.914	6.66046e-11
PLPP3	non-TF	1.98151e-16	-1.06699	0.029	0.857	4.03337e-12
USP20	non-TF	2.78542e-17	-1.06791	0	0.8	5.66972e-13
AKAP13	non-TF	2.83435e-10	-1.06881	0.015	0.543	5.76933e-06		TRUE
MYO1H	non-TF	1.58698e-16	-1.07015	0.074	1	3.23031e-12		TRUE
PHF20L1	non-TF	2.11598e-13	-1.07036	0.118	0.971	4.30707e-09
ARF6	non-TF	1.20023e-16	-1.07143	0.044	0.914	2.44307e-12		TRUE
GBF1	non-TF	7.0291e-15	-1.07192	0.059	0.886	1.43077e-10
KLF9	TF	4.24883e-13	-1.07256	0.118	0.971	8.6485e-09
RASSF1	non-TF	7.35886e-09	-1.07542	0	0.429	0.00014979
GAA	non-TF	1.13229e-14	-1.07557	0.015	0.743	2.30478e-10		TRUE
CPSF7	non-TF	6.42422e-10	-1.0765	0.059	0.657	1.30765e-05
DOCK1	non-TF	2.27412e-13	-1.07666	0.015	0.686	4.62897e-09
WDFY3	non-TF	2.15203e-17	-1.07692	0.044	0.943	4.38045e-13
GPKOW	non-TF	3.07771e-10	-1.07824	0.044	0.629	6.26468e-06
NCS1	non-TF	6.4707e-16	-1.0809	0.044	0.886	1.31711e-11
DAP	non-TF	9.29731e-16	-1.08395	0.029	0.829	1.89247e-11
PGM2	non-TF	9.62171e-13	-1.08587	0.088	0.857	1.9585e-08
ZBTB21	TF	1.74039e-15	-1.08604	0.029	0.829	3.54255e-11
ULK4	non-TF	4.84987e-14	-1.08653	0.088	0.914	9.87192e-10
RAB11FIP3	non-TF	1.10699e-10	-1.08694	0.103	0.8	2.25328e-06
TPPP	non-TF	7.27649e-12	-1.08749	0	0.571	1.48113e-07
GOT2	non-TF	1.84771e-13	-1.08854	0.015	0.686	3.76101e-09
ANKRD24	non-TF	2.25174e-11	-1.08882	0.015	0.6	4.58342e-07
TOB2	non-TF	3.47627e-16	-1.09028	0.059	0.943	7.07595e-12
PARD3B	non-TF	1.84049e-17	-1.0917	0.015	0.857	3.74632e-13		TRUE
SEC24B	non-TF	1.58723e-17	-1.09273	0.015	0.857	3.23081e-13
ZNF423	TF	1.93653e-09	-1.09308	0	0.457	3.9418e-05		TRUE
MYO3B	non-TF	8.11944e-10	-1.09311	0.235	1	1.65271e-05
ART3	non-TF	3.0526e-11	-1.09515	0	0.543	6.21356e-07
BCL2	non-TF	4.04684e-16	-1.09541	0.015	0.8	8.23734e-12		TRUE
PDE4DIP	non-TF	1.24599e-07	-1.09767	0.029	0.457	0.00253622
USP25	non-TF	9.85137e-23	-1.09776	0	1	2.00525e-18
PRR15L	non-TF	2.665e-12	-1.10164	0.029	0.686	5.4246e-08
DHX33	non-TF	2.61065e-13	-1.10214	0.015	0.686	5.31399e-09
ABCG1	non-TF	2.78542e-17	-1.10221	0	0.8	5.66972e-13		TRUE
RAPGEFL1	non-TF	5.80875e-16	-1.1023	0.015	0.8	1.18237e-11
PLAG1	TF	4.89676e-10	-1.10245	0.029	0.571	9.96735e-06
PJA1	non-TF	9.9251e-08	-1.10252	0	0.371	0.00202025
NVL	non-TF	3.12304e-21	-1.10285	0.015	1	6.35694e-17
MNT	TF	1.36751e-10	-1.10297	0.044	0.657	2.78358e-06
ATP5F1B	non-TF	8.69071e-07	-1.10654	0.412	1	0.0176899
CCDC88C	non-TF	1.21514e-14	-1.10671	0.015	0.743	2.47341e-10
PSMD6	non-TF	4.46249e-11	-1.10711	0.103	0.829	9.08339e-07		TRUE
DYNLT3	non-TF	2.94908e-15	-1.10725	0.044	0.857	6.00286e-11
LDB3	non-TF	8.3926e-14	-1.10752	0	0.657	1.70831e-09
USP31	non-TF	1.57053e-19	-1.10759	0	0.886	3.19681e-15
GMEB1	TF	9.85137e-23	-1.10925	0	1	2.00525e-18
KIF1B	non-TF	9.16954e-12	-1.1093	0.132	0.914	1.86646e-07
EIF4E	non-TF	4.38028e-12	-1.11072	0.103	0.886	8.91606e-08		TRUE
KDM2A	non-TF	5.41157e-15	-1.11092	0.059	0.886	1.10153e-10		TRUE
NAV1	non-TF	1.28192e-18	-1.11206	0.044	1	2.60935e-14
ATP9A	non-TF	5.56644e-10	-1.11216	0.044	0.629	1.13305e-05
BRD1	non-TF	1.79357e-14	-1.11266	0	0.686	3.65081e-10		TRUE
ARGLU1	non-TF	3.59857e-09	-1.11347	0.338	1	7.3249e-05
BAP1	non-TF	1.2573e-09	-1.11399	0.015	0.514	2.55924e-05		TRUE
DCAF8	non-TF	7.50065e-11	-1.11497	0.088	0.771	1.52676e-06
CDK7	non-TF	3.07154e-16	-1.11509	0.074	1	6.25211e-12		TRUE
MTSS1	non-TF	5.069e-11	-1.11581	0.132	0.886	1.0318e-06
ROGDI	non-TF	1.97252e-10	-1.11699	0.147	0.914	4.01506e-06
BAZ1B	non-TF	2.27949e-06	-1.11701	0.118	0.6	0.046399
INSIG1	non-TF	1.03805e-16	-1.11757	0.059	0.971	2.11294e-12
CUL3	non-TF	7.48036e-13	-1.11765	0.059	0.8	1.52263e-08
LDHA	non-TF	2.88169e-08	-1.11767	0.103	0.657	0.000586568		TRUE
ATXN7	non-TF	1.79357e-14	-1.11776	0	0.686	3.65081e-10
RALGDS	non-TF	3.51538e-17	-1.11843	0.044	0.943	7.15555e-13
FEM1B	non-TF	1.9228e-12	-1.11967	0.029	0.686	3.91386e-08
JMJD1C	non-TF	1.14288e-13	-1.1216	0.088	0.914	2.32634e-09
BTAF1	non-TF	3.50819e-19	-1.12195	0.029	0.971	7.14092e-15
CEP290	non-TF	1.4304e-13	-1.12235	0.103	0.943	2.91157e-09
CDS1	non-TF	9.37717e-11	-1.12261	0.088	0.771	1.90872e-06		TRUE
CMIP	non-TF	1.12082e-11	-1.12267	0.029	0.657	2.28143e-07
PHRF1	non-TF	1.70257e-14	-1.12319	0.044	0.829	3.46559e-10
PIP5K1C	non-TF	7.98701e-09	-1.12341	0.044	0.571	0.000162576		TRUE
NPLOC4	non-TF	6.26884e-10	-1.12436	0.029	0.571	1.27602e-05
ARFGEF3	non-TF	6.5683e-14	-1.12511	0.015	0.714	1.33698e-09
SPAG9	non-TF	1.22909e-13	-1.12539	0.132	1	2.50182e-09
GPR108	non-TF	1.45641e-07	-1.12551	0.103	0.629	0.00296452
CAPZA2	non-TF	3.90911e-12	-1.12567	0.103	0.886	7.957e-08
DOCK3	non-TF	7.5086e-13	-1.12593	0.029	0.714	1.52838e-08
SEMA3A	non-TF	1.32803e-17	-1.12748	0.059	1	2.70321e-13
MYO9A	non-TF	3.81776e-13	-1.12754	0	0.629	7.77105e-09
TOX4	TF	5.1666e-14	-1.12774	0.103	0.971	1.05166e-09
PIBF1	non-TF	7.09589e-12	-1.12798	0.044	0.714	1.44437e-07
VPS13B	non-TF	2.78542e-17	-1.12935	0	0.8	5.66972e-13
C2CD3	non-TF	2.25174e-11	-1.13027	0.015	0.6	4.58342e-07
SDE2	non-TF	9.85137e-23	-1.13169	0	1	2.00525e-18
MAPRE1	non-TF	4.28464e-14	-1.13252	0.103	0.943	8.72138e-10
AKAP9	non-TF	2.26833e-06	-1.13345	0.75	1	0.0461719
POLR1C	non-TF	4.25606e-14	-1.13353	0.074	0.886	8.66321e-10
BOD1L1	non-TF	6.52558e-09	-1.13358	0.206	0.943	0.000132828
MAK	non-TF	4.19444e-12	-1.13376	0.029	0.686	8.53777e-08
NFAT5	TF	1.08319e-12	-1.13605	0.015	0.657	2.20484e-08
USP15	non-TF	9.00726e-13	-1.13608	0.059	0.8	1.83343e-08
ASXL2	non-TF	3.22085e-13	-1.1361	0.074	0.857	6.55605e-09
KCNH8	non-TF	5.71406e-14	-1.13621	0.015	0.714	1.1631e-09		TRUE
FAAH	non-TF	5.20406e-11	-1.13637	0.029	0.629	1.05929e-06		TRUE
UBXN2A	non-TF	1.12953e-15	-1.13736	0.088	1	2.29916e-11
CLDN12	non-TF	8.08121e-11	-1.13752	0.015	0.571	1.64493e-06
USP3	non-TF	5.88652e-12	-1.13857	0.044	0.714	1.1982e-07
ODC1	non-TF	4.66059e-08	-1.13945	0.265	0.943	0.000948663		TRUE
TIPARP	non-TF	4.09279e-12	-1.14066	0.015	0.629	8.33088e-08
CELF2	non-TF	7.27649e-12	-1.14198	0	0.571	1.48113e-07
PRUNE2	non-TF	2.61727e-20	-1.14439	0	0.914	5.32745e-16
ENKUR	non-TF	1.22776e-12	-1.1456	0.147	1	2.49911e-08
OGT	non-TF	1.24809e-10	-1.14591	0	0.514	2.54049e-06
CHIC1	non-TF	9.85137e-23	-1.1463	0	1	2.00525e-18
RIOK3	non-TF	8.66509e-20	-1.14633	0.029	1	1.76378e-15
DENND4A	non-TF	2.49392e-14	-1.14662	0.059	0.857	5.07638e-10
ARL6IP1	non-TF	3.80929e-10	-1.14721	0.221	0.971	7.75382e-06
MIB1	non-TF	1.57053e-19	-1.14726	0	0.886	3.19681e-15
ATP13A1	non-TF	1.79357e-14	-1.14738	0	0.686	3.65081e-10
WDR1	non-TF	1.06466e-16	-1.14865	0.074	1	2.16711e-12
YPEL4	non-TF	9.11513e-19	-1.14901	0	0.857	1.85538e-14
MAST4	non-TF	3.46278e-13	-1.15026	0.044	0.771	7.04849e-09
ALKBH1	non-TF	2.78542e-17	-1.15035	0	0.8	5.66972e-13
SLC39A9	non-TF	2.40616e-11	-1.15053	0.015	0.6	4.89774e-07
CLIP4	non-TF	9.2421e-12	-1.15104	0.029	0.657	1.88123e-07
FKBP4	non-TF	2.28705e-15	-1.15218	0.088	0.971	4.6553e-11		TRUE
ZC2HC1A	non-TF	9.38723e-09	-1.15224	0.147	0.8	0.000191077
RELT	non-TF	1.5296e-10	-1.15273	0.132	0.886	3.1135e-06
ZBTB47	TF	2.73278e-08	-1.15295	0	0.4	0.000556258
NIPAL1	non-TF	9.85137e-23	-1.15302	0	1	2.00525e-18
YEATS2	non-TF	1.17944e-17	-1.15336	0.015	0.857	2.40074e-13
GPI	non-TF	3.70186e-08	-1.15343	0.294	1	0.000753514		TRUE
EMC1	non-TF	4.08717e-08	-1.15506	0.147	0.771	0.000831944
DCAF10	non-TF	1.14572e-15	-1.15562	0.074	0.971	2.33211e-11
SRP72	non-TF	4.75865e-09	-1.1561	0.25	0.971	9.68624e-05
FAM193A	non-TF	1.69212e-13	-1.15743	0.029	0.743	3.44431e-09
SESTD1	non-TF	2.79562e-13	-1.15743	0.088	0.886	5.69049e-09
ACSS3	non-TF	1.86527e-15	-1.15784	0.029	0.829	3.79676e-11		TRUE
DRC1	non-TF	1.18975e-08	-1.15823	0.324	1	0.000242173
SEMA6A	non-TF	1.57053e-19	-1.15873	0	0.886	3.19681e-15
ANAPC2	non-TF	2.33616e-15	-1.15909	0.015	0.771	4.75524e-11
KIAA1211L	non-TF	5.15303e-10	-1.16046	0.221	1	1.0489e-05
EPB41	non-TF	5.97552e-09	-1.16047	0.088	0.686	0.000121632		TRUE
ARHGAP44	non-TF	3.72392e-15	-1.16095	0	0.714	7.58004e-11
ARID2	TF	3.27802e-17	-1.1613	0.044	0.943	6.67241e-13
ANKFY1	non-TF	3.02455e-19	-1.16159	0.029	0.971	6.15647e-15
STXBP5	non-TF	2.79681e-13	-1.16201	0.015	0.686	5.6929e-09
FBXW9	non-TF	3.42399e-13	-1.16306	0.074	0.857	6.96953e-09
NCAM1	non-TF	6.55941e-22	-1.16318	0	0.971	1.33517e-17		TRUE
PI4K2A	non-TF	2.10704e-11	-1.16353	0.015	0.6	4.28888e-07		TRUE
CALR	non-TF	4.34589e-08	-1.16743	0.441	1	0.000884605		TRUE
GNAQ	non-TF	3.76377e-16	-1.16789	0.015	0.8	7.66116e-12		TRUE
ATG4B	non-TF	1.53133e-07	-1.16797	0.044	0.486	0.00311702		TRUE
MAPK6	non-TF	1.69134e-14	-1.16797	0.059	0.857	3.44272e-10		TRUE
ZNF3	TF	1.38961e-16	-1.16823	0.074	1	2.82855e-12
DLK2	non-TF	1.44781e-11	-1.16834	0.029	0.657	2.94701e-07
GYS1	non-TF	3.81776e-13	-1.16837	0	0.629	7.77105e-09
TGFB3	non-TF	5.32889e-14	-1.17275	0.015	0.714	1.0847e-09		TRUE
ATP10D	non-TF	2.1749e-15	-1.17331	0.015	0.771	4.42701e-11
ELOVL4	non-TF	4.40993e-11	-1.17453	0.176	0.971	8.97641e-07
PURA	TF	6.20611e-10	-1.17711	0.147	0.886	1.26325e-05		TRUE
TMC1	non-TF	8.4834e-09	-1.17728	0.221	0.943	0.00017268
ASB8	non-TF	7.20827e-10	-1.17746	0.103	0.743	1.46724e-05
MDM4	non-TF	1.5329e-06	-1.17896	0.103	0.571	0.0312022		TRUE
ATXN1	non-TF	5.64214e-10	-1.17917	0.132	0.829	1.14846e-05
NEMF	non-TF	6.20365e-14	-1.17966	0.088	0.914	1.26275e-09
CARF	TF	5.12016e-18	-1.18081	0	0.829	1.04221e-13
PARL	non-TF	1.99527e-11	-1.18117	0.088	0.8	4.06138e-07
BBS2	non-TF	2.665e-12	-1.18143	0.029	0.686	5.4246e-08
MXD1	TF	2.665e-12	-1.18218	0.029	0.686	5.4246e-08
FGF10	non-TF	1.46846e-16	-1.18242	0	0.771	2.98904e-12
ZMYM2	non-TF	1.22144e-14	-1.18299	0.059	0.857	2.48624e-10
ABHD14B	non-TF	2.08952e-11	-1.18304	0.103	0.857	4.25322e-07
MCRIP1	non-TF	5.76847e-13	-1.18449	0.029	0.714	1.17417e-08
KIT	non-TF	1.79357e-14	-1.18466	0	0.686	3.65081e-10		TRUE
COA5	non-TF	3.61593e-09	-1.18512	0.103	0.743	7.36023e-05
ST3GAL1	non-TF	5.12016e-18	-1.18656	0	0.829	1.04221e-13
PRKAB1	non-TF	2.78542e-17	-1.18686	0	0.8	5.66972e-13		TRUE
CD24	non-TF	1.96923e-13	-1.18756	0.059	0.829	4.00838e-09
SLITRK6	non-TF	9.9251e-08	-1.18952	0	0.371	0.00202025		TRUE
TBC1D7	non-TF	3.72392e-15	-1.18953	0	0.714	7.58004e-11
SNAP91	non-TF	3.20308e-11	-1.19038	0.103	0.829	6.51986e-07
PCYT1A	non-TF	7.08902e-10	-1.19041	0.029	0.571	1.44297e-05		TRUE
KDM3B	non-TF	6.42422e-10	-1.19108	0.059	0.657	1.30765e-05
CCDC189	non-TF	4.1269e-15	-1.19162	0.044	0.857	8.4003e-11
ZNF317	TF	3.3579e-18	-1.19312	0.015	0.886	6.83501e-14
C18orf32	non-TF	3.41541e-15	-1.19378	0.059	0.886	6.95208e-11
WNT5A	non-TF	6.29368e-17	-1.19401	0.015	0.829	1.28108e-12
RNASEK	non-TF	1.46726e-17	-1.19414	0.029	0.914	2.9866e-13
NOL4L	non-TF	7.9235e-09	-1.19462	0.074	0.629	0.000161283
TCTN2	non-TF	1.51947e-12	-1.19528	0.074	0.829	3.09289e-08
WDFY1	non-TF	3.26248e-20	-1.19636	0.029	1	6.64078e-16
ADGRV1	non-TF	3.43403e-11	-1.19663	0.147	0.943	6.98996e-07		TRUE
ACP2	non-TF	6.55941e-22	-1.1972	0	0.971	1.33517e-17
CCT5	non-TF	2.24778e-08	-1.19812	0.324	1	0.000457536
SEC24C	non-TF	1.21514e-14	-1.1982	0.015	0.743	2.47341e-10
GABARAPL1	non-TF	4.17007e-15	-1.19976	0.103	1	8.48817e-11
DLD	non-TF	7.11987e-18	-1.20063	0.029	0.914	1.44925e-13
CNNM4	non-TF	2.31125e-18	-1.20105	0.029	0.943	4.70455e-14
CREBRF	TF	3.76435e-16	-1.20122	0.074	0.971	7.66234e-12
PLXNB2	non-TF	4.66124e-11	-1.20163	0.074	0.743	9.48795e-07
CRELD2	non-TF	8.45192e-13	-1.20211	0.118	0.943	1.72039e-08
KDM5B	non-TF	1.09964e-17	-1.20334	0.029	0.914	2.23831e-13		TRUE
APBB3	non-TF	6.62242e-11	-1.20338	0.044	0.657	1.34799e-06
GDI1	non-TF	6.25722e-11	-1.20363	0.191	1	1.27366e-06
PDP2	non-TF	1.14658e-15	-1.20399	0.029	0.829	2.33386e-11
SPATA2	non-TF	5.08978e-09	-1.20409	0.015	0.486	0.000103602
BCL2L1	non-TF	2.72458e-12	-1.20448	0.015	0.629	5.54588e-08		TRUE
TET3	non-TF	2.28272e-16	-1.20742	0.029	0.857	4.64647e-12
EHD4	non-TF	7.90453e-13	-1.20767	0.044	0.743	1.60897e-08
RECQL5	non-TF	7.50711e-16	-1.20953	0	0.743	1.52807e-11
PIK3R1	non-TF	2.78542e-17	-1.21	0	0.8	5.66972e-13		TRUE
UBQLN4	non-TF	2.00791e-08	-1.21058	0.015	0.457	0.000408709
OXCT1	non-TF	5.12753e-10	-1.21085	0.103	0.771	1.04371e-05
ARL5A	non-TF	7.10431e-07	-1.21226	0.118	0.629	0.0144608
CEBPG	TF	4.21584e-21	-1.21482	0	0.943	8.58135e-17
DECR2	non-TF	1.77874e-20	-1.21591	0.029	1	3.62063e-16
CLIC5	non-TF	1.70728e-18	-1.21931	0.044	1	3.47516e-14
SLC25A25	non-TF	3.26683e-10	-1.21946	0.044	0.629	6.64963e-06
KIAA0100	non-TF	2.78542e-17	-1.22009	0	0.8	5.66972e-13
PARP2	non-TF	1.21283e-10	-1.22025	0.044	0.657	2.46872e-06		TRUE
ANKMY2	non-TF	1.24809e-10	-1.22119	0	0.514	2.54049e-06
TEKT1	non-TF	8.49725e-08	-1.22165	0.338	1	0.00172962
DDX46	non-TF	1.19131e-12	-1.22333	0.118	0.943	2.4249e-08
SMG7	non-TF	1.19959e-13	-1.2252	0.074	0.857	2.44177e-09
RBSN	non-TF	2.61727e-20	-1.22732	0	0.914	5.32745e-16
DPH6	non-TF	5.34299e-07	-1.22794	0.029	0.429	0.0108757
IDH3A	non-TF	8.05799e-12	-1.22819	0.103	0.857	1.6402e-07
GOLGA7	non-TF	5.06013e-08	-1.22895	0.132	0.714	0.00102999
TUBA1A	non-TF	1.11823e-08	-1.22901	0.809	1	0.000227615		TRUE
NTRK2	non-TF	9.85137e-23	-1.22948	0	1	2.00525e-18		TRUE
RHPN1	non-TF	7.15776e-10	-1.23456	0.118	0.8	1.45696e-05
ZSCAN26	TF	3.02455e-19	-1.23536	0.029	0.971	6.15647e-15
LRRC56	non-TF	1.08319e-12	-1.23613	0.015	0.657	2.20484e-08
BCKDK	non-TF	1.32616e-20	-1.23661	0.015	0.971	2.6994e-16
ZRANB1	non-TF	4.28008e-17	-1.23812	0.059	0.971	8.7121e-13
C14orf132	non-TF	1.27439e-19	-1.23989	0.015	0.943	2.59401e-15
POFUT2	non-TF	2.78542e-17	-1.23992	0	0.8	5.66972e-13
THG1L	non-TF	1.80355e-21	-1.24168	0.015	1	3.67113e-17
PPP2R1A	non-TF	5.23089e-11	-1.2425	0.074	0.743	1.06475e-06
DNAH2	non-TF	6.41763e-15	-1.24283	0.015	0.743	1.30631e-10
FYCO1	non-TF	2.88801e-21	-1.24576	0.015	1	5.87855e-17
ECD	non-TF	5.37825e-18	-1.24703	0.059	1	1.09474e-13
NACC2	non-TF	1.22705e-20	-1.24808	0.015	0.971	2.49765e-16
PI4KA	non-TF	1.09964e-17	-1.24984	0.029	0.914	2.23831e-13		TRUE
RAD21	non-TF	8.89865e-11	-1.25133	0.103	0.8	1.81132e-06		TRUE
BBS7	non-TF	8.3926e-14	-1.25151	0	0.657	1.70831e-09
CLK3	non-TF	2.50917e-15	-1.25447	0.015	0.771	5.10742e-11		TRUE
AK8	non-TF	3.81776e-13	-1.25482	0	0.629	7.77105e-09
EXOC7	non-TF	1.84049e-17	-1.25648	0.015	0.857	3.74632e-13
MDM2	non-TF	5.4045e-16	-1.25653	0.015	0.8	1.10009e-11		TRUE
ERCC6	non-TF	1.4894e-18	-1.25656	0.029	0.943	3.03167e-14		TRUE
SLC7A4	non-TF	1.2163e-16	-1.25663	0.015	0.829	2.47578e-12
MORF4L2	non-TF	5.06145e-09	-1.25702	0.044	0.571	0.000103026
SOD2	non-TF	1.43492e-19	-1.25732	0.029	0.971	2.92078e-15		TRUE
CERS5	non-TF	5.92849e-10	-1.25805	0.191	0.943	1.20674e-05
TMEM231	non-TF	4.79829e-13	-1.25852	0.088	0.886	9.76692e-09
BRIP1	non-TF	3.79424e-20	-1.25978	0.029	1	7.72317e-16
LMAN2L	non-TF	1.38491e-13	-1.2654	0.029	0.743	2.81899e-09
ATG2B	non-TF	2.78542e-17	-1.26786	0	0.8	5.66972e-13
C5orf24	non-TF	1.70944e-09	-1.26855	0.206	0.971	3.47956e-05
BBS4	non-TF	2.72377e-08	-1.27004	0.088	0.629	0.000554424
PARP6	non-TF	3.26683e-10	-1.2704	0.044	0.629	6.64963e-06
SDC3	non-TF	1.68938e-12	-1.27044	0	0.6	3.43872e-08
PSMA6	non-TF	1.03681e-09	-1.27141	0.015	0.514	2.11042e-05		TRUE
CA7	non-TF	7.84348e-09	-1.27155	0.059	0.6	0.000159654		TRUE
COPB2	non-TF	9.90218e-14	-1.27203	0.029	0.743	2.01559e-09
UBE2QL1	non-TF	3.55885e-11	-1.27282	0.029	0.629	7.24404e-07
PAN3	non-TF	1.54873e-20	-1.27289	0.015	0.971	3.15245e-16
FAM210A	non-TF	1.93653e-09	-1.27386	0	0.457	3.9418e-05
OSCP1	non-TF	4.46621e-08	-1.27547	0.294	0.943	0.000909096
SMYD3	non-TF	9.11513e-19	-1.27744	0	0.857	1.85538e-14
BLZF1	TF	2.67817e-09	-1.27761	0.044	0.571	5.45141e-05
UBR5	non-TF	1.39912e-14	-1.27764	0.015	0.743	2.84791e-10
SLC25A12	non-TF	1.51481e-15	-1.27797	0.029	0.829	3.08339e-11
NOL9	non-TF	4.72437e-19	-1.27825	0.015	0.914	9.61645e-15
CBX3	non-TF	9.20238e-09	-1.27901	0.368	1	0.000187315
LATS1	non-TF	1.98168e-17	-1.2795	0.015	0.857	4.03371e-13
DUSP10	non-TF	9.11513e-19	-1.28143	0	0.857	1.85538e-14
NEK7	non-TF	9.11513e-19	-1.28153	0	0.857	1.85538e-14		TRUE
SRP68	non-TF	8.06478e-10	-1.28651	0.059	0.657	1.64159e-05
GTPBP1	non-TF	4.73139e-17	-1.28986	0.029	0.886	9.63073e-13
TUT1	non-TF	7.56663e-11	-1.28996	0.015	0.571	1.54019e-06
TIRAP	non-TF	1.46846e-16	-1.29127	0	0.771	2.98904e-12		TRUE
PSMD2	non-TF	5.67568e-12	-1.29134	0.132	0.943	1.15529e-07		TRUE
DOT1L	non-TF	9.82926e-15	-1.29218	0.015	0.743	2.00075e-10		TRUE
CFAP69	non-TF	7.58556e-18	-1.29235	0.044	0.971	1.54404e-13
P4HB	non-TF	8.41753e-12	-1.295	0.088	0.8	1.71339e-07		TRUE
ALDH1A3	non-TF	8.03525e-10	-1.29744	0.206	0.971	1.63558e-05
HUWE1	non-TF	1.46357e-13	-1.29787	0.132	1	2.97909e-09
SLC1A4	non-TF	5.98289e-15	-1.29855	0.029	0.8	1.21782e-10
TLN2	non-TF	2.16964e-16	-1.30224	0.059	0.943	4.4163e-12
LGALS8	non-TF	4.67737e-16	-1.30293	0.015	0.8	9.52079e-12		TRUE
YARS	non-TF	1.58723e-17	-1.30482	0.015	0.857	3.23081e-13
PPP1CB	non-TF	2.93536e-08	-1.30515	0.426	1	0.000597492
CACNA1D	non-TF	1.27162e-11	-1.30558	0.059	0.743	2.58839e-07		TRUE
ICA1	non-TF	1.9256e-14	-1.30694	0.059	0.857	3.91957e-10		TRUE
EIF3C	non-TF	9.85137e-23	-1.30759	0	1	2.00525e-18
ARL6	non-TF	2.1408e-18	-1.30806	0.015	0.886	4.3576e-14
ASH1L	non-TF	7.46545e-12	-1.30939	0.132	0.943	1.51959e-07
LMBRD1	non-TF	8.95495e-10	-1.30968	0.074	0.686	1.82278e-05
RAB18	non-TF	1.68368e-11	-1.31021	0.147	0.914	3.42713e-07
MUL1	non-TF	9.15693e-15	-1.31035	0.015	0.743	1.86389e-10
KDM7A	non-TF	3.37696e-21	-1.31072	0.015	1	6.8738e-17		TRUE
KMT2C	TF	1.4586e-15	-1.31074	0.088	1	2.96898e-11		TRUE
POU3F2	TF	7.45527e-20	-1.31084	0.015	0.943	1.51752e-15
GAS7	non-TF	1.57053e-19	-1.31231	0	0.886	3.19681e-15
BRD8	non-TF	1.17416e-09	-1.31322	0.206	0.971	2.39001e-05
ZNF483	TF	1.16237e-06	-1.31422	0.059	0.486	0.0236601
GCLC	non-TF	1.40255e-12	-1.31618	0.044	0.743	2.85489e-08		TRUE
KLF6	TF	2.9379e-12	-1.31933	0.103	0.886	5.98009e-08
SMG1	non-TF	5.12016e-18	-1.32161	0	0.829	1.04221e-13		TRUE
BET1L	non-TF	7.56663e-11	-1.32254	0.015	0.571	1.54019e-06
MYCBPAP	non-TF	3.89928e-18	-1.32294	0.015	0.886	7.93699e-14
PCNX4	non-TF	4.58342e-12	-1.32372	0.044	0.714	9.32955e-08
CRY2	non-TF	9.08222e-17	-1.3265	0.015	0.829	1.84869e-12
FOXP1	TF	8.53494e-09	-1.32796	0.147	0.8	0.000173729
RASD2	non-TF	5.12016e-18	-1.32851	0	0.829	1.04221e-13
TOLLIP	non-TF	3.69251e-13	-1.32868	0.044	0.771	7.51611e-09		TRUE
SLC38A1	non-TF	8.52056e-09	-1.32885	0.206	0.886	0.000173436		TRUE
SYNE4	non-TF	1.61834e-10	-1.32904	0.206	0.971	3.29414e-06
GPR156	non-TF	5.98322e-13	-1.33357	0.118	0.943	1.21788e-08
ZNF207	TF	2.55026e-09	-1.33437	0.074	0.657	5.19105e-05
CNOT10	non-TF	7.10827e-15	-1.33449	0.088	0.943	1.44689e-10
QRICH1	non-TF	5.12016e-18	-1.33478	0	0.829	1.04221e-13
CALM2	non-TF	2.45341e-13	-1.33581	1	1	4.99392e-09	TRUE
NCOA2	non-TF	4.92164e-16	-1.33666	0.044	0.886	1.0018e-11		TRUE
CASZ1	TF	6.59551e-13	-1.33848	0.103	0.914	1.34252e-08
TTC26	non-TF	4.21584e-21	-1.33911	0	0.943	8.58135e-17
KIF13A	non-TF	9.85664e-12	-1.33991	0.029	0.657	2.00632e-07
DNAJA1	non-TF	2.22818e-07	-1.34375	0.574	1	0.00453545
PKD1	non-TF	4.5865e-11	-1.34384	0.029	0.629	9.33583e-07
ADSL	non-TF	2.88801e-21	-1.34431	0.015	1	5.87855e-17
ACTR8	non-TF	4.09279e-12	-1.34501	0.015	0.629	8.33088e-08
RDH13	non-TF	2.78542e-17	-1.34525	0	0.8	5.66972e-13
STK11IP	non-TF	1.60284e-18	-1.34584	0.029	0.943	3.26258e-14
TUBA1B	non-TF	3.592e-14	-1.346	0.118	1	7.31151e-10		TRUE
CDS2	non-TF	2.6568e-17	-1.34716	0.044	0.943	5.40792e-13
UBE4B	non-TF	5.12016e-18	-1.34943	0	0.829	1.04221e-13
LIPH	non-TF	1.68938e-12	-1.34969	0	0.6	3.43872e-08
ELOVL6	non-TF	1.45658e-12	-1.34973	0.088	0.857	2.96486e-08
ZFR	non-TF	1.02661e-08	-1.35	0.221	0.886	0.000208967
RUFY1	non-TF	2.78542e-17	-1.35086	0	0.8	5.66972e-13
RCBTB2	non-TF	1.57053e-19	-1.35097	0	0.886	3.19681e-15
LARP4B	non-TF	6.11414e-13	-1.35602	0.044	0.743	1.24453e-08
ATE1	non-TF	5.58495e-15	-1.35761	0.029	0.8	1.13682e-10
RAB3GAP1	non-TF	1.4894e-18	-1.36035	0.029	0.943	3.03167e-14
BRD2	non-TF	1.34983e-16	-1.36066	0.059	0.943	2.74759e-12		TRUE
WDR90	non-TF	9.25745e-14	-1.364	0.029	0.743	1.88435e-09
WDR26	non-TF	1.95358e-20	-1.36443	0.015	0.971	3.9765e-16
IGF1R	non-TF	3.42824e-12	-1.36466	0.088	0.829	6.97818e-08		TRUE
EFNA5	non-TF	2.68202e-18	-1.36637	0.015	0.886	5.45924e-14
COPA	non-TF	6.29506e-17	-1.36686	0.029	0.886	1.28136e-12
MORN1	non-TF	1.80818e-20	-1.36696	0.015	0.971	3.68055e-16
POLR2A	non-TF	1.47717e-16	-1.36743	0.044	0.914	3.00678e-12		TRUE
NUP35	non-TF	1.30034e-15	-1.36941	0.059	0.914	2.64684e-11
USP9X	non-TF	8.34049e-14	-1.3697	0.103	0.943	1.69771e-09
MAP9	non-TF	3.19296e-10	-1.36989	0.206	0.943	6.49927e-06
JMY	non-TF	9.41243e-12	-1.37	0.059	0.743	1.9159e-07
CHAC1	non-TF	4.5379e-12	-1.3706	0.059	0.743	9.2369e-08
ULK2	non-TF	3.3579e-18	-1.37113	0.015	0.886	6.83501e-14
TMTC4	non-TF	4.76121e-11	-1.37114	0.015	0.571	9.69145e-07
CYP20A1	non-TF	5.93534e-16	-1.37153	0.088	1	1.20814e-11		TRUE
CCNL2	non-TF	2.89086e-18	-1.3726	0.015	0.886	5.88436e-14
DVL3	non-TF	7.94737e-11	-1.37321	0.044	0.657	1.61769e-06
PRPF8	non-TF	3.90339e-08	-1.37331	0.25	0.943	0.000794534
DNAH10	non-TF	2.1749e-15	-1.37341	0.015	0.771	4.42701e-11
SMIM7	non-TF	8.71949e-11	-1.37408	0.176	0.943	1.77485e-06
CCAR1	non-TF	2.41999e-19	-1.37617	0.029	0.971	4.92588e-15
ARFGEF1	non-TF	9.59877e-17	-1.37638	0.059	0.943	1.95383e-12
CDK5RAP2	non-TF	5.65895e-13	-1.3764	0.162	1	1.15188e-08
SH3GL2	non-TF	1.52747e-20	-1.37665	0.029	1	3.10916e-16
TRIM33	non-TF	1.29613e-12	-1.37668	0.029	0.686	2.63826e-08
BAZ2A	TF	2.76845e-12	-1.3771	0.044	0.714	5.63518e-08		TRUE
WDR6	non-TF	3.42824e-12	-1.37889	0.088	0.829	6.97818e-08
ACO2	non-TF	3.90011e-15	-1.37939	0.044	0.829	7.93868e-11
MORN4	non-TF	7.72359e-08	-1.37974	0.015	0.429	0.00157214
HDAC3	non-TF	3.45352e-13	-1.37999	0.103	0.914	7.02963e-09		TRUE
CLCN4	non-TF	1.18799e-13	-1.38158	0.059	0.829	2.41816e-09		TRUE
MOB3B	non-TF	1.30933e-12	-1.38306	0.103	0.886	2.66514e-08		TRUE
STT3A	non-TF	1.57053e-19	-1.38328	0	0.886	3.19681e-15
ENAH	non-TF	2.28775e-09	-1.38455	0.25	1	4.65671e-05
PLEKHB1	non-TF	2.15363e-07	-1.38488	0.324	0.971	0.00438372
B4GALNT3	non-TF	1.79357e-14	-1.38586	0	0.686	3.65081e-10
KMT2E	non-TF	7.01925e-10	-1.38627	0.279	1	1.42877e-05		TRUE
CHD2	non-TF	2.96933e-13	-1.38697	0.088	0.886	6.04407e-09
DNAJB13	non-TF	5.069e-11	-1.38757	0.132	0.886	1.0318e-06
KLHL24	non-TF	3.72777e-18	-1.38851	0.044	0.971	7.58787e-14
TOM1	non-TF	1.13268e-13	-1.38961	0.029	0.743	2.30558e-09
LARP1	non-TF	1.77103e-16	-1.39024	0.059	0.943	3.60492e-12
ARF1	non-TF	6.45032e-14	-1.39329	0.132	1	1.31296e-09
ATP2A2	non-TF	8.54627e-15	-1.39335	0.059	0.886	1.73959e-10		TRUE
ABHD4	non-TF	7.27649e-12	-1.39525	0	0.571	1.48113e-07
RAVER2	non-TF	4.35086e-16	-1.3955	0.015	0.8	8.85618e-12
IARS	non-TF	2.32123e-16	-1.39573	0.059	0.943	4.72487e-12
DMXL2	non-TF	7.35176e-15	-1.39576	0.029	0.8	1.49645e-10
TMEM69	non-TF	1.42398e-21	-1.39694	0.015	1	2.89852e-17
TP53	TF	3.0526e-11	-1.39778	0	0.543	6.21356e-07		TRUE
CPSF3	non-TF	4.97663e-10	-1.39811	0	0.486	1.01299e-05
SALL2	TF	1.30571e-14	-1.40261	0.044	0.829	2.65778e-10
SRSF3	non-TF	6.41528e-11	-1.40484	0.176	0.943	1.30583e-06
RRP12	non-TF	1.46846e-16	-1.4058	0	0.771	2.98904e-12
CMTM4	non-TF	1.30571e-14	-1.4068	0.044	0.829	2.65778e-10
GDPD1	non-TF	2.57692e-15	-1.40793	0.044	0.857	5.24531e-11
STIP1	non-TF	8.25112e-12	-1.40955	0.162	0.943	1.67952e-07
SMPDL3A	non-TF	3.25805e-16	-1.40998	0.044	0.886	6.63176e-12
WIPF2	non-TF	2.6705e-21	-1.41152	0.015	1	5.4358e-17
PHLPP1	non-TF	2.7645e-11	-1.41157	0.074	0.743	5.62714e-07
RRP7A	non-TF	1.84442e-11	-1.41178	0.015	0.6	3.75432e-07		TRUE
GTF3C2	non-TF	4.06808e-19	-1.41217	0.029	0.971	8.28059e-15
MAST3	non-TF	5.73097e-10	-1.41475	0.059	0.657	1.16654e-05		TRUE
SREBF2	TF	3.47088e-18	-1.41554	0.044	0.971	7.06498e-14
WDR35	non-TF	1.67349e-20	-1.42129	0.015	0.971	3.4064e-16
TCTN3	non-TF	4.80711e-10	-1.4217	0.088	0.714	9.78488e-06
RAB6A	non-TF	1.43492e-19	-1.42211	0.029	0.971	2.92078e-15
PTPRF	non-TF	1.79357e-14	-1.42341	0	0.686	3.65081e-10		TRUE
COPG1	non-TF	1.57053e-19	-1.424	0	0.886	3.19681e-15
CSTF2T	non-TF	4.23772e-15	-1.4255	0.029	0.8	8.62588e-11
OSTF1	non-TF	2.83326e-17	-1.42565	0.059	0.971	5.76709e-13
UBXN11	non-TF	1.21298e-10	-1.42665	0.191	0.914	2.46902e-06
CEP19	non-TF	3.02686e-16	-1.42771	0.029	0.857	6.16118e-12
PSME4	non-TF	1.06927e-15	-1.42926	0.029	0.829	2.17649e-11		TRUE
PTTG1IP	non-TF	3.03843e-12	-1.42969	0.118	0.886	6.18473e-08
PLAT	non-TF	3.02686e-16	-1.42974	0.029	0.857	6.16118e-12		TRUE
SC5D	non-TF	2.8012e-15	-1.42976	0.059	0.886	5.70184e-11
SCAF8	non-TF	3.11576e-18	-1.43053	0.015	0.886	6.34212e-14
RNF4	non-TF	8.4411e-17	-1.43084	0.015	0.829	1.71819e-12
PDHB	non-TF	3.98688e-09	-1.43325	0.25	0.943	8.11529e-05		TRUE
WNK2	non-TF	1.88464e-15	-1.43488	0.074	0.914	3.83618e-11		TRUE
PLEKHM3	non-TF	5.43205e-17	-1.43558	0.015	0.829	1.10569e-12
PRKN	non-TF	5.95902e-20	-1.43664	0.029	1	1.21296e-15
EML5	non-TF	3.72392e-15	-1.4393	0	0.714	7.58004e-11
IFT74	non-TF	2.07253e-07	-1.44093	0.324	0.914	0.00421864
LBR	non-TF	5.27139e-11	-1.44263	0.147	0.886	1.07299e-06
BIRC6	non-TF	4.4383e-15	-1.44292	0.103	1	9.03416e-11
RBM26	non-TF	4.85366e-14	-1.44317	0.059	0.829	9.87962e-10
ST14	non-TF	7.50711e-16	-1.44462	0	0.743	1.52807e-11		TRUE
KIAA1191	non-TF	2.4511e-09	-1.44542	0.103	0.714	4.98922e-05
ATF6	TF	1.30571e-14	-1.44602	0.044	0.829	2.65778e-10
CCDC181	non-TF	1.10425e-14	-1.44859	0.088	0.943	2.2477e-10
SBNO1	non-TF	3.5803e-12	-1.44896	0.132	0.914	7.28771e-08
ANKHD1	non-TF	5.12016e-18	-1.44923	0	0.829	1.04221e-13
BNIP3	non-TF	7.19122e-14	-1.4506	0.118	0.943	1.46377e-09
PLPPR5	non-TF	1.70924e-17	-1.45174	0.015	0.857	3.47916e-13
HMGB1	TF	2.48003e-08	-1.45362	0.735	1	0.000504811		TRUE
FAM219B	non-TF	4.00341e-18	-1.45416	0.044	0.971	8.14893e-14
BTBD9	non-TF	1.29524e-13	-1.45729	0.029	0.743	2.63647e-09
PGRMC1	non-TF	8.74522e-14	-1.46161	0.118	0.971	1.78009e-09		TRUE
RPGRIP1L	non-TF	4.86146e-12	-1.46213	0.074	0.8	9.89549e-08
TSN	non-TF	5.12842e-12	-1.46305	0.059	0.743	1.04389e-07
INPP1	non-TF	4.02765e-14	-1.465	0.015	0.714	8.19828e-10		TRUE
RCN1	non-TF	2.88801e-21	-1.46518	0.015	1	5.87855e-17
RIMKLB	non-TF	4.74636e-15	-1.4658	0.059	0.886	9.66121e-11
PIAS1	TF	5.23539e-13	-1.46679	0.118	0.914	1.06566e-08
SYNJ1	non-TF	4.37896e-19	-1.46865	0.015	0.914	8.91337e-15
AKAP8L	non-TF	2.18467e-14	-1.46978	0.103	0.943	4.44689e-10
GABBR1	non-TF	2.78542e-17	-1.47034	0	0.8	5.66972e-13		TRUE
MCU	non-TF	2.89086e-18	-1.47131	0.015	0.886	5.88436e-14
KIF3A	non-TF	4.54068e-11	-1.47154	0.221	0.971	9.24256e-07
ELFN1	non-TF	3.72392e-15	-1.4724	0	0.714	7.58004e-11
PMVK	non-TF	5.38719e-14	-1.47275	0.029	0.743	1.09656e-09		TRUE
AKAP6	non-TF	4.56058e-12	-1.47303	0.103	0.857	9.28305e-08
SLK	non-TF	1.30553e-07	-1.47382	0.353	0.943	0.00265741		TRUE
RC3H1	non-TF	2.77547e-13	-1.47384	0.029	0.714	5.64946e-09
TIMP3	non-TF	6.55941e-22	-1.47385	0	0.971	1.33517e-17
SGMS1	non-TF	1.93653e-09	-1.47407	0	0.457	3.9418e-05		TRUE
IFT172	non-TF	6.15614e-18	-1.47456	0.029	0.914	1.25308e-13
WAPL	non-TF	2.48326e-16	-1.47459	0.059	0.943	5.05467e-12
PLXNA2	non-TF	1.05501e-14	-1.47629	0.015	0.743	2.14748e-10
GPR155	non-TF	9.51574e-18	-1.47714	0.029	0.914	1.93693e-13
ARHGEF12	non-TF	5.12016e-18	-1.47976	0	0.829	1.04221e-13
CCT8	non-TF	3.98688e-09	-1.47985	0.25	0.943	8.11529e-05
ENO4	non-TF	6.3925e-20	-1.48019	0.015	0.943	1.30119e-15
ARAF	non-TF	2.1749e-15	-1.4833	0.015	0.771	4.42701e-11		TRUE
PSMA3	non-TF	1.08737e-10	-1.48399	0.206	0.971	2.21334e-06		TRUE
TIMP2	non-TF	4.13565e-07	-1.48843	0.118	0.629	0.00841811
USP42	non-TF	1.97146e-11	-1.49126	0.015	0.6	4.0129e-07
CTSA	non-TF	2.25836e-18	-1.49158	0.044	0.971	4.59689e-14		TRUE
ARHGAP32	non-TF	8.57293e-10	-1.49237	0.118	0.771	1.74502e-05
TXLNA	non-TF	1.39543e-14	-1.49349	0.044	0.829	2.8404e-10
PTPRM	non-TF	2.57692e-15	-1.49361	0.044	0.857	5.24531e-11		TRUE
RSRP1	non-TF	7.46137e-20	-1.49541	0.029	1	1.51876e-15
TANGO6	non-TF	3.61861e-18	-1.49559	0.015	0.886	7.36568e-14
UHRF1BP1	non-TF	1.02068e-12	-1.49587	0.044	0.743	2.0776e-08
MACF1	non-TF	2.45579e-09	-1.49687	0.235	0.943	4.99876e-05
TP53INP2	non-TF	2.61727e-20	-1.49744	0	0.914	5.32745e-16
DDB1	non-TF	2.14145e-12	-1.49824	0.088	0.829	4.35893e-08		TRUE
LRRN1	non-TF	2.61727e-20	-1.50011	0	0.914	5.32745e-16
EPM2AIP1	non-TF	3.8062e-10	-1.5016	0.162	0.886	7.74751e-06
NSG2	non-TF	1.24809e-10	-1.50281	0	0.514	2.54049e-06
SF3B2	non-TF	1.04795e-11	-1.50307	0.206	1	2.13309e-07		TRUE
GPATCH8	non-TF	4.61643e-18	-1.50321	0.044	0.971	9.39675e-14
CPEB4	non-TF	2.08797e-09	-1.50603	0.132	0.771	4.25007e-05
AP2M1	non-TF	3.6372e-11	-1.50969	0.265	1	7.40352e-07
TMX2	non-TF	1.52792e-07	-1.51048	0.074	0.543	0.00311008		TRUE
FAM3C	non-TF	9.28249e-17	-1.51193	0.074	0.971	1.88945e-12
HSP90B1	non-TF	1.70064e-08	-1.51555	0.662	1	0.000346165		TRUE
NMT2	non-TF	1.61612e-11	-1.51619	0.059	0.714	3.28961e-07
PTPRU	non-TF	1.46846e-16	-1.51725	0	0.771	2.98904e-12
GABARAP	non-TF	4.35906e-18	-1.52157	0.059	1	8.87286e-14
USP38	non-TF	4.68399e-12	-1.52326	0.015	0.629	9.53426e-08
CLN6	non-TF	5.84336e-13	-1.5266	0.015	0.657	1.18942e-08
AK1	non-TF	2.48768e-10	-1.52751	0.015	0.543	5.06367e-06
LY75	non-TF	1.46846e-16	-1.52786	0	0.771	2.98904e-12
EPHX1	non-TF	8.79092e-12	-1.52905	0.103	0.829	1.78939e-07		TRUE
ZNF445	TF	1.38491e-13	-1.53089	0.029	0.743	2.81899e-09
AGPAT4	non-TF	2.61727e-20	-1.53163	0	0.914	5.32745e-16
IFT80	non-TF	8.4411e-17	-1.53458	0.015	0.829	1.71819e-12
DUSP18	non-TF	1.32168e-16	-1.5369	0.044	0.886	2.69029e-12
NR6A1	TF	1.31539e-15	-1.5373	0.015	0.771	2.67747e-11		TRUE
POR	non-TF	1.461e-15	-1.538	0.088	0.971	2.97388e-11		TRUE
EPS8L2	non-TF	5.29465e-08	-1.53896	0.368	1	0.00107773
PBX1	TF	2.02268e-11	-1.53912	0.147	0.943	4.11716e-07
TGS1	non-TF	2.2729e-13	-1.54047	0.059	0.8	4.62649e-09
DST	non-TF	9.18654e-09	-1.54083	0.294	0.943	0.000186992
TMX1	non-TF	1.46846e-16	-1.54122	0	0.771	2.98904e-12
DRC7	non-TF	1.49811e-15	-1.54127	0.044	0.857	3.04941e-11
BTG1	non-TF	3.0139e-10	-1.54216	0.309	1	6.13478e-06
TMEM178B	non-TF	7.37664e-17	-1.54409	0.044	0.914	1.50152e-12
HACD3	non-TF	2.12588e-10	-1.54446	0.221	0.971	4.32723e-06
TTC39B	non-TF	2.25836e-18	-1.54505	0.044	0.971	4.59689e-14
RNF150	non-TF	6.55941e-22	-1.54524	0	0.971	1.33517e-17
NUP98	non-TF	1.4894e-18	-1.54724	0.029	0.943	3.03167e-14
AMMECR1L	non-TF	2.61727e-20	-1.55024	0	0.914	5.32745e-16
EFR3A	non-TF	1.44652e-09	-1.5528	0.25	1	2.94438e-05
SPPL2A	non-TF	8.94712e-19	-1.55304	0.044	1	1.82119e-14
KNCN	non-TF	3.65502e-15	-1.55641	0.103	0.971	7.43979e-11
LIN7C	non-TF	1.71956e-16	-1.55658	0.029	0.857	3.50017e-12
TRAF3IP1	non-TF	2.71729e-12	-1.55784	0.103	0.857	5.53105e-08
HEYL	TF	7.50711e-16	-1.55811	0	0.743	1.52807e-11
MPRIP	non-TF	5.3214e-18	-1.56031	0.029	0.914	1.08317e-13
ATF3	TF	1.14658e-15	-1.56263	0.029	0.829	2.33386e-11		TRUE
MAT2A	non-TF	2.8012e-15	-1.56295	0.059	0.886	5.70184e-11		TRUE
LPIN1	non-TF	7.03808e-11	-1.56326	0.044	0.657	1.4326e-06		TRUE
POLB	non-TF	5.64404e-16	-1.56442	0.044	0.886	1.14884e-11		TRUE
MLXIP	TF	8.85104e-18	-1.56743	0.029	0.914	1.80163e-13
ZNF329	TF	6.55941e-22	-1.56855	0	0.971	1.33517e-17
ZSWIM4	non-TF	8.3926e-14	-1.57198	0	0.657	1.70831e-09
SPIRE1	non-TF	7.27649e-12	-1.5741	0	0.571	1.48113e-07
LRRC27	non-TF	4.1444e-13	-1.57708	0.118	0.914	8.43593e-09
DNAH11	non-TF	1.41728e-17	-1.58031	0.059	0.971	2.88487e-13
HMGCR	non-TF	6.08026e-12	-1.58108	0.191	1	1.23764e-07		TRUE
IP6K1	non-TF	5.08202e-17	-1.5815	0.029	0.886	1.03445e-12
DNAH9	non-TF	1.78326e-12	-1.58319	0.147	0.971	3.62983e-08
DUSP1	non-TF	7.18372e-13	-1.58433	0.015	0.657	1.46225e-08		TRUE
POGK	non-TF	2.89086e-18	-1.58495	0.015	0.886	5.88436e-14
ACTR2	non-TF	9.52107e-14	-1.58597	0.103	0.886	1.93801e-09		TRUE
REV3L	non-TF	9.29044e-12	-1.58913	0.162	0.914	1.89107e-07		TRUE
TCP1	non-TF	4.26778e-12	-1.59327	0.118	0.886	8.68706e-08
SHANK2	non-TF	1.77102e-15	-1.59339	0.088	0.971	3.60491e-11
ATP6AP1	non-TF	3.55355e-07	-1.59424	0.221	0.8	0.00723325
AMFR	non-TF	9.38489e-20	-1.59961	0.015	0.943	1.9103e-15
C2orf50	non-TF	9.92021e-11	-1.60044	0.074	0.714	2.01926e-06
AP3D1	non-TF	9.33117e-09	-1.60562	0.206	0.886	0.000189936
ACSS2	non-TF	1.85592e-18	-1.60939	0.029	0.943	3.77773e-14		TRUE
TGFA	non-TF	7.35886e-09	-1.61005	0	0.429	0.00014979		TRUE
RALGAPA1	non-TF	3.30592e-17	-1.61049	0.029	0.886	6.7292e-13
IFNAR1	non-TF	2.69088e-15	-1.61209	0.103	1	5.47729e-11		TRUE
PSAT1	non-TF	1.31539e-15	-1.61425	0.015	0.771	2.67747e-11
PDCD4	non-TF	8.07304e-16	-1.61477	0.103	1	1.64327e-11		TRUE
LMNA	non-TF	1.10969e-18	-1.61641	0.029	0.943	2.25878e-14		TRUE
OTUD7B	non-TF	2.1408e-18	-1.6188	0.015	0.886	4.3576e-14
MTMR7	non-TF	2.78542e-17	-1.619	0	0.8	5.66972e-13
SSR3	non-TF	1.34917e-14	-1.62366	0.118	0.971	2.74623e-10
RALGAPA2	non-TF	1.06927e-15	-1.62642	0.029	0.829	2.17649e-11
MREG	non-TF	1.47383e-17	-1.62732	0.015	0.857	2.99997e-13
BBS1	non-TF	9.85137e-23	-1.62755	0	1	2.00525e-18
BAZ2B	TF	1.62191e-13	-1.63338	0.132	0.971	3.3014e-09		TRUE
GNB1	non-TF	1.25934e-09	-1.63349	0.279	0.943	2.56338e-05
MICU3	non-TF	3.72777e-18	-1.63468	0.044	0.971	7.58787e-14
AARS	non-TF	1.4894e-18	-1.63474	0.029	0.943	3.03167e-14
PTP4A1	non-TF	4.02765e-14	-1.63482	0.015	0.714	8.19828e-10		TRUE
MAP4K4	non-TF	6.65658e-13	-1.63537	0.059	0.771	1.35495e-08		TRUE
ABCB8	non-TF	2.33937e-12	-1.63548	0.029	0.686	4.76178e-08
SUPT6H	non-TF	3.38809e-15	-1.63601	0.074	0.914	6.89645e-11
STXBP4	non-TF	9.85137e-23	-1.63832	0	1	2.00525e-18
NAPA	non-TF	2.62172e-15	-1.64383	0.059	0.886	5.3365e-11
USP22	non-TF	8.15376e-12	-1.64457	0.118	0.857	1.6597e-07
PEG3	TF	1.46846e-16	-1.6461	0	0.771	2.98904e-12
PRNP	non-TF	7.57279e-16	-1.64782	0.103	1	1.54144e-11		TRUE
TBCK	non-TF	9.85137e-23	-1.65348	0	1	2.00525e-18
KIF6	non-TF	4.04684e-16	-1.65394	0.015	0.8	8.23734e-12		TRUE
SRCAP	non-TF	9.85137e-23	-1.65467	0	1	2.00525e-18
ZNF667	TF	5.12016e-18	-1.65503	0	0.829	1.04221e-13
YKT6	non-TF	2.97877e-08	-1.6556	0.029	0.486	0.000606328
KIAA1549	TF	1.8712e-17	-1.65769	0.059	0.971	3.80883e-13
CYB5D1	non-TF	4.37896e-19	-1.65795	0.015	0.914	8.91337e-15
CIAPIN1	non-TF	7.987e-18	-1.66004	0.044	0.943	1.62575e-13
RAB11A	non-TF	1.74186e-13	-1.6604	0.162	0.971	3.54556e-09
LRTM2	non-TF	7.81973e-09	-1.66362	0.235	0.886	0.000159171
MAST2	non-TF	2.0383e-12	-1.66476	0.118	0.886	4.14896e-08
CFAP45	non-TF	5.73185e-11	-1.66509	0.103	0.8	1.16672e-06
CLTC	non-TF	1.25656e-10	-1.66536	0.191	0.886	2.55772e-06
TTC29	non-TF	5.45608e-16	-1.66785	0.059	0.914	1.11058e-11
BDP1	non-TF	6.68034e-14	-1.67105	0.147	1	1.35978e-09
AP3M2	non-TF	3.27752e-13	-1.67213	0.118	0.914	6.67139e-09
ANKRD26	non-TF	3.50024e-16	-1.67548	0.015	0.8	7.12475e-12
SRPRA	non-TF	3.43135e-18	-1.67572	0.029	0.914	6.98451e-14
IPO5	non-TF	7.50711e-16	-1.67781	0	0.743	1.52807e-11
PDS5A	non-TF	2.308e-18	-1.6812	0.015	0.886	4.69793e-14
TEF	TF	8.3926e-14	-1.68175	0	0.657	1.70831e-09
HSPH1	non-TF	1.68976e-07	-1.68418	0.279	0.857	0.0034395
HSP90AB1	non-TF	2.14022e-14	-1.68591	0.941	1	4.35643e-10		TRUE
LUC7L	non-TF	1.79306e-12	-1.69035	0.088	0.829	3.64977e-08
DNAJC5	non-TF	1.43514e-11	-1.69131	0.074	0.771	2.92122e-07
CHRNA1	non-TF	9.85137e-23	-1.69206	0	1	2.00525e-18		TRUE
DALRD3	non-TF	2.83794e-16	-1.69528	0.044	0.886	5.77662e-12
FAM120B	non-TF	7.34588e-15	-1.70078	0.074	0.914	1.49525e-10
COPS8	non-TF	3.54644e-10	-1.70154	0.221	0.943	7.21879e-06
TMEM117	non-TF	3.72356e-20	-1.702	0.015	0.943	7.5793e-16
ATP6V1B2	non-TF	1.04741e-12	-1.703	0.147	0.943	2.132e-08		TRUE
OSBPL3	non-TF	4.95665e-12	-1.70539	0.103	0.829	1.00893e-07
TRRAP	non-TF	6.04346e-16	-1.70562	0.044	0.886	1.23015e-11
SYNE1	non-TF	8.3926e-14	-1.70617	0	0.657	1.70831e-09
ZNF106	non-TF	1.46357e-13	-1.70809	0.132	1	2.97909e-09
KARS	non-TF	8.46964e-13	-1.71358	0.074	0.8	1.724e-08
HCFC1	non-TF	7.60643e-14	-1.71587	0.059	0.829	1.54829e-09
BRWD1	non-TF	3.17777e-17	-1.7213	0.044	0.914	6.46835e-13
FBXW7	non-TF	9.76829e-10	-1.72384	0.176	0.857	1.98834e-05		TRUE
SYN3	non-TF	4.33753e-19	-1.72981	0.044	1	8.82905e-15
ABL2	non-TF	9.11513e-19	-1.73148	0	0.857	1.85538e-14		TRUE
GOLT1B	non-TF	1.75408e-15	-1.73472	0.015	0.771	3.57042e-11
HECTD1	non-TF	1.43318e-20	-1.73546	0.015	0.971	2.91724e-16
PFKFB2	non-TF	1.9511e-21	-1.73687	0.015	1	3.97146e-17
CDK14	non-TF	3.83525e-11	-1.74329	0.147	0.886	7.80665e-07		TRUE
LAPTM4B	non-TF	4.50809e-17	-1.74337	0.059	0.943	9.17621e-13
USP54	non-TF	3.81647e-17	-1.74563	0.029	0.886	7.76842e-13
ARHGEF28	non-TF	1.28577e-18	-1.74591	0.029	0.943	2.61719e-14		TRUE
PRRC2C	non-TF	2.65947e-11	-1.74925	0.206	1	5.41336e-07
CFAP44	non-TF	6.56321e-15	-1.74948	0.118	1	1.33594e-10		TRUE
DDIT3	TF	3.991e-13	-1.75475	0.074	0.829	8.12367e-09		TRUE
NCEH1	non-TF	3.02455e-19	-1.75783	0.029	0.971	6.15647e-15
GLDN	non-TF	2.61727e-20	-1.75958	0	0.914	5.32745e-16
ZNF292	TF	2.16901e-11	-1.76505	0.103	0.829	4.41501e-07
KLF13	TF	7.08303e-14	-1.77336	0.147	1	1.44175e-09
UBR4	non-TF	5.85964e-16	-1.77576	0.103	1	1.19273e-11
KMT2D	non-TF	2.6705e-21	-1.77755	0.015	1	5.4358e-17		TRUE
MOB3C	non-TF	4.61643e-18	-1.7796	0.044	0.971	9.39675e-14
SPECC1L	non-TF	3.72392e-15	-1.77976	0	0.714	7.58004e-11		TRUE
EPB41L5	non-TF	7.987e-18	-1.78208	0.044	0.943	1.62575e-13
B4GALT5	non-TF	3.76837e-15	-1.78211	0.088	0.943	7.67051e-11
APBA1	non-TF	1.75623e-12	-1.78291	0.235	1	3.5748e-08		TRUE
EEF1G	non-TF	6.61323e-19	-1.7848	0.029	0.943	1.34612e-14
CCT7	non-TF	6.24133e-12	-1.78727	0.368	0.971	1.27042e-07
ZC3H11B	non-TF	7.50711e-16	-1.79169	0	0.743	1.52807e-11
NBAS	non-TF	1.24831e-14	-1.79577	0.132	0.971	2.54093e-10
ZFAND5	non-TF	7.30045e-17	-1.79726	0.029	0.857	1.48601e-12
DNAJC18	non-TF	2.11057e-21	-1.79727	0.015	1	4.29607e-17
MCOLN3	non-TF	9.11513e-19	-1.79854	0	0.857	1.85538e-14		TRUE
CLRN1	non-TF	2.18371e-11	-1.80043	0.059	0.714	4.44495e-07
UBE2H	non-TF	4.33174e-12	-1.8007	0.162	0.914	8.81725e-08
TNFAIP1	non-TF	3.25492e-16	-1.80084	0.015	0.8	6.62538e-12		TRUE
MAP3K1	non-TF	9.85137e-23	-1.80176	0	1	2.00525e-18		TRUE
ETNK1	non-TF	1.76335e-11	-1.80199	0.235	1	3.5893e-07
TAOK1	non-TF	2.4077e-15	-1.80271	0.088	0.943	4.90087e-11		TRUE
RUNX1T1	non-TF	6.55941e-22	-1.80426	0	0.971	1.33517e-17
CCDC157	non-TF	6.83278e-14	-1.80716	0.103	0.914	1.39081e-09
TNFRSF21	non-TF	1.81428e-16	-1.80894	0.074	0.971	3.69296e-12
NXF1	non-TF	9.11513e-19	-1.81603	0	0.857	1.85538e-14
SRGAP3	non-TF	3.41005e-17	-1.81633	0.044	0.914	6.94116e-13
FSCN2	non-TF	9.28249e-17	-1.81937	0.074	0.971	1.88945e-12
SREK1	non-TF	1.32267e-10	-1.82346	0.176	0.886	2.6923e-06
DYNC2H1	non-TF	1.38315e-15	-1.83008	0.118	1	2.8154e-11		TRUE
BCLAF1	TF	1.33532e-09	-1.83367	0.191	0.857	2.71805e-05
PYGO1	non-TF	2.61727e-20	-1.83373	0	0.914	5.32745e-16
GSTM2	non-TF	8.3926e-14	-1.83812	0	0.657	1.70831e-09
ARF3	non-TF	3.30967e-09	-1.83903	0.25	0.914	6.73683e-05
ATF4	TF	4.52967e-16	-1.83997	0.103	1	9.22015e-12		TRUE
CTDSP2	non-TF	1.05112e-11	-1.85462	0.029	0.657	2.13955e-07
HYDIN	non-TF	2.36335e-11	-1.85518	0.25	1	4.8106e-07
HERC1	non-TF	3.35723e-17	-1.86253	0.074	0.971	6.83365e-13
RNF157	non-TF	7.41754e-12	-1.86375	0.176	0.971	1.50984e-07
SPIN1	non-TF	3.21166e-15	-1.8644	0.029	0.8	6.53733e-11
PPIL4	non-TF	1.06498e-15	-1.86685	0.044	0.857	2.16776e-11
SIX4	TF	8.25899e-19	-1.86929	0.029	0.943	1.68112e-14
RAB14	non-TF	1.07659e-13	-1.87044	0.118	0.886	2.19141e-09
NUP153	non-TF	4.59859e-18	-1.87216	0.029	0.914	9.36043e-14
SFR1	non-TF	1.43492e-19	-1.87723	0.029	0.971	2.92078e-15
TANC1	non-TF	2.75763e-11	-1.8781	0.029	0.629	5.61316e-07		TRUE
RAB11B	non-TF	8.01574e-14	-1.88297	0.132	0.971	1.6316e-09
TCP11L2	non-TF	2.1408e-18	-1.88805	0.015	0.886	4.3576e-14
LZTFL1	non-TF	7.53403e-16	-1.88869	0.029	0.829	1.53355e-11
NCALD	non-TF	1.08319e-12	-1.88992	0.015	0.657	2.20484e-08
SIDT2	non-TF	6.25108e-13	-1.89517	0.059	0.771	1.27241e-08
TTC24	non-TF	2.24632e-19	-1.89611	0.029	0.971	4.57239e-15
NFIA	TF	8.462e-16	-1.89724	0.103	0.971	1.72244e-11
FAM32A	non-TF	9.46594e-16	-1.905	0.118	1	1.92679e-11
CTSD	non-TF	9.74042e-12	-1.90545	0.176	0.943	1.98266e-07		TRUE
EMB	non-TF	1.17944e-17	-1.90639	0.015	0.857	2.40074e-13
TOMM34	non-TF	2.57965e-13	-1.90787	0.059	0.8	5.25087e-09
SMAD3	TF	3.20853e-08	-1.90808	0.044	0.514	0.000653096		TRUE
DNAH5	non-TF	1.51937e-17	-1.91491	0.059	0.971	3.09268e-13
CA12	non-TF	2.95111e-08	-1.92071	0.235	0.886	0.000600698		TRUE
RRP1	non-TF	6.2704e-20	-1.92226	0.029	0.971	1.27634e-15
HSPA4L	non-TF	1.13919e-14	-1.92298	0.132	1	2.31882e-10
PLXNA4	non-TF	5.7046e-18	-1.92976	0.059	0.971	1.16117e-13
MIER3	TF	2.61727e-20	-1.93091	0	0.914	5.32745e-16
ARL8B	non-TF	3.89515e-16	-1.93141	0.059	0.914	7.92858e-12
USH2A	non-TF	5.91874e-20	-1.93315	0.015	0.943	1.20476e-15
CDKN2D	non-TF	8.84057e-13	-1.93573	0.147	0.943	1.7995e-08		TRUE
HDAC4	non-TF	1.21603e-21	-1.93775	0.015	1	2.47524e-17		TRUE
SDCBP	non-TF	7.43971e-16	-1.94372	0.103	0.971	1.51435e-11
SLC38A2	non-TF	2.64411e-08	-1.94779	0.074	0.571	0.000538209		TRUE
ATRX	non-TF	1.48132e-10	-1.95104	0.279	0.971	3.01522e-06		TRUE
USP37	non-TF	6.55941e-22	-1.95339	0	0.971	1.33517e-17
ATP8A1	non-TF	1.24424e-14	-1.95377	0.029	0.771	2.53264e-10
GHITM	non-TF	2.04469e-12	-1.95558	0.397	1	4.16196e-08
EIF4ENIF1	non-TF	3.64482e-13	-1.95625	0.044	0.743	7.41903e-09
IPO13	non-TF	3.18861e-18	-1.95881	0.029	0.914	6.49041e-14		TRUE
TMEM263	non-TF	4.21584e-21	-1.96079	0	0.943	8.58135e-17
NBR1	non-TF	4.6789e-14	-1.96098	0.074	0.857	9.5239e-10
SOS2	non-TF	8.37129e-17	-1.96371	0.059	0.943	1.70398e-12
FRYL	non-TF	1.26936e-13	-1.9648	0.118	0.914	2.58379e-09
AFAP1	non-TF	6.5231e-15	-1.96571	0.088	0.914	1.32778e-10
PLPPR4	non-TF	8.89282e-19	-1.96929	0.029	0.943	1.81013e-14
SRSF2	non-TF	4.97261e-15	-1.97054	0.132	0.971	1.01217e-10		TRUE
PITPNA	non-TF	7.0876e-12	-1.97334	0.294	1	1.44268e-07
ATP6V1A	non-TF	3.28845e-09	-1.97495	0.279	0.943	6.69364e-05
EPHA4	non-TF	4.21584e-21	-1.97578	0	0.943	8.58135e-17		TRUE
ZNF276	TF	7.50711e-16	-1.97756	0	0.743	1.52807e-11
DOCK10	non-TF	4.21584e-21	-1.98118	0	0.943	8.58135e-17		TRUE
ZBTB11	TF	1.12551e-20	-1.98187	0.029	1	2.29098e-16
CCDC81	non-TF	1.83037e-11	-1.98466	0.221	0.943	3.72571e-07
ESPNL	non-TF	9.71586e-21	-1.98555	0.015	0.971	1.97766e-16
MDH2	non-TF	6.09602e-15	-1.98669	0.265	1	1.24084e-10		TRUE
VEPH1	non-TF	3.58622e-14	-1.99807	0.162	1	7.29976e-10
CALML4	non-TF	8.06719e-18	-2.00836	0.074	1	1.64208e-13
PDE5A	non-TF	1.22705e-20	-2.01609	0.015	0.971	2.49765e-16		TRUE
MYO15A	non-TF	3.14029e-10	-2.01731	0.588	1	6.39206e-06
PEAK1	non-TF	2.01468e-14	-2.03349	0.118	0.943	4.10088e-10
NSD1	non-TF	1.40334e-13	-2.03711	0.132	0.943	2.8565e-09
CHRNA9	non-TF	2.21253e-13	-2.06329	0.265	0.971	4.5036e-09		TRUE
LRRC58	non-TF	1.31135e-20	-2.06425	0.029	1	2.66925e-16
STK36	non-TF	6.99468e-18	-2.06663	0.015	0.857	1.42377e-13		TRUE
PLS1	non-TF	4.34337e-14	-2.0705	0.647	1	8.84093e-10
RAPH1	non-TF	9.11513e-19	-2.07686	0	0.857	1.85538e-14
NDRG3	non-TF	2.18371e-11	-2.08356	0.059	0.714	4.44495e-07
ATP11A	non-TF	5.12016e-18	-2.0866	0	0.829	1.04221e-13
TTC21A	non-TF	8.11201e-17	-2.08967	0.074	0.971	1.6512e-12
CFAP20	non-TF	1.37424e-15	-2.09235	0.162	1	2.79727e-11
FADS1	non-TF	6.25108e-13	-2.09598	0.059	0.771	1.27241e-08
ACTR10	non-TF	2.55391e-14	-2.10695	0.176	1	5.19847e-10
CCDC33	non-TF	3.74002e-14	-2.11177	0.191	0.971	7.61282e-10
MYSM1	TF	1.31595e-21	-2.11926	0.015	1	2.67862e-17
ALG11	non-TF	5.09666e-19	-2.12353	0.015	0.914	1.03743e-14
TTC3	non-TF	5.42078e-15	-2.12596	0.265	1	1.1034e-10
VWA3A	non-TF	2.25836e-18	-2.12915	0.044	0.971	4.59689e-14
MAP1B	non-TF	1.59307e-10	-2.13654	0.662	1	3.24269e-06
HMG20A	TF	2.96283e-18	-2.1366	0.029	0.914	6.03084e-14
C1orf43	non-TF	2.69088e-15	-2.13782	0.118	0.971	5.47729e-11
AP3B2	non-TF	4.66667e-14	-2.14047	0.441	1	9.49901e-10
SMIM6	non-TF	1.01625e-17	-2.1547	0.015	0.857	2.06858e-13
GNA11	non-TF	1.21492e-20	-2.15703	0.029	1	2.47297e-16		TRUE
ACTG1	non-TF	8.72653e-12	-2.16378	0.603	1	1.77629e-07		TRUE
LHFPL5	non-TF	1.57053e-19	-2.16714	0	0.886	3.19681e-15
NBEAL1	non-TF	2.55365e-17	-2.17024	0.074	0.971	5.19795e-13
RNF128	non-TF	2.10067e-17	-2.19399	0.059	0.943	4.27591e-13
CCDC65	non-TF	2.08043e-15	-2.20462	0.132	0.971	4.23471e-11
DUSP3	non-TF	5.64025e-21	-2.22254	0.029	1	1.14807e-16		TRUE
ZDHHC13	non-TF	9.43231e-18	-2.22387	0.015	0.857	1.91995e-13
ZMIZ1	TF	9.2869e-20	-2.24137	0.044	1	1.89035e-15
NUFIP2	non-TF	9.71586e-21	-2.24471	0.015	0.971	1.97766e-16
RASAL2	non-TF	6.31743e-14	-2.24722	0.191	0.971	1.28591e-09
NISCH	non-TF	1.94898e-16	-2.25095	0.103	1	3.96715e-12
SH2D4B	non-TF	3.14721e-15	-2.25175	0.147	0.971	6.40616e-11
RNF24	non-TF	1.57053e-19	-2.25262	0	0.886	3.19681e-15
DNMT3A	non-TF	1.58824e-17	-2.25399	0.059	0.943	3.23287e-13		TRUE
KCNB1	non-TF	8.98731e-21	-2.25766	0.015	0.971	1.82937e-16		TRUE
MTMR11	non-TF	8.98731e-21	-2.26318	0.015	0.971	1.82937e-16
C1orf158	non-TF	1.8817e-15	-2.26641	0.118	0.943	3.83019e-11
LRRK1	non-TF	7.50711e-16	-2.26767	0	0.743	1.52807e-11
ZNF253	TF	2.41022e-20	-2.26846	0.029	1	4.90601e-16
NEDD4	non-TF	9.85137e-23	-2.27473	0	1	2.00525e-18		TRUE
TRIB2	non-TF	4.23251e-19	-2.27792	0.029	0.943	8.61528e-15		TRUE
SFRP1	non-TF	2.61727e-20	-2.28157	0	0.914	5.32745e-16
XIRP2	non-TF	1.74449e-14	-2.28945	0.368	1	3.55091e-10		TRUE
DUSP14	non-TF	8.21891e-16	-2.29086	0.088	0.914	1.67296e-11
CYFIP2	non-TF	5.70066e-19	-2.30881	0.029	0.943	1.16037e-14
UNC119B	non-TF	6.3925e-20	-2.31165	0.015	0.943	1.30119e-15
EIF3A	non-TF	7.95311e-19	-2.31266	0.059	1	1.61886e-14		TRUE
IDH1	non-TF	7.3924e-17	-2.31376	0.074	0.943	1.50472e-12		TRUE
GID8	non-TF	3.63353e-16	-2.32506	0.118	1	7.39604e-12
TMEM41B	non-TF	5.47972e-20	-2.32844	0.015	0.943	1.1154e-15
ZNF263	TF	1.09485e-17	-2.33	0.015	0.857	2.22856e-13
SLC25A4	non-TF	1.75674e-15	-2.33134	0.368	1	3.57585e-11		TRUE
INAFM2	non-TF	3.71983e-12	-2.33884	0.029	0.657	7.57171e-08
CFAP52	non-TF	1.78825e-17	-2.34228	0.103	1	3.63997e-13
HERPUD1	non-TF	1.79206e-14	-2.34789	0.176	1	3.64774e-10
SLC17A8	non-TF	1.57053e-19	-2.36003	0	0.886	3.19681e-15
KLHL9	non-TF	3.83366e-21	-2.36382	0.029	1	7.80341e-17
BHLHE41	TF	4.69002e-22	-2.36824	0.015	1	9.54654e-18
TMF1	TF	2.71929e-16	-2.3738	0.294	1	5.53511e-12
HMGCS1	non-TF	5.28471e-12	-2.37969	0.162	0.857	1.0757e-07		TRUE
CGN	non-TF	6.45032e-14	-2.39489	0.162	0.943	1.31296e-09
CYP51A1	non-TF	6.3925e-20	-2.39648	0.015	0.943	1.30119e-15		TRUE
UBN2	non-TF	8.62363e-20	-2.40188	0.044	1	1.75534e-15
KDM5A	non-TF	1.58698e-16	-2.40773	0.103	0.943	3.23031e-12		TRUE
TTC7A	non-TF	1.55755e-14	-2.41251	0.103	0.914	3.17039e-10
GTF2A1	non-TF	1.43492e-19	-2.42785	0.029	0.971	2.92078e-15
ASB1	non-TF	1.52747e-20	-2.43136	0.029	1	3.10916e-16
MAN2A2	non-TF	4.63121e-20	-2.43523	0.029	0.971	9.42683e-16
GAS6	non-TF	9.85137e-23	-2.43567	0	1	2.00525e-18		TRUE
DNAH6	non-TF	9.85137e-23	-2.43765	0	1	2.00525e-18
MKRN2OS	non-TF	3.63647e-19	-2.44153	0.074	1	7.40203e-15
EEF2	non-TF	1.97251e-13	-2.45359	0.265	1	4.01504e-09		TRUE
PTP4A2	non-TF	1.19186e-17	-2.46547	0.103	1	2.42603e-13
ZNF512B	TF	1.4683e-18	-2.46574	0.015	0.886	2.98873e-14
PGM2L1	non-TF	7.96897e-15	-2.47447	0.412	1	1.62208e-10
SEMA6D	non-TF	9.11513e-19	-2.48785	0	0.857	1.85538e-14
LPIN2	non-TF	6.80945e-15	-2.49744	0.059	0.829	1.38606e-10
PHIP	non-TF	1.50548e-19	-2.52016	0.059	1	3.0644e-15
SDHA	non-TF	3.36453e-17	-2.5294	0.103	0.971	6.84849e-13
BACE1	non-TF	1.71372e-15	-2.53439	0.029	0.8	3.48827e-11		TRUE
CLK1	non-TF	5.81351e-20	-2.55407	0.029	0.971	1.18334e-15		TRUE
HBP1	TF	1.54078e-21	-2.57145	0.015	1	3.13627e-17
DHRS3	non-TF	2.02633e-07	-2.59291	0.25	0.686	0.0041246
PURB	TF	6.70256e-19	-2.59565	0.059	0.971	1.36431e-14
NKTR	non-TF	8.94987e-18	-2.61964	0.088	1	1.82175e-13
TTLL3	non-TF	6.57922e-21	-2.61973	0.029	1	1.3392e-16
CCDC39	non-TF	6.57922e-21	-2.627	0.029	1	1.3392e-16
OSBPL11	non-TF	6.09187e-21	-2.64159	0.029	1	1.24e-16
SLC5A3	non-TF	1.69868e-18	-2.64543	0.088	1	3.45767e-14		TRUE
AIF1L	non-TF	4.83614e-15	-2.64723	0.088	0.886	9.84396e-11
PPM1H	non-TF	1.21603e-21	-2.65909	0.015	1	2.47524e-17
ORMDL3	non-TF	1.58941e-18	-2.65974	0.059	0.971	3.23524e-14
CSDE1	TF	1.09665e-13	-2.69669	0.191	0.914	2.23224e-09
LGMN	non-TF	9.85137e-23	-2.7074	0	1	2.00525e-18		TRUE
RFX2	TF	6.10117e-16	-2.71664	0.029	0.829	1.24189e-11
TP53INP1	non-TF	2.59882e-13	-2.71774	0.088	0.829	5.2899e-09
ST8SIA2	non-TF	9.71202e-18	-2.73892	0.059	0.943	1.97688e-13
MED1	non-TF	1.57053e-19	-2.74181	0	0.886	3.19681e-15
DPYSL2	non-TF	2.35351e-15	-2.74419	0.206	1	4.79057e-11		TRUE
TMOD1	non-TF	4.84225e-18	-2.75148	0.074	0.971	9.85641e-14
BRAF	non-TF	3.40945e-18	-2.75424	0.088	1	6.93993e-14		TRUE
ACBD7	non-TF	3.03853e-21	-2.7569	0.029	1	6.18492e-17
SEC61A1	non-TF	3.27198e-20	-2.76578	0.044	1	6.66012e-16
GSK3B	non-TF	1.52937e-19	-2.76865	0.074	1	3.11303e-15		TRUE
LPGAT1	non-TF	4.14197e-21	-2.77991	0.029	1	8.43098e-17
NEFM	non-TF	3.73128e-18	-2.78699	0.103	1	7.59503e-14
VCL	non-TF	5.07942e-22	-2.78801	0.015	1	1.03392e-17
DENND5B	non-TF	7.56098e-22	-2.83276	0.015	1	1.53904e-17
POLE	non-TF	9.11513e-19	-2.83606	0	0.857	1.85538e-14		TRUE
ACTB	non-TF	7.26226e-16	-2.84575	0.382	1	1.47823e-11		TRUE
OTOF	non-TF	2.43164e-14	-2.85332	0.456	1	4.9496e-10
SDC4	non-TF	2.2647e-16	-2.87258	0.221	1	4.60979e-12
CCDC6	non-TF	5.78782e-19	-2.88449	0.029	0.914	1.17811e-14
CANX	non-TF	3.09685e-16	-2.90069	0.206	1	6.30364e-12		TRUE
HIPK1	non-TF	2.17868e-18	-2.90777	0.059	0.943	4.4347e-14		TRUE
ZYX	non-TF	1.60681e-14	-2.91248	0.015	0.714	3.27066e-10
FAM149A	non-TF	6.55941e-22	-2.92404	0	0.971	1.33517e-17
CFAP46	non-TF	1.00293e-15	-2.93517	0.206	1	2.04146e-11
RBM24	non-TF	4.06109e-18	-2.95209	0.147	1	8.26634e-14
PPP1R15A	non-TF	1.61959e-19	-2.95714	0.059	1	3.29667e-15
LOXHD1	non-TF	3.28353e-21	-3.00627	0.029	1	6.68363e-17
NRXN3	non-TF	3.1496e-19	-3.05699	0.074	1	6.41101e-15
UBC	non-TF	2.43164e-14	-3.06055	0.456	1	4.9496e-10		TRUE
ANXA5	non-TF	1.11454e-16	-3.06484	0.412	1	2.26865e-12		TRUE
TUFT1	non-TF	9.59161e-22	-3.09643	0.015	1	1.95237e-17
YWHAZ	non-TF	5.35819e-19	-3.12979	0.162	1	1.09066e-14
ADO	non-TF	5.50078e-22	-3.15426	0.015	1	1.11968e-17		TRUE
CFAP43	non-TF	8.11206e-19	-3.19625	0.132	1	1.65121e-14
SGK1	non-TF	1.27158e-16	-3.22189	0.088	0.914	2.5883e-12		TRUE
CDON	non-TF	6.55941e-22	-3.23338	0	0.971	1.33517e-17
C11orf87	non-TF	3.06927e-09	-3.24282	0.5	0.971	6.24749e-05
CLU	non-TF	5.21591e-15	-3.27347	0.059	0.829	1.0617e-10		TRUE
GRK4	non-TF	2.67853e-22	-3.27523	0.015	1	5.45214e-18		TRUE
DUSP8	non-TF	4.80578e-21	-3.33858	0.015	0.971	9.78217e-17
CFAP161	non-TF	9.85137e-23	-3.35318	0	1	2.00525e-18
CPE	non-TF	8.26965e-15	-3.4612	0.515	1	1.68329e-10
CLDN9	non-TF	6.79915e-17	-3.49081	0.235	1	1.38397e-12
MN1	non-TF	9.85137e-23	-3.50498	0	1	2.00525e-18
ZWINT	non-TF	4.69002e-22	-3.58868	0.015	1	9.54654e-18
FBXO32	non-TF	6.23416e-20	-3.60765	0.059	1	1.26896e-15
ALDOA	non-TF	1.86404e-21	-3.62119	0.015	0.971	3.79426e-17
HSPA8	non-TF	1.25688e-16	-3.64091	0.574	1	2.55837e-12		TRUE
CHRNA10	non-TF	6.12876e-21	-3.66364	0.059	1	1.24751e-16		TRUE
HSD17B7	non-TF	1.89721e-20	-3.68584	0.059	1	3.86176e-16
KCNA10	non-TF	2.11235e-21	-3.87151	0.044	1	4.2997e-17		TRUE
PCDH20	non-TF	9.22752e-19	-3.96619	0.044	0.914	1.87826e-14
EGR1	TF	4.68504e-17	-3.96883	0.176	1	9.53641e-13		TRUE
TWF1	non-TF	3.74994e-18	-4.03536	0.235	1	7.633e-14
TSPAN12	non-TF	4.21584e-21	-4.08555	0	0.943	8.58135e-17
KCNQ1OT1	non-TF	1.05104e-21	-5.35373	0.044	1	2.1394e-17
SPP1	non-TF	3.71022e-18	-6.64237	0.044	0.914	7.55215e-14		TRUE

## Sheet: Table S4. Type II HC
Table S4. Differential expression analysis between human and mouse type II HC, Wilcoxon rank-sum test with a Bonferroni Padj < .05, log2 FC > |2|. Related to Figure 4b.
Transcription factors (TF) were detected using AnimalTFDB 3.0, druggable targets using DGIdb 4.0.
Gene	TF	p_val	avg_log2FC	pct.1	pct.2	p_val_adj	Type_II_enriched	Drug
CXCL14	non-TF	7.44627e-10	5.89363	1	1	1.51569e-05	TRUE
SKP1	non-TF	1.17598e-13	5.83949	1	0	2.39371e-09
S100A13	non-TF	7.36216e-10	5.31879	1	0.875	1.49857e-05
SCGB2A1	non-TF	1.17598e-13	5.02331	1	0	2.39371e-09
FBXO2	non-TF	7.44627e-10	5.00775	1	1	1.51569e-05
CALB1	non-TF	2.37127e-11	4.80217	0.947	0.1	4.82672e-07	TRUE
MINDY4B	non-TF	1.17598e-13	3.87758	1	0	2.39371e-09
CST3	non-TF	7.44627e-10	3.85619	1	0.975	1.51569e-05	TRUE	TRUE
UQCRB	non-TF	7.36216e-10	3.78293	1	0.875	1.49857e-05		TRUE
ATP5F1E	non-TF	2.68794e-08	3.74166	0.947	0.85	0.00054713		TRUE
UQCRQ	non-TF	7.40411e-10	3.70922	1	0.9	1.50711e-05
C1orf232	non-TF	1.17598e-13	3.46117	1	0	2.39371e-09
ATP6V1F	non-TF	6.95425e-10	3.44022	1	0.775	1.41554e-05
NDUFA4	non-TF	7.44627e-10	3.42012	1	1	1.51569e-05		TRUE
NDUFB2	non-TF	1.02239e-08	3.40393	0.947	0.575	0.000208107		TRUE
ABCA5	non-TF	3.29009e-08	3.30183	0.947	0.9	0.000669697		TRUE
SELENOM	non-TF	1.17598e-13	3.23467	1	0	2.39371e-09
COX17	non-TF	7.44627e-10	3.21101	1	0.975	1.51569e-05
FKBP2	non-TF	1.76975e-07	3.19455	0.895	0.575	0.00360232
JUND	TF	7.42938e-10	3.18932	1	0.925	1.51225e-05		TRUE
B2M	non-TF	7.40411e-10	3.17606	1	0.9	1.50711e-05	TRUE	TRUE
PCSK1N	non-TF	3.59208e-11	3.16604	0.842	0	7.31169e-07
PTRH1	non-TF	3.35679e-10	3.1499	0.947	0.225	6.83275e-06
FAU	non-TF	9.99735e-07	3.11444	0.895	0.95	0.0203496
TSTD1	non-TF	7.20327e-10	3.05233	0.947	0.275	1.46623e-05
COX7C	non-TF	2.99924e-08	3.04992	0.947	0.9	0.000610495
CSRP2	non-TF	5.67015e-12	2.99556	0.895	0	1.15416e-07	TRUE
NDUFC2	non-TF	7.44205e-10	2.98927	1	0.95	1.51483e-05		TRUE
UQCR10	non-TF	7.44627e-10	2.97235	1	1	1.51569e-05		TRUE
OST4	non-TF	7.42938e-10	2.95838	1	0.925	1.51225e-05
CCNI	non-TF	7.44627e-10	2.93947	1	1	1.51569e-05
SRI	non-TF	1.85076e-09	2.90816	1	0.95	3.76722e-05		TRUE
TIMP1	non-TF	3.59208e-11	2.8931	0.842	0	7.31169e-07
COPS9	non-TF	5.67015e-12	2.8791	0.895	0	1.15416e-07
SRP14	non-TF	7.44627e-10	2.86699	1	0.975	1.51569e-05
C2orf40	non-TF	8.26473e-08	2.81727	0.842	0.275	0.00168229
SERF2	non-TF	3.47574e-08	2.81168	0.947	0.975	0.000707488
H2AFZ	non-TF	5.67015e-12	2.80941	0.895	0	1.15416e-07
TMA7	non-TF	3.31439e-08	2.79414	0.947	0.95	0.000674643
SELENOW	non-TF	8.42554e-13	2.77612	0.947	0	1.71502e-08
FAM107A	non-TF	2.14685e-10	2.70553	0.789	0	4.36991e-06
SELENOK	non-TF	1.21311e-09	2.69551	0.737	0	2.46928e-05
BEX3	non-TF	3.59208e-11	2.67393	0.842	0	7.31169e-07
GNAS	non-TF	9.73468e-09	2.62432	0.947	0.5	0.000198149	TRUE	TRUE
TOMM7	non-TF	8.24795e-10	2.61926	1	0.975	1.67887e-05
LAPTM4A	non-TF	2.41983e-07	2.5813	0.895	0.625	0.00492557
METRN	non-TF	3.62609e-07	2.57316	0.737	0.15	0.00738091
PCBD1	non-TF	5.1998e-09	2.55946	0.789	0.075	0.000105842		TRUE
SSR4	non-TF	2.47991e-07	2.55574	0.895	0.6	0.00504786
COX7A2	non-TF	4.36788e-08	2.5258	0.947	0.95	0.000889083
NDUFA1	non-TF	7.66579e-07	2.50794	0.895	0.875	0.0156037		TRUE
ELOB	non-TF	1.21311e-09	2.5074	0.737	0	2.46928e-05
S100A1	non-TF	7.44627e-10	2.49806	1	1	1.51569e-05
C20orf85	non-TF	3.59208e-11	2.49728	0.842	0	7.31169e-07
DUT	non-TF	5.10237e-08	2.46727	0.789	0.15	0.00103859		TRUE
TMEM205	non-TF	1.33282e-09	2.44764	0.895	0.175	2.71295e-05
AGR2	non-TF	7.37272e-07	2.4306	0.526	0	0.0150072
COX5B	non-TF	1.11669e-09	2.4055	1	0.925	2.27302e-05
PRDX1	non-TF	5.75321e-08	2.40389	0.947	1	0.00117107		TRUE
H1FX	non-TF	2.14685e-10	2.40308	0.789	0	4.36991e-06
PPDPF	non-TF	6.84168e-09	2.40167	0.947	0.425	0.000139262
EID1	non-TF	1.92658e-08	2.39717	0.947	0.65	0.000392156
MRPL57	non-TF	1.49183e-06	2.35213	0.895	0.9	0.0303662
COX20	non-TF	3.63522e-07	2.34482	0.895	0.7	0.00739948
CLTA	non-TF	5.14846e-07	2.34076	0.895	0.775	0.0104797
LMO7	non-TF	3.83945e-08	2.33942	0.842	0.2	0.00078152
FTH1	non-TF	7.44627e-10	2.32988	1	1	1.51569e-05		TRUE
FAM81B	non-TF	6.49499e-09	2.32892	0.684	0	0.000132205
ERP29	non-TF	5.32586e-08	2.32853	0.947	0.625	0.00108408
ATP5MPL	non-TF	1.21311e-09	2.32421	0.737	0	2.46928e-05
COPRS	non-TF	1.54603e-08	2.32295	0.947	0.6	0.000314695
HTRA1	non-TF	2.14685e-10	2.29923	0.789	0	4.36991e-06	TRUE	TRUE
UQCR11	non-TF	1.11917e-09	2.29687	1	0.975	2.27808e-05
PRDX2	non-TF	4.78635e-08	2.28069	0.947	0.95	0.000974262
COX8A	non-TF	1.23839e-09	2.28026	1	1	2.52075e-05
C11orf97	non-TF	2.14685e-10	2.26541	0.789	0	4.36991e-06
NDUFB1	non-TF	1.21311e-09	2.24857	0.737	0	2.46928e-05		TRUE
SCG3	non-TF	2.16398e-08	2.247	1	0.775	0.000440479
NDUFC1	non-TF	1.27427e-06	2.23314	0.895	0.925	0.0259378		TRUE
NDUFA13	non-TF	1.20508e-08	2.222	0.789	0.1	0.000245294		TRUE
ATP5MC2	non-TF	3.64136e-08	2.19738	0.947	1	0.0007412
SEM1	non-TF	2.14685e-10	2.18888	0.789	0	4.36991e-06		TRUE
KTN1	non-TF	5.70523e-07	2.17638	0.684	0.1	0.011613
PLCG2	non-TF	1.28835e-08	2.172	0.737	0.05	0.000262245		TRUE
SRRM1	non-TF	6.49499e-09	2.14678	0.684	0	0.000132205
PRDX4	non-TF	1.49223e-06	2.12971	0.737	0.2	0.0303743		TRUE
ATP5IF1	non-TF	2.44575e-06	2.12163	0.895	1	0.0497832
ANAPC13	non-TF	5.73147e-10	2.09561	1	0.65	1.16664e-05
C9orf116	non-TF	3.30204e-08	2.08751	0.632	0	0.000672131
SNU13	non-TF	6.49499e-09	2.07817	0.684	0	0.000132205
ARL6IP5	non-TF	1.76943e-06	2.06898	0.895	0.95	0.0360167
SEC62	non-TF	8.4726e-08	2.06896	0.947	0.65	0.0017246
MRPS21	non-TF	2.09927e-07	2.04016	0.684	0.075	0.00427306
MALAT1	non-TF	1.85176e-09	2.02078	1	1	3.76926e-05		TRUE
ZNF428	non-TF	2.56974e-08	2.01643	0.789	0.125	0.000523072
RSPO3	non-TF	2.42876e-08	2.00527	0.684	0.025	0.000494375		TRUE
PARK7	non-TF	6.01769e-08	1.99844	0.947	0.975	0.0012249
SPCS1	non-TF	8.24795e-10	1.94648	1	0.975	1.67887e-05
HLA-DQB1	non-TF	3.30204e-08	1.91487	0.632	0	0.000672131		TRUE
FAM183A	non-TF	1.07982e-07	1.91201	1	1	0.00219798
C1QBP	non-TF	7.65447e-08	1.9029	0.684	0.05	0.00155807
NACA	non-TF	9.44123e-08	1.90007	0.947	0.975	0.00192176
BTF3	non-TF	1.63208e-06	1.88634	0.895	0.95	0.0332211
CAMK2N1	non-TF	6.48581e-07	1.87916	0.947	0.85	0.0132019
MSRB2	non-TF	2.05608e-08	1.86063	0.895	0.325	0.000418515
ATP5MD	non-TF	2.14685e-10	1.8231	0.789	0	4.36991e-06
ST13	non-TF	1.21667e-06	1.80723	0.947	0.875	0.0247654		TRUE
FRMD4B	non-TF	1.78908e-07	1.80175	0.737	0.125	0.00364167
SEPT11	non-TF	1.21311e-09	1.79353	0.737	0	2.46928e-05	TRUE
ATRAID	non-TF	1.08978e-06	1.78383	0.842	0.375	0.0221825
EDF1	non-TF	6.9786e-07	1.76846	0.895	0.85	0.0142049
PLA2G16	non-TF	6.49499e-09	1.76765	0.684	0	0.000132205
ANAPC16	non-TF	2.04563e-06	1.74494	0.895	0.875	0.0416387
SURF1	non-TF	3.42137e-07	1.72554	0.842	0.25	0.00696419
SEPT7	non-TF	3.30204e-08	1.72097	0.632	0	0.000672131
TMEM219	non-TF	4.61157e-07	1.71897	0.789	0.25	0.00938684
SMIM26	non-TF	1.59761e-07	1.71348	0.579	0	0.00325193
ATP5PB	non-TF	1.59761e-07	1.70963	0.579	0	0.00325193
ELOC	non-TF	7.37272e-07	1.70841	0.526	0	0.0150072
ATP6V0B	non-TF	1.39045e-06	1.70323	0.947	0.95	0.0283025
NDUFB8	non-TF	4.6286e-07	1.7009	0.947	0.85	0.00942151		TRUE
RTN4	non-TF	9.63674e-07	1.69377	0.789	0.2	0.0196156		TRUE
SCAND1	non-TF	1.1414e-06	1.65132	0.684	0.125	0.0232331
ERG28	non-TF	7.37272e-07	1.6206	0.526	0	0.0150072
NBDY	non-TF	3.30204e-08	1.61906	0.632	0	0.000672131
C19orf70	non-TF	3.30204e-08	1.59844	0.632	0	0.000672131
FAM213A	non-TF	7.37272e-07	1.56616	0.526	0	0.0150072
DMAC1	non-TF	7.37272e-07	1.55277	0.526	0	0.0150072
PFDN5	non-TF	6.09102e-07	1.53024	0.947	1	0.0123983
SELENOH	non-TF	7.37272e-07	1.52645	0.526	0	0.0150072
TRIR	non-TF	3.30204e-08	1.52599	0.632	0	0.000672131
DYNLL1	non-TF	1.6378e-06	1.52478	1	1	0.0333373
SELENOS	non-TF	7.37272e-07	1.50897	0.526	0	0.0150072
HSBP1	non-TF	1.83101e-07	1.50272	0.947	0.95	0.00372702
SELENOT	non-TF	1.59761e-07	1.50011	0.579	0	0.00325193
C9orf16	non-TF	6.49499e-09	1.49821	0.684	0	0.000132205
MINOS1	non-TF	1.59761e-07	1.48858	0.579	0	0.00325193
TCTEX1D2	non-TF	1.59761e-07	1.42237	0.579	0	0.00325193
GON7	non-TF	1.59761e-07	1.38087	0.579	0	0.00325193
B3GNT10	non-TF	7.37272e-07	1.37702	0.526	0	0.0150072
C1orf122	non-TF	1.59761e-07	1.3764	0.579	0	0.00325193
NSD3	non-TF	7.37272e-07	1.34362	0.526	0	0.0150072
EIF1	non-TF	8.25712e-08	1.32751	1	1	0.00168074
AFDN	non-TF	7.37272e-07	1.32275	0.526	0	0.0150072
SNHG18	non-TF	7.37272e-07	1.31128	0.526	0	0.0150072
FAM96B	non-TF	1.59761e-07	1.28177	0.579	0	0.00325193
COX6A1	non-TF	6.62361e-07	1.27553	1	1	0.0134824
TPT1	non-TF	7.54685e-08	1.26986	1	1	0.00153616		TRUE
CIRBP	non-TF	1.28339e-06	1.26447	0.947	1	0.0261233
SOD1	non-TF	3.66385e-07	1.21236	1	1	0.00745778		TRUE
RETREG1	non-TF	7.37272e-07	1.13208	0.526	0	0.0150072
MTF1	TF	5.25433e-08	-1.0037	0	0.85	0.00106952		TRUE
PAXIP1	non-TF	6.56971e-08	-1.00603	0.053	0.95	0.00133727
ALKBH1	non-TF	1.03603e-07	-1.00616	0.053	0.925	0.00210883
CHIC1	non-TF	1.08682e-07	-1.00802	0.105	1	0.00221223
SFXN2	non-TF	2.17339e-09	-1.00863	0	0.95	4.42394e-05
MOB3C	non-TF	3.81332e-10	-1.01028	0	1	7.76202e-06
SLC9A9	non-TF	7.89708e-08	-1.01229	0.053	0.95	0.00160745
ADSL	non-TF	2.02922e-07	-1.01405	0.105	1	0.00413048
RFT1	non-TF	4.99645e-09	-1.0172	0	0.925	0.000101703
RAB6A	non-TF	2.02922e-07	-1.02367	0.105	1	0.00413048
SLC35E1	non-TF	8.01633e-09	-1.02723	0.053	1	0.000163172
SYNJ1	non-TF	5.25433e-08	-1.02815	0	0.85	0.00106952
SRF	TF	8.83154e-07	-1.03001	0	0.75	0.0179766
DOT1L	non-TF	2.4553e-08	-1.03406	0	0.875	0.000499777		TRUE
NBEA	non-TF	1.71566e-06	-1.03481	0.053	0.825	0.0349223		TRUE
OSER1	non-TF	2.39485e-06	-1.03538	0.053	0.775	0.0487472
ANAPC2	non-TF	4.50361e-07	-1.03573	0	0.775	0.0091671
EIF2AK2	non-TF	5.56159e-07	-1.03701	0.158	1	0.0113206		TRUE
NEK4	non-TF	1.36061e-07	-1.03812	0.053	0.925	0.00276952		TRUE
MAST3	non-TF	1.69697e-06	-1.04409	0	0.725	0.0345419		TRUE
MREG	non-TF	2.0565e-06	-1.04481	0.158	0.95	0.04186
PHACTR4	non-TF	1.09916e-07	-1.04782	0	0.825	0.00223734
PHTF1	TF	1.44951e-06	-1.04784	0.053	0.825	0.0295048
MAP3K5	non-TF	2.249e-07	-1.05102	0	0.8	0.00457783		TRUE
CRIM1	non-TF	3.28124e-07	-1.0517	0.105	0.95	0.00667897
ATRN	non-TF	8.28398e-08	-1.05171	0.105	1	0.0016862
RAB2B	non-TF	1.93037e-07	-1.05209	0.053	0.9	0.00392926
GARS	non-TF	1.44951e-06	-1.05228	0.053	0.825	0.0295048
UBR1	non-TF	4.59805e-07	-1.05357	0.053	0.875	0.00935934		TRUE
PYGO1	non-TF	4.99645e-09	-1.05591	0	0.925	0.000101703
LRRN1	non-TF	4.50361e-07	-1.0641	0	0.775	0.0091671
RRN3	non-TF	1.36061e-07	-1.06762	0.053	0.925	0.00276952
ZBTB21	TF	2.249e-07	-1.06811	0	0.8	0.00457783
SLC7A1	non-TF	2.17339e-09	-1.06976	0	0.95	4.42394e-05
FTO	non-TF	1.22842e-07	-1.07285	0.053	0.9	0.00250045		TRUE
TRIP12	non-TF	2.27533e-06	-1.07312	0.158	1	0.0463144
EXOC3	non-TF	2.39562e-06	-1.07541	0.053	0.825	0.0487629
LRRC74B	non-TF	2.4553e-08	-1.07646	0	0.875	0.000499777
GNAQ	non-TF	9.22065e-10	-1.07711	0	0.975	1.87686e-05		TRUE
CDK12	non-TF	4.21256e-07	-1.07787	0.053	0.875	0.00857467		TRUE
ADAM10	non-TF	4.99645e-09	-1.07862	0	0.925	0.000101703		TRUE
SEC24C	non-TF	2.30928e-06	-1.07883	0.053	0.8	0.0470055
TET2	TF	2.4553e-08	-1.08203	0	0.875	0.000499777		TRUE
SOD2	non-TF	1.00248e-06	-1.08284	0.158	1	0.0204056		TRUE
NOS1AP	non-TF	5.25433e-08	-1.08346	0	0.85	0.00106952		TRUE
ESCO1	non-TF	1.36061e-07	-1.09306	0.053	0.925	0.00276952
MTMR7	non-TF	8.83154e-07	-1.09648	0	0.75	0.0179766
ZYG11B	non-TF	9.07109e-08	-1.09709	0.105	1	0.00184642
ZNF3	TF	1.43321e-08	-1.09743	0.053	1	0.000291729
NEGR1	non-TF	1.69697e-06	-1.09902	0	0.725	0.0345419
PFAS	non-TF	3.81332e-10	-1.10018	0	1	7.76202e-06
KDM2A	non-TF	8.2335e-07	-1.10133	0.053	0.85	0.0167593		TRUE
EIF4G1	non-TF	2.12407e-06	-1.10217	0.053	0.8	0.0432355		TRUE
RASA1	non-TF	8.83154e-07	-1.10232	0	0.75	0.0179766		TRUE
ZMYM5	non-TF	5.33914e-07	-1.10354	0.105	0.925	0.0108678
WDR90	non-TF	8.83154e-07	-1.1059	0	0.75	0.0179766
WWP2	non-TF	5.25433e-08	-1.10973	0	0.85	0.00106952
TPP2	non-TF	4.50361e-07	-1.11911	0	0.775	0.0091671		TRUE
SMC3	non-TF	1.10424e-06	-1.12088	0.105	0.9	0.0224768
ETFDH	non-TF	1.69697e-06	-1.12131	0	0.725	0.0345419		TRUE
ZNRF3	non-TF	1.75858e-08	-1.12182	0.053	0.95	0.000357959
CEP120	non-TF	8.83154e-07	-1.12306	0	0.75	0.0179766
FAM13A	non-TF	2.249e-07	-1.12369	0	0.8	0.00457783
NF1	non-TF	1.09916e-07	-1.12444	0	0.825	0.00223734		TRUE
DZIP1L	non-TF	2.75786e-07	-1.12525	0.053	0.9	0.00561362
YEATS2	non-TF	9.22065e-10	-1.12731	0	0.975	1.87686e-05
RPGRIP1L	non-TF	5.96362e-08	-1.12918	0.053	0.925	0.00121389
SH3GL2	non-TF	5.74673e-08	-1.12981	0.105	1	0.00116975
USP34	non-TF	1.89559e-06	-1.13156	0.158	0.95	0.0385847
AGPAT4	non-TF	2.37321e-07	-1.13384	0.105	0.975	0.00483067
SNRPB	non-TF	1.06384e-06	-1.13402	0.158	0.95	0.0216545
FBXW9	non-TF	5.25433e-08	-1.13461	0	0.85	0.00106952
SYT13	non-TF	1.5772e-06	-1.13622	0.053	0.825	0.0321039
TBC1D19	non-TF	1.09916e-07	-1.13651	0	0.825	0.00223734
BBS1	non-TF	2.17339e-09	-1.14247	0	0.95	4.42394e-05
PFKL	non-TF	1.12091e-08	-1.14341	0	0.9	0.00022816
NUP133	non-TF	3.81332e-10	-1.15019	0	1	7.76202e-06
PTEN	non-TF	1.27337e-07	-1.15054	0.105	0.975	0.00259194		TRUE
ZNF423	TF	8.83154e-07	-1.15324	0	0.75	0.0179766		TRUE
SLC12A2	non-TF	1.89361e-06	-1.15637	0.105	0.875	0.0385445		TRUE
MAN2A2	non-TF	7.79994e-07	-1.15744	0.158	1	0.0158768
SDE2	non-TF	3.81332e-10	-1.15765	0	1	7.76202e-06
TMEM178B	non-TF	4.99645e-09	-1.1579	0	0.925	0.000101703
STK3	non-TF	2.4553e-08	-1.15879	0	0.875	0.000499777		TRUE
WDR35	non-TF	4.97508e-08	-1.16242	0.053	0.95	0.00101268
MCU	non-TF	8.51545e-08	-1.16348	0.053	0.9	0.00173332
OTUD4	non-TF	4.50361e-07	-1.16869	0	0.775	0.0091671
PSMA6	non-TF	2.02412e-06	-1.16906	0.053	0.775	0.0412009		TRUE
TGS1	non-TF	1.79553e-06	-1.16931	0.053	0.8	0.0365479
CEBPG	TF	1.67539e-06	-1.17699	0.105	0.9	0.0341026
SYPL1	non-TF	1.35784e-06	-1.18024	0.105	0.875	0.0276389
LRBA	non-TF	6.6968e-07	-1.18264	0.053	0.825	0.0136313
ARF6	non-TF	7.12083e-07	-1.18375	0.105	0.95	0.0144945		TRUE
LRRC27	non-TF	1.8446e-06	-1.18467	0.158	0.975	0.0375468
LPIN1	non-TF	7.09493e-07	-1.18587	0.053	0.875	0.0144417		TRUE
SUCLG1	non-TF	9.17564e-07	-1.1875	0.158	0.925	0.018677
JUP	non-TF	2.79253e-07	-1.19146	0.158	1	0.00568419
SEMA6D	non-TF	2.249e-07	-1.19156	0	0.8	0.00457783
EIF5A	non-TF	1.74681e-06	-1.19656	0.158	0.95	0.0355563		TRUE
TTC8	non-TF	4.99645e-09	-1.19893	0	0.925	0.000101703
ABCF3	non-TF	9.46474e-07	-1.19921	0.053	0.825	0.0192655
GPATCH8	non-TF	6.54034e-07	-1.20216	0.105	0.95	0.0133129
TNRC6C	non-TF	5.24122e-08	-1.2065	0.105	1	0.00106685
RAB33B	non-TF	3.81332e-10	-1.20709	0	1	7.76202e-06
TOP2B	non-TF	7.55418e-07	-1.22134	0.053	0.85	0.0153765		TRUE
PDLIM7	non-TF	5.25433e-08	-1.2229	0	0.85	0.00106952
FAM216A	non-TF	1.69697e-06	-1.22352	0	0.725	0.0345419
ARID2	TF	1.95467e-06	-1.22388	0.105	0.85	0.0397872
GABARAP	non-TF	1.80022e-07	-1.2251	0.158	1	0.00366435
NVL	non-TF	6.59095e-09	-1.22681	0.053	1	0.000134159
SPPL2A	non-TF	9.22065e-10	-1.22795	0	0.975	1.87686e-05
LMOD1	non-TF	2.64145e-07	-1.22871	0.105	1	0.00537668
MAST2	non-TF	1.5772e-06	-1.23143	0.053	0.825	0.0321039
DENND4C	non-TF	2.4553e-08	-1.23635	0	0.875	0.000499777
DNAJC27	non-TF	8.83154e-07	-1.23799	0	0.75	0.0179766
TMEM67	non-TF	3.75849e-08	-1.23861	0.053	0.95	0.000765041
CARF	TF	1.09916e-07	-1.23947	0	0.825	0.00223734
CABCOCO1	non-TF	1.17392e-06	-1.24218	0.053	0.8	0.0238951
CUL1	non-TF	9.4555e-08	-1.24368	0.053	0.925	0.00192467
KHNYN	non-TF	4.50361e-07	-1.24485	0	0.775	0.0091671
CEP104	non-TF	2.249e-07	-1.24599	0	0.8	0.00457783
ZNF329	TF	2.17339e-09	-1.24617	0	0.95	4.42394e-05
BBS2	non-TF	2.249e-07	-1.2474	0	0.8	0.00457783
TTBK2	non-TF	3.81332e-10	-1.24759	0	1	7.76202e-06
ZZEF1	non-TF	1.09916e-07	-1.24843	0	0.825	0.00223734
DERA	non-TF	1.69697e-06	-1.2502	0	0.725	0.0345419
NUP98	non-TF	9.22065e-10	-1.2505	0	0.975	1.87686e-05
FYCO1	non-TF	3.81332e-10	-1.2514	0	1	7.76202e-06
PI4K2A	non-TF	1.69697e-06	-1.25221	0	0.725	0.0345419		TRUE
BAZ2A	TF	5.62379e-07	-1.25317	0.053	0.825	0.0114472		TRUE
PI4KB	non-TF	6.543e-08	-1.2593	0.053	0.925	0.00133183		TRUE
TNPO3	non-TF	2.249e-07	-1.261	0	0.8	0.00457783
BBS5	non-TF	8.83154e-07	-1.26359	0	0.75	0.0179766
ZSCAN29	TF	2.5224e-07	-1.26716	0.105	0.95	0.00513434
STARD5	non-TF	2.17339e-09	-1.26919	0	0.95	4.42394e-05
SRCAP	non-TF	9.22065e-10	-1.27154	0	0.975	1.87686e-05
NCOA2	non-TF	1.09916e-07	-1.27194	0	0.825	0.00223734		TRUE
IQCE	non-TF	4.44434e-07	-1.27393	0.158	0.975	0.00904645
KLF4	TF	1.09916e-07	-1.27431	0	0.825	0.00223734		TRUE
SEMA6A	non-TF	1.25638e-06	-1.27506	0.158	0.95	0.0255736
FANCA	non-TF	1.69697e-06	-1.27537	0	0.725	0.0345419		TRUE
ABCA2	non-TF	3.53296e-07	-1.27562	0.053	0.875	0.00719134
SOX9	TF	2.79253e-07	-1.27629	0.158	1	0.00568419
MCC	non-TF	2.17339e-09	-1.27723	0	0.95	4.42394e-05
GBF1	non-TF	1.65015e-06	-1.27731	0.053	0.8	0.0335887
EMB	non-TF	2.249e-07	-1.27811	0	0.8	0.00457783
DECR2	non-TF	1.32499e-09	-1.2794	0.053	1	2.69702e-05
ESPNL	non-TF	4.97508e-08	-1.2803	0.053	0.95	0.00101268
PPP1R15B	non-TF	1.09916e-07	-1.28078	0	0.825	0.00223734
CEP162	non-TF	8.92407e-09	-1.2815	0.053	0.975	0.000181649
PRUNE2	non-TF	6.05468e-07	-1.28548	0.158	1	0.0123243
BSDC1	non-TF	8.83154e-07	-1.28559	0	0.75	0.0179766
TCP11L2	non-TF	4.89832e-07	-1.28592	0.105	0.925	0.00997054
FAM219B	non-TF	9.71322e-08	-1.28681	0.105	0.975	0.00197713
PRR15L	non-TF	1.24867e-06	-1.2882	0.105	0.875	0.0254168
CCAR1	non-TF	1.89559e-06	-1.2895	0.158	0.95	0.0385847
USP42	non-TF	1.12091e-08	-1.28968	0	0.9	0.00022816
CD164	non-TF	2.05641e-06	-1.29149	0.105	0.875	0.0418583
ARID5A	TF	1.69697e-06	-1.29179	0	0.725	0.0345419
ENKUR	non-TF	1.99326e-06	-1.29252	0.316	1	0.0405727
MYO1E	non-TF	6.05468e-07	-1.29554	0.158	1	0.0123243
THG1L	non-TF	4.99645e-09	-1.29681	0	0.925	0.000101703
SEC24B	non-TF	2.70798e-07	-1.29734	0.053	0.875	0.00551209
SIN3A	non-TF	1.65015e-06	-1.29995	0.053	0.8	0.0335887
KDSR	non-TF	2.55911e-07	-1.30121	0.158	1	0.00520907
RNF150	non-TF	3.81332e-10	-1.30125	0	1	7.76202e-06
PEG3	TF	2.17339e-09	-1.30195	0	0.95	4.42394e-05
SFRP1	non-TF	5.25433e-08	-1.30199	0	0.85	0.00106952
CASK	non-TF	1.12091e-08	-1.30227	0	0.9	0.00022816
CELSR1	non-TF	4.99645e-09	-1.30489	0	0.925	0.000101703
DNTTIP2	non-TF	2.5224e-07	-1.30889	0.105	0.95	0.00513434
ARMC2	non-TF	8.83726e-09	-1.30896	0.053	1	0.000179882
CLIP4	non-TF	2.30928e-06	-1.30946	0.053	0.8	0.0470055
AMFR	non-TF	1.22321e-06	-1.30976	0.158	0.975	0.0248985
PRKN	non-TF	5.4133e-09	-1.31229	0.053	1	0.000110188
ATXN1	non-TF	1.76447e-07	-1.31304	0.053	0.9	0.00359159
NCS1	non-TF	2.70798e-07	-1.31306	0.053	0.875	0.00551209
NAPB	non-TF	4.99645e-09	-1.31324	0	0.925	0.000101703
KIAA0100	non-TF	1.12134e-07	-1.31355	0.053	0.9	0.00228249
BIRC6	non-TF	2.43742e-09	-1.31633	0.053	1	4.96137e-05
OTUD7B	non-TF	3.77646e-07	-1.32214	0.105	0.925	0.00768698
GID4	non-TF	4.02136e-09	-1.32231	0.053	1	8.18549e-05
DDX41	non-TF	8.83154e-07	-1.3233	0	0.75	0.0179766
NCEH1	non-TF	2.83261e-08	-1.32476	0.053	0.95	0.000576577
TMEM263	non-TF	7.17676e-08	-1.32509	0.053	0.925	0.00146083
ABHD17B	non-TF	4.50361e-07	-1.32753	0	0.775	0.0091671
PRPF39	non-TF	8.2335e-07	-1.32764	0.053	0.85	0.0167593
TP53BP2	non-TF	1.93168e-08	-1.32817	0.053	0.975	0.000393194
TEKT4	non-TF	2.30928e-06	-1.33384	0.053	0.8	0.0470055
SFR1	non-TF	1.28187e-06	-1.33624	0.158	0.925	0.0260925
SHROOM3	non-TF	9.22065e-10	-1.34034	0	0.975	1.87686e-05
HNRNPL	non-TF	3.81332e-10	-1.34324	0	1	7.76202e-06
SHC1	non-TF	3.11347e-08	-1.3437	0.053	0.95	0.000633747
ZNF276	TF	9.77291e-07	-1.34414	0.053	0.85	0.0198928
ZMYND8	non-TF	2.05724e-08	-1.34464	0.105	1	0.000418751
TMEM69	non-TF	3.81332e-10	-1.34962	0	1	7.76202e-06
GYS1	non-TF	5.25433e-08	-1.35172	0	0.85	0.00106952
SOCS2	non-TF	1.69697e-06	-1.35276	0	0.725	0.0345419
DDIT3	TF	6.09162e-07	-1.35651	0.105	0.9	0.0123995		TRUE
MAPRE1	non-TF	1.8613e-06	-1.3571	0.211	1	0.0378868
PDCD4	non-TF	1.28432e-06	-1.35781	0.263	1	0.0261424		TRUE
SOS2	non-TF	4.53231e-08	-1.35869	0.053	0.95	0.000922552
YPEL2	non-TF	1.09651e-07	-1.35932	0.053	0.875	0.00223195
TACC1	non-TF	3.85835e-07	-1.36022	0.053	0.875	0.00785367
PSMA5	non-TF	1.91968e-08	-1.36222	0.053	0.925	0.00039075		TRUE
KIZ	non-TF	5.62379e-07	-1.36288	0.053	0.825	0.0114472
CCT5	non-TF	1.93105e-06	-1.36786	0.263	1	0.0393066
APBB3	non-TF	3.53296e-07	-1.36788	0.053	0.875	0.00719134
GMPS	non-TF	1.89559e-06	-1.36965	0.158	0.95	0.0385847
ZRANB1	non-TF	2.30855e-07	-1.36978	0.053	0.9	0.00469906
KCNH8	non-TF	9.22065e-10	-1.37121	0	0.975	1.87686e-05		TRUE
DUSP18	non-TF	1.12586e-06	-1.37556	0.158	0.975	0.0229168
IFT46	non-TF	1.50753e-07	-1.37607	0.158	1	0.00306858
PLXNA2	non-TF	2.4553e-08	-1.37646	0	0.875	0.000499777
RIOK3	non-TF	5.74673e-08	-1.37674	0.105	1	0.00116975
SPECC1L	non-TF	1.69697e-06	-1.3776	0	0.725	0.0345419		TRUE
ICA1	non-TF	3.77646e-07	-1.3788	0.105	0.925	0.00768698		TRUE
PPIL6	non-TF	2.41855e-06	-1.37883	0.158	0.95	0.0492297
KIF6	non-TF	2.249e-07	-1.38075	0	0.8	0.00457783		TRUE
YME1L1	non-TF	1.51307e-06	-1.38316	0.263	1	0.0307985
KNCN	non-TF	1.85751e-07	-1.38413	0.105	1	0.00378096
SRGAP3	non-TF	1.52327e-07	-1.38431	0.105	0.975	0.00310061
ZSCAN26	TF	1.74118e-07	-1.38492	0.158	0.95	0.00354417
SCAMP1	non-TF	1.93445e-07	-1.3858	0.105	0.95	0.00393758
SMG7	non-TF	1.02332e-07	-1.38737	0.053	0.9	0.00208297
SCAF8	non-TF	1.09916e-07	-1.38956	0	0.825	0.00223734
TPP1	non-TF	2.4553e-08	-1.39064	0	0.875	0.000499777		TRUE
ECD	non-TF	9.22065e-10	-1.39182	0	0.975	1.87686e-05
BLZF1	TF	5.33844e-07	-1.39332	0.053	0.85	0.0108664
CCDC189	non-TF	5.25433e-08	-1.3952	0	0.85	0.00106952
PLPPR5	non-TF	2.70798e-07	-1.40018	0.053	0.875	0.00551209
NACC2	non-TF	3.81332e-10	-1.40092	0	1	7.76202e-06
CABIN1	non-TF	1.24867e-06	-1.40379	0.105	0.875	0.0254168
TANGO6	non-TF	5.25433e-08	-1.4083	0	0.85	0.00106952
ANKFY1	non-TF	9.22065e-10	-1.41135	0	0.975	1.87686e-05
B4GALT5	non-TF	5.57633e-08	-1.41176	0.158	1	0.00113506
EIF3A	non-TF	1.58158e-06	-1.41326	0.211	1	0.0321931		TRUE
CEP41	non-TF	8.48267e-07	-1.41603	0.158	1	0.0172665
RAB11B	non-TF	4.14129e-07	-1.41872	0.211	1	0.0084296
ASB8	non-TF	8.83154e-07	-1.41994	0	0.75	0.0179766
PLXNB1	non-TF	4.21256e-07	-1.42117	0.053	0.875	0.00857467
CTSA	non-TF	4.11959e-07	-1.42159	0.105	0.925	0.00838542		TRUE
IQCB1	non-TF	1.09916e-07	-1.42986	0	0.825	0.00223734
RBM28	non-TF	3.81332e-10	-1.42999	0	1	7.76202e-06
GMFB	non-TF	2.4553e-08	-1.43206	0	0.875	0.000499777
POFUT2	non-TF	3.81332e-10	-1.43969	0	1	7.76202e-06
MGA	TF	4.99645e-09	-1.44006	0	0.925	0.000101703		TRUE
ZFAND5	non-TF	5.12723e-07	-1.44069	0.105	0.9	0.0104365
OSTF1	non-TF	3.81332e-10	-1.44075	0	1	7.76202e-06
GSTM2	non-TF	1.69697e-06	-1.44167	0	0.725	0.0345419
LRRC34	non-TF	7.30478e-07	-1.44351	0.053	0.825	0.0148689
NUP35	non-TF	1.02332e-07	-1.44367	0.053	0.9	0.00208297
ARHGEF12	non-TF	2.17339e-09	-1.44424	0	0.95	4.42394e-05
CEP152	non-TF	2.249e-07	-1.44482	0	0.8	0.00457783
FAM32A	non-TF	3.32258e-07	-1.44603	0.158	1	0.00676311
UBE2G2	non-TF	1.41919e-06	-1.44697	0.105	0.9	0.0288877
RAB11A	non-TF	1.81755e-06	-1.44799	0.474	1	0.0369963
POU3F2	TF	3.81332e-10	-1.45039	0	1	7.76202e-06
STXBP4	non-TF	3.81332e-10	-1.45171	0	1	7.76202e-06
OXCT1	non-TF	1.27876e-06	-1.45182	0.053	0.8	0.0260292
IFT80	non-TF	3.75616e-07	-1.45199	0.053	0.85	0.00764567
AKAP6	non-TF	6.92902e-07	-1.45234	0.053	0.85	0.014104
IGF1R	non-TF	3.17103e-07	-1.45363	0.105	0.925	0.00645463		TRUE
PDS5A	non-TF	2.17339e-09	-1.45422	0	0.95	4.42394e-05
CLIC5	non-TF	8.0984e-08	-1.45647	0.105	0.975	0.00164843
CAPN2	non-TF	2.95979e-07	-1.45754	0.053	0.875	0.00602465		TRUE
BTAF1	non-TF	4.99645e-09	-1.45883	0	0.925	0.000101703
TP53INP2	non-TF	4.50361e-07	-1.45966	0	0.775	0.0091671
CBX3	non-TF	1.67631e-06	-1.46122	0.474	1	0.0341213
UHRF1BP1L	non-TF	1.12091e-08	-1.46369	0	0.9	0.00022816
LYRM4	non-TF	1.18915e-07	-1.46614	0.158	0.975	0.00242052
HNRNPH2	non-TF	1.03127e-06	-1.46876	0.053	0.825	0.0209914		TRUE
TUBA1A	non-TF	1.83402e-07	-1.46921	0.947	1	0.00373316		TRUE
HSPA4	non-TF	2.07058e-07	-1.46929	0.053	0.875	0.00421467		TRUE
DUSP10	non-TF	2.249e-07	-1.47109	0	0.8	0.00457783
CARS	non-TF	7.7648e-08	-1.4748	0.053	0.9	0.00158052
IFT172	non-TF	4.12786e-08	-1.47804	0.053	0.95	0.000840225
DNAJC5	non-TF	2.249e-07	-1.47903	0	0.8	0.00457783
ALG11	non-TF	1.34536e-07	-1.48209	0.053	0.9	0.00273849
EEF1A1	non-TF	7.54356e-08	-1.48772	0.895	1	0.00153549		TRUE
EFR3A	non-TF	2.55911e-07	-1.49341	0.158	1	0.00520907
ZNF317	TF	9.22065e-10	-1.49521	0	0.975	1.87686e-05
CABP2	non-TF	3.32049e-08	-1.49821	1	1	0.000675885
TOM1L2	non-TF	7.51654e-07	-1.50294	0.105	0.925	0.0152999
MYO1H	non-TF	9.22065e-10	-1.50352	0	0.975	1.87686e-05		TRUE
EPM2AIP1	non-TF	2.36891e-06	-1.50372	0.211	0.975	0.0482191
TOB2	non-TF	6.02716e-09	-1.50623	0.053	0.975	0.000122683
CFAP69	non-TF	1.6476e-07	-1.50838	0.158	1	0.0033537
CRY2	non-TF	1.61863e-07	-1.50996	0.105	0.95	0.00329473
UBXN2A	non-TF	4.44138e-09	-1.5144	0.053	1	9.04042e-05
AAR2	non-TF	1.69697e-06	-1.51553	0	0.725	0.0345419
DNAJA1	non-TF	1.61787e-06	-1.51809	0.684	1	0.0329318
DLD	non-TF	2.83261e-08	-1.51812	0.053	0.95	0.000576577
GTPBP1	non-TF	5.62379e-07	-1.51933	0.053	0.825	0.0114472
ZBTB11	TF	2.17339e-09	-1.52052	0	0.95	4.42394e-05
CYP51A1	non-TF	5.96362e-08	-1.52117	0.053	0.925	0.00121389		TRUE
ARHGAP5	non-TF	1.95467e-06	-1.52516	0.105	0.85	0.0397872
VPS13B	non-TF	1.09916e-07	-1.52557	0	0.825	0.00223734
POLR1C	non-TF	4.99645e-09	-1.52658	0	0.925	0.000101703
LYST	non-TF	5.58941e-07	-1.52667	0.105	0.9	0.0113772
STT3A	non-TF	5.25433e-08	-1.52797	0	0.85	0.00106952
WBP1	non-TF	1.09916e-07	-1.53323	0	0.825	0.00223734
NAV1	non-TF	7.26975e-09	-1.53428	0.053	1	0.000147976
GNL3L	non-TF	4.50361e-07	-1.53526	0	0.775	0.0091671
ZSWIM6	non-TF	2.17339e-09	-1.5358	0	0.95	4.42394e-05
CNNM4	non-TF	3.81332e-10	-1.53658	0	1	7.76202e-06
CALM2	non-TF	2.26089e-09	-1.53744	0.947	1	4.60204e-05
CTSD	non-TF	1.93105e-06	-1.5381	0.263	1	0.0393066		TRUE
PFKFB2	non-TF	3.81332e-10	-1.54118	0	1	7.76202e-06
VCP	non-TF	4.9142e-07	-1.54501	0.211	1	0.0100029		TRUE
HDAC3	non-TF	1.61863e-07	-1.54802	0.105	0.95	0.00329473		TRUE
CDK14	non-TF	5.5131e-07	-1.55094	0.158	0.925	0.0112219		TRUE
ME1	non-TF	9.22065e-10	-1.55323	0	0.975	1.87686e-05
NT5DC3	non-TF	9.22065e-10	-1.55385	0	0.975	1.87686e-05
TMEM231	non-TF	1.12091e-08	-1.55699	0	0.9	0.00022816
PDE5A	non-TF	8.83726e-09	-1.5585	0.053	1	0.000179882		TRUE
DRC7	non-TF	2.30561e-06	-1.55993	0.105	0.85	0.0469306
SLC7A14	non-TF	3.81332e-10	-1.56184	0	1	7.76202e-06
MICU3	non-TF	1.19589e-09	-1.56398	0.053	1	2.43423e-05
CCDC93	non-TF	1.75858e-08	-1.56501	0.053	0.95	0.000357959
TTC24	non-TF	8.60204e-08	-1.56559	0.105	0.95	0.00175094
ZMAT3	non-TF	8.83726e-09	-1.56664	0.053	1	0.000179882
DDO	non-TF	2.249e-07	-1.56724	0	0.8	0.00457783		TRUE
ENO4	non-TF	1.12091e-08	-1.5691	0	0.9	0.00022816
CASZ1	TF	8.92407e-09	-1.56979	0.053	0.975	0.000181649
CMTM4	non-TF	8.83154e-07	-1.57044	0	0.75	0.0179766
CERS6	non-TF	2.17339e-09	-1.58235	0	0.95	4.42394e-05		TRUE
KMT2D	non-TF	9.73969e-09	-1.58395	0.053	1	0.000198251		TRUE
AKAP8L	non-TF	2.17339e-09	-1.58478	0	0.95	4.42394e-05
ARFGEF3	non-TF	4.99645e-09	-1.5848	0	0.925	0.000101703
IDH3A	non-TF	8.18215e-07	-1.59204	0.105	0.925	0.0166548
SUPT6H	non-TF	1.45058e-08	-1.59391	0.053	0.95	0.000295266
NUP153	non-TF	6.543e-08	-1.59684	0.053	0.925	0.00133183
DMXL2	non-TF	1.12091e-08	-1.5977	0	0.9	0.00022816
NEMF	non-TF	6.09162e-07	-1.60206	0.105	0.9	0.0123995
PSMA3	non-TF	8.87204e-07	-1.60353	0.263	0.975	0.018059		TRUE
NUMA1	non-TF	1.89361e-06	-1.61206	0.105	0.875	0.0385445		TRUE
DALRD3	non-TF	9.17564e-07	-1.61367	0.158	0.925	0.018677
IFNAR1	non-TF	2.33487e-09	-1.62045	0.158	1	4.75262e-05		TRUE
WDR26	non-TF	2.69556e-09	-1.62661	0.053	1	5.48681e-05
KLHL24	non-TF	5.97396e-09	-1.62903	0.053	1	0.0001216
DYNC2H1	non-TF	1.27337e-07	-1.62919	0.105	0.975	0.00259194		TRUE
STK11IP	non-TF	3.81332e-10	-1.63318	0	1	7.76202e-06
TMEM117	non-TF	1.05245e-08	-1.64099	0.105	1	0.000214227
ODC1	non-TF	1.9702e-06	-1.64279	0.474	1	0.0401033		TRUE
DNAJB13	non-TF	1.47304e-07	-1.64359	0.053	0.9	0.00299838
DNAJC18	non-TF	1.36481e-06	-1.64505	0.158	0.95	0.0277807
SNAP25	non-TF	8.57125e-07	-1.64655	0.105	0.9	0.0174468		TRUE
TBCK	non-TF	5.46025e-09	-1.64738	0.053	0.975	0.000111143
USP20	non-TF	1.19525e-08	-1.6479	0.053	0.95	0.000243293
ATP10D	non-TF	1.05511e-06	-1.6513	0.105	0.875	0.0214768
CREBBP	non-TF	4.99645e-09	-1.65187	0	0.925	0.000101703		TRUE
STIP1	non-TF	3.61692e-08	-1.6534	0.105	1	0.000736224
TIRAP	non-TF	1.12091e-08	-1.65463	0	0.9	0.00022816		TRUE
PDE4DIP	non-TF	1.03127e-06	-1.65519	0.053	0.825	0.0209914
GPI	non-TF	6.15314e-08	-1.65529	0.105	0.975	0.00125247		TRUE
NAPA	non-TF	2.25674e-07	-1.65685	0.211	1	0.00459359
TAF1	non-TF	3.81332e-10	-1.65857	0	1	7.76202e-06		TRUE
GHITM	non-TF	1.75412e-06	-1.66032	0.684	1	0.0357051
TTC34	non-TF	1.6124e-07	-1.66366	0.053	0.9	0.00328205
PHF20	non-TF	4.47229e-07	-1.66413	0.316	1	0.00910334
WDFY1	non-TF	2.20342e-09	-1.66516	0.053	1	4.48507e-05
ARL6	non-TF	9.22065e-10	-1.66906	0	0.975	1.87686e-05
CYB5D1	non-TF	1.31574e-08	-1.66927	0.053	0.975	0.000267819
YARS	non-TF	2.4553e-08	-1.67234	0	0.875	0.000499777
SBNO1	non-TF	9.32895e-07	-1.67376	0.105	0.9	0.0189891
ATP5F1B	non-TF	9.44753e-07	-1.6747	0.474	1	0.0192304
COPB2	non-TF	7.50927e-07	-1.67553	0.105	0.875	0.0152851
RSRP1	non-TF	2.65017e-09	-1.68219	0.105	1	5.39443e-05
SYN3	non-TF	3.81332e-10	-1.68226	0	1	7.76202e-06
DUSP14	non-TF	2.91682e-07	-1.68644	0.211	0.975	0.00593718
IARS	non-TF	7.85093e-08	-1.68875	0.105	0.95	0.00159806
RUNX1T1	non-TF	4.95024e-08	-1.69088	0.053	0.925	0.00100762
PADI2	non-TF	1.45137e-07	-1.69208	0.211	1	0.00295427		TRUE
EPB41	non-TF	2.47692e-07	-1.69677	0.053	0.875	0.00504177		TRUE
RHPN1	non-TF	5.80229e-07	-1.69715	0.105	0.875	0.0118106
CFAP44	non-TF	5.82533e-07	-1.6975	0.211	1	0.0118575		TRUE
PRRC2C	non-TF	5.30189e-07	-1.69777	0.316	1	0.010792
TMEM255B	non-TF	8.40881e-08	-1.69835	0.474	1	0.00171161
CNOT10	non-TF	4.87514e-08	-1.70271	0.053	0.9	0.000992335
RAPH1	non-TF	1.12091e-08	-1.70317	0	0.9	0.00022816
KMT2C	TF	5.1167e-08	-1.70461	0.105	0.975	0.00104151		TRUE
IPO13	non-TF	6.25437e-07	-1.7047	0.211	0.95	0.0127308		TRUE
HERC1	non-TF	1.19451e-08	-1.70571	0.053	0.975	0.000243143
DNMT3A	non-TF	1.12091e-08	-1.70672	0	0.9	0.00022816		TRUE
KDM5B	non-TF	9.83756e-09	-1.70912	0.053	0.975	0.000200244		TRUE
SPIN1	non-TF	4.99645e-09	-1.71115	0	0.925	0.000101703
LIN7C	non-TF	3.66823e-09	-1.71129	0.053	0.975	7.46669e-05
ATF6	TF	1.93552e-08	-1.71279	0.053	0.95	0.000393976
NEK7	non-TF	5.25433e-08	-1.71326	0	0.85	0.00106952		TRUE
ASH1L	non-TF	5.32979e-07	-1.71505	0.211	0.975	0.0108488
GPR156	non-TF	1.02332e-07	-1.7155	0.053	0.9	0.00208297
SLC25A4	non-TF	1.06382e-07	-1.71647	0.684	1	0.00216541		TRUE
PHLPP1	non-TF	2.34274e-08	-1.71773	0.053	0.95	0.000476864
EDARADD	non-TF	1.35784e-06	-1.71831	0.105	0.875	0.0276389
MTMR11	non-TF	9.07109e-08	-1.72139	0.105	1	0.00184642
ZMIZ1	TF	1.08697e-07	-1.72333	0.105	0.925	0.00221252
C1orf158	non-TF	8.16033e-07	-1.72377	0.263	0.975	0.0166103
TXLNA	non-TF	2.4553e-08	-1.72958	0	0.875	0.000499777
TRIOBP	non-TF	1.70094e-08	-1.73632	0.105	1	0.000346226
KIAA1024L	non-TF	1.35294e-07	-1.73747	0.158	0.925	0.00275392
USP9X	non-TF	4.63816e-08	-1.73983	0.158	1	0.000944097
RIMKLB	non-TF	4.25037e-08	-1.74009	0.105	0.975	0.000865163
UBXN11	non-TF	1.88157e-07	-1.74011	0.211	0.975	0.00382994
WDR1	non-TF	2.43742e-09	-1.74019	0.053	1	4.96137e-05
EIF4B	non-TF	2.5224e-07	-1.74105	0.105	0.95	0.00513434
IFT74	non-TF	7.21083e-07	-1.74909	0.421	1	0.0146776
POLB	non-TF	2.05724e-08	-1.75266	0.105	1	0.000418751		TRUE
WDFY3	non-TF	4.99645e-09	-1.75492	0	0.925	0.000101703
VEPH1	non-TF	2.46311e-07	-1.75949	0.211	1	0.00501366
CHAC1	non-TF	2.4553e-08	-1.76022	0	0.875	0.000499777
KDM5A	non-TF	3.33496e-07	-1.76343	0.263	1	0.00678832		TRUE
ACTR2	non-TF	7.63417e-09	-1.76441	0.105	0.975	0.000155394		TRUE
MIB1	non-TF	5.43408e-08	-1.7689	0.053	0.925	0.00110611
RAB3GAP1	non-TF	2.4553e-08	-1.77663	0	0.875	0.000499777
DENND4A	non-TF	9.22065e-10	-1.77731	0	0.975	1.87686e-05
ANKHD1	non-TF	1.12091e-08	-1.77881	0	0.9	0.00022816
MAN1A2	non-TF	3.6207e-07	-1.78131	0.105	0.9	0.00736994
CFAP161	non-TF	5.25433e-08	-1.78967	0	0.85	0.00106952
SERINC1	non-TF	1.3647e-06	-1.79299	0.368	1	0.0277785
KDM7A	non-TF	4.44138e-09	-1.8021	0.053	1	9.04042e-05		TRUE
TTC3	non-TF	1.06645e-06	-1.80458	0.368	1	0.0217076
SAMD9L	non-TF	8.83154e-07	-1.80778	0	0.75	0.0179766
CCDC33	non-TF	4.44434e-07	-1.80783	0.158	0.975	0.00904645
ATP2B2	non-TF	2.70798e-07	-1.81429	0.053	0.875	0.00551209
OSBPL11	non-TF	2.19877e-07	-1.81613	0.053	0.85	0.0044756
LARP4B	non-TF	5.25433e-08	-1.81795	0	0.85	0.00106952
ASXL2	non-TF	3.39988e-08	-1.82095	0.053	0.925	0.000692045
STK36	non-TF	1.09916e-07	-1.8278	0	0.825	0.00223734		TRUE
INTS7	non-TF	1.09916e-07	-1.83008	0	0.825	0.00223734
ATRX	non-TF	5.46324e-07	-1.8316	0.368	1	0.0111204		TRUE
BHLHE41	TF	3.81332e-10	-1.83609	0	1	7.76202e-06
GOLT1B	non-TF	1.12134e-07	-1.84113	0.053	0.9	0.00228249
JMJD1C	non-TF	4.89383e-07	-1.84259	0.211	0.975	0.00996139
MIER3	TF	2.34274e-08	-1.84397	0.053	0.95	0.000476864
TSN	non-TF	1.02137e-06	-1.84481	0.053	0.775	0.02079
CCDC157	non-TF	1.26111e-07	-1.84755	0.158	1	0.002567
AP3D1	non-TF	4.11099e-08	-1.85033	0.105	0.95	0.000836791
POR	non-TF	3.00205e-07	-1.85322	0.368	1	0.00611068		TRUE
NXF1	non-TF	4.99645e-09	-1.8544	0	0.925	0.000101703
WIPF2	non-TF	3.81332e-10	-1.85464	0	1	7.76202e-06
SYT11	non-TF	5.4133e-09	-1.85763	0.053	1	0.000110188
C2CD3	non-TF	2.4553e-08	-1.85842	0	0.875	0.000499777
ALDH1A3	non-TF	2.249e-07	-1.86018	0	0.8	0.00457783
WDR6	non-TF	1.34536e-07	-1.8617	0.053	0.9	0.00273849
DUSP3	non-TF	3.81332e-10	-1.86455	0	1	7.76202e-06		TRUE
HMG20A	TF	7.86979e-08	-1.86681	0.053	0.925	0.0016019
KARS	non-TF	7.7648e-08	-1.86739	0.053	0.9	0.00158052
ARAF	non-TF	1.08454e-08	-1.87506	0.053	0.95	0.000220757		TRUE
RAVER2	non-TF	6.45096e-08	-1.87514	0.053	0.9	0.00131309
DRC1	non-TF	6.59883e-07	-1.87887	0.263	1	0.0134319
VCL	non-TF	2.07906e-07	-1.88113	0.158	0.95	0.00423193
TMTC4	non-TF	8.83154e-07	-1.88171	0	0.75	0.0179766
TRRAP	non-TF	2.4553e-08	-1.8834	0	0.875	0.000499777
ACO2	non-TF	2.4553e-08	-1.88537	0	0.875	0.000499777
PPP1R32	non-TF	4.49236e-07	-1.89353	0.211	0.975	0.00914419
SDHA	non-TF	1.13841e-06	-1.89955	0.263	0.975	0.0231723
PLEKHM3	non-TF	1.12091e-08	-1.89992	0	0.9	0.00022816
PMVK	non-TF	1.81773e-08	-1.90191	0.158	1	0.00037		TRUE
NCALD	non-TF	4.50361e-07	-1.90837	0	0.775	0.0091671
MLF1	non-TF	9.82603e-08	-1.90915	0.421	1	0.00200009
ACTR10	non-TF	5.01924e-07	-1.91805	0.368	1	0.0102167
RASAL2	non-TF	2.98025e-09	-1.91953	0.053	1	6.06629e-05
NBAS	non-TF	1.55523e-07	-1.92079	0.158	0.975	0.00316567
PIAS1	TF	6.65117e-09	-1.92128	0.053	0.975	0.000135385
BTG1	non-TF	7.68421e-08	-1.92459	0.474	1	0.00156412
TOM1	non-TF	2.17339e-09	-1.93163	0	0.95	4.42394e-05
UNC119B	non-TF	2.17339e-09	-1.93419	0	0.95	4.42394e-05
ULK2	non-TF	5.4133e-09	-1.93835	0.053	1	0.000110188
ABL2	non-TF	2.4553e-08	-1.94687	0	0.875	0.000499777		TRUE
SIDT2	non-TF	6.13773e-07	-1.94935	0.053	0.825	0.0124934
ASB1	non-TF	3.81332e-10	-1.95389	0	1	7.76202e-06
TNFAIP1	non-TF	1.22842e-07	-1.96088	0.053	0.9	0.00250045		TRUE
HSP90AB1	non-TF	1.01117e-09	-1.96125	1	1	2.05824e-05		TRUE
ZNF512B	TF	5.25433e-08	-1.96744	0	0.85	0.00106952
NUFIP2	non-TF	9.55354e-09	-1.96893	0.105	1	0.000194462
GNA11	non-TF	3.81332e-10	-1.97473	0	1	7.76202e-06		TRUE
FRYL	non-TF	1.54603e-08	-1.98134	0.105	1	0.000314695
REV3L	non-TF	5.95926e-08	-1.98166	0.105	0.95	0.00121301		TRUE
TOMM34	non-TF	2.17339e-09	-1.98946	0	0.95	4.42394e-05
ST8SIA2	non-TF	9.98927e-07	-1.99021	0.105	0.85	0.0203332
PHIP	non-TF	1.27626e-08	-1.99564	0.105	1	0.000259783
GDPD1	non-TF	7.33205e-09	-1.99775	0.053	0.95	0.000149244
TUFT1	non-TF	9.22065e-10	-2.00176	0	0.975	1.87686e-05
CLTC	non-TF	7.75081e-07	-2.00504	0.158	0.925	0.0157768
TTC21A	non-TF	8.03515e-08	-2.01081	0.158	1	0.00163556
C1orf43	non-TF	5.11878e-07	-2.01197	0.368	0.95	0.0104193
HCFC1	non-TF	1.00024e-07	-2.01341	0.053	0.875	0.00203598
SLC1A4	non-TF	1.19525e-08	-2.01724	0.053	0.95	0.000243293
ATF4	TF	3.23747e-09	-2.01793	0.105	1	6.58987e-05		TRUE
MAST4	non-TF	1.12091e-08	-2.02585	0	0.9	0.00022816
RNF182	non-TF	5.35365e-08	-2.03062	0.053	0.9	0.00108974
ZNF263	TF	7.96576e-07	-2.03067	0.053	0.825	0.0162143
RNF128	non-TF	5.46025e-09	-2.03868	0.053	0.975	0.000111143
PRNP	non-TF	1.70094e-08	-2.04008	0.105	1	0.000346226		TRUE
SDC4	non-TF	1.62898e-07	-2.0407	0.368	1	0.00331579
RCN1	non-TF	1.32499e-09	-2.04446	0.053	1	2.69702e-05
CFAP46	non-TF	3.88624e-07	-2.06564	0.368	1	0.00791045
EEF1G	non-TF	1.81007e-09	-2.06902	0.053	0.975	3.6844e-05
PCDH7	non-TF	4.50361e-07	-2.0708	0	0.775	0.0091671
RRP1	non-TF	9.22065e-10	-2.07258	0	0.975	1.87686e-05
COPG1	non-TF	4.99645e-09	-2.07292	0	0.925	0.000101703
MCOLN3	non-TF	1.5928e-07	-2.07336	0.158	0.95	0.00324214		TRUE
DNAH9	non-TF	6.90331e-08	-2.0834	0.158	0.975	0.00140517
ARL8B	non-TF	1.12091e-08	-2.08466	0	0.9	0.00022816
ADGRG6	non-TF	4.99645e-09	-2.08701	0	0.925	0.000101703
IGFBP5	non-TF	2.17339e-09	-2.09014	0	0.95	4.42394e-05		TRUE
NBR1	non-TF	2.4553e-08	-2.09037	0	0.875	0.000499777
HSPA4L	non-TF	1.18915e-07	-2.09531	0.158	0.975	0.00242052
UBN2	non-TF	3.8538e-08	-2.09909	0.158	1	0.000784442
TTLL3	non-TF	2.4539e-09	-2.10122	0.053	0.975	4.99492e-05
HACD3	non-TF	5.21458e-08	-2.10535	0.421	1	0.00106143
CCT7	non-TF	3.61017e-08	-2.11618	0.421	1	0.00073485
ARHGEF28	non-TF	2.55782e-08	-2.11921	0.053	0.925	0.000520644		TRUE
CEP85	non-TF	2.4553e-08	-2.12048	0	0.875	0.000499777
NEFM	non-TF	1.25733e-06	-2.1216	0.368	1	0.025593
VWA3A	non-TF	1.69697e-06	-2.12585	0	0.725	0.0345419
NISCH	non-TF	3.75849e-08	-2.12707	0.053	0.95	0.000765041
NREP	non-TF	2.249e-07	-2.13559	0	0.8	0.00457783
CYFIP2	non-TF	2.44959e-07	-2.1453	0.211	0.975	0.00498613
PTP4A1	non-TF	3.10316e-08	-2.14576	0.105	0.95	0.000631649		TRUE
KIAA1549	TF	8.66985e-09	-2.15164	0.105	1	0.000176475
DOCK10	non-TF	3.81332e-10	-2.15641	0	1	7.76202e-06		TRUE
SIX4	TF	3.81332e-10	-2.1565	0	1	7.76202e-06
ZNF667	TF	2.17339e-09	-2.16273	0	0.95	4.42394e-05
NKTR	non-TF	2.02922e-07	-2.178	0.211	0.95	0.00413048
FGF10	non-TF	9.22065e-10	-2.18173	0	0.975	1.87686e-05
CCDC81	non-TF	1.19429e-07	-2.18391	0.421	0.975	0.00243099
NFIA	TF	2.32642e-08	-2.18482	0.474	1	0.000473543
XIRP2	non-TF	5.8679e-08	-2.18858	0.316	1	0.00119441		TRUE
CFAP52	non-TF	1.84376e-08	-2.19161	0.263	1	0.000375298
RAB18	non-TF	4.03688e-08	-2.19837	0.211	0.975	0.000821707
USP22	non-TF	4.00543e-07	-2.1989	0.211	0.925	0.00815304
TAOK1	non-TF	2.33684e-08	-2.19961	0.105	0.95	0.000475663		TRUE
MKRN2OS	non-TF	9.73426e-10	-2.20069	0.053	1	1.98141e-05
NR1D1	TF	2.00911e-07	-2.20335	0.053	0.85	0.00408955		TRUE
PSME4	non-TF	8.92407e-09	-2.21188	0.053	0.975	0.000181649		TRUE
ETNK1	non-TF	3.56674e-07	-2.21468	0.368	1	0.00726009
TEKT1	non-TF	2.02648e-08	-2.22255	0.263	1	0.000412491
KLF6	TF	9.70852e-08	-2.23187	0.263	1	0.00197617
DNAH11	non-TF	8.92407e-09	-2.23407	0.053	0.975	0.000181649
AARS	non-TF	1.74361e-08	-2.23703	0.053	0.925	0.000354911
EFNA5	non-TF	2.17339e-09	-2.23737	0	0.95	4.42394e-05
LMNA	non-TF	1.81007e-09	-2.23957	0.053	0.975	3.6844e-05		TRUE
ERCC6	non-TF	9.22065e-10	-2.24634	0	0.975	1.87686e-05		TRUE
STAT3	TF	1.90289e-07	-2.24987	0.158	0.95	0.00387332		TRUE
MAP3K1	non-TF	8.83726e-09	-2.25357	0.053	1	0.000179882		TRUE
CCDC65	non-TF	7.1345e-09	-2.25395	0.105	1	0.000145223
CFAP20	non-TF	1.07458e-07	-2.25521	0.421	1	0.00218731
PLPPR4	non-TF	3.81332e-10	-2.25545	0	1	7.76202e-06
SH2D4B	non-TF	3.63522e-07	-2.25683	0.263	1	0.00739948
ATP6V1B2	non-TF	1.23644e-07	-2.26168	0.158	0.925	0.00251678		TRUE
UBE2H	non-TF	2.66083e-08	-2.26185	0.105	0.975	0.000541612
MPRIP	non-TF	9.22065e-10	-2.26934	0	0.975	1.87686e-05
MYSM1	TF	2.39683e-09	-2.2758	0.105	1	4.87875e-05
DNAH5	non-TF	1.88157e-07	-2.29487	0.211	0.975	0.00382994
NMT2	non-TF	1.84058e-06	-2.29548	0.105	0.825	0.037465
NEDD4	non-TF	1.08454e-08	-2.30349	0.053	0.95	0.000220757		TRUE
KLF13	TF	2.92952e-09	-2.30635	0.105	1	5.96304e-05
PEAK1	non-TF	9.22065e-10	-2.32019	0	0.975	1.87686e-05
DENND5B	non-TF	3.81332e-10	-2.33743	0	1	7.76202e-06
CREBRF	TF	3.81332e-10	-2.34674	0	1	7.76202e-06
CACNA1D	non-TF	2.98025e-09	-2.35073	0.053	1	6.06629e-05		TRUE
SREK1	non-TF	8.16033e-07	-2.35414	0.316	0.95	0.0166103
LUC7L	non-TF	9.22065e-10	-2.35716	0	0.975	1.87686e-05
ZNF253	TF	4.22819e-10	-2.36833	0.053	1	8.60649e-06
PURB	TF	4.25037e-08	-2.37264	0.105	0.975	0.000865163
ORMDL3	non-TF	1.02239e-08	-2.37383	0.105	0.975	0.000208107
TRAF3IP1	non-TF	2.17339e-09	-2.39899	0	0.95	4.42394e-05
LRRC58	non-TF	1.19589e-09	-2.40133	0.053	1	2.43423e-05
CHRNA9	non-TF	1.75237e-08	-2.40193	0.211	1	0.000356695		TRUE
PTP4A2	non-TF	2.55621e-08	-2.40311	0.211	1	0.000520316
ANKRD24	non-TF	1.46764e-09	-2.40379	0.053	1	2.98738e-05
MED1	non-TF	2.17339e-09	-2.40817	0	0.95	4.42394e-05
DNAH6	non-TF	1.65282e-08	-2.41392	0.158	1	0.000336431
NSD1	non-TF	2.5305e-08	-2.4197	0.211	0.975	0.000515082
CGN	non-TF	1.81007e-09	-2.43933	0.053	0.975	3.6844e-05
HBP1	TF	2.32509e-08	-2.44344	0.053	0.925	0.000473271
ATF3	TF	1.12091e-08	-2.45463	0	0.9	0.00022816		TRUE
UBR4	non-TF	8.43156e-09	-2.45655	0.158	1	0.000171624
HEYL	TF	9.22065e-10	-2.46376	0	0.975	1.87686e-05
BAZ2B	TF	1.30442e-09	-2.46785	0.105	1	2.65514e-05		TRUE
TRIB2	non-TF	5.21191e-08	-2.47255	0.105	0.925	0.00106088		TRUE
LZTFL1	non-TF	5.35365e-08	-2.48394	0.053	0.9	0.00108974
EPB41L5	non-TF	3.81332e-10	-2.4844	0	1	7.76202e-06
CPE	non-TF	1.56987e-08	-2.4911	0.842	1	0.000319548
EEF2	non-TF	8.70988e-08	-2.49986	0.579	1	0.0017729		TRUE
SEC61A1	non-TF	2.33684e-08	-2.5317	0.105	0.95	0.000475663
LGMN	non-TF	3.71228e-09	-2.54533	0.211	1	7.55635e-05		TRUE
CALML4	non-TF	3.81332e-10	-2.57661	0	1	7.76202e-06
INAFM2	non-TF	8.31424e-07	-2.57738	0.053	0.8	0.0169236
HSPA2	non-TF	1.03185e-07	-2.58171	0.158	0.925	0.00210033
TMF1	TF	3.18929e-09	-2.58882	0.368	1	6.49181e-05
CHRNA10	non-TF	9.86909e-09	-2.59646	0.211	1	0.000200885		TRUE
RFX2	TF	4.99645e-09	-2.60216	0	0.925	0.000101703
ACTB	non-TF	1.56889e-09	-2.63093	0.526	1	3.19347e-05		TRUE
AFAP1	non-TF	3.57684e-09	-2.63583	0.105	1	7.28066e-05
ALDOA	non-TF	9.22065e-10	-2.64479	0	0.975	1.87686e-05
OTOF	non-TF	1.11917e-09	-2.65817	0.947	1	2.27808e-05
BRIP1	non-TF	1.24059e-08	-2.65916	0.158	1	0.000252522
LHFPL5	non-TF	1.07908e-09	-2.66764	0.053	1	2.19647e-05
SLC17A8	non-TF	5.21191e-08	-2.67182	0.105	0.925	0.00106088
BACE1	non-TF	2.17339e-09	-2.6745	0	0.95	4.42394e-05		TRUE
ACTG1	non-TF	7.42938e-10	-2.68084	0.842	1	1.51225e-05		TRUE
CLK1	non-TF	1.88328e-08	-2.74866	0.053	0.9	0.000383343		TRUE
KLHL9	non-TF	5.21653e-10	-2.74884	0.053	1	1.06182e-05
HDAC4	non-TF	3.81332e-10	-2.75901	0	1	7.76202e-06		TRUE
USH2A	non-TF	2.33487e-09	-2.76609	0.158	1	4.75262e-05
ADO	non-TF	3.81332e-10	-2.80158	0	1	7.76202e-06		TRUE
PPM1H	non-TF	3.81332e-10	-2.80274	0	1	7.76202e-06
DTNA	non-TF	8.43156e-09	-2.82275	0.158	1	0.000171624
PLS1	non-TF	1.56889e-09	-2.82512	0.526	1	3.19347e-05
CCDC6	non-TF	3.81332e-10	-2.8404	0	1	7.76202e-06
MAT2A	non-TF	2.00385e-09	-2.84229	0.053	0.975	4.07884e-05		TRUE
GTF2A1	non-TF	9.22065e-10	-2.84946	0	0.975	1.87686e-05
C11orf87	non-TF	8.03515e-08	-2.86364	0.158	1	0.00163556
HSPA8	non-TF	1.6743e-09	-2.86927	0.895	1	3.40805e-05		TRUE
USP37	non-TF	3.81332e-10	-2.89428	0	1	7.76202e-06
CFAP45	non-TF	2.39683e-09	-2.8957	0.105	1	4.87875e-05
FAM149A	non-TF	9.22065e-10	-2.89729	0	0.975	1.87686e-05
PPP1R15A	non-TF	3.0825e-08	-2.92735	0.263	0.975	0.000627443
RASD2	non-TF	9.22065e-10	-2.96479	0	0.975	1.87686e-05
GSK3B	non-TF	4.47781e-09	-2.96913	0.105	0.95	9.11457e-05		TRUE
SLC5A3	non-TF	1.95894e-09	-2.97223	0.105	1	3.98742e-05		TRUE
CCDC39	non-TF	3.81332e-10	-3.00356	0	1	7.76202e-06
CSDE1	TF	3.38366e-08	-3.04843	0.316	0.95	0.000688745
MOB3B	non-TF	3.46291e-09	-3.05384	0.105	0.975	7.04876e-05		TRUE
KCNA10	non-TF	3.81332e-10	-3.05457	0	1	7.76202e-06		TRUE
HYDIN	non-TF	1.59621e-09	-3.11994	0.263	1	3.24908e-05
DPYSL2	non-TF	1.73482e-09	-3.12174	0.526	1	3.53123e-05		TRUE
PCDH20	non-TF	1.17755e-09	-3.12319	0.105	1	2.3969e-05
LOXHD1	non-TF	3.81332e-10	-3.13227	0	1	7.76202e-06
TMOD1	non-TF	3.36166e-09	-3.1601	0.211	1	6.84267e-05
DUSP8	non-TF	4.99645e-09	-3.17221	0	0.925	0.000101703
YWHAZ	non-TF	6.04285e-10	-3.20156	0.316	1	1.23002e-05
HIPK1	non-TF	3.58604e-08	-3.21892	0.105	0.925	0.000729937		TRUE
NRXN3	non-TF	1.43321e-08	-3.23695	0.158	0.95	0.000291729
ZWINT	non-TF	9.22065e-10	-3.25362	0	0.975	1.87686e-05
GAS6	non-TF	5.21653e-10	-3.28454	0.053	1	1.06182e-05		TRUE
GID8	non-TF	4.69705e-10	-3.30411	0.053	1	9.56085e-06
BRAF	non-TF	3.81332e-10	-3.30653	0	1	7.76202e-06		TRUE
EGR1	TF	7.69839e-09	-3.31416	0.368	1	0.000156701		TRUE
BTG2	non-TF	9.89529e-10	-3.38526	0.421	1	2.01419e-05
HSD17B7	non-TF	3.81332e-10	-3.39534	0	1	7.76202e-06
PSAT1	non-TF	5.14477e-10	-3.3961	0.105	1	1.04722e-05
CFAP43	non-TF	7.032e-10	-3.42512	0.105	1	1.43136e-05
GRK4	non-TF	3.81332e-10	-3.44769	0	1	7.76202e-06		TRUE
POLE	non-TF	9.22065e-10	-3.46735	0	0.975	1.87686e-05		TRUE
MN1	non-TF	1.17755e-09	-3.49925	0.105	1	2.3969e-05
ACBD7	non-TF	3.81332e-10	-3.53472	0	1	7.76202e-06
MAP1B	non-TF	7.86489e-10	-3.56044	0.579	1	1.6009e-05
RBM24	non-TF	6.63355e-10	-3.66536	0.211	1	1.35026e-05
TSPAN12	non-TF	9.22065e-10	-3.83886	0	0.975	1.87686e-05
AP3B2	non-TF	5.71108e-10	-3.84474	0.105	1	1.16249e-05
TWF1	non-TF	6.56677e-10	-3.94894	0.421	1	1.33667e-05
UBC	non-TF	6.95425e-10	-4.03537	0.526	1	1.41554e-05		TRUE
FBXO32	non-TF	6.56677e-10	-4.06642	0.421	1	1.33667e-05
KCNQ1OT1	non-TF	6.04285e-10	-4.25831	0.316	1	1.23002e-05
ANXA5	non-TF	6.04285e-10	-4.41326	0.316	1	1.23002e-05		TRUE
CLDN9	non-TF	5.39017e-10	-4.61636	0.211	1	1.09717e-05

## Sheet: Table S4. HC
Table S4. Differential expression analysis between human and mouse HC, Wilcoxon rank-sum test with a Bonferroni Padj < .05, log2 FC > |2|. Related to Figure 4e.
Transcription factors (TF) were detected using AnimalTFDB 3.0, druggable targets using DGIdb 4.0.
Gene	TF	p_val	avg_log2FC	pct.1	pct.2	p_val_adj	HC_enriched	Drug
SCGB2A1	non-TF	7.42194e-59	4.95091	0.965	0	4.1502e-54	TRUE
S100A13	non-TF	1.25479e-40	4.17865	1	0.786	7.01654e-36
CCNI	non-TF	7.75691e-39	3.83581	0.942	0.358	4.33751e-34	TRUE
UQCRB	non-TF	5.71195e-38	3.50965	0.965	0.547	3.19401e-33		TRUE
UQCRQ	non-TF	9.41369e-36	3.50554	0.965	0.915	5.26395e-31	TRUE
JUND	TF	1.62813e-42	3.37903	0.872	0.109	9.10417e-38		TRUE
COX17	non-TF	1.00851e-32	3.27422	0.942	0.856	5.63936e-28	TRUE
TSTD1	non-TF	5.50815e-36	3.22869	0.826	0.154	3.08005e-31
COX6A1	non-TF	3.55955e-39	3.2275	0.988	0.94	1.99043e-34	TRUE
PTRH1	non-TF	4.65263e-46	3.1896	0.86	0.05	2.60166e-41	TRUE
DYNLL1	non-TF	2.02363e-33	3.17871	0.93	0.592	1.13157e-28	TRUE
NDUFB2	non-TF	1.9172e-39	3.17797	0.988	0.771	1.07206e-34		TRUE
SNCG	non-TF	1.70129e-28	3.17188	0.86	0.448	9.51328e-24	TRUE
ABCA5	non-TF	5.80265e-34	3.13432	0.953	0.736	3.24472e-29	TRUE	TRUE
SEC62	non-TF	3.98192e-32	3.11038	0.93	0.731	2.22661e-27
CAMK2N1	non-TF	3.64788e-25	3.10342	0.837	0.527	2.03982e-20	TRUE
C20orf85	non-TF	2.41453e-44	3.06663	0.767	0	1.35015e-39	TRUE
WFDC2	non-TF	8.7961e-39	3.0351	0.744	0.035	4.9186e-34
PKIB	non-TF	2.21376e-40	2.98547	0.744	0.02	1.23789e-35	TRUE
FKBP2	non-TF	3.90407e-28	2.93863	0.802	0.289	2.18308e-23
GAMT	non-TF	3.91549e-39	2.92199	0.709	0.01	2.18947e-34	TRUE
ATP6V1F	non-TF	1.45084e-34	2.91065	0.953	0.726	8.11278e-30	TRUE
ATP5F1E	non-TF	2.84832e-37	2.8976	0.977	0.95	1.59272e-32		TRUE
UQCR10	non-TF	1.03998e-29	2.80709	0.919	0.846	5.81537e-25		TRUE
PCSK1N	non-TF	2.80513e-38	2.78305	0.744	0.04	1.56857e-33
KRT10	non-TF	7.35242e-28	2.77604	0.779	0.244	4.11132e-23		TRUE
NDUFC2	non-TF	1.68827e-31	2.76367	0.93	0.761	9.44049e-27		TRUE
CST3	non-TF	7.34961e-30	2.75554	0.907	0.512	4.10975e-25		TRUE
C2orf40	non-TF	3.55119e-32	2.74586	0.756	0.119	1.98575e-27	TRUE
HOPX	TF	1.99742e-17	2.71915	0.767	0.607	1.11692e-12	TRUE
S100A6	non-TF	2.45969e-08	2.70298	0.291	0.065	0.00137541
S100A1	non-TF	6.12744e-40	2.68328	1	0.98	3.42634e-35
ADAM11	non-TF	3.9992e-23	2.61014	0.767	0.249	2.23627e-18	TRUE
MALAT1	non-TF	6.75485e-39	2.58519	0.988	1	3.77718e-34		TRUE
LAPTM4A	non-TF	2.55828e-30	2.56994	0.86	0.353	1.43054e-25
B2M	non-TF	6.2861e-13	2.56638	0.581	0.274	3.51506e-08		TRUE
TMA7	non-TF	1.71445e-35	2.55924	0.965	0.9	9.58687e-31
ATP5MC2	non-TF	6.70987e-26	2.54627	0.884	0.846	3.75202e-21
NDUFA4	non-TF	1.79089e-38	2.54041	1	0.99	1.00143e-33	TRUE	TRUE
EID1	non-TF	3.39013e-32	2.53791	0.837	0.239	1.89569e-27
TCF7	TF	2.18945e-29	2.51661	0.57	0.015	1.22429e-24
OST4	non-TF	8.7493e-32	2.51034	0.93	0.781	4.89243e-27
FAM183A	non-TF	1.44801e-31	2.48109	0.953	0.896	8.09699e-27	TRUE
ENC1	non-TF	9.74938e-34	2.47833	0.628	0.01	5.45166e-29	TRUE
PCBD1	non-TF	9.60379e-27	2.41374	0.64	0.085	5.37024e-22	TRUE	TRUE
C1orf232	non-TF	1.5758e-26	2.39845	0.895	0.871	8.81153e-22	TRUE
C9orf116	non-TF	1.34292e-33	2.38899	0.605	0	7.50934e-29	TRUE
EFHD2	non-TF	3.12685e-27	2.37549	0.663	0.095	1.74847e-22	TRUE
TIMP1	non-TF	1.03354e-30	2.36744	0.558	0	5.77935e-26
FAU	non-TF	1.71089e-28	2.36354	0.919	0.955	9.56698e-24
ATP5ME	non-TF	1.23897e-10	2.35103	0.733	0.945	6.92807e-06
WDR25	non-TF	3.81459e-33	2.31836	0.709	0.06	2.13304e-28	TRUE
ANAPC16	non-TF	2.46992e-28	2.29704	0.814	0.303	1.38113e-23
SOD1	non-TF	5.61111e-30	2.27613	0.93	0.9	3.13762e-25		TRUE
CXCL14	non-TF	2.41271e-12	2.23164	0.256	0.99	1.34914e-07
MRPL57	non-TF	3.55117e-20	2.22296	0.779	0.468	1.98574e-15	TRUE
SRP14	non-TF	2.93405e-34	2.19082	0.977	0.905	1.64066e-29
AP3S1	non-TF	1.07657e-24	2.18557	0.849	0.403	6.01994e-20	TRUE
SERF2	non-TF	4.1124e-28	2.1826	0.919	0.97	2.29957e-23
CRIP3	non-TF	1.72806e-18	2.18086	0.767	0.483	9.66296e-14	TRUE
MLEC	non-TF	6.13063e-26	2.18076	0.733	0.179	3.42813e-21
NAA38	non-TF	7.92933e-14	2.17777	0.721	0.602	4.43392e-09	TRUE
COX7C	non-TF	7.08061e-21	2.16841	0.86	0.99	3.95934e-16
VPS28	non-TF	7.19438e-33	2.16578	0.593	0	4.02295e-28
NDUFC1	non-TF	2.6559e-21	2.14597	0.849	0.9	1.48513e-16		TRUE
ATOX1	non-TF	1.05202e-12	2.13271	0.709	0.637	5.88271e-08
HLA-DQB1	non-TF	6.65795e-28	2.12156	0.512	0	3.72299e-23	TRUE	TRUE
UQCR11	non-TF	1.34156e-26	2.1156	0.907	0.905	7.50171e-22
PPP1R27	non-TF	1.70291e-12	2.11407	0.849	0.945	9.52234e-08	TRUE
PPDPF	non-TF	2.12057e-16	2.10848	0.767	0.662	1.18578e-11
C1orf194	non-TF	1.03354e-30	2.09849	0.558	0	5.77935e-26	TRUE
METRN	non-TF	4.61637e-23	2.08838	0.605	0.1	2.58138e-18
CD63	non-TF	6.49254e-14	2.05755	0.616	0.289	3.6305e-09		TRUE
H1FX	non-TF	3.02788e-25	2.05515	0.523	0.025	1.69313e-20
LAMTOR4	non-TF	7.24705e-08	2.03845	0.512	0.328	0.0040524
C11orf97	non-TF	1.00775e-28	2.03739	0.57	0.02	5.63511e-24	TRUE
CSTB	non-TF	7.73914e-16	2.03291	0.686	0.383	4.32757e-11
CUTA	non-TF	2.06943e-13	2.01961	0.674	0.468	1.15719e-08
COQ6	non-TF	1.35433e-19	1.98322	0.512	0.065	7.57314e-15	TRUE
AURKAIP1	non-TF	1.86422e-14	1.94947	0.709	0.532	1.04243e-09
RSPH1	non-TF	9.86091e-25	1.9405	0.919	0.826	5.51402e-20	TRUE
FIBP	non-TF	2.22226e-16	1.93913	0.488	0.095	1.24264e-11	TRUE
COPRS	non-TF	2.337e-15	1.93396	0.698	0.428	1.30681e-10	TRUE
BBOF1	non-TF	3.99849e-12	1.93066	0.709	0.602	2.23588e-07	TRUE
HINT1	non-TF	4.63312e-09	1.92761	0.57	0.393	0.000259075		TRUE
DUT	non-TF	2.57213e-19	1.90884	0.686	0.264	1.43829e-14		TRUE
DNPH1	non-TF	1.70919e-20	1.89902	0.628	0.154	9.55743e-16	TRUE
NDUFB7	non-TF	5.49809e-13	1.89131	0.744	0.771	3.07442e-08		TRUE
COPS9	non-TF	4.02674e-10	1.89124	0.686	0.706	2.25167e-05
NUCB2	non-TF	6.81336e-14	1.88349	0.5	0.144	3.80989e-09		TRUE
PLCG2	non-TF	1.34336e-28	1.86351	0.523	0	7.51182e-24		TRUE
SHTN1	non-TF	2.05065e-16	1.85603	0.826	0.846	1.14668e-11	TRUE
FMC1	non-TF	3.27835e-09	1.84586	0.5	0.259	0.000183319
ELOB	non-TF	7.36896e-11	1.83962	0.744	0.94	4.12057e-06
FAM19A3	non-TF	5.73968e-15	1.83805	0.581	0.204	3.20952e-10	TRUE
ERP29	non-TF	5.32574e-17	1.8276	0.744	0.448	2.97805e-12
SCAND1	non-TF	8.90249e-07	1.82737	0.57	0.517	0.049781
MT3	non-TF	8.33471e-19	1.8061	0.453	0.045	4.66061e-14	TRUE	TRUE
CALM3	non-TF	2.30424e-16	1.80531	0.814	0.91	1.28848e-11	TRUE
COX5B	non-TF	1.12372e-23	1.80353	0.895	0.915	6.28361e-19
BRICD5	non-TF	1.54347e-13	1.79559	0.372	0.05	8.63079e-09
TMEM219	non-TF	4.64207e-21	1.78708	0.57	0.095	2.59575e-16
CAST	non-TF	6.70492e-17	1.7783	0.535	0.119	3.74926e-12		TRUE
PTMA	non-TF	1.09426e-18	1.77168	0.884	0.96	6.1189e-14		TRUE
PGK1	non-TF	2.82243e-18	1.76064	0.767	0.348	1.57825e-13	TRUE	TRUE
TOMM7	non-TF	3.38918e-21	1.75921	0.884	0.99	1.89516e-16
UBL5	non-TF	1.71672e-13	1.7501	0.779	0.94	9.59955e-09
TRMT112	non-TF	9.5169e-09	1.7476	0.64	0.607	0.000532166
PCP4	non-TF	2.71863e-16	1.74488	0.907	0.766	1.5202e-11	TRUE
SNHG18	non-TF	4.4724e-21	1.74101	0.407	0.005	2.50088e-16	TRUE
CHGA	non-TF	2.32732e-11	1.73484	0.581	0.284	1.30139e-06	TRUE
NDUFA1	non-TF	2.09493e-11	1.72845	0.744	0.876	1.17144e-06		TRUE
SURF1	non-TF	4.50742e-16	1.71915	0.628	0.254	2.52046e-11
LSM7	non-TF	4.74828e-10	1.7118	0.686	0.682	2.65514e-05
PLA2G16	non-TF	2.55941e-14	1.70522	0.581	0.224	1.43117e-09
PSIP1	non-TF	4.78266e-09	1.70141	0.558	0.363	0.000267437		TRUE
TAC1	non-TF	9.07891e-11	1.69124	0.198	0	5.07674e-06	TRUE	TRUE
CFAP157	non-TF	4.01187e-16	1.6735	0.512	0.119	2.24336e-11	TRUE
OCIAD2	non-TF	8.62168e-16	1.66519	0.814	0.493	4.82107e-11	TRUE
COX7A2	non-TF	3.47465e-18	1.66271	0.86	0.965	1.94295e-13
LGALS3BP	non-TF	3.42926e-15	1.65713	0.465	0.09	1.91758e-10
AKNAD1	non-TF	5.75631e-17	1.64538	0.547	0.129	3.21882e-12	TRUE
CCDC146	non-TF	4.38713e-09	1.631	0.558	0.343	0.000245319	TRUE
PARVB	non-TF	1.50339e-13	1.62477	0.43	0.09	8.40665e-09	TRUE
CHGB	non-TF	2.04532e-08	1.62315	0.5	0.249	0.0011437	TRUE
PARK7	non-TF	1.03932e-19	1.62227	0.849	0.816	5.81165e-15
BOLA3	non-TF	5.65455e-08	1.62126	0.616	0.542	0.00316191
SPCS1	non-TF	3.27131e-20	1.61684	0.872	0.861	1.82925e-15
UBE2M	non-TF	2.82567e-12	1.60359	0.453	0.129	1.58006e-07
TBCA	non-TF	1.49812e-09	1.59379	0.686	0.672	8.37718e-05
SYT1	non-TF	1.59267e-09	1.59264	0.581	0.338	8.90589e-05	TRUE	TRUE
PRDX4	non-TF	1.06104e-15	1.58504	0.419	0.055	5.93315e-11		TRUE
ATP5IF1	non-TF	1.7276e-13	1.58193	0.802	0.94	9.6604e-09
NDUFAF3	non-TF	2.96641e-08	1.57044	0.616	0.512	0.00165876		TRUE
SSB	non-TF	1.78329e-09	1.56836	0.663	0.552	9.9718e-05
STARD10	non-TF	8.30596e-14	1.56729	0.756	0.527	4.64452e-09	TRUE
SLC16A4	non-TF	6.47588e-20	1.56172	0.372	0	3.62118e-15	TRUE
TMEM205	non-TF	2.22206e-12	1.5561	0.465	0.139	1.24253e-07
PSMB5	non-TF	1.82733e-11	1.55428	0.709	0.687	1.02181e-06		TRUE
DPP7	non-TF	9.50256e-14	1.55374	0.465	0.104	5.31364e-09		TRUE
RAB2A	non-TF	5.00949e-16	1.54888	0.686	0.289	2.80121e-11
ARL6IP5	non-TF	1.14668e-09	1.54713	0.663	0.597	6.412e-05
ATP5MF	non-TF	1.94808e-07	1.5435	0.698	0.93	0.0108933
DCXR	non-TF	2.59791e-17	1.53458	0.43	0.045	1.4527e-12
WDR83OS	non-TF	2.92146e-09	1.53323	0.57	0.383	0.000163362
SSR4	non-TF	7.78219e-10	1.5282	0.686	0.632	4.35164e-05
TMEM165	non-TF	8.98829e-16	1.52748	0.407	0.045	5.02607e-11
ATP6V1C2	non-TF	2.10255e-13	1.52622	0.349	0.04	1.17571e-08	TRUE
PRDX1	non-TF	6.07562e-21	1.51221	0.953	0.93	3.39736e-16		TRUE
RTN4	non-TF	3.5242e-14	1.51196	0.43	0.08	1.97066e-09		TRUE
MORN5	non-TF	9.58105e-08	1.51071	0.453	0.229	0.00535753	TRUE
MRPL40	non-TF	1.30884e-09	1.50924	0.535	0.294	7.31878e-05
MAP3K13	non-TF	2.33483e-07	1.50827	0.488	0.289	0.0130559		TRUE
ERLEC1	non-TF	3.22086e-07	1.50491	0.581	0.463	0.0180104
NACA	non-TF	1.60832e-17	1.50169	0.872	0.905	8.99343e-13
EIF1	non-TF	2.22562e-26	1.4917	0.965	0.995	1.24452e-21
HNRNPM	non-TF	4.23549e-10	1.49112	0.628	0.423	2.3684e-05
RWDD1	non-TF	7.053e-08	1.48878	0.547	0.378	0.0039439
ALKBH7	non-TF	1.74806e-09	1.48294	0.43	0.159	9.77477e-05
KIAA2013	non-TF	2.07181e-10	1.47316	0.349	0.07	1.15852e-05	TRUE
CLTA	non-TF	3.14914e-14	1.4621	0.814	0.776	1.76093e-09
CCDC28B	non-TF	1.08132e-09	1.46107	0.686	0.632	6.04654e-05	TRUE
ERICH3	non-TF	9.29932e-08	1.44079	0.721	0.682	0.00519999	TRUE	TRUE
LRRC10B	non-TF	4.9447e-08	1.43973	0.523	0.284	0.00276497	TRUE
RNF149	non-TF	2.11089e-11	1.43696	0.453	0.124	1.18037e-06	TRUE
BLOC1S1	non-TF	5.27408e-07	1.43595	0.628	0.652	0.0294916
ATP5PO	non-TF	1.57342e-14	1.43556	0.814	0.831	8.79823e-10
DRAP1	non-TF	4.47226e-12	1.43163	0.395	0.085	2.5008e-07
SRP9	non-TF	1.04624e-07	1.43029	0.628	0.617	0.00585034
MLLT1	non-TF	8.80111e-16	1.42827	0.395	0.04	4.92141e-11	TRUE
PDLIM1	non-TF	4.58882e-21	1.42529	0.407	0.005	2.56598e-16
RABAC1	non-TF	8.90861e-08	1.41882	0.651	0.632	0.00498151
XRCC5	non-TF	1.24689e-11	1.41822	0.686	0.413	6.97235e-07		TRUE
BRI3	non-TF	6.8344e-10	1.41744	0.395	0.119	3.82166e-05
PSME1	non-TF	6.33501e-11	1.41162	0.36	0.075	3.54241e-06		TRUE
CSRP2	non-TF	6.11944e-12	1.40963	0.221	0	3.42187e-07
CALCOCO2	non-TF	5.14027e-18	1.39857	0.337	0	2.87434e-13
NRN1	non-TF	6.25783e-15	1.38281	0.279	0	3.49925e-10	TRUE
PFDN5	non-TF	1.19068e-18	1.38232	0.895	0.915	6.65806e-14
PPP1R1C	non-TF	1.38769e-16	1.38112	0.326	0.005	7.75966e-12	TRUE
C5orf49	non-TF	4.93833e-10	1.37865	0.686	0.517	2.76142e-05	TRUE
ROPN1L	non-TF	2.90081e-11	1.37548	0.326	0.05	1.62207e-06	TRUE
BMP2	non-TF	1.35711e-08	1.37115	0.349	0.09	0.00075887	TRUE	TRUE
ZSCAN18	TF	9.75386e-08	1.37017	0.453	0.209	0.00545416	TRUE
PTRHD1	non-TF	5.9009e-10	1.36958	0.43	0.144	3.29966e-05
NDUFA12	non-TF	3.00142e-09	1.36203	0.721	0.91	0.000167833		TRUE
SAT2	non-TF	3.76282e-14	1.35803	0.372	0.045	2.10409e-09
TMX4	non-TF	2.34483e-09	1.3482	0.558	0.294	0.000131118	TRUE
TPT1	non-TF	4.32363e-22	1.34253	0.942	0.995	2.41769e-17		TRUE
SH3BGR	non-TF	4.04342e-15	1.3406	0.326	0.015	2.261e-10
STMN1	non-TF	8.76283e-08	1.33216	0.314	0.09	0.0049		TRUE
NDUFB10	non-TF	3.60899e-14	1.32691	0.802	0.801	2.01807e-09		TRUE
MRPL51	non-TF	2.2995e-08	1.32501	0.581	0.408	0.00128583
LYSMD2	non-TF	1.87776e-08	1.32403	0.57	0.363	0.00105001	TRUE
SLC25A26	non-TF	2.70625e-12	1.32281	0.244	0.005	1.51328e-07
CD79A	non-TF	6.11944e-12	1.30829	0.221	0	3.42187e-07	TRUE
UBXN4	non-TF	7.06213e-07	1.30781	0.64	0.627	0.03949
SNF8	non-TF	1.63717e-09	1.30455	0.337	0.08	9.15474e-05
PRDX2	non-TF	1.29032e-20	1.30266	0.953	0.945	7.21521e-16
CLDN5	non-TF	6.11944e-12	1.29419	0.221	0	3.42187e-07	TRUE
DNAAF1	non-TF	1.15933e-08	1.29405	0.477	0.209	0.000648273	TRUE
KIF9	non-TF	1.50854e-12	1.29367	0.837	0.831	8.43545e-08	TRUE
SYT14	non-TF	1.02011e-08	1.29239	0.826	0.816	0.000570424	TRUE
EIF3K	non-TF	2.87237e-09	1.27722	0.698	0.667	0.000160617
RACK1	non-TF	1.71548e-12	1.27468	0.744	0.602	9.59264e-08
CYB5R1	non-TF	3.06868e-07	1.27431	0.57	0.363	0.0171595	TRUE	TRUE
C1orf56	non-TF	2.38658e-10	1.27131	0.221	0.01	1.33453e-05
SAMD15	non-TF	2.32004e-08	1.25705	0.267	0.05	0.00129732	TRUE
HSP90AA1	non-TF	1.13077e-23	1.25237	0.988	0.995	6.32303e-19	TRUE	TRUE
FBXO2	non-TF	4.63077e-22	1.24954	1	0.995	2.58943e-17
FXYD3	non-TF	1.88051e-07	1.24479	0.163	0.01	0.0105154
RPAIN	non-TF	6.71222e-11	1.24219	0.395	0.1	3.75334e-06
FAM229B	non-TF	4.90295e-07	1.23152	0.43	0.219	0.0274163
YIF1A	non-TF	4.48807e-08	1.21662	0.547	0.323	0.00250964
LRRC23	non-TF	2.47354e-07	1.21628	0.314	0.095	0.0138316
PLEKHA3	non-TF	1.21271e-09	1.21354	0.337	0.075	6.78125e-05
CRABP1	non-TF	2.52265e-14	1.21041	0.267	0	1.41061e-09	TRUE
AGR2	non-TF	6.11944e-12	1.20333	0.221	0	3.42187e-07
GCSH	non-TF	4.25087e-08	1.20258	0.349	0.109	0.002377
CYB5A	non-TF	1.02598e-08	1.19833	0.651	0.532	0.000573705
DHCR7	non-TF	1.98623e-07	1.19415	0.326	0.095	0.0111066		TRUE
CCDC170	non-TF	1.00818e-13	1.19287	0.256	0	5.63752e-09	TRUE
CCDC150	non-TF	2.59694e-13	1.1922	0.279	0.01	1.45216e-08	TRUE
TMEM179B	non-TF	1.53878e-15	1.16569	0.291	0	8.60457e-11
JPX	non-TF	5.41794e-07	1.15734	0.302	0.095	0.030296
SULT1C4	non-TF	1.56998e-12	1.15538	0.233	0	8.779e-08	TRUE	TRUE
SNORC	non-TF	9.07891e-11	1.14837	0.198	0	5.07674e-06
ADAM12	non-TF	1.85043e-08	1.14164	0.221	0.025	0.00103472		TRUE
MYL6B	non-TF	1.74796e-11	1.13458	0.302	0.035	9.77422e-07
GOPC	non-TF	9.60641e-10	1.1322	0.279	0.04	5.37171e-05
CCDC68	non-TF	1.47894e-10	1.1293	0.814	0.881	8.26993e-06	TRUE
BTF3	non-TF	5.20064e-09	1.11586	0.733	0.786	0.000290809
MSRB2	non-TF	3.33965e-08	1.11211	0.488	0.244	0.00186747
DPCD	non-TF	3.99508e-13	1.10528	0.244	0	2.23397e-08
AKR1A1	non-TF	9.09145e-12	1.09858	0.872	0.846	5.08376e-07		TRUE
FXYD6	non-TF	2.55129e-11	1.09682	0.267	0.02	1.42663e-06
SRSF9	non-TF	6.47483e-07	1.09145	0.314	0.104	0.0362059
LIN7B	non-TF	7.67575e-07	1.09068	0.267	0.07	0.0429213
TERF2IP	non-TF	6.20197e-08	1.08925	0.674	0.483	0.00346802
POMP	non-TF	2.45241e-10	1.08836	0.767	0.796	1.37134e-05
SQLE	non-TF	1.74552e-07	1.08385	0.709	0.557	0.00976058	TRUE	TRUE
C19orf81	non-TF	1.39601e-08	1.07672	0.244	0.035	0.00078062
FTH1	non-TF	2.01697e-30	1.07141	1	1	1.12785e-25		TRUE
COL9A2	non-TF	4.5354e-07	1.05854	0.279	0.075	0.025361
ARFGAP3	non-TF	7.59732e-07	1.05815	0.314	0.104	0.0424827
NDUFA2	non-TF	7.06178e-07	1.04883	0.721	0.965	0.0394881		TRUE
PPM1J	non-TF	6.67167e-08	1.04074	0.209	0.025	0.00373066
MPST	non-TF	6.88635e-09	1.03303	0.244	0.03	0.000385071		TRUE
ERO1B	non-TF	6.63901e-07	1.01498	0.384	0.159	0.037124	TRUE
SEPT9	non-TF	8.8686e-11	1.00369	0.267	0.025	4.95914e-06
HDAC2	non-TF	2.00694e-09	-1.00014	0.14	0.547	0.000112224		TRUE
ENO4	non-TF	7.01432e-22	-1.00085	0.012	0.682	3.92227e-17
CACNB2	non-TF	8.74425e-17	-1.00146	0.023	0.587	4.88961e-12		TRUE
MDH1	non-TF	8.23885e-11	-1.00146	0.36	0.841	4.607e-06
THOP1	non-TF	5.53128e-09	-1.00178	0.023	0.358	0.000309298		TRUE
IPO5	non-TF	9.70971e-12	-1.00214	0	0.403	5.42947e-07
MCRIP1	non-TF	7.57593e-15	-1.00353	0.035	0.557	4.23631e-10
HRASLS	non-TF	6.87225e-12	-1.00549	0.023	0.453	3.84282e-07
ADPRH	non-TF	5.70961e-15	-1.00605	0.012	0.517	3.1927e-10
FBXL5	non-TF	1.5307e-13	-1.00634	0.128	0.667	8.55936e-09
NDUFA7	non-TF	4.25815e-24	-1.0065	0.116	0.95	2.38107e-19		TRUE
LHFPL2	non-TF	4.54934e-09	-1.00705	0	0.318	0.00025439
DNAJB13	non-TF	8.16553e-13	-1.00723	0.116	0.652	4.566e-08
MINDY1	non-TF	2.2277e-20	-1.00873	0.023	0.667	1.24569e-15
SPEF1	non-TF	1.03822e-13	-1.00914	0.116	0.667	5.80551e-09
TUBB	non-TF	3.35894e-11	-1.0097	0.163	0.647	1.87825e-06		TRUE
UST	non-TF	1.57638e-10	-1.00995	0.012	0.388	8.81482e-06		TRUE
NHSL1	non-TF	4.05173e-10	-1.01053	0.116	0.542	2.26565e-05
MAPK15	non-TF	1.8672e-18	-1.01136	0.128	0.796	1.0441e-13		TRUE
EPHA1	non-TF	2.28508e-09	-1.01245	0	0.328	0.000127777		TRUE
PAF1	non-TF	2.5539e-14	-1.01247	0.035	0.542	1.42809e-09
TDRD3	non-TF	3.72101e-12	-1.01274	0.023	0.463	2.08072e-07
SGK1	non-TF	2.7669e-07	-1.01412	0.093	0.408	0.015472		TRUE
SAR1B	non-TF	1.63398e-13	-1.01446	0.058	0.552	9.13688e-09
IARS	non-TF	1.12215e-12	-1.01448	0.07	0.542	6.27481e-08
MAF1	TF	4.49328e-13	-1.01527	0.186	0.751	2.51255e-08
ARGLU1	non-TF	4.4998e-15	-1.01563	0.384	0.995	2.5162e-10
POLDIP2	non-TF	8.97665e-12	-1.01596	0.093	0.557	5.01957e-07
TRIM37	non-TF	4.29703e-16	-1.01696	0.058	0.637	2.40281e-11
CPEB4	non-TF	2.80374e-21	-1.01712	0.151	0.91	1.5678e-16
CUL4A	non-TF	2.90411e-10	-1.01714	0.093	0.517	1.62392e-05		TRUE
FBXW9	non-TF	8.91992e-10	-1.01742	0.058	0.453	4.98784e-05
NUP88	non-TF	2.2207e-11	-1.01837	0.012	0.418	1.24177e-06
OGDHL	non-TF	2.37735e-11	-1.01847	0.023	0.438	1.32936e-06
SLC25A19	non-TF	7.66649e-16	-1.01893	0.023	0.567	4.28695e-11
CLCN4	non-TF	1.18423e-10	-1.02054	0.093	0.522	6.622e-06		TRUE
KDM7A	non-TF	5.67375e-16	-1.02082	0.023	0.567	3.17265e-11		TRUE
WDPCP	non-TF	3.30773e-13	-1.02302	0.012	0.473	1.84962e-08
ANAPC2	non-TF	6.05269e-11	-1.02528	0.012	0.403	3.38454e-06
MFSD14A	non-TF	9.70971e-12	-1.02929	0	0.403	5.42947e-07
GTPBP1	non-TF	2.40995e-16	-1.02942	0.023	0.577	1.34759e-11
DTNA	non-TF	1.16519e-07	-1.03095	0.221	0.587	0.0065155
CDC42	non-TF	5.30072e-14	-1.03095	0.279	0.841	2.96406e-09		TRUE
LAMP2	non-TF	5.9838e-13	-1.03124	0.093	0.602	3.34602e-08
ARL8B	non-TF	2.57695e-11	-1.03127	0.047	0.483	1.44098e-06
TOM1L2	non-TF	4.71193e-16	-1.03161	0.07	0.662	2.63481e-11
PLCH1	non-TF	2.83407e-19	-1.03222	0.058	0.716	1.58475e-14
SEC13	non-TF	3.39837e-13	-1.03233	0.023	0.483	1.9003e-08
DCDC2B	non-TF	5.14819e-17	-1.03238	0.093	0.721	2.87876e-12
SEC24C	non-TF	3.08454e-16	-1.03284	0.012	0.552	1.72481e-11
SPNS1	non-TF	4.68314e-12	-1.03565	0.012	0.433	2.61872e-07
MAATS1	non-TF	1.09351e-16	-1.03694	0.07	0.682	6.11468e-12
RB1CC1	non-TF	5.82899e-13	-1.03704	0.058	0.552	3.25946e-08
TRIM45	non-TF	2.08552e-07	-1.03906	0.012	0.284	0.0116618
SEC14L1	non-TF	2.85523e-13	-1.04044	0.174	0.697	1.59659e-08
CHST6	non-TF	6.20345e-09	-1.04066	0.035	0.373	0.000346885
CNOT10	non-TF	6.88477e-15	-1.04095	0.07	0.617	3.84982e-10
PRKAB1	non-TF	2.35869e-13	-1.04226	0.012	0.468	1.31893e-08		TRUE
LPGAT1	non-TF	3.19079e-12	-1.04465	0.035	0.478	1.78422e-07
CCDC151	non-TF	1.8644e-13	-1.04513	0	0.453	1.04253e-08
BUB3	non-TF	3.42976e-10	-1.04551	0.093	0.502	1.91785e-05
WWP2	non-TF	2.44709e-17	-1.04704	0.023	0.602	1.36837e-12
DCAF8	non-TF	6.16799e-14	-1.04725	0.081	0.607	3.44901e-09
FGF10	non-TF	9.35213e-13	-1.04801	0	0.433	5.22952e-08
DRG1	non-TF	1.37933e-09	-1.0508	0.058	0.423	7.71293e-05
TWF2	non-TF	6.5886e-14	-1.05191	0.349	0.91	3.68421e-09	TRUE
C2CD5	non-TF	1.61272e-18	-1.05211	0.012	0.602	9.01802e-14
MED28	non-TF	4.05682e-18	-1.0525	0.116	0.766	2.26849e-13
GDAP1	non-TF	9.58829e-11	-1.0542	0.093	0.517	5.36158e-06
MMP16	non-TF	5.40611e-14	-1.0554	0	0.468	3.02299e-09		TRUE
TPM3	non-TF	1.59273e-14	-1.05746	0.093	0.627	8.90624e-10		TRUE
MFSD14B	non-TF	1.60008e-11	-1.05767	0.047	0.478	8.94732e-07
MAEA	non-TF	7.99776e-13	-1.05812	0.035	0.488	4.47219e-08
JMJD1C	non-TF	9.51e-15	-1.05891	0.116	0.682	5.3178e-10
CLPTM1	non-TF	1.31726e-13	-1.06057	0.163	0.716	7.36588e-09
PDE4B	non-TF	3.19519e-13	-1.06172	0.012	0.468	1.78669e-08		TRUE
BAG2	non-TF	4.55788e-09	-1.06184	0.047	0.403	0.000254868
PPIL4	non-TF	3.3219e-14	-1.06247	0.07	0.592	1.85754e-09
BIRC6	non-TF	2.0826e-26	-1.06255	0.081	0.91	1.16455e-21
UBA2	non-TF	1.26321e-13	-1.06322	0.07	0.587	7.06361e-09		TRUE
ATP6V1E1	non-TF	4.57537e-14	-1.06358	0.128	0.697	2.55846e-09
GABARAPL1	non-TF	1.7345e-18	-1.06375	0.128	0.786	9.699e-14
C21orf2	non-TF	2.1242e-11	-1.06512	0.14	0.607	1.18781e-06
PSMD6	non-TF	2.68867e-11	-1.06553	0.151	0.637	1.50345e-06		TRUE
CHUK	non-TF	4.49698e-12	-1.06563	0	0.413	2.51462e-07		TRUE
RNF187	non-TF	6.25284e-14	-1.06775	0.081	0.602	3.49647e-09
APPL2	non-TF	1.14041e-13	-1.07117	0.035	0.517	6.37695e-09
FECH	non-TF	7.64252e-10	-1.07314	0.023	0.383	4.27354e-05		TRUE
ZNF667	TF	3.55849e-14	-1.07561	0	0.473	1.98984e-09
USP4	non-TF	7.42888e-13	-1.07586	0.035	0.498	4.15408e-08
BNIP3	non-TF	3.9496e-10	-1.0759	0.128	0.552	2.20854e-05
SCAMP1	non-TF	1.71792e-12	-1.07627	0.291	0.836	9.60629e-08
RBM18	non-TF	3.91947e-09	-1.07693	0.035	0.383	0.000219169
ACP2	non-TF	3.51674e-13	-1.07929	0.023	0.478	1.96649e-08
ABCC5	non-TF	1.15004e-19	-1.08022	0.023	0.657	6.4308e-15		TRUE
CPSF6	non-TF	4.68455e-17	-1.08035	0.058	0.657	2.61951e-12
LRRC43	non-TF	2.17205e-13	-1.08039	0.047	0.542	1.21456e-08
ADI1	non-TF	9.58487e-17	-1.08112	0.163	0.811	5.35967e-12
DCAF7	non-TF	5.44223e-17	-1.08125	0.105	0.731	3.04319e-12
KIAA1522	non-TF	5.55283e-18	-1.08195	0.058	0.672	3.10503e-13
WARS	non-TF	4.91164e-11	-1.08681	0.012	0.403	2.74649e-06
KLHL9	non-TF	1.62328e-22	-1.08755	0.035	0.731	9.07704e-18
EXTL2	non-TF	2.42911e-13	-1.08788	0.047	0.527	1.35831e-08
ATP6V1H	non-TF	8.29184e-14	-1.08813	0.047	0.547	4.63663e-09
FCRLB	non-TF	2.24422e-09	-1.08858	0.023	0.373	0.000125492
FAM49A	non-TF	1.7792e-10	-1.0891	0.105	0.542	9.94893e-06
PMVK	non-TF	4.88008e-19	-1.08917	0.035	0.642	2.72884e-14		TRUE
ESPNL	non-TF	1.11501e-23	-1.08948	0.023	0.741	6.23492e-19
TTC3	non-TF	5.37087e-14	-1.0895	0.267	0.871	3.00328e-09
CFAP46	non-TF	3.27726e-13	-1.08951	0.233	0.796	1.83258e-08	TRUE
PLEKHB2	non-TF	7.74633e-10	-1.08972	0.023	0.378	4.33159e-05
HIP1	non-TF	6.42366e-19	-1.09014	0	0.592	3.59198e-14
RIC1	non-TF	3.39418e-32	-1.09025	0	0.851	1.89796e-27
DYNC2H1	non-TF	7.71769e-16	-1.09041	0.116	0.716	4.31558e-11		TRUE
UBC	non-TF	4.19289e-14	-1.09124	0.465	0.92	2.34458e-09		TRUE
COG1	non-TF	1.66811e-13	-1.09125	0.023	0.502	9.32773e-09
SYS1	non-TF	1.09837e-14	-1.09132	0.105	0.657	6.14187e-10
CCNT2	non-TF	1.39801e-14	-1.09208	0.058	0.587	7.81737e-10
ELP2	non-TF	1.7146e-12	-1.09241	0.081	0.562	9.58769e-08
TMCC2	non-TF	3.3818e-14	-1.09247	0.093	0.647	1.89103e-09
MAP2K1	non-TF	1.41505e-13	-1.09258	0.047	0.537	7.9127e-09		TRUE
EYA1	non-TF	4.05609e-18	-1.09317	0.116	0.776	2.26809e-13
SARNP	non-TF	3.77925e-23	-1.09373	0.07	0.821	2.11328e-18
ATP5F1C	non-TF	8.69565e-14	-1.09503	0.372	0.896	4.86244e-09
RPRD1B	non-TF	2.94797e-17	-1.09578	0.023	0.582	1.64845e-12
MARCH8	non-TF	1.78307e-16	-1.09686	0.012	0.547	9.97058e-12
TSPAN13	non-TF	1.09738e-17	-1.09783	0.767	0.995	6.13635e-13
RRP7A	non-TF	2.92212e-13	-1.09895	0.035	0.498	1.63399e-08		TRUE
PTTG1IP	non-TF	1.51408e-10	-1.0995	0.163	0.597	8.46645e-06
HACD1	non-TF	1.44398e-19	-1.10064	0	0.607	8.07447e-15
SRSF10	non-TF	3.16406e-15	-1.10123	0.233	0.816	1.76928e-10		TRUE
SLC39A1	non-TF	5.40261e-28	-1.10287	0.035	0.846	3.02103e-23
MTMR11	non-TF	4.41188e-15	-1.1029	0.035	0.567	2.46704e-10
ING4	non-TF	7.81939e-13	-1.10488	0.058	0.537	4.37244e-08
FZD3	non-TF	7.92577e-15	-1.10528	0.07	0.622	4.43193e-10
ARAF	non-TF	2.92123e-17	-1.10619	0.012	0.577	1.63349e-12		TRUE
DUSP3	non-TF	1.13096e-21	-1.1066	0.023	0.692	6.32408e-17		TRUE
NCALD	non-TF	1.34399e-15	-1.10808	0.012	0.537	7.51533e-11
GATAD1	TF	4.01358e-19	-1.11165	0.093	0.746	2.24431e-14
TMX2	non-TF	9.60886e-10	-1.11217	0.081	0.458	5.37308e-05		TRUE
CLASP2	non-TF	1.1917e-23	-1.11222	0.023	0.741	6.66377e-19
PDHB	non-TF	8.27649e-13	-1.1134	0.279	0.791	4.62805e-08		TRUE
MORF4L2	non-TF	3.18735e-17	-1.11365	0.07	0.667	1.7823e-12
GALK1	non-TF	1.04313e-14	-1.1144	0.023	0.522	5.83299e-10		TRUE
CDC23	non-TF	1.90209e-10	-1.11483	0.14	0.592	1.06361e-05
ZMIZ1	TF	7.20335e-25	-1.11656	0.047	0.806	4.02797e-20
COX7A2L	non-TF	1.89088e-19	-1.11731	0.105	0.781	1.05735e-14
WDR6	non-TF	6.7271e-13	-1.11735	0.081	0.567	3.76166e-08
PAICS	non-TF	9.65609e-13	-1.11766	0.058	0.542	5.39949e-08
CFAP52	non-TF	4.87817e-17	-1.1188	0.14	0.771	2.72778e-12
FGFR1OP	non-TF	1.78838e-26	-1.11988	0.012	0.766	1.00002e-21
CHRAC1	non-TF	2.558e-17	-1.12134	0.023	0.602	1.43038e-12
MTUS1	non-TF	6.47325e-17	-1.12252	0.128	0.736	3.61971e-12
DDB1	non-TF	5.97906e-15	-1.1239	0.105	0.662	3.34337e-10		TRUE
CHCHD10	non-TF	5.52529e-19	-1.12415	0.244	0.985	3.08963e-14
G3BP1	non-TF	1.43706e-14	-1.12574	0.116	0.667	8.03578e-10
LRCH3	non-TF	1.16129e-17	-1.12585	0.198	0.831	6.49371e-13
RNF150	non-TF	2.97983e-17	-1.12644	0	0.552	1.66626e-12
CHN2	non-TF	2.06147e-12	-1.12739	0	0.423	1.15273e-07		TRUE
STK11IP	non-TF	3.00372e-15	-1.12786	0.023	0.552	1.67962e-10
GORASP2	non-TF	2.50224e-17	-1.1284	0.081	0.692	1.3992e-12
DNAH5	non-TF	3.89889e-17	-1.12871	0.081	0.701	2.18018e-12
BCLAF1	TF	1.85576e-15	-1.12871	0.186	0.791	1.0377e-10
CFAP47	non-TF	1.34298e-15	-1.13189	0.07	0.632	7.5097e-11
SLC25A12	non-TF	8.72323e-18	-1.13595	0.035	0.627	4.87786e-13
PFAS	non-TF	2.97983e-17	-1.13695	0	0.552	1.66626e-12
SRPK1	non-TF	4.97593e-16	-1.13842	0.128	0.741	2.78244e-11		TRUE
VEPH1	non-TF	3.8024e-14	-1.1391	0.163	0.731	2.12622e-09
GNS	non-TF	8.13737e-15	-1.13953	0.023	0.532	4.55026e-10
CRIP2	non-TF	3.11639e-13	-1.14122	0.302	0.816	1.74262e-08
OTUB1	non-TF	2.05314e-21	-1.14161	0.093	0.791	1.14807e-16
EXOC7	non-TF	5.64298e-15	-1.14169	0.023	0.532	3.15544e-10
FCHO1	non-TF	2.99412e-17	-1.14194	0.035	0.622	1.67425e-12
PSMD2	non-TF	3.99244e-12	-1.14197	0.174	0.682	2.23249e-07		TRUE
BPGM	non-TF	1.28026e-13	-1.14219	0.07	0.582	7.15896e-09
NEK7	non-TF	1.8818e-16	-1.14286	0	0.532	1.05226e-11		TRUE
OSBPL11	non-TF	1.04687e-11	-1.14715	0.023	0.448	5.85388e-07
AP2M1	non-TF	4.67479e-16	-1.1477	0.291	0.881	2.61405e-11
PPP2R1A	non-TF	4.86356e-15	-1.14802	0.105	0.647	2.71961e-10
UCKL1	non-TF	5.61642e-10	-1.14864	0.081	0.473	3.14059e-05
WDR34	non-TF	1.18799e-14	-1.14964	0.163	0.726	6.64298e-10
TXNDC15	non-TF	7.57855e-14	-1.15084	0.163	0.706	4.23777e-09
CANX	non-TF	4.28334e-13	-1.15135	0.267	0.811	2.39516e-08		TRUE
POLE	non-TF	2.06147e-12	-1.15196	0	0.423	1.15273e-07		TRUE
HSPH1	non-TF	4.24279e-14	-1.15226	0.302	0.851	2.37248e-09	TRUE
FUT8	non-TF	3.67251e-17	-1.15565	0.07	0.672	2.05359e-12
CTSA	non-TF	2.05107e-15	-1.15677	0.07	0.622	1.14692e-10		TRUE
ZNF276	TF	2.59188e-17	-1.15711	0.012	0.577	1.44933e-12
SESTD1	non-TF	3.23817e-15	-1.1595	0.093	0.652	1.81072e-10
PPP5C	non-TF	1.53419e-17	-1.16011	0.047	0.632	8.57888e-13
SEPT2	non-TF	9.01461e-11	-1.16169	0.256	0.751	5.04079e-06
FLYWCH2	non-TF	2.65999e-21	-1.16178	0.093	0.796	1.48741e-16
NSD1	non-TF	1.36357e-18	-1.1621	0.128	0.796	7.62483e-14
PHIP	non-TF	1.15502e-14	-1.163	0.058	0.592	6.45867e-10
GDI2	non-TF	1.63182e-15	-1.1633	0.07	0.617	9.12482e-11
RNASEK	non-TF	4.24995e-28	-1.16451	0.023	0.831	2.37649e-23
PLEKHF2	non-TF	1.1677e-14	-1.16463	0.012	0.502	6.52955e-10
MTMR7	non-TF	2.97983e-17	-1.16493	0	0.552	1.66626e-12
TRIB2	non-TF	2.75991e-12	-1.16526	0.023	0.458	1.54328e-07		TRUE
TMEM263	non-TF	1.71289e-14	-1.16608	0.012	0.502	9.57813e-10
ATXN1	non-TF	4.91309e-21	-1.16698	0.116	0.846	2.7473e-16
GTF2E2	non-TF	7.69283e-15	-1.16718	0.023	0.532	4.30167e-10
RNF4	non-TF	7.58163e-18	-1.16735	0.012	0.587	4.23949e-13
GDPD1	non-TF	1.45013e-15	-1.16856	0.035	0.582	8.10884e-11
RBCK1	TF	3.61714e-17	-1.17106	0.012	0.567	2.02263e-12
FTO	non-TF	1.16153e-15	-1.17161	0.023	0.557	6.49502e-11		TRUE
SLC17A8	non-TF	7.07046e-15	-1.17208	0.023	0.532	3.95366e-10
TNC	non-TF	6.60777e-16	-1.17447	0.151	0.766	3.69494e-11		TRUE
CHTOP	non-TF	9.98228e-16	-1.17464	0.198	0.811	5.58189e-11
CYP51A1	non-TF	2.50437e-11	-1.17562	0.023	0.433	1.40039e-06		TRUE
MED25	non-TF	6.08193e-22	-1.17594	0.105	0.846	3.40089e-17
GAA	non-TF	3.77826e-12	-1.17957	0.035	0.468	2.11273e-07		TRUE
CHCHD6	non-TF	1.39898e-18	-1.18158	0.116	0.771	7.82284e-14
REM2	non-TF	1.47132e-12	-1.1819	0.047	0.507	8.22731e-08
RPN1	non-TF	1.87976e-19	-1.18389	0.174	0.866	1.05112e-14
CARF	TF	3.09683e-24	-1.18512	0	0.706	1.73169e-19
UBXN11	non-TF	1.48568e-18	-1.18581	0.186	0.876	8.30762e-14
CASZ1	TF	5.32176e-16	-1.18591	0.093	0.687	2.97582e-11
JUNB	TF	1.27205e-11	-1.1867	0.174	0.682	7.11303e-07		TRUE
TOM1	non-TF	2.59252e-18	-1.18706	0.023	0.627	1.44969e-13
RHPN1	non-TF	5.38734e-17	-1.18788	0.128	0.751	3.0125e-12
CHKA	non-TF	9.49663e-16	-1.18798	0.012	0.537	5.31032e-11		TRUE
DDX39B	non-TF	2.67609e-18	-1.1882	0.012	0.592	1.49642e-13
FLCN	non-TF	3.16924e-12	-1.18918	0.012	0.433	1.77217e-07		TRUE
ATP6V1A	non-TF	1.03403e-14	-1.18969	0.267	0.836	5.78208e-10
NCSTN	non-TF	6.9941e-15	-1.19161	0.012	0.507	3.91096e-10		TRUE
DUSP18	non-TF	2.07435e-17	-1.19231	0.07	0.672	1.15994e-12
CNOT8	non-TF	1.06668e-17	-1.19249	0.047	0.637	5.96464e-13
NONO	non-TF	4.7193e-14	-1.19252	0.163	0.706	2.63894e-09
ARF1	non-TF	8.06706e-15	-1.19483	0.174	0.741	4.51094e-10
C2orf50	non-TF	9.11717e-17	-1.19578	0.105	0.701	5.09814e-12
C12orf57	non-TF	1.65376e-22	-1.19726	0.198	0.975	9.24748e-18
FAM149A	non-TF	2.77426e-18	-1.1986	0	0.577	1.55131e-13
USP46	non-TF	2.55166e-15	-1.20034	0.163	0.736	1.42684e-10
TMEM63B	non-TF	2.18726e-20	-1.20051	0.081	0.766	1.22307e-15
TSN	non-TF	3.29643e-22	-1.20422	0.047	0.751	1.8433e-17
MFSD1	non-TF	2.20661e-15	-1.2046	0.058	0.602	1.23389e-10
SLC48A1	non-TF	4.52553e-16	-1.20558	0.058	0.617	2.53059e-11
MYCBPAP	non-TF	2.16345e-15	-1.20939	0.035	0.567	1.20976e-10
DRC3	non-TF	1.92391e-16	-1.21175	0.256	0.871	1.07581e-11	TRUE
CNNM4	non-TF	5.96213e-14	-1.21392	0.023	0.512	3.3339e-09
EPHX1	non-TF	1.86039e-16	-1.21446	0.151	0.766	1.04029e-11		TRUE
TMEM30B	non-TF	7.08617e-18	-1.21509	0.023	0.617	3.96244e-13
SFR1	non-TF	6.00582e-24	-1.21573	0.047	0.791	3.35833e-19
DLD	non-TF	1.06593e-13	-1.21746	0.035	0.507	5.96048e-09
CCT4	non-TF	1.60391e-16	-1.21803	0.291	0.851	8.96874e-12
CGN	non-TF	1.29729e-14	-1.22164	0.128	0.697	7.25417e-10
KHDC4	non-TF	7.30529e-25	-1.22205	0.035	0.776	4.08497e-20
KIF3A	non-TF	1.86146e-15	-1.22283	0.233	0.821	1.04089e-10
CLRN1	non-TF	9.34734e-15	-1.22312	0.081	0.622	5.22684e-10
ATP8A1	non-TF	3.03695e-17	-1.22332	0.023	0.597	1.6982e-12
ATP6V1C1	non-TF	5.08943e-14	-1.22384	0.035	0.537	2.84591e-09
ZSCAN26	TF	9.9979e-21	-1.22387	0.047	0.716	5.59062e-16
SLC25A3	non-TF	6.54165e-15	-1.22416	0.43	0.9	3.65796e-10
NBR1	non-TF	3.07699e-18	-1.22556	0.058	0.687	1.72059e-13
EFR3A	non-TF	6.70026e-13	-1.22626	0.233	0.771	3.74665e-08
SF3B3	non-TF	3.06232e-16	-1.22887	0.035	0.592	1.71239e-11		TRUE
CREG1	non-TF	5.24737e-13	-1.23	0.035	0.493	2.93423e-08
UQCRC1	non-TF	1.94377e-13	-1.23108	0.302	0.816	1.08692e-08
LRRC58	non-TF	1.0501e-19	-1.23249	0.047	0.687	5.87193e-15
PIGQ	non-TF	1.71606e-15	-1.23466	0.058	0.617	9.59585e-11
KLHDC3	non-TF	2.76866e-17	-1.23556	0.081	0.682	1.54818e-12
SMG7	non-TF	8.20588e-28	-1.23672	0.081	0.905	4.58856e-23
ZNF230	TF	4.64312e-16	-1.23889	0	0.522	2.59634e-11
AGBL2	non-TF	1.13198e-15	-1.24118	0	0.512	6.32979e-11
DAG1	non-TF	1.57176e-16	-1.2423	0.081	0.662	8.78898e-12
CSDE1	TF	7.80459e-21	-1.24263	0.233	0.92	4.36417e-16
CAPZA2	non-TF	7.67079e-13	-1.24336	0.105	0.602	4.28935e-08
ILF3	non-TF	4.67047e-18	-1.24348	0.244	0.866	2.61163e-13		TRUE
EWSR1	non-TF	3.60045e-16	-1.25029	0.116	0.697	2.0133e-11		TRUE
ATP5PB	non-TF	2.06275e-17	-1.25043	0.291	0.905	1.15345e-12
FZR1	non-TF	1.8644e-13	-1.2512	0	0.453	1.04253e-08
SH2D4B	non-TF	1.89488e-15	-1.25169	0.174	0.761	1.05958e-10
IFT80	non-TF	7.95123e-17	-1.25303	0.023	0.577	4.44617e-12
DDOST	non-TF	1.89092e-19	-1.25416	0.14	0.821	1.05737e-14
SLC35B2	non-TF	8.82065e-15	-1.2562	0.023	0.517	4.93233e-10
SRSF3	non-TF	5.09911e-14	-1.2623	0.209	0.756	2.85132e-09
EIF4H	non-TF	4.77248e-14	-1.26314	0.267	0.806	2.66868e-09		TRUE
GPR155	non-TF	3.26078e-20	-1.26423	0.035	0.672	1.82336e-15
UHRF1BP1L	non-TF	8.18304e-17	-1.26486	0.047	0.622	4.57579e-12
FAM32A	non-TF	3.82436e-18	-1.26606	0.128	0.776	2.13851e-13
FRYL	non-TF	3.0719e-19	-1.26635	0.105	0.786	1.71775e-14
CLASP1	non-TF	1.48287e-21	-1.26913	0.093	0.806	8.2919e-17
MRPS17	non-TF	2.38276e-19	-1.2707	0	0.602	1.33239e-14
RAB11B	non-TF	2.16319e-20	-1.27829	0.14	0.831	1.20961e-15
CFAP54	non-TF	9.90753e-21	-1.28156	0.058	0.721	5.54009e-16
NCOA3	non-TF	3.74787e-24	-1.2831	0.081	0.851	2.09573e-19		TRUE
ALG2	non-TF	4.69832e-16	-1.28357	0.047	0.607	2.62721e-11
IFT172	non-TF	4.1812e-16	-1.28398	0.047	0.597	2.33804e-11
HECTD1	non-TF	9.84883e-15	-1.28707	0.047	0.557	5.50727e-10
EIF5A	non-TF	9.0263e-23	-1.28761	0.174	0.91	5.04733e-18		TRUE
CABCOCO1	non-TF	7.14623e-14	-1.28903	0.012	0.478	3.99603e-09
DNAJB11	non-TF	9.62781e-17	-1.29174	0.209	0.806	5.38368e-12
CACFD1	non-TF	1.37934e-17	-1.29414	0.163	0.791	7.713e-13
NFAT5	TF	1.29034e-21	-1.29671	0.047	0.721	7.21534e-17
PTPRM	non-TF	1.44407e-18	-1.29819	0.047	0.672	8.07495e-14		TRUE
LIFR	non-TF	6.27422e-13	-1.29873	0	0.438	3.50842e-08		TRUE
DAP	non-TF	1.13112e-16	-1.29884	0.047	0.607	6.325e-12
USP9X	non-TF	1.14733e-20	-1.29929	0.116	0.831	6.41562e-16
TUBA1B	non-TF	1.22261e-23	-1.30046	0.174	0.94	6.83658e-19		TRUE
C5orf24	non-TF	2.28077e-20	-1.30048	0.233	0.925	1.27536e-15
HSPA4L	non-TF	1.12141e-15	-1.30451	0.128	0.711	6.2707e-11
TMEM255B	non-TF	4.00804e-14	-1.30567	0.453	0.91	2.24121e-09	TRUE
FAM3C	non-TF	6.26994e-24	-1.30571	0.128	0.9	3.50603e-19
CREBBP	non-TF	6.0179e-29	-1.30635	0.058	0.891	3.36509e-24		TRUE
MAPK6	non-TF	2.45879e-18	-1.30841	0.081	0.697	1.37491e-13		TRUE
BRWD1	non-TF	9.60945e-19	-1.30847	0.047	0.662	5.37341e-14
ZDHHC13	non-TF	1.80055e-14	-1.30886	0.035	0.537	1.00683e-09
CLK1	non-TF	5.99037e-24	-1.30894	0.035	0.761	3.3497e-19		TRUE
LRRC8A	non-TF	6.56957e-32	-1.31058	0.012	0.856	3.67357e-27
LIPH	non-TF	3.04867e-12	-1.31471	0	0.418	1.70475e-07
RAB28	non-TF	9.50895e-19	-1.31534	0.047	0.672	5.31721e-14
WDR7	non-TF	1.31627e-15	-1.31626	0.012	0.532	7.36029e-11
BPHL	non-TF	7.11737e-20	-1.32644	0.081	0.741	3.97989e-15
CCT8	non-TF	4.78709e-15	-1.32767	0.314	0.811	2.67685e-10
CAPRIN1	non-TF	3.94677e-17	-1.32768	0.081	0.682	2.20695e-12
JUP	non-TF	1.87111e-17	-1.32941	0.093	0.701	1.04629e-12
TUBB2A	non-TF	1.27193e-11	-1.33254	0.023	0.448	7.11238e-07		TRUE
RAB3B	non-TF	7.23943e-18	-1.3328	0	0.567	4.04814e-13
CFAP44	non-TF	1.55696e-23	-1.33636	0.14	0.9	8.70622e-19		TRUE
SURF4	non-TF	3.09518e-16	-1.33776	0.023	0.567	1.73076e-11
WDR19	non-TF	4.34386e-20	-1.33934	0.058	0.716	2.429e-15
ATP6V0A1	non-TF	2.10606e-20	-1.34009	0.267	0.945	1.17767e-15
ARHGEF28	non-TF	5.43519e-17	-1.34546	0.023	0.592	3.03925e-12		TRUE
CERS6	non-TF	2.76315e-16	-1.34748	0.047	0.612	1.5451e-11		TRUE
RAB3A	non-TF	5.38442e-24	-1.35421	0.105	0.856	3.01086e-19
TCP1	non-TF	1.45635e-14	-1.35481	0.151	0.687	8.14362e-10
HNRNPK	non-TF	1.02272e-18	-1.35526	0.558	0.975	5.71887e-14
ATP11A	non-TF	2.51389e-24	-1.35613	0.035	0.761	1.40572e-19
USH2A	non-TF	8.3962e-16	-1.35638	0.035	0.572	4.69499e-11
VCP	non-TF	2.97394e-16	-1.35941	0.14	0.721	1.66297e-11		TRUE
DENND5B	non-TF	2.77106e-26	-1.36137	0.012	0.766	1.54952e-21
SPOP	non-TF	7.0928e-18	-1.36233	0.151	0.771	3.96615e-13
IDH1	non-TF	9.3252e-17	-1.36608	0.151	0.741	5.21447e-12		TRUE
VSIG10L2	non-TF	3.67287e-07	-1.36855	0.512	0.721	0.0205379	TRUE
IFT122	non-TF	1.03211e-15	-1.37038	0.081	0.642	5.77135e-11
MEIG1	non-TF	1.19933e-29	-1.37749	0.023	0.851	6.70642e-25
BRD3OS	non-TF	4.3257e-17	-1.37943	0.035	0.607	2.41885e-12
SEC23B	non-TF	2.02824e-13	-1.37977	0.07	0.557	1.13415e-08
DERA	non-TF	6.66122e-21	-1.38218	0	0.637	3.72482e-16
PREPL	non-TF	1.06261e-17	-1.38244	0.128	0.741	5.94191e-13
TMF1	TF	2.59533e-22	-1.38285	0.302	0.995	1.45126e-17
PSMA6	non-TF	3.01982e-16	-1.38666	0.023	0.552	1.68862e-11		TRUE
SOD2	non-TF	3.49644e-24	-1.38683	0.058	0.781	1.95514e-19		TRUE
PGRMC1	non-TF	6.2607e-15	-1.38993	0.151	0.692	3.50086e-10		TRUE
PANX1	non-TF	3.3602e-21	-1.39158	0.012	0.667	1.87896e-16		TRUE
KLF13	TF	3.96065e-23	-1.39633	0.128	0.881	2.21471e-18
TUSC3	non-TF	1.35272e-21	-1.39661	0.093	0.781	7.56413e-17
DOCK9	non-TF	1.08072e-17	-1.39869	0.023	0.602	6.04318e-13
DNAI1	non-TF	5.53477e-28	-1.39922	0.023	0.821	3.09493e-23
CCT5	non-TF	5.8927e-18	-1.40213	0.314	0.896	3.29508e-13
HDAC4	non-TF	1.73713e-22	-1.40362	0.012	0.692	9.71369e-18		TRUE
PLS1	non-TF	2.61923e-21	-1.40461	0.616	0.995	1.46462e-16	TRUE
OSBPL6	non-TF	3.15447e-20	-1.40493	0.116	0.811	1.76392e-15
CERS5	non-TF	1.37263e-16	-1.40552	0.244	0.826	7.67546e-12
MDH2	non-TF	3.74541e-20	-1.41014	0.291	0.91	2.09436e-15		TRUE
BACE1	non-TF	4.68929e-19	-1.41046	0.023	0.642	2.62216e-14		TRUE
HIPK1	non-TF	3.97675e-23	-1.41524	0.058	0.766	2.22372e-18		TRUE
MYO15B	non-TF	4.86427e-19	-1.41597	0.012	0.607	2.72e-14
RUNX1T1	non-TF	4.25056e-26	-1.41669	0.012	0.761	2.37683e-21
CNP	non-TF	1.68779e-13	-1.4174	0.105	0.592	9.43776e-09
DLK2	non-TF	2.83687e-15	-1.41829	0.081	0.637	1.58632e-10
SNRNP200	non-TF	2.20703e-17	-1.41861	0.116	0.716	1.23413e-12
USP22	non-TF	1.81426e-17	-1.41874	0.128	0.731	1.0145e-12
DPH6	non-TF	4.82969e-22	-1.4212	0.035	0.726	2.70067e-17
MORN1	non-TF	1.09966e-24	-1.42213	0.035	0.771	6.1491e-20
CCDC189	non-TF	7.03924e-22	-1.4229	0.035	0.721	3.9362e-17
ASB1	non-TF	1.37435e-19	-1.42559	0.023	0.652	7.68507e-15
TP53INP2	non-TF	9.23433e-26	-1.42789	0	0.736	5.16366e-21
SYNE4	non-TF	4.12082e-18	-1.42888	0.244	0.876	2.30428e-13
LRTM2	non-TF	8.3174e-18	-1.42893	0.221	0.866	4.65092e-13	TRUE
CEP19	non-TF	7.16322e-21	-1.43237	0.035	0.697	4.00553e-16
TBC1D7	non-TF	1.04951e-18	-1.43351	0	0.587	5.86866e-14
CDKL2	non-TF	4.59764e-21	-1.43806	0.07	0.741	2.57091e-16		TRUE
SGTA	non-TF	5.11921e-18	-1.43846	0.047	0.647	2.86256e-13
PPME1	non-TF	6.3942e-17	-1.44211	0.081	0.662	3.57551e-12		TRUE
ENPP5	non-TF	1.17743e-13	-1.44308	0.081	0.592	6.58396e-09
C18orf32	non-TF	6.45078e-24	-1.44523	0.058	0.781	3.60715e-19
PKM	non-TF	2.32863e-18	-1.44782	0.314	0.9	1.30213e-13		TRUE
OSTF1	non-TF	2.89421e-23	-1.4479	0.047	0.771	1.61838e-18
CFAP45	non-TF	1.62654e-21	-1.45029	0.105	0.806	9.09528e-17
NSG1	non-TF	1.44398e-19	-1.45104	0	0.607	8.07447e-15
MAPRE1	non-TF	8.67232e-18	-1.45127	0.116	0.716	4.84939e-13
VMP1	non-TF	1.03686e-14	-1.45398	0.07	0.587	5.79791e-10
CALCOCO1	non-TF	3.06026e-17	-1.45565	0.151	0.746	1.71124e-12
SORBS2	non-TF	1.6187e-22	-1.4577	0.209	0.955	9.05146e-18
NUP153	non-TF	1.33115e-21	-1.45969	0.035	0.706	7.44352e-17
RTN3	non-TF	3.17255e-21	-1.46294	0.163	0.841	1.77403e-16
FAM216A	non-TF	1.23623e-17	-1.46438	0.035	0.617	6.91278e-13
IPO13	non-TF	4.30164e-19	-1.46482	0.058	0.682	2.40539e-14		TRUE
RASD2	non-TF	9.70971e-12	-1.46886	0	0.403	5.42947e-07
MAU2	non-TF	1.43878e-24	-1.47177	0.023	0.751	8.04538e-20
TSC2	non-TF	6.91649e-20	-1.47244	0.07	0.711	3.86756e-15		TRUE
ABHD4	non-TF	1.12188e-20	-1.47316	0	0.632	6.27335e-16
ACO2	non-TF	9.28649e-17	-1.47332	0.047	0.597	5.19282e-12
GABARAP	non-TF	1.06587e-28	-1.47652	0.081	0.925	5.96013e-24
UBE2D3	non-TF	7.46568e-20	-1.47671	0.209	0.851	4.17466e-15
LGR4	non-TF	3.11942e-29	-1.4785	0.012	0.816	1.74432e-24		TRUE
NDEL1	non-TF	2.94745e-16	-1.48044	0.07	0.622	1.64815e-11
RAB6A	non-TF	7.07756e-21	-1.48824	0.047	0.701	3.95763e-16
ACLY	non-TF	3.40857e-15	-1.49144	0.012	0.517	1.90601e-10		TRUE
PSMA3	non-TF	8.28707e-22	-1.49244	0.221	0.915	4.63396e-17		TRUE
NDUFS1	non-TF	2.83586e-18	-1.49684	0.105	0.731	1.58576e-13		TRUE
YOD1	non-TF	1.04951e-18	-1.50121	0	0.587	5.86866e-14
NBEAL1	non-TF	2.05078e-21	-1.50218	0.105	0.806	1.14676e-16
LMBRD1	non-TF	8.25684e-22	-1.50247	0.14	0.841	4.61706e-17
HSPA2	non-TF	7.94183e-14	-1.50278	0.058	0.547	4.44092e-09
CFAP61	non-TF	5.4872e-24	-1.5103	0	0.701	3.06833e-19
GOLT1B	non-TF	4.66509e-20	-1.51248	0.023	0.657	2.60863e-15
ATP2B1	non-TF	6.59811e-18	-1.51253	0.267	0.856	3.68953e-13		TRUE
RNF128	non-TF	7.37235e-20	-1.51259	0.058	0.706	4.12247e-15
ATP8A2	non-TF	8.14995e-20	-1.51266	0.023	0.647	4.55729e-15
SYT13	non-TF	5.60747e-19	-1.51727	0.093	0.726	3.13558e-14
BSG	non-TF	7.99254e-24	-1.51841	0.337	0.965	4.46927e-19		TRUE
SNRPB	non-TF	5.96375e-22	-1.52016	0.128	0.831	3.33481e-17
RAB11A	non-TF	4.79074e-22	-1.52104	0.221	0.896	2.67889e-17
TMEM41B	non-TF	8.57297e-18	-1.52155	0.035	0.622	4.79383e-13
CIAPIN1	non-TF	8.0379e-19	-1.52663	0.081	0.701	4.49463e-14
PPIA	non-TF	3.74471e-23	-1.52795	0.43	1	2.09396e-18		TRUE
ANKFN1	non-TF	4.17421e-20	-1.5303	0.105	0.771	2.33413e-15		TRUE
BTBD9	non-TF	2.64405e-19	-1.53296	0.023	0.647	1.4785e-14
RNF14	non-TF	9.4187e-18	-1.53338	0.012	0.582	5.26675e-13
BRIP1	non-TF	3.03913e-14	-1.53375	0.047	0.542	1.69942e-09
ATP5F1A	non-TF	7.0796e-22	-1.53418	0.43	0.925	3.95877e-17
GDE1	non-TF	1.22465e-18	-1.53489	0.047	0.657	6.84798e-14
KDM5B	non-TF	1.40668e-28	-1.53791	0.035	0.851	7.86588e-24		TRUE
ZNF207	TF	2.18103e-28	-1.53912	0.105	0.935	1.21959e-23
ARMC4	non-TF	1.87897e-22	-1.54091	0.163	0.9	1.05068e-17
RLIM	non-TF	1.95898e-16	-1.54178	0.047	0.602	1.09542e-11
KIT	non-TF	2.96038e-16	-1.54218	0	0.527	1.65538e-11		TRUE
MTFR1L	non-TF	4.11007e-20	-1.54354	0.081	0.726	2.29827e-15
EIF3F	non-TF	3.83233e-22	-1.54387	0.314	0.93	2.14296e-17
XPNPEP1	non-TF	9.0607e-23	-1.55284	0	0.677	5.06656e-18		TRUE
TEKT1	non-TF	7.76758e-22	-1.55349	0.337	0.945	4.34348e-17	TRUE
SLC25A36	non-TF	4.94422e-23	-1.5541	0.14	0.881	2.76471e-18
PARP6	non-TF	2.52515e-25	-1.55464	0.07	0.826	1.41201e-20
EMB	non-TF	3.09533e-22	-1.55759	0.012	0.687	1.73085e-17
DUSP14	non-TF	1.53231e-19	-1.55772	0.105	0.741	8.56836e-15
CTSD	non-TF	8.91818e-19	-1.55827	0.174	0.796	4.98687e-14		TRUE
OAZ2	non-TF	1.95387e-20	-1.56197	0.14	0.806	1.09257e-15
CKB	non-TF	4.2023e-20	-1.56436	0.233	0.9	2.34984e-15
PIK3R2	non-TF	2.38276e-19	-1.56761	0	0.602	1.33239e-14		TRUE
MFF	non-TF	1.12798e-19	-1.56955	0.081	0.716	6.30746e-15
CLN6	non-TF	4.19239e-20	-1.56967	0.012	0.632	2.3443e-15
FAM120A	non-TF	1.68897e-26	-1.57103	0.07	0.871	9.44438e-22
SLC7A4	non-TF	5.32506e-18	-1.57123	0.035	0.622	2.97767e-13
UACA	non-TF	4.50925e-26	-1.57201	0.012	0.756	2.52148e-21
SH3GL2	non-TF	4.94799e-18	-1.57855	0.035	0.612	2.76682e-13
XIRP2	non-TF	1.37662e-21	-1.58528	0.337	0.965	7.6978e-17	TRUE	TRUE
COPG1	non-TF	4.64312e-16	-1.58577	0	0.522	2.59634e-11
NAPA	non-TF	3.93632e-19	-1.58606	0.081	0.697	2.20111e-14
CCNL2	non-TF	4.04206e-23	-1.58874	0.023	0.731	2.26024e-18
CD82	non-TF	1.1362e-20	-1.59338	0.128	0.811	6.35338e-16		TRUE
PFKL	non-TF	1.24802e-18	-1.59604	0.012	0.607	6.97867e-14
DDHD2	non-TF	1.04325e-22	-1.59632	0.035	0.721	5.83367e-18
POU4F3	TF	1.82758e-21	-1.59664	0.349	0.935	1.02195e-16	TRUE
ATF7IP	non-TF	3.01087e-24	-1.59753	0.047	0.786	1.68362e-19
C9orf72	non-TF	2.32564e-16	-1.60062	0.012	0.547	1.30045e-11
PLEKHB1	non-TF	2.46781e-21	-1.60185	0.384	0.94	1.37995e-16
TMED2	non-TF	1.11218e-19	-1.60336	0.233	0.836	6.2191e-15
RIMKLB	non-TF	4.21308e-24	-1.60548	0.058	0.796	2.35587e-19
CCDC33	non-TF	8.69201e-15	-1.60968	0.186	0.701	4.8604e-10
CPE	non-TF	4.40558e-24	-1.61088	0.581	0.985	2.46351e-19	TRUE
HIF1A	TF	9.17328e-19	-1.6147	0.128	0.751	5.12952e-14		TRUE
ARHGAP44	non-TF	4.07692e-23	-1.61723	0.012	0.701	2.27973e-18
ATP5F1B	non-TF	5.23614e-22	-1.61999	0.43	0.94	2.92795e-17
PRR15	non-TF	2.20621e-23	-1.62064	0.233	0.97	1.23367e-18
PAFAH1B2	non-TF	9.39551e-21	-1.62144	0.116	0.781	5.25378e-16
LPIN2	non-TF	1.00362e-18	-1.62171	0.081	0.697	5.61207e-14
ZNF263	TF	1.89201e-19	-1.62311	0.023	0.642	1.05798e-14
ICA1	non-TF	3.30246e-22	-1.62383	0.07	0.761	1.84667e-17		TRUE
P4HB	non-TF	3e-21	-1.62779	0.105	0.766	1.67754e-16		TRUE
ZFAND5	non-TF	2.54555e-24	-1.63375	0.035	0.751	1.42342e-19
MICU3	non-TF	5.02115e-34	-1.63507	0.035	0.945	2.80773e-29
MAP1B	non-TF	6.65991e-21	-1.63523	0.64	0.965	3.72409e-16
FBXO36	non-TF	6.11993e-28	-1.639	0.035	0.821	3.42214e-23
TMEM30A	non-TF	4.37968e-21	-1.63979	0.07	0.736	2.44903e-16
EEF1G	non-TF	2.75901e-20	-1.65038	0.023	0.662	1.54278e-15
UGP2	non-TF	1.56013e-22	-1.65198	0.058	0.761	8.72391e-18
KIAA1024L	non-TF	1.02263e-24	-1.65613	0.267	0.975	5.71832e-20	TRUE
PEG3	TF	1.13198e-15	-1.65923	0	0.512	6.32979e-11
WDR35	non-TF	4.77554e-21	-1.66192	0.035	0.682	2.67039e-16
MAL2	non-TF	9.16681e-15	-1.66388	0.116	0.647	5.1259e-10
ATE1	non-TF	5.31015e-28	-1.66534	0.035	0.826	2.96933e-23
PJA1	non-TF	7.6129e-21	-1.66586	0.012	0.652	4.25698e-16
ANKRD24	non-TF	3.42982e-25	-1.66936	0.023	0.761	1.91788e-20
MLF1	non-TF	5.46165e-22	-1.6701	0.395	0.98	3.05405e-17	TRUE
HDAC3	non-TF	1.56352e-20	-1.67081	0.081	0.746	8.74292e-16		TRUE
TUBA1A	non-TF	8.18944e-29	-1.67248	0.837	0.995	4.57937e-24		TRUE
OGDH	non-TF	1.15967e-23	-1.68032	0.023	0.726	6.48466e-19		TRUE
LRRN1	non-TF	3.94137e-21	-1.68459	0	0.642	2.20394e-16
CCDC40	non-TF	2.56245e-24	-1.70182	0.116	0.866	1.43287e-19
MYSM1	TF	6.58737e-21	-1.7027	0.023	0.667	3.68352e-16
CYFIP2	non-TF	5.96216e-24	-1.70483	0.058	0.791	3.33392e-19
CNBP	TF	4.51211e-25	-1.70505	0.453	0.955	2.52308e-20
DALRD3	non-TF	6.55121e-26	-1.71018	0.058	0.816	3.66331e-21
ANO3	non-TF	2.61702e-23	-1.71277	0.035	0.736	1.46339e-18
AFAP1	non-TF	5.94258e-21	-1.71358	0.093	0.766	3.32297e-16
NME9	non-TF	1.39257e-21	-1.71482	0.035	0.711	7.78698e-17
UBA1	non-TF	1.60889e-22	-1.71493	0.186	0.856	8.9966e-18		TRUE
FSCN2	non-TF	3.13722e-21	-1.72367	0.093	0.761	1.75427e-16
C8orf37	non-TF	5.67638e-22	-1.72395	0.012	0.677	3.17412e-17
FKBP4	non-TF	1.08212e-24	-1.727	0.128	0.846	6.05099e-20		TRUE
MKRN2OS	non-TF	9.34903e-25	-1.73226	0.07	0.806	5.22779e-20
ASB8	non-TF	1.15497e-20	-1.73301	0.081	0.736	6.45836e-16
LAMP1	non-TF	5.96879e-25	-1.73815	0.116	0.861	3.33763e-20		TRUE
RAB18	non-TF	7.46059e-21	-1.73842	0.151	0.816	4.17181e-16
NBAS	non-TF	1.02555e-22	-1.74204	0.14	0.856	5.73467e-18
TOX	TF	1.13198e-15	-1.74593	0	0.512	6.32979e-11
CAB39L	non-TF	6.06188e-21	-1.75279	0.023	0.657	3.38968e-16
OTOF	non-TF	2.00521e-18	-1.75323	0.547	0.97	1.12127e-13	TRUE
SDHA	non-TF	2.93722e-21	-1.75905	0.116	0.776	1.64244e-16
NRXN3	non-TF	6.59714e-33	-1.75997	0.081	0.98	3.68899e-28
HMG20A	TF	3.37128e-23	-1.7603	0.035	0.741	1.88515e-18
AKIRIN1	non-TF	1.14787e-22	-1.76396	0.07	0.761	6.41868e-18
PDK3	non-TF	4.17101e-22	-1.76668	0.047	0.736	2.33235e-17		TRUE
TBCK	non-TF	2.55877e-20	-1.77371	0.012	0.637	1.43081e-15
KIAA1191	non-TF	3.88187e-27	-1.77643	0.128	0.905	2.17067e-22
NCEH1	non-TF	2.03491e-19	-1.78658	0.035	0.652	1.13788e-14
ORMDL3	non-TF	4.14081e-22	-1.7928	0.07	0.731	2.31546e-17
HIPK3	non-TF	6.63711e-22	-1.7954	0.105	0.776	3.71134e-17		TRUE
RAB36	non-TF	2.00919e-23	-1.79758	0.035	0.736	1.1235e-18
CA7	non-TF	1.0927e-12	-1.80966	0.093	0.557	6.11018e-08		TRUE
KIZ	non-TF	3.56425e-23	-1.81017	0.023	0.721	1.99306e-18
CCDC65	non-TF	4.30338e-24	-1.81234	0.128	0.851	2.40636e-19
CALM2	non-TF	9.74672e-28	-1.81758	0.988	1	5.45017e-23	TRUE
ARL6	non-TF	1.17316e-28	-1.82457	0.012	0.801	6.56008e-24
TJAP1	non-TF	1.57391e-25	-1.82607	0.279	0.96	8.80098e-21	TRUE
IDH3A	non-TF	2.77526e-22	-1.83771	0.105	0.796	1.55187e-17
GHITM	non-TF	1.24095e-25	-1.83925	0.465	0.96	6.93912e-21
TUBB4B	non-TF	1.1996e-26	-1.845	0.686	0.99	6.70791e-22		TRUE
TMOD1	non-TF	3.95817e-21	-1.85179	0.093	0.761	2.21333e-16
LYRM4	non-TF	3.59007e-32	-1.86165	0.093	0.95	2.0075e-27
DNMT3A	non-TF	1.20792e-33	-1.86579	0.047	0.94	6.75446e-29		TRUE
CFAP69	non-TF	6.94827e-31	-1.86663	0.07	0.925	3.88534e-26
GTF2I	TF	6.97978e-26	-1.87027	0.372	0.975	3.90296e-21
CFAP43	non-TF	3.73162e-28	-1.87171	0.14	0.94	2.08665e-23
LDHA	non-TF	1.95901e-22	-1.87282	0.128	0.811	1.09544e-17		TRUE
INPP4A	non-TF	4.15687e-33	-1.87575	0	0.866	2.32444e-28
TUBA1C	non-TF	2.0473e-41	-1.89172	0	0.99	1.14481e-36		TRUE
MCOLN3	non-TF	3.50033e-22	-1.90388	0.035	0.706	1.95732e-17		TRUE
LUC7L	non-TF	8.20943e-27	-1.90509	0.07	0.851	4.59055e-22
NEFL	non-TF	5.18933e-23	-1.90762	0.57	0.93	2.90177e-18	TRUE
TRIOBP	non-TF	1.23638e-28	-1.91575	0.14	0.94	6.91362e-24
SEC61A1	non-TF	5.34077e-30	-1.91684	0.058	0.876	2.98645e-25
DNAH6	non-TF	1.82714e-30	-1.92347	0.035	0.866	1.0217e-25
LZTFL1	non-TF	1.17138e-31	-1.9261	0.035	0.896	6.55012e-27
CLDN9	non-TF	2.19317e-25	-1.93847	0.233	0.92	1.22638e-20
CFAP20	non-TF	3.4717e-25	-1.93973	0.209	0.91	1.9413e-20
CBX3	non-TF	3.79608e-29	-1.95885	0.395	1	2.12269e-24
ELOF1	non-TF	1.15621e-32	-1.96027	0.07	0.935	6.46532e-28
SOCS3	non-TF	6.79664e-16	-1.9692	0.012	0.537	3.80054e-11		TRUE
CCDC6	non-TF	1.45432e-22	-1.97013	0.023	0.701	8.13224e-18
PEAK1	non-TF	1.21969e-25	-1.97362	0.093	0.841	6.82026e-21
CDKN2D	non-TF	9.79279e-26	-1.97485	0.163	0.896	5.47593e-21		TRUE
CCT7	non-TF	8.77959e-28	-1.9842	0.372	0.95	4.90937e-23
UBAP2L	non-TF	4.91595e-28	-1.9868	0.07	0.861	2.7489e-23
DNAI2	non-TF	4.18704e-27	-1.98966	0.023	0.781	2.34131e-22
NUDT3	non-TF	7.45422e-32	-1.9941	0.047	0.91	4.16825e-27
HIST3H2A	non-TF	4.65811e-32	-1.9949	0.023	0.886	2.60472e-27
MAT2A	non-TF	2.74908e-22	-1.99724	0.058	0.741	1.53723e-17		TRUE
HACD3	non-TF	2.49046e-23	-2.00462	0.244	0.876	1.39261e-18
EIF4A2	non-TF	1.57202e-28	-2.00791	0.419	0.965	8.79042e-24
ADIPOR1	non-TF	4.03926e-26	-2.01046	0.174	0.881	2.25867e-21
TTC21A	non-TF	1.63245e-32	-2.03566	0.093	0.965	9.12832e-28
NDRG3	non-TF	5.23137e-27	-2.0426	0.093	0.856	2.92528e-22
RRP1	non-TF	2.48425e-28	-2.04337	0.023	0.806	1.38914e-23
USP37	non-TF	1.51276e-26	-2.04491	0	0.751	8.45903e-22
LHFPL5	non-TF	1.76266e-25	-2.06878	0.012	0.746	9.85644e-21
ATP6V1B2	non-TF	3.45081e-25	-2.07379	0.14	0.851	1.92962e-20		TRUE
BCL2L1	non-TF	4.64605e-30	-2.07458	0.023	0.826	2.59798e-25		TRUE
SIRT2	non-TF	6.26957e-30	-2.09822	0.093	0.891	3.50582e-25		TRUE
C5orf15	non-TF	3.0243e-25	-2.10612	0	0.726	1.69113e-20
HSPA8	non-TF	3.08252e-34	-2.11116	0.64	1	1.72368e-29		TRUE
TOMM34	non-TF	5.49097e-27	-2.12219	0.047	0.821	3.07044e-22
DHRS3	non-TF	1.67088e-11	-2.12783	0.256	0.627	9.3432e-07
TTLL3	non-TF	1.54533e-28	-2.12963	0.035	0.826	8.64116e-24
UNC119B	non-TF	2.48946e-25	-2.14545	0.012	0.746	1.39206e-20
C1orf43	non-TF	4.2913e-31	-2.15137	0.174	0.955	2.39961e-26
OGT	non-TF	2.07484e-33	-2.15629	0.023	0.896	1.16021e-28
CCDC39	non-TF	6.83846e-37	-2.15724	0.023	0.955	3.82393e-32
SLC25A25	non-TF	4.54129e-23	-2.18063	0.047	0.731	2.5394e-18
PTP4A2	non-TF	3.62204e-32	-2.18164	0.116	0.96	2.02537e-27
TMEM250	non-TF	1.37428e-32	-2.19376	0.058	0.92	7.68469e-28
FBXO32	non-TF	1.86397e-26	-2.20157	0.128	0.881	1.04229e-21
ACTG1	non-TF	1.79539e-31	-2.2047	0.651	0.985	1.00395e-26		TRUE
TMTC4	non-TF	8.94742e-30	-2.20504	0.012	0.816	5.00322e-25
WDR1	non-TF	1.37617e-29	-2.21931	0.081	0.881	7.69528e-25
MRPS6	non-TF	2.11935e-32	-2.24194	0.36	1	1.1851e-27
SEMA6D	non-TF	1.88295e-20	-2.25928	0	0.627	1.05291e-15
NXF1	non-TF	6.19981e-37	-2.26484	0	0.925	3.46681e-32
GADD45G	non-TF	2.24385e-16	-2.29023	0.012	0.542	1.25472e-11		TRUE
WBP1	non-TF	1.35359e-32	-2.31115	0.035	0.9	7.569e-28
CFAP206	non-TF	3.25739e-32	-2.31168	0.035	0.886	1.82147e-27
LTBP1	non-TF	1.38471e-28	-2.31417	0.035	0.821	7.74301e-24
SLC25A4	non-TF	5.56098e-37	-2.33038	0.419	1	3.10959e-32		TRUE
TMEM170B	non-TF	1.64999e-28	-2.35351	0.012	0.806	9.22643e-24
KMT2D	non-TF	8.95711e-37	-2.37736	0.023	0.95	5.00864e-32		TRUE
RSRP1	non-TF	8.96798e-31	-2.38275	0.035	0.861	5.01471e-26
KNCN	non-TF	4.30646e-34	-2.39096	0.105	0.97	2.40809e-29
LAPTM4B	non-TF	1.16566e-27	-2.39668	0.07	0.831	6.51815e-23
VCL	non-TF	9.27957e-32	-2.40092	0.035	0.871	5.18895e-27
EEF2	non-TF	2.92453e-28	-2.44043	0.326	0.92	1.63534e-23		TRUE
LARS2	non-TF	3.88695e-42	-2.44132	0	1	2.17351e-37
NISCH	non-TF	4.48844e-33	-2.44235	0.105	0.95	2.50984e-28
NREP	non-TF	1.1486e-16	-2.46723	0.023	0.572	6.42277e-12
SDC4	non-TF	5.72947e-30	-2.46802	0.244	0.965	3.20381e-25
RAPH1	non-TF	1.32553e-36	-2.46986	0	0.92	7.41209e-32
UBASH3B	non-TF	6.00215e-35	-2.47974	0.047	0.945	3.35628e-30
GSN	non-TF	4.58234e-15	-2.49869	0.453	0.806	2.56236e-10
ACSS2	non-TF	6.69593e-30	-2.57639	0.035	0.851	3.74423e-25		TRUE
LGMN	non-TF	5.42172e-33	-2.58166	0.035	0.886	3.03172e-28		TRUE
CHRNA10	non-TF	2.95484e-33	-2.58481	0.093	0.93	1.65228e-28		TRUE
TMEM117	non-TF	5.14865e-26	-2.58545	0.023	0.756	2.87902e-21
RAB3IP	non-TF	2.83289e-31	-2.58814	0.209	0.935	1.58409e-26
GSTM2	non-TF	3.90527e-30	-2.65344	0	0.816	2.18375e-25
INAFM2	non-TF	8.7295e-36	-2.66922	0.023	0.93	4.88136e-31
ZWINT	non-TF	5.85032e-32	-2.67171	0.012	0.861	3.27138e-27
NEDD4	non-TF	1.88646e-34	-2.67345	0.012	0.896	1.05487e-29		TRUE
CFAP65	non-TF	4.58023e-38	-2.70141	0.035	0.98	2.56117e-33
APBA1	non-TF	2.59939e-31	-2.7317	0.256	0.96	1.45353e-26	TRUE	TRUE
SDCBP	non-TF	9.72719e-35	-2.75332	0.163	0.96	5.43925e-30
ADO	non-TF	4.34821e-33	-2.75638	0.012	0.876	2.43143e-28		TRUE
HSD17B7	non-TF	1.12202e-34	-2.89695	0.047	0.935	6.27411e-30
CCP110	non-TF	4.99494e-30	-2.91556	0.047	0.856	2.79307e-25
CFAP161	non-TF	4.15687e-33	-2.91818	0	0.866	2.32444e-28
ACTB	non-TF	6.53761e-39	-2.96503	0.407	1	3.6557e-34		TRUE
PSAT1	non-TF	2.27792e-19	-3.06254	0.012	0.612	1.27377e-14
PPM1H	non-TF	5.04984e-39	-3.09941	0.012	0.965	2.82377e-34
PTPRQ	non-TF	4.28427e-37	-3.14696	0.5	1	2.39568e-32	TRUE
RBM5	non-TF	9.2594e-37	-3.14983	0.081	0.955	5.17767e-32
NEFM	non-TF	1.83417e-34	-3.18119	0.163	0.955	1.02563e-29
ACBD7	non-TF	3.52435e-41	-3.19675	0.023	1	1.97075e-36
KCP	non-TF	7.90121e-35	-3.20163	0.14	0.95	4.4182e-30
C11orf87	non-TF	4.46551e-08	-3.26301	0.43	0.642	0.00249702	TRUE
RCN1	non-TF	1.01967e-36	-3.32429	0.012	0.93	5.70181e-32
GSK3B	non-TF	2.55508e-39	-3.3956	0.07	0.98	1.42875e-34		TRUE
GAS7	non-TF	7.99392e-22	-3.39776	0	0.657	4.47004e-17
CCER2	non-TF	1.45692e-29	-3.42062	0.058	0.866	8.14681e-25
YWHAZ	non-TF	6.83922e-40	-3.42175	0.198	0.99	3.82436e-35
CALML4	non-TF	7.61019e-41	-3.42412	0.058	1	4.25547e-36
ALDOA	non-TF	2.91502e-37	-3.49928	0.023	0.935	1.63002e-32
ANXA5	non-TF	5.42196e-40	-3.54114	0.384	0.995	3.03185e-35		TRUE
KCNA10	non-TF	3.2975e-32	-3.55451	0.035	0.876	1.8439e-27		TRUE
TSPAN12	non-TF	6.16481e-38	-3.57212	0	0.94	3.44724e-33
SLC5A3	non-TF	7.76249e-30	-3.63928	0.07	0.871	4.34063e-25		TRUE
PCDH20	non-TF	2.09981e-31	-3.71158	0.058	0.871	1.17417e-26
TWF1	non-TF	5.61174e-41	-3.82122	0.256	1	3.13797e-36
SPP1	non-TF	3.29889e-23	-7.68596	0.035	0.706	1.84467e-18		TRUE

## Sheet: Table S4. SC
Table S4. Differential expression analysis between human and mouse SC, Wilcoxon rank-sum test with a Bonferroni Padj < .05, log2 FC > |2|. Related to Figure 4f.
Transcription factors (TF) were detected using AnimalTFDB 3.0, druggable targets using DGIdb 4.0.
Gene	TF	p_val	avg_log2FC	pct.1	pct.2	p_val_adj	SC_enriched	Drug
S100A13	non-TF	3.09616e-73	5.17243	0.977	0.39	1.73131e-68
S100A6	non-TF	2.04868e-68	4.79196	0.938	0.088	1.14558e-63	TRUE
AGR2	non-TF	2.03413e-61	4.21463	0.884	0.044	1.13745e-56	TRUE
SNORC	non-TF	2.64734e-50	3.91982	0.784	0	1.48034e-45	TRUE
B2M	non-TF	9.15853e-63	3.8797	0.917	0.272	5.12127e-58	TRUE	TRUE
FBXO2	non-TF	3.88741e-77	3.79663	0.999	0.926	2.17376e-72	TRUE
IGFBP7	non-TF	1.43772e-51	3.68595	0.797	0.007	8.03943e-47	TRUE
GFAP	non-TF	1.47814e-40	3.30181	0.688	0	8.26547e-36	TRUE	TRUE
MALAT1	non-TF	6.73702e-59	3.27638	0.978	0.978	3.76721e-54		TRUE
ID1	TF	5.83752e-57	3.20753	0.906	0.478	3.26423e-52	TRUE
FXYD3	non-TF	1.8109e-49	3.17097	0.853	0.412	1.01262e-44	TRUE
S100A1	non-TF	8.65396e-75	3.1611	0.994	0.963	4.83912e-70
TSTD1	non-TF	8.02241e-41	3.05847	0.737	0.14	4.48597e-36
TCF7	TF	2.80295e-35	3.04198	0.659	0.059	1.56735e-30
FTH1	non-TF	9.83129e-76	2.945	0.995	0.941	5.49746e-71		TRUE
FKBP2	non-TF	1.72828e-39	2.92586	0.773	0.338	9.6642e-35
UQCRB	non-TF	7.9507e-50	2.88813	0.87	0.544	4.44587e-45		TRUE
SRP14	non-TF	2.26441e-61	2.85593	0.935	0.684	1.26621e-56
ATP5F1E	non-TF	4.34395e-46	2.77757	0.878	0.934	2.42905e-41		TRUE
EID1	non-TF	1.92076e-38	2.77229	0.72	0.14	1.07405e-33
CSRP2	non-TF	6.50468e-37	2.75214	0.666	0.037	3.63729e-32	TRUE
ATP5MC2	non-TF	3.55424e-33	2.72782	0.784	0.669	1.98746e-28
FXYD6	non-TF	1.95541e-35	2.6506	0.636	0.007	1.09343e-30	TRUE
TOMM7	non-TF	2.49521e-34	2.65013	0.798	0.721	1.39527e-29
TMA7	non-TF	2.74612e-43	2.64933	0.853	0.743	1.53557e-38
COX6A1	non-TF	3.35157e-34	2.63831	0.786	0.64	1.87413e-29
HINT1	non-TF	2.37317e-37	2.63647	0.765	0.368	1.32703e-32		TRUE
SOX2	TF	2.48341e-28	2.6007	0.638	0.191	1.38867e-23	TRUE
ARL6IP5	non-TF	4.58923e-38	2.58995	0.776	0.39	2.56621e-33
SVIP	non-TF	4.46172e-32	2.54885	0.699	0.228	2.4949e-27	TRUE
PTMA	non-TF	1.86074e-69	2.53889	0.978	0.993	1.04049e-64	TRUE	TRUE
DUT	non-TF	2.02917e-35	2.53601	0.715	0.206	1.13467e-30		TRUE
SELENOM	non-TF	2.60385e-37	2.51823	0.815	0.699	1.45602e-32
C4orf48	non-TF	5.34733e-25	2.50541	0.66	0.36	2.99012e-20	TRUE
SERF2	non-TF	6.91897e-59	2.50282	0.94	0.949	3.86895e-54
PAQR6	non-TF	9.72167e-43	2.48827	0.83	0.338	5.43616e-38	TRUE
SEC62	non-TF	1.23038e-37	2.4617	0.833	0.721	6.88003e-33
NDUFB2	non-TF	1.84794e-30	2.44473	0.736	0.478	1.03333e-25		TRUE
COX7C	non-TF	4.39369e-31	2.44435	0.804	0.926	2.45687e-26
CCNI	non-TF	9.00782e-30	2.41112	0.702	0.316	5.03699e-25
TMEM205	non-TF	2.66599e-28	2.41074	0.645	0.206	1.49077e-23
TIMP1	non-TF	1.27503e-29	2.4083	0.579	0.029	7.12971e-25
CMYA5	non-TF	1.18217e-29	2.40804	0.561	0	6.61045e-25	TRUE
NUCKS1	non-TF	8.79406e-28	2.36837	0.669	0.25	4.91746e-23
KRT19	non-TF	8.02059e-25	2.36583	0.495	0	4.48496e-20	TRUE	TRUE
PCSK1N	non-TF	3.52187e-28	2.35175	0.546	0.007	1.96936e-23
JUND	TF	1.82389e-21	2.34306	0.568	0.206	1.01988e-16		TRUE
UBL5	non-TF	1.0541e-29	2.32106	0.786	0.838	5.89431e-25
ATP5ME	non-TF	8.76686e-15	2.32046	0.644	0.669	4.90225e-10
METRN	non-TF	1.84678e-25	2.31791	0.622	0.206	1.03268e-20
ID4	TF	5.68521e-29	2.31286	0.666	0.199	3.17906e-24	TRUE
TPD52L1	non-TF	1.1286e-28	2.28825	0.593	0.066	6.3109e-24	TRUE
FAM107A	non-TF	7.42763e-41	2.2815	0.861	0.735	4.15338e-36	TRUE
CLU	non-TF	1.73005e-26	2.25291	0.571	0.059	9.67412e-22	TRUE	TRUE
UQCRQ	non-TF	3.2871e-25	2.24236	0.747	0.743	1.83808e-20
STMN1	non-TF	1.19172e-24	2.21826	0.622	0.221	6.66384e-20	TRUE	TRUE
CSTB	non-TF	8.46892e-25	2.21673	0.681	0.426	4.73565e-20
CAMTA1	TF	6.30162e-21	2.19921	0.595	0.279	3.52374e-16
SRP9	non-TF	3.75289e-30	2.19885	0.782	0.699	2.09854e-25	TRUE
EPHX1	non-TF	3.83709e-26	2.18895	0.572	0.081	2.14562e-21	TRUE	TRUE
AURKAIP1	non-TF	2.17099e-24	2.1457	0.641	0.294	1.21397e-19
EEF1D	non-TF	5.65843e-33	2.13562	0.765	0.463	3.16408e-28	TRUE
POLR2F	non-TF	3.06636e-21	2.11424	0.611	0.316	1.71465e-16
PLCG2	non-TF	3.77032e-24	2.10049	0.485	0	2.10829e-19		TRUE
NDUFS5	non-TF	8.01655e-17	2.06305	0.626	0.507	4.48269e-12		TRUE
VIM	non-TF	2.37394e-29	2.05863	0.751	0.404	1.32746e-24	TRUE	TRUE
UQCR10	non-TF	3.43765e-15	2.04563	0.632	0.588	1.92226e-10		TRUE
OST4	non-TF	5.6274e-29	2.04039	0.773	0.721	3.14673e-24
NDUFC1	non-TF	3.54172e-16	2.0376	0.66	0.669	1.98046e-11		TRUE
LAMTOR4	non-TF	1.13391e-15	2.03661	0.562	0.346	6.34062e-11
COPS9	non-TF	8.51487e-19	2.03457	0.672	0.61	4.76135e-14
HSP90AA1	non-TF	7.12878e-29	2.00701	0.779	0.544	3.98627e-24		TRUE
LMO4	non-TF	2.32875e-18	2.00684	0.539	0.199	1.30219e-13
KTN1	non-TF	3.22657e-19	2.00098	0.671	0.522	1.80424e-14
DYNLL1	non-TF	2.2712e-20	2.00094	0.609	0.316	1.27001e-15
KRT10	non-TF	2.99252e-21	1.99748	0.505	0.088	1.67336e-16		TRUE
ELOB	non-TF	3.17247e-24	1.98486	0.769	0.882	1.77398e-19
ROMO1	non-TF	3.41826e-10	1.90812	0.565	0.551	1.91142e-05	TRUE
BLOC1S1	non-TF	1.34476e-16	1.89796	0.62	0.463	7.51964e-12
BRI3	non-TF	5.26907e-16	1.88795	0.477	0.162	2.94636e-11
NDUFC2	non-TF	2.62051e-18	1.87931	0.652	0.485	1.46534e-13		TRUE
FAU	non-TF	4.67082e-50	1.87464	0.927	0.993	2.61183e-45
POLR2I	non-TF	2.66316e-15	1.83444	0.494	0.206	1.48919e-10
COMMD6	non-TF	5.33123e-17	1.78286	0.603	0.375	2.98112e-12
BEX3	non-TF	1.11725e-23	1.77627	0.744	0.676	6.24744e-19
CUTA	non-TF	3.8727e-11	1.76661	0.532	0.412	2.16554e-06
TMEM14A	non-TF	8.30258e-19	1.76482	0.498	0.11	4.64264e-14	TRUE
PTMS	non-TF	1.23925e-08	1.76308	0.54	0.529	0.000692966	TRUE
CD63	non-TF	5.63068e-38	1.75181	0.881	0.772	3.14856e-33	TRUE	TRUE
TBCA	non-TF	6.23853e-14	1.73913	0.617	0.507	3.48846e-09
BTG3	non-TF	1.49269e-16	1.73884	0.417	0.059	8.34682e-12	TRUE
SPHK1	non-TF	3.30044e-15	1.73426	0.476	0.154	1.84554e-10	TRUE	TRUE
TMEM258	non-TF	9.1469e-13	1.73321	0.656	0.765	5.11477e-08
SNRPG	non-TF	3.5047e-08	1.72234	0.57	0.632	0.00195976
PARK7	non-TF	1.44564e-28	1.71992	0.779	0.625	8.08375e-24
DPP7	non-TF	2.9404e-19	1.71675	0.491	0.074	1.64421e-14		TRUE
COX17	non-TF	1.13412e-10	1.71149	0.561	0.485	6.34179e-06
COX7A1	non-TF	2.60193e-13	1.70494	0.386	0.088	1.45495e-08	TRUE
MSRB2	non-TF	4.57442e-17	1.70472	0.474	0.118	2.55792e-12
SRSF9	non-TF	2.73288e-17	1.70434	0.496	0.14	1.52817e-12
ATP5IF1	non-TF	1.13181e-14	1.70379	0.65	0.632	6.32888e-10
NDUFB7	non-TF	6.27598e-14	1.69224	0.573	0.412	3.5094e-09		TRUE
WDR83OS	non-TF	1.21082e-12	1.69139	0.506	0.294	6.77064e-08
ZNF428	non-TF	5.26389e-16	1.67113	0.444	0.103	2.94346e-11
NDUFA4	non-TF	1.57137e-30	1.66628	0.836	0.904	8.78676e-26		TRUE
ATP6V0E1	non-TF	2.09408e-29	1.66229	0.811	0.699	1.17097e-24	TRUE
EIF1	non-TF	1.09452e-46	1.66217	0.918	0.985	6.12033e-42
SPCS1	non-TF	5.55431e-24	1.66127	0.747	0.603	3.10586e-19
H1FX	non-TF	3.0123e-17	1.65635	0.389	0.015	1.68442e-12
UQCR11	non-TF	3.19859e-11	1.65599	0.631	0.728	1.78859e-06
CXCL14	non-TF	7.27473e-08	1.65584	0.213	0.022	0.00406788
SUDS3	non-TF	1.83092e-17	1.65149	0.443	0.059	1.02382e-12
VPS28	non-TF	1.44893e-18	1.64419	0.397	0	8.10214e-14
DMAC1	non-TF	2.04683e-13	1.64394	0.434	0.147	1.14454e-08
NDUFAF3	non-TF	1.17224e-15	1.63265	0.489	0.162	6.55492e-11		TRUE
ECHS1	non-TF	2.3664e-18	1.62814	0.59	0.265	1.32325e-13
PEBP4	non-TF	1.4311e-17	1.6233	0.38	0	8.00241e-13	TRUE	TRUE
PLP1	non-TF	9.07542e-17	1.62281	0.392	0.022	5.0748e-12	TRUE
OTOL1	non-TF	2.23692e-16	1.62193	0.786	0.919	1.25084e-11	TRUE
SLC3A2	non-TF	4.25663e-17	1.61987	0.628	0.39	2.38022e-12	TRUE	TRUE
SMPX	non-TF	3.71452e-16	1.6172	0.397	0.037	2.07709e-11
FAM69C	non-TF	2.59395e-17	1.61515	0.457	0.074	1.45049e-12	TRUE
SSR4	non-TF	8.73236e-19	1.61033	0.691	0.551	4.88296e-14
SOD1	non-TF	4.9332e-29	1.60835	0.815	0.868	2.75855e-24		TRUE
GADD45GIP1	non-TF	2.04821e-14	1.60216	0.394	0.074	1.14532e-09
HEBP2	non-TF	1.33421e-15	1.60074	0.473	0.125	7.46061e-11
HMGB1	TF	5.13014e-27	1.59411	0.813	0.86	2.86867e-22		TRUE
ERLEC1	non-TF	7.42334e-13	1.58795	0.562	0.382	4.15099e-08
MRPL20	non-TF	2.86488e-13	1.58303	0.539	0.324	1.60198e-08
DCXR	non-TF	8.43916e-16	1.57955	0.468	0.132	4.71901e-11
VEGFB	non-TF	4.21725e-13	1.57848	0.41	0.118	2.3582e-08	TRUE	TRUE
PTN	non-TF	4.91882e-31	1.57722	0.902	0.904	2.7505e-26	TRUE
RTN4	non-TF	1.50473e-13	1.56458	0.572	0.353	8.41415e-09		TRUE
PFDN5	non-TF	2.67243e-27	1.55019	0.807	0.853	1.49437e-22
CTHRC1	non-TF	2.28741e-19	1.54051	0.682	0.368	1.27908e-14	TRUE
MGP	non-TF	7.22317e-11	1.5387	0.262	0.007	4.03905e-06
COX5B	non-TF	1.95232e-14	1.5353	0.689	0.794	1.0917e-09
SEC11C	non-TF	8.00394e-18	1.53185	0.666	0.456	4.47564e-13
IVD	non-TF	7.76711e-14	1.52332	0.441	0.125	4.34321e-09
SELENOW	non-TF	6.5645e-10	1.51937	0.652	0.868	3.67074e-05
WFDC2	non-TF	1.80267e-13	1.51719	0.628	0.507	1.00802e-08
ALKBH7	non-TF	4.68436e-16	1.51159	0.385	0.029	2.6194e-11
TRMT112	non-TF	3.43877e-09	1.49848	0.458	0.301	0.000192289
CEBPD	TF	3.48032e-09	1.49308	0.484	0.294	0.000194613	TRUE
PPDPF	non-TF	8.36233e-10	1.49061	0.571	0.537	4.67605e-05
MYL6B	non-TF	4.26691e-16	1.4889	0.37	0.015	2.38597e-11
LYPD1	non-TF	1.13626e-14	1.48657	0.369	0.037	6.35372e-10	TRUE
XRCC5	non-TF	3.17734e-13	1.48437	0.444	0.14	1.7767e-08		TRUE
EAPP	non-TF	2.20742e-12	1.48419	0.504	0.257	1.23434e-07
NDUFA12	non-TF	2.76885e-07	1.48138	0.573	0.676	0.0154828		TRUE
MRPL51	non-TF	8.52882e-11	1.47556	0.469	0.25	4.76915e-06
ARPC3	non-TF	1.25658e-12	1.47162	0.411	0.118	7.02653e-08
SNRPN	non-TF	7.04587e-15	1.46996	0.568	0.279	3.93991e-10
GNAS	non-TF	2.29189e-23	1.46223	0.784	0.699	1.28158e-18	TRUE	TRUE
S100A10	non-TF	1.79222e-19	1.46212	0.748	0.735	1.00217e-14	TRUE	TRUE
SKP1	non-TF	4.40655e-61	1.462	0.996	0.985	2.46406e-56
HABP4	non-TF	2.50685e-14	1.45773	0.373	0.044	1.40178e-09
SPCS2	non-TF	4.47635e-23	1.45321	0.78	0.676	2.50308e-18	TRUE
UXT	non-TF	1.24489e-12	1.45318	0.367	0.074	6.96118e-08
ISCU	non-TF	2.16297e-11	1.44992	0.564	0.419	1.20949e-06
BSPRY	non-TF	2.82861e-14	1.44893	0.366	0.037	1.5817e-09
DHX36	non-TF	2.66087e-11	1.4422	0.34	0.074	1.4879e-06		TRUE
DSTYK	non-TF	3.28219e-13	1.44034	0.397	0.081	1.83534e-08	TRUE
HERPUD1	non-TF	3.64316e-16	1.42908	0.677	0.449	2.03718e-11	TRUE
BANF1	non-TF	2.19271e-07	1.42886	0.474	0.382	0.0122612
COX7A2	non-TF	3.14388e-09	1.42817	0.638	0.787	0.000175799
GUK1	non-TF	2.54925e-12	1.4275	0.539	0.301	1.42549e-07
MLEC	non-TF	5.89946e-13	1.42632	0.54	0.272	3.29886e-08
RABAC1	non-TF	9.31488e-15	1.42217	0.653	0.574	5.2087e-10
BTF3	non-TF	4.48074e-19	1.42148	0.746	0.757	2.50554e-14
MAP3K13	non-TF	1.72139e-14	1.41944	0.357	0.029	9.62565e-10		TRUE
PNKD	non-TF	4.17482e-12	1.41745	0.59	0.449	2.33447e-07	TRUE
DDIT4	non-TF	3.29887e-08	1.41164	0.323	0.125	0.00184466		TRUE
CALD1	non-TF	5.39762e-13	1.40799	0.406	0.103	3.01824e-08	TRUE
MPHOSPH8	non-TF	1.51982e-09	1.40341	0.435	0.235	8.49853e-05		TRUE
LSM3	non-TF	1.17417e-08	1.40181	0.405	0.213	0.000656574
SEM1	non-TF	1.48932e-07	1.38555	0.619	0.824	0.008328		TRUE
NME4	non-TF	1.72241e-13	1.38184	0.329	0.022	9.63137e-09
LGALS3BP	non-TF	1.19477e-14	1.38042	0.368	0.029	6.68091e-10
MRPL57	non-TF	5.86206e-08	1.36814	0.429	0.279	0.00327794
TMSB4X	non-TF	1.60181e-11	1.36685	0.669	0.706	8.95702e-07	TRUE
PYURF	non-TF	2.01466e-10	1.35722	0.443	0.206	1.12656e-05
XPA	TF	9.88015e-12	1.35536	0.411	0.125	5.52478e-07		TRUE
SAT2	non-TF	3.90265e-13	1.35517	0.412	0.103	2.18228e-08
NFIC	TF	5.57976e-07	1.35444	0.509	0.434	0.0312009
NUCB2	non-TF	1.96212e-11	1.35363	0.512	0.265	1.09718e-06		TRUE
LRMDA	non-TF	5.48785e-14	1.3474	0.314	0	3.0687e-09		TRUE
HNRNPD	non-TF	3.70622e-11	1.34532	0.392	0.125	2.07244e-06
NAA38	non-TF	6.04877e-08	1.34325	0.441	0.294	0.00338235
NAP1L1	non-TF	1.38817e-07	1.3431	0.518	0.441	0.00776239
TSR2	non-TF	1.48122e-11	1.34268	0.377	0.096	8.28267e-07
GABARAPL2	non-TF	1.83913e-19	1.34203	0.751	0.662	1.02841e-14
SPATS2L	non-TF	4.92029e-11	1.33368	0.588	0.426	2.75133e-06	TRUE
C1orf122	non-TF	3.28446e-11	1.32846	0.39	0.125	1.83661e-06
TUBB2B	non-TF	1.52303e-10	1.32719	0.439	0.176	8.51651e-06	TRUE	TRUE
MIEN1	non-TF	1.06608e-07	1.32438	0.445	0.309	0.0059613
RSBN1L	non-TF	3.94095e-07	1.32426	0.344	0.176	0.022037
ARL6IP4	non-TF	1.70433e-09	1.32114	0.461	0.272	9.53025e-05
MRPL41	non-TF	9.91796e-08	1.30899	0.406	0.243	0.00554593
RASGRP1	non-TF	2.54396e-10	1.3066	0.325	0.074	1.42253e-05	TRUE	TRUE
LAPTM4A	non-TF	1.41037e-18	1.30266	0.79	0.846	7.88649e-14
MRPS18C	non-TF	6.52202e-07	1.29977	0.401	0.265	0.0364698
PIN4	non-TF	1.92106e-07	1.28427	0.333	0.154	0.0107422
PRDX1	non-TF	1.02107e-44	1.28272	0.969	0.971	5.70962e-40		TRUE
ATP5PO	non-TF	4.60301e-09	1.27276	0.583	0.581	0.000257391
RACK1	non-TF	4.82616e-17	1.26631	0.711	0.537	2.69869e-12
NDUFA1	non-TF	1.40208e-11	1.26443	0.691	0.86	7.84013e-07		TRUE
PLPP2	non-TF	6.44687e-09	1.26039	0.535	0.397	0.000360496	TRUE
NDUFB10	non-TF	1.04757e-07	1.25868	0.555	0.544	0.00585779		TRUE
TMEM179B	non-TF	3.05033e-13	1.2533	0.3	0	1.70569e-08
TSPO	non-TF	4.08578e-09	1.25217	0.467	0.265	0.000228469		TRUE
PSME1	non-TF	1.70629e-09	1.25192	0.449	0.221	9.54124e-05		TRUE
FMC1	non-TF	1.58871e-07	1.24457	0.317	0.132	0.00888373
ANAPC16	non-TF	4.91366e-07	1.24241	0.423	0.272	0.0274762
UFC1	non-TF	4.50436e-09	1.24225	0.498	0.316	0.000251875
IRX3	TF	1.62799e-12	1.24104	0.285	0	9.10341e-08	TRUE
ARL2	non-TF	2.0202e-09	1.2408	0.476	0.265	0.000112965
EPN2	non-TF	3.5497e-09	1.2253	0.358	0.132	0.000198492
SUB1	TF	5.70767e-10	1.21872	0.627	0.61	3.19162e-05
UBXN4	non-TF	2.60644e-07	1.21484	0.535	0.441	0.0145747
SSB	non-TF	3.42411e-08	1.2143	0.546	0.434	0.00191469
ARL4C	non-TF	2.32921e-07	1.2099	0.396	0.213	0.0130245	TRUE
MXI1	TF	4.12393e-11	1.20962	0.468	0.176	2.30602e-06	TRUE	TRUE
LYRM2	non-TF	5.68675e-08	1.20761	0.356	0.162	0.00317991
BRK1	non-TF	7.27851e-08	1.20374	0.462	0.294	0.00407
TPGS2	non-TF	1.49285e-08	1.20039	0.373	0.154	0.000834774
SCG5	non-TF	8.62626e-09	1.19903	0.476	0.272	0.000482363		TRUE
TMEM219	non-TF	7.96944e-10	1.19717	0.358	0.11	4.45635e-05
FDPS	non-TF	4.00709e-09	1.19422	0.438	0.213	0.000224068		TRUE
DNPH1	non-TF	2.35638e-12	1.18565	0.3	0.015	1.31764e-07
DMKN	non-TF	1.08079e-11	1.18506	0.278	0.007	6.04356e-07
MYL6	non-TF	4.26723e-16	1.18385	0.749	0.772	2.38615e-11
RAB13	non-TF	1.312e-09	1.18379	0.339	0.088	7.33644e-05
SNHG9	non-TF	6.80409e-07	1.18322	0.284	0.11	0.0380471
GTF3C6	non-TF	7.21308e-08	1.18284	0.455	0.279	0.00403341
CLEC11A	non-TF	2.6606e-11	1.17893	0.324	0.051	1.48775e-06
S100B	non-TF	4.79099e-08	1.17593	0.658	0.691	0.00267903	TRUE	TRUE
GSTO1	non-TF	3.94551e-10	1.17044	0.312	0.059	2.20625e-05		TRUE
ATP5PF	non-TF	1.08715e-07	1.16021	0.644	0.831	0.00607915
TMBIM6	non-TF	6.92627e-17	1.1556	0.757	0.64	3.87303e-12	TRUE
SMIM26	non-TF	2.72499e-08	1.14057	0.289	0.081	0.00152376
CTSF	non-TF	1.79297e-10	1.12816	0.51	0.243	1.00259e-05		TRUE
MRPL40	non-TF	1.48176e-08	1.12703	0.454	0.25	0.000828573
TSPAN18	non-TF	9.87288e-09	1.12528	0.286	0.066	0.000552072
TBX2	TF	2.40313e-07	1.11893	0.399	0.206	0.0134378		TRUE
MXRA7	non-TF	7.3604e-08	1.11605	0.306	0.103	0.00411579	TRUE
CHMP4C	non-TF	1.65298e-09	1.11555	0.32	0.074	9.24314e-05
LBH	non-TF	1.65966e-08	1.11552	0.269	0.059	0.00092805
JPX	non-TF	2.96836e-10	1.11513	0.267	0.022	1.65985e-05
RETREG1	non-TF	9.0381e-08	1.11161	0.317	0.11	0.00505393
CHCHD5	non-TF	3.89032e-08	1.10717	0.336	0.118	0.00217539
C1orf54	non-TF	5.19691e-12	1.10348	0.286	0.007	2.90601e-07
SH3BGR	non-TF	3.33073e-09	1.10026	0.253	0.029	0.000186248
CIRBP	non-TF	3.36922e-13	1.09262	0.738	0.801	1.884e-08
CD99	non-TF	1.86463e-11	1.08933	0.263	0	1.04266e-06	TRUE
TPT1	non-TF	2.1461e-23	1.08503	0.858	0.963	1.20006e-18		TRUE
SURF1	non-TF	1.36384e-07	1.07519	0.353	0.147	0.00762635
MTIF3	non-TF	2.65077e-08	1.0729	0.296	0.081	0.00148225
ALDH2	non-TF	1.44717e-08	1.06835	0.512	0.324	0.00080923	TRUE	TRUE
LSM5	non-TF	4.46336e-07	1.06488	0.269	0.088	0.0249582
MRPS34	non-TF	2.16186e-07	1.06373	0.329	0.132	0.0120887
COPRS	non-TF	1.56093e-09	1.05496	0.312	0.066	8.7284e-05
TBCB	non-TF	1.15006e-07	1.04675	0.476	0.294	0.00643088
C19orf81	non-TF	9.31245e-10	1.04625	0.254	0.022	5.20734e-05
MDK	non-TF	2.63701e-08	1.04067	0.617	0.551	0.00147456	TRUE	TRUE
C12orf65	non-TF	2.26462e-08	1.02602	0.287	0.066	0.00126633
MDM1	non-TF	3.56128e-07	1.02154	0.237	0.051	0.019914
ATP6V1G1	non-TF	2.12982e-13	1.01934	0.756	0.809	1.19096e-08
HTATIP2	non-TF	4.5624e-10	1.01868	0.301	0.044	2.5512e-05
ABHD14A	non-TF	6.03092e-08	1.01746	0.298	0.088	0.00337237
RAB2A	non-TF	4.49052e-07	1.0172	0.445	0.265	0.0251101
SYNC	non-TF	4.50521e-09	1.01556	0.21	0	0.000251922
DDX18	non-TF	2.28567e-07	1.01377	0.26	0.074	0.012781
GYPC	non-TF	1.87127e-10	1.01329	0.257	0.007	1.04638e-05
DNAJC21	non-TF	6.46373e-08	1.00587	0.214	0.022	0.00361439
SEPT7	non-TF	3.33209e-10	1.00151	0.66	0.574	1.86324e-05
ANAPC5	non-TF	4.63056e-19	-1.00289	0.158	0.478	2.58932e-14
PFAS	non-TF	2.10707e-80	-1.0033	0.006	0.456	1.17823e-75
CSNK1G1	non-TF	3.05465e-55	-1.00337	0.017	0.39	1.7081e-50		TRUE
SAR1A	non-TF	3.19733e-16	-1.00357	0.177	0.478	1.78788e-11
ABHD12	non-TF	5.51527e-23	-1.00391	0.09	0.397	3.08403e-18		TRUE
CHSY1	non-TF	3.48819e-88	-1.00562	0.02	0.574	1.95053e-83
ATP5F1A	non-TF	1.70938e-19	-1.00614	0.399	0.787	9.55853e-15
GLMP	TF	7.19225e-21	-1.0086	0.117	0.434	4.02176e-16
MICU3	non-TF	1.20763e-76	-1.00861	0.075	0.735	6.75281e-72
FBXL4	non-TF	3.18821e-48	-1.00867	0.016	0.346	1.78278e-43
ZNF260	TF	1.38828e-41	-1.00922	0.026	0.353	7.76298e-37
FADS2	non-TF	3.68788e-78	-1.00999	0.018	0.515	2.06219e-73
CNNM4	non-TF	7.62057e-46	-1.01032	0.009	0.294	4.26127e-41
LSR	non-TF	1.08103e-21	-1.01342	0.09	0.382	6.04488e-17
TUBB	non-TF	6.63857e-15	-1.01499	0.337	0.691	3.71216e-10		TRUE
PHGDH	non-TF	3.26945e-19	-1.01549	0.142	0.463	1.82821e-14
PPT1	non-TF	1.38185e-19	-1.01871	0.224	0.596	7.72705e-15		TRUE
MAEA	non-TF	7.13313e-42	-1.01891	0.034	0.382	3.9887e-37
CHST2	non-TF	2.18164e-42	-1.01933	0.011	0.287	1.21993e-37
CCP110	non-TF	2.43416e-26	-1.02207	0.026	0.257	1.36113e-21
PPM1H	non-TF	9.7735e-52	-1.02377	0.028	0.419	5.46514e-47
CAPZA2	non-TF	6.33378e-22	-1.02386	0.152	0.507	3.54173e-17
ZFP36	non-TF	1.65637e-74	-1.0241	0.084	0.765	9.26206e-70
KLHL9	non-TF	4.31615e-77	-1.02598	0.027	0.551	2.41351e-72
PEG3	TF	8.28905e-48	-1.02725	0.01	0.309	4.63507e-43
PTBP1	non-TF	5.09138e-34	-1.02735	0.148	0.625	2.847e-29		TRUE
FTO	non-TF	1.70947e-31	-1.02771	0.044	0.346	9.55903e-27		TRUE
IP6K1	non-TF	2.3964e-37	-1.02806	0.028	0.331	1.34002e-32
SLC15A2	non-TF	1.42115e-40	-1.02838	0.035	0.375	7.94681e-36		TRUE
EGFR	non-TF	1.015e-48	-1.02847	0.095	0.625	5.67567e-44		TRUE
TSPAN15	non-TF	5.44526e-27	-1.02938	0.073	0.397	3.04488e-22
FNTA	non-TF	8.48674e-20	-1.02968	0.079	0.346	4.74562e-15		TRUE
FAM129B	non-TF	9.37072e-39	-1.02983	0.038	0.375	5.23992e-34
PTPRS	non-TF	5.53938e-80	-1.03101	0.006	0.456	3.09751e-75		TRUE
HUWE1	non-TF	3.77436e-33	-1.03571	0.131	0.581	2.11055e-28
VMP1	non-TF	2.94045e-39	-1.03658	0.092	0.537	1.64424e-34
RCHY1	non-TF	7.049e-27	-1.03779	0.066	0.375	3.94166e-22
CCNT2	non-TF	2.42223e-50	-1.0378	0.048	0.485	1.35446e-45
IRF6	TF	1.24549e-22	-1.03938	0.155	0.522	6.96454e-18		TRUE
SLC35F5	non-TF	9.69861e-55	-1.04001	0.018	0.39	5.42327e-50
SLC44A2	non-TF	4.42111e-21	-1.04046	0.235	0.618	2.4722e-16
COPA	non-TF	2.88008e-40	-1.04248	0.066	0.478	1.61048e-35
POLDIP3	non-TF	1.12546e-44	-1.04349	0.07	0.515	6.29333e-40
NKTR	non-TF	7.23111e-28	-1.04529	0.188	0.632	4.04349e-23
ITM2C	non-TF	1.4071e-19	-1.04666	0.422	0.86	7.86822e-15	TRUE
CLK3	non-TF	2.72795e-37	-1.0498	0.062	0.441	1.52542e-32		TRUE
GPC6	non-TF	6.17941e-33	-1.05001	0.089	0.485	3.4554e-28
C1orf198	non-TF	2.25128e-80	-1.05074	0.016	0.515	1.25887e-75
ATF4	TF	1.98687e-27	-1.0525	0.115	0.485	1.11102e-22		TRUE
UBR1	non-TF	3.22116e-46	-1.05346	0.022	0.36	1.80121e-41		TRUE
ARAF	non-TF	2.24319e-53	-1.05469	0.037	0.463	1.25435e-48		TRUE
PTPRF	non-TF	2.19049e-43	-1.05529	0.164	0.735	1.22488e-38		TRUE
NRCAM	non-TF	2.70026e-24	-1.05633	0.148	0.529	1.50993e-19
NELFB	non-TF	8.12156e-35	-1.05644	0.044	0.368	4.54141e-30
TCN2	non-TF	1.78516e-30	-1.05767	0.024	0.272	9.98227e-26
PFKL	non-TF	7.73048e-31	-1.05847	0.104	0.493	4.32273e-26
PRSS8	non-TF	6.93988e-29	-1.06125	0.044	0.331	3.88064e-24		TRUE
SLC25A25	non-TF	1.63452e-15	-1.06193	0.098	0.346	9.13989e-11
ERRFI1	non-TF	1.73264e-27	-1.06287	0.141	0.551	9.6886e-23		TRUE
TRIL	non-TF	1.38186e-57	-1.06521	0.029	0.456	7.72707e-53
PNRC2	non-TF	8.15979e-37	-1.06581	0.054	0.412	4.56279e-32
PEA15	non-TF	4.64013e-55	-1.06852	0.072	0.603	2.59467e-50
NUP98	non-TF	2.43187e-85	-1.07057	0.043	0.669	1.35986e-80
ARID5A	TF	2.65773e-58	-1.071	0.009	0.36	1.48615e-53
CANX	non-TF	1.95223e-21	-1.07205	0.516	0.897	1.09165e-16	TRUE	TRUE
VPS25	non-TF	3.44405e-38	-1.07513	0.122	0.581	1.92585e-33
RBBP7	non-TF	4.21865e-22	-1.07601	0.189	0.566	2.35899e-17
CKAP5	non-TF	5.09204e-50	-1.07635	0.038	0.449	2.84737e-45
RTN3	non-TF	1.06402e-24	-1.0782	0.23	0.654	5.94976e-20
EIF4H	non-TF	1.65618e-24	-1.0786	0.246	0.669	9.26103e-20		TRUE
COPB1	non-TF	1.10594e-19	-1.0814	0.116	0.426	6.1842e-15
GPLD1	non-TF	1.14709e-51	-1.0817	0.012	0.346	6.41432e-47
NDUFA7	non-TF	1.28024e-94	-1.08201	0.05	0.743	7.15887e-90		TRUE
MKLN1	non-TF	2.78361e-40	-1.08241	0.068	0.485	1.55654e-35
PDPN	non-TF	1.70318e-88	-1.08302	0.009	0.515	9.52383e-84
GAS7	non-TF	2.35431e-24	-1.08419	0.007	0.169	1.31648e-19
EIF4A1	non-TF	2.41477e-43	-1.08564	0.152	0.721	1.35029e-38		TRUE
NAPA	non-TF	2.75481e-20	-1.08616	0.165	0.5	1.54044e-15
LRRC58	non-TF	3.77998e-70	-1.08645	0.046	0.603	2.11369e-65
EIF3F	non-TF	7.3275e-23	-1.08813	0.408	0.809	4.09739e-18
CDK16	non-TF	3.07484e-46	-1.08837	0.06	0.493	1.71939e-41		TRUE
SEC16A	non-TF	1.26023e-56	-1.0888	0.028	0.449	7.04695e-52
GAA	non-TF	1.06444e-36	-1.08881	0.056	0.419	5.95212e-32		TRUE
TXNDC15	non-TF	9.76601e-28	-1.09025	0.141	0.537	5.46095e-23
GALK1	non-TF	5.84725e-44	-1.09221	0.05	0.441	3.26967e-39		TRUE
ILF3	non-TF	2.08694e-29	-1.09229	0.205	0.684	1.16698e-24		TRUE
SNX22	non-TF	3.14757e-148	-1.09239	0.038	0.971	1.76006e-143
RAB18	non-TF	2.42754e-22	-1.09341	0.117	0.449	1.35743e-17
MBNL2	non-TF	3.51554e-58	-1.09444	0.053	0.551	1.96582e-53
RAB11A	non-TF	5.90331e-30	-1.09574	0.193	0.64	3.30101e-25
PDIA3	non-TF	1.95076e-23	-1.09592	0.691	0.956	1.09082e-18
SERINC2	non-TF	5.071e-48	-1.09688	0.044	0.456	2.8356e-43
EIF4G2	non-TF	1.65516e-37	-1.09756	0.231	0.801	9.25533e-33
HMGCR	non-TF	7.70764e-81	-1.09953	0.026	0.566	4.30996e-76		TRUE
FOS	TF	4.32498e-20	-1.10195	0.677	0.956	2.41844e-15		TRUE
TET2	TF	1.45875e-85	-1.10349	0.023	0.581	8.15706e-81		TRUE
ZHX1	TF	4.44989e-32	-1.10364	0.066	0.412	2.48829e-27
ZHX3	TF	1.40458e-45	-1.10372	0.051	0.471	7.85414e-41
ROBO1	non-TF	1.1591e-61	-1.10374	0.055	0.581	6.48147e-57
PPIL2	non-TF	7.40509e-48	-1.10607	0.033	0.412	4.14078e-43
PRKAR1A	non-TF	2.7322e-30	-1.10667	0.265	0.779	1.52779e-25
NUCB1	non-TF	1.66949e-24	-1.1068	0.197	0.596	9.33548e-20		TRUE
EPHA7	non-TF	1.15965e-52	-1.10706	0.033	0.441	6.48452e-48		TRUE
ACLY	non-TF	7.23303e-34	-1.10749	0.081	0.471	4.04456e-29		TRUE
MAML2	non-TF	1.54128e-36	-1.10853	0.128	0.596	8.61854e-32
REV3L	non-TF	3.15613e-41	-1.10856	0.037	0.39	1.76485e-36		TRUE
PLXNB2	non-TF	3.70743e-51	-1.10897	0.017	0.368	2.07312e-46
CD164	non-TF	4.43736e-22	-1.10906	0.275	0.713	2.48128e-17
SLC39A7	non-TF	7.75541e-24	-1.11125	0.158	0.522	4.33667e-19
DDHD2	non-TF	2.33867e-40	-1.11151	0.029	0.353	1.30774e-35
SAE1	non-TF	1.1395e-43	-1.11319	0.044	0.426	6.37185e-39		TRUE
GAS1	non-TF	3.90496e-37	-1.11326	0.3	0.919	2.18357e-32	TRUE
MTCH2	non-TF	3.30471e-24	-1.11354	0.141	0.5	1.84793e-19
SLC25A36	non-TF	1.064e-38	-1.11355	0.172	0.706	5.94966e-34
MTFR1L	non-TF	9.17187e-35	-1.11939	0.066	0.426	5.12872e-30
TRNT1	non-TF	1.47586e-41	-1.12139	0.053	0.441	8.2527e-37
CYB5B	non-TF	1.00115e-38	-1.12428	0.048	0.404	5.59824e-34
PER1	non-TF	3.844e-53	-1.12533	0.056	0.529	2.14949e-48		TRUE
WDFY1	non-TF	2.71953e-42	-1.12729	0.056	0.456	1.52071e-37
ATF7	TF	2.22905e-37	-1.12816	0.106	0.551	1.24644e-32
DUSP5	non-TF	3.75997e-70	-1.12879	0.004	0.39	2.1025e-65
KDM6B	non-TF	2.8633e-140	-1.13244	0.048	0.963	1.6011e-135		TRUE
ZFAND5	non-TF	3.76176e-29	-1.13292	0.153	0.581	2.1035e-24
SMU1	non-TF	1.04901e-24	-1.13399	0.095	0.419	5.86586e-20
FZD3	non-TF	1.63341e-52	-1.13511	0.076	0.588	9.13373e-48
PAICS	non-TF	1.00422e-19	-1.13789	0.13	0.434	5.6154e-15
DNAJB11	non-TF	3.78638e-32	-1.13889	0.133	0.566	2.11727e-27
CPQ	non-TF	4.26193e-17	-1.14112	0.249	0.574	2.38318e-12
ST6GALNAC2	non-TF	1.39618e-47	-1.14166	0.024	0.375	7.80714e-43
PAIP1	non-TF	9.09604e-63	-1.14256	0.166	0.89	5.08632e-58
UBALD1	non-TF	4.02096e-70	-1.14501	0.032	0.537	2.24844e-65
NEBL	non-TF	5.50258e-25	-1.14756	0.366	0.853	3.07693e-20
KIAA1191	non-TF	4.49217e-40	-1.14795	0.086	0.529	2.51193e-35
DAG1	non-TF	1.0894e-36	-1.1494	0.148	0.64	6.09172e-32
KDM5B	non-TF	2.39828e-53	-1.15128	0.092	0.632	1.34107e-48		TRUE
MAU2	non-TF	1.252e-61	-1.15183	0.035	0.507	7.00096e-57
JMJD1C	non-TF	2.89601e-35	-1.15294	0.136	0.61	1.61939e-30
DNMT3A	non-TF	4.01643e-64	-1.15347	0.059	0.603	2.2459e-59		TRUE
DDX39B	non-TF	1.29402e-81	-1.15421	0.011	0.493	7.23593e-77
PLIN3	non-TF	3.42557e-70	-1.15601	0.056	0.632	1.91551e-65		TRUE
INAFM2	non-TF	4.3148e-86	-1.15816	0.012	0.522	2.41275e-81
FGF10	non-TF	9.22944e-53	-1.15912	0.048	0.493	5.16092e-48
SHISA4	non-TF	8.41514e-70	-1.1602	0.064	0.647	4.70558e-65
EXT2	non-TF	1.20967e-52	-1.16135	0.027	0.419	6.76423e-48
ITPK1	non-TF	2.74852e-50	-1.16145	0.016	0.353	1.53691e-45
ABCA13	non-TF	3.87616e-29	-1.16203	0.034	0.301	2.16747e-24
KRT8	non-TF	8.14754e-18	-1.16259	0.441	0.831	4.55594e-13	TRUE
CDC42	non-TF	1.02531e-26	-1.16426	0.265	0.713	5.73334e-22		TRUE
ATF7IP	non-TF	4.06784e-53	-1.16444	0.079	0.603	2.27465e-48
APP	non-TF	1.87206e-34	-1.16485	0.209	0.728	1.04682e-29		TRUE
PSMA6	non-TF	1.79046e-47	-1.16492	0.038	0.426	1.00119e-42		TRUE
NEK1	non-TF	5.51085e-42	-1.16642	0.053	0.449	3.08156e-37		TRUE
ENPP5	non-TF	3.90762e-21	-1.16877	0.155	0.493	2.18506e-16
MAP3K1	non-TF	4.18779e-114	-1.16946	0.054	0.86	2.34173e-109		TRUE
EPB41L5	non-TF	9.59181e-71	-1.17053	0.038	0.566	5.36355e-66
MAP4	non-TF	2.38037e-24	-1.17118	0.218	0.632	1.33106e-19
MMP14	non-TF	3.13463e-78	-1.17166	0.026	0.551	1.75282e-73		TRUE
FAR1	non-TF	9.87854e-47	-1.17237	0.049	0.463	5.52388e-42
SBNO2	non-TF	2.90707e-81	-1.1746	0.011	0.493	1.62557e-76
SPOP	non-TF	1.09946e-38	-1.1755	0.089	0.522	6.14797e-34
RDH13	non-TF	3.16583e-60	-1.1765	0.004	0.338	1.77027e-55
LUC7L	non-TF	3.06952e-41	-1.17663	0.13	0.647	1.71641e-36
ITFG1	non-TF	1.09249e-46	-1.17738	0.093	0.596	6.10899e-42
BRWD1	non-TF	1.07909e-54	-1.1796	0.038	0.471	6.03406e-50
KIF21A	non-TF	4.21789e-38	-1.18044	0.164	0.684	2.35856e-33
FRAS1	non-TF	2.06314e-75	-1.18343	0.009	0.449	1.15367e-70
ARF4	non-TF	3.62299e-40	-1.18343	0.163	0.691	2.0259e-35
SNRPB	non-TF	2.73866e-40	-1.18884	0.142	0.64	1.53141e-35
TPM4	non-TF	1.49257e-43	-1.19004	0.064	0.485	8.34617e-39
DCAF7	non-TF	3.38455e-37	-1.1908	0.092	0.515	1.89257e-32
PIGT	non-TF	1.31199e-36	-1.19441	0.144	0.625	7.33637e-32
INSIG1	non-TF	6.71725e-58	-1.19551	0.016	0.397	3.75615e-53
ABCC5	non-TF	6.37426e-95	-1.19647	0.015	0.581	3.56436e-90		TRUE
CAVIN1	non-TF	6.42243e-38	-1.19809	0.163	0.669	3.59129e-33
PIGQ	non-TF	1.24037e-39	-1.19872	0.05	0.419	6.93591e-35
KIAA1024L	non-TF	8.49379e-62	-1.20499	0.004	0.346	4.74956e-57
EIF3C	non-TF	9.91325e-78	-1.2059	0.012	0.478	5.54329e-73
TPD52	non-TF	3.41639e-48	-1.2098	0.109	0.64	1.91038e-43
MGRN1	non-TF	2.17954e-38	-1.2118	0.054	0.426	1.21876e-33
LAPTM4B	non-TF	7.43132e-39	-1.21577	0.048	0.404	4.15545e-34
ISLR	non-TF	3.40855e-30	-1.21578	0.026	0.279	1.90599e-25
PLD3	non-TF	5.12467e-30	-1.21588	0.149	0.566	2.86561e-25
TMEM263	non-TF	3.54411e-44	-1.21613	0.056	0.471	1.9818e-39
TXNDC16	non-TF	4.52477e-32	-1.21958	0.089	0.463	2.53016e-27
AP2M1	non-TF	8.83064e-29	-1.22026	0.28	0.75	4.93792e-24
DDB1	non-TF	1.42457e-37	-1.22232	0.083	0.493	7.96589e-33		TRUE
TRIM35	non-TF	3.86678e-57	-1.22579	0.005	0.331	2.16223e-52
TP53INP2	non-TF	1.9326e-70	-1.22711	0.023	0.493	1.08067e-65
RIMKLB	non-TF	2.12887e-70	-1.22762	0.035	0.551	1.19042e-65
KIAA1549L	non-TF	3.20981e-60	-1.2299	0.04	0.515	1.79486e-55
DNAJA1	non-TF	4.33404e-22	-1.23012	0.466	0.853	2.42351e-17
LRRC8A	non-TF	1.90072e-83	-1.23041	0.071	0.757	1.06284e-78
SDF4	non-TF	1.63979e-28	-1.23325	0.165	0.581	9.16939e-24		TRUE
COL11A1	non-TF	1.93004e-67	-1.23389	0.078	0.691	1.07924e-62		TRUE
ELMO1	non-TF	1.67291e-37	-1.23434	0.061	0.434	9.35456e-33
RCN3	non-TF	6.28877e-46	-1.2356	0.009	0.294	3.51655e-41
LENG8	non-TF	3.72969e-59	-1.2359	0.087	0.662	2.08557e-54
DTNA	non-TF	8.40029e-64	-1.23602	0.031	0.493	4.69727e-59
CLK4	non-TF	1.81539e-46	-1.23693	0.026	0.375	1.01513e-41		TRUE
ZNF207	TF	5.67269e-65	-1.23822	0.114	0.787	3.17205e-60
SEC13	non-TF	7.77021e-40	-1.23927	0.064	0.456	4.34494e-35
RNF4	non-TF	5.71562e-61	-1.23984	0.042	0.522	3.19606e-56
FAM120A	non-TF	3.65801e-46	-1.24059	0.105	0.618	2.04549e-41
SMPDL3A	non-TF	2.65712e-53	-1.24644	0.002	0.294	1.48581e-48
EYA1	non-TF	6.39698e-64	-1.24759	0.145	0.846	3.57706e-59
PHACTR2	non-TF	7.61771e-51	-1.24794	0.038	0.449	4.25967e-46
PGPEP1	non-TF	3.68428e-93	-1.24884	0.04	0.691	2.06018e-88
C1orf43	non-TF	1.9832e-33	-1.24905	0.154	0.61	1.10896e-28
PYGB	non-TF	2.81732e-60	-1.25233	0.02	0.426	1.57539e-55		TRUE
SBSPON	non-TF	3.09582e-36	-1.25321	0.004	0.213	1.73112e-31
OTUB1	non-TF	9.9841e-53	-1.25347	0.126	0.691	5.58291e-48
ZSCAN26	TF	1.44517e-75	-1.2562	0.046	0.618	8.08113e-71
NACC2	non-TF	1.54063e-61	-1.262	0.048	0.544	8.61488e-57
GPC4	non-TF	5.00971e-75	-1.26221	0.001	0.397	2.80133e-70
TRPM3	non-TF	9.6578e-38	-1.26355	0.224	0.794	5.40045e-33		TRUE
CLASP1	non-TF	1.19607e-71	-1.26497	0.042	0.581	6.68816e-67
PLOD2	non-TF	1.47701e-57	-1.2684	0.053	0.544	8.25914e-53
OAZ2	non-TF	6.2214e-36	-1.27145	0.18	0.669	3.47889e-31
TBC1D10A	non-TF	3.6452e-69	-1.27197	0.011	0.426	2.03832e-64
NSD1	non-TF	6.65647e-53	-1.27428	0.109	0.669	3.72216e-48
XPNPEP1	non-TF	3.15831e-48	-1.27464	0.022	0.368	1.76606e-43		TRUE
CDK4	non-TF	4.24044e-52	-1.27486	0.103	0.647	2.37117e-47		TRUE
DOCK9	non-TF	2.83155e-53	-1.27813	0.024	0.412	1.58335e-48
PROM2	non-TF	1.11305e-61	-1.2782	0.002	0.338	6.22393e-57
CNN3	non-TF	8.72245e-29	-1.28103	0.556	0.941	4.87742e-24	TRUE
CASK	non-TF	5.44078e-46	-1.28627	0.035	0.412	3.04238e-41
PPIB	non-TF	5.6443e-31	-1.28856	0.532	0.985	3.15618e-26	TRUE	TRUE
OGDH	non-TF	1.30092e-58	-1.29253	0.043	0.507	7.27449e-54		TRUE
LPCAT2	non-TF	1.13434e-70	-1.29358	0.032	0.537	6.34301e-66
COPG1	non-TF	7.12552e-47	-1.29453	0.044	0.441	3.98445e-42
TMEM170A	non-TF	6.67252e-54	-1.3007	0.104	0.662	3.73114e-49
PDGFRL	non-TF	1.20722e-46	-1.30411	0.039	0.426	6.75053e-42
SPECC1L	non-TF	9.87569e-46	-1.30458	0.039	0.419	5.52229e-41		TRUE
SLC26A4	non-TF	9.90283e-38	-1.306	0.002	0.213	5.53747e-33
ANXA6	non-TF	3.18643e-30	-1.30753	0.227	0.691	1.78179e-25
STT3A	non-TF	2.71727e-79	-1.30884	0.071	0.735	1.51944e-74
ME1	non-TF	7.17496e-76	-1.312	0.023	0.522	4.01209e-71
SULF1	non-TF	5.8476e-54	-1.31288	0.056	0.537	3.26986e-49
DAZAP2	non-TF	7.2541e-38	-1.31422	0.235	0.772	4.05635e-33
CCT7	non-TF	1.86909e-20	-1.31449	0.257	0.603	1.04516e-15
TIMP3	non-TF	3.75687e-54	-1.31652	0.06	0.544	2.10077e-49
LAMA5	non-TF	1.36748e-75	-1.32205	0.01	0.456	7.64666e-71		TRUE
PLS1	non-TF	2.8687e-33	-1.32351	0.263	0.779	1.60412e-28
NAXD	non-TF	6.32826e-55	-1.32377	0.031	0.441	3.53864e-50
OAT	non-TF	9.96413e-32	-1.32884	0.09	0.463	5.57174e-27		TRUE
GPR37	non-TF	8.87265e-36	-1.32904	0.147	0.61	4.96141e-31		TRUE
GPS1	non-TF	1.82654e-46	-1.33094	0.068	0.507	1.02136e-41
TUBA1A	non-TF	2.98765e-18	-1.33214	0.746	0.963	1.67063e-13		TRUE
HNRNPK	non-TF	1.98777e-27	-1.33293	0.506	0.919	1.11152e-22
CDC23	non-TF	3.0411e-36	-1.3353	0.083	0.485	1.70052e-31
IVNS1ABP	non-TF	3.58117e-51	-1.34251	0.061	0.529	2.00252e-46
SLC5A3	non-TF	2.04075e-30	-1.34517	0.06	0.39	1.14114e-25		TRUE
CLK1	non-TF	2.48683e-77	-1.34651	0.051	0.647	1.39058e-72		TRUE
WLS	non-TF	2.48479e-28	-1.34797	0.136	0.537	1.38945e-23
H1F0	non-TF	9.47861e-39	-1.35251	0.156	0.654	5.30025e-34
SLC27A1	non-TF	2.58322e-74	-1.35305	0.026	0.529	1.44448e-69		TRUE
GPI	non-TF	1.89511e-48	-1.35405	0.098	0.596	1.05971e-43		TRUE
ING4	non-TF	2.45287e-48	-1.35437	0.055	0.485	1.3716e-43
AAMP	non-TF	2.28869e-51	-1.35868	0.119	0.669	1.27979e-46
RRP1	non-TF	4.53636e-71	-1.36262	0.027	0.515	2.53664e-66
MPZL1	non-TF	5.36765e-30	-1.36417	0.235	0.691	3.00148e-25
SLC6A14	non-TF	1.68084e-30	-1.37246	0.071	0.412	9.39895e-26		TRUE
GPX2	non-TF	6.20266e-22	-1.37371	0.05	0.294	3.4684e-17
MAPRE1	non-TF	1.98496e-44	-1.37623	0.125	0.632	1.10995e-39
NADK	non-TF	4.68119e-58	-1.37667	0.023	0.426	2.61763e-53
KIF19	non-TF	6.02713e-59	-1.38186	0.143	0.779	3.37025e-54
CCT5	non-TF	4.37752e-37	-1.38247	0.143	0.61	2.44782e-32
EDNRB	non-TF	3.12861e-34	-1.38578	0.147	0.596	1.74946e-29		TRUE
CLDN7	non-TF	1.83788e-21	-1.38936	0.337	0.75	1.0277e-16
C19orf48	non-TF	8.86401e-81	-1.39075	0.012	0.493	4.95658e-76
OAZ1	non-TF	2.06762e-40	-1.39079	0.567	0.971	1.15617e-35
KHDC4	non-TF	3.49956e-109	-1.39239	0.012	0.632	1.95688e-104
SDHA	non-TF	7.15592e-40	-1.39471	0.104	0.559	4.00144e-35
SS18	non-TF	3.24159e-51	-1.39481	0.04	0.456	1.81263e-46
TRPM7	non-TF	8.70904e-64	-1.39536	0.035	0.515	4.86992e-59		TRUE
TBCK	non-TF	1.5282e-68	-1.39548	0.016	0.449	8.54541e-64
CD82	non-TF	1.38662e-65	-1.40135	0.033	0.507	7.75373e-61		TRUE
TWSG1	non-TF	9.98679e-93	-1.40223	0.02	0.596	5.58441e-88
MORF4L2	non-TF	1.54389e-57	-1.4029	0.122	0.743	8.6331e-53
CCNL2	non-TF	7.89991e-63	-1.40995	0.054	0.574	4.41747e-58
ST8SIA2	non-TF	5.58326e-27	-1.41074	0.21	0.632	3.12205e-22
USP9X	non-TF	6.04722e-96	-1.41476	0.055	0.765	3.38149e-91
JAG1	non-TF	1.78948e-56	-1.41744	0.097	0.669	1.00064e-51		TRUE
BUB3	non-TF	1.34799e-29	-1.41945	0.24	0.684	7.53772e-25
MELTF	non-TF	5.98885e-62	-1.42459	0.034	0.493	3.34884e-57
UCP2	non-TF	3.93093e-83	-1.42497	0.017	0.529	2.1981e-78		TRUE
KIAA0100	non-TF	8.96371e-55	-1.42501	0.033	0.449	5.01233e-50
NFKBIZ	non-TF	3.98003e-107	-1.42633	0.015	0.64	2.22556e-102
JPT1	non-TF	3.09295e-43	-1.42717	0.103	0.574	1.72951e-38
RFK	non-TF	1.90575e-38	-1.42796	0.199	0.713	1.06566e-33		TRUE
PIGS	non-TF	4.5498e-64	-1.43466	0.059	0.588	2.54416e-59
SGTA	non-TF	2.17434e-50	-1.43999	0.043	0.456	1.21585e-45
SCRN1	non-TF	6.93599e-24	-1.44052	0.256	0.662	3.87846e-19
PLCD4	non-TF	2.35852e-57	-1.44144	0.017	0.397	1.31884e-52
CRIP2	non-TF	1.92194e-31	-1.44684	0.231	0.684	1.07471e-26
CGN	non-TF	4.60332e-72	-1.45058	0.049	0.603	2.57409e-67
ATXN1	non-TF	1.20728e-71	-1.4548	0.086	0.728	6.75089e-67
GUF1	non-TF	1.23757e-59	-1.4563	0.016	0.404	6.92026e-55
TMEM170B	non-TF	1.62898e-61	-1.4577	0.004	0.346	9.10892e-57
TM9SF2	non-TF	6.96933e-38	-1.46394	0.164	0.654	3.89711e-33
TMEM30A	non-TF	1.37794e-57	-1.46493	0.061	0.559	7.70514e-53
MFAP2	non-TF	1.91148e-84	-1.4703	0.034	0.618	1.06886e-79
NSMF	non-TF	6.86013e-73	-1.47307	0.029	0.529	3.83605e-68
NXF1	non-TF	7.33931e-123	-1.47703	0.034	0.816	4.104e-118
UBC	non-TF	4.0442e-23	-1.47789	0.543	0.89	2.26143e-18		TRUE
CCND3	non-TF	1.26391e-62	-1.48115	0.023	0.449	7.06753e-58		TRUE
DDI2	non-TF	1.19545e-125	-1.48578	0.028	0.801	6.6847e-121
SIRT2	non-TF	1.29688e-46	-1.48899	0.104	0.603	7.25189e-42		TRUE
SLITRK6	non-TF	7.44244e-22	-1.48925	0.292	0.662	4.16166e-17	TRUE	TRUE
JUNB	TF	1.0103e-26	-1.49158	0.553	0.949	5.64942e-22	TRUE	TRUE
SNX1	non-TF	2.36052e-48	-1.49376	0.112	0.632	1.31995e-43
PSMA3	non-TF	4.50459e-42	-1.49831	0.247	0.816	2.51888e-37		TRUE
RGCC	non-TF	2.07684e-47	-1.49853	0.066	0.515	1.16133e-42
CYB5R3	non-TF	6.82236e-36	-1.49964	0.298	0.801	3.81493e-31		TRUE
USP37	non-TF	5.5803e-70	-1.50817	0.017	0.463	3.12039e-65
NUDT3	non-TF	6.83053e-66	-1.51033	0.132	0.801	3.8195e-61
SOX9	TF	5.15742e-41	-1.51378	0.303	0.897	2.88393e-36	TRUE
ADAM10	non-TF	1.78375e-69	-1.51897	0.105	0.765	9.97435e-65		TRUE
FSCN1	non-TF	5.27266e-85	-1.51998	0.072	0.757	2.94837e-80		TRUE
RIDA	non-TF	3.65701e-72	-1.52099	0.042	0.581	2.04493e-67
DDAH1	non-TF	6.72633e-89	-1.52108	0.021	0.581	3.76123e-84		TRUE
KDELR2	non-TF	3.46777e-77	-1.52116	0.144	0.897	1.93911e-72
PPP2R1A	non-TF	2.88957e-42	-1.5225	0.149	0.654	1.61579e-37
PLOD1	non-TF	4.09282e-50	-1.52253	0.094	0.603	2.28862e-45		TRUE
CDO1	non-TF	2.03059e-110	-1.52446	0.002	0.581	1.13546e-105
EPCAM	non-TF	2.88587e-36	-1.53633	0.672	0.971	1.61372e-31		TRUE
MANBA	non-TF	4.1816e-53	-1.53652	0.022	0.397	2.33827e-48
RAB31	non-TF	1.09682e-37	-1.53843	0.068	0.449	6.13321e-33
FUCA1	non-TF	4.40324e-51	-1.54123	0.077	0.559	2.4622e-46
MAL2	non-TF	3.00925e-37	-1.54491	0.075	0.463	1.68271e-32
UBE2D3	non-TF	2.69353e-44	-1.55065	0.182	0.735	1.50617e-39
RCAN1	non-TF	1.19314e-40	-1.5516	0.033	0.368	6.67178e-36
HNRNPF	non-TF	3.71229e-38	-1.55161	0.142	0.603	2.07584e-33
GADD45G	non-TF	6.58938e-23	-1.55182	0.125	0.463	3.68465e-18		TRUE
SCCPDH	non-TF	3.55278e-35	-1.55696	0.123	0.551	1.98664e-30
STX7	non-TF	6.81852e-51	-1.55764	0.035	0.434	3.81278e-46
ANKRD6	non-TF	1.1435e-54	-1.56316	0.09	0.618	6.39421e-50
IGFBP4	non-TF	9.82577e-43	-1.56901	0.018	0.324	5.49437e-38		TRUE
NAV2	non-TF	4.02891e-84	-1.57192	0.053	0.691	2.25288e-79
LDHA	non-TF	5.92062e-32	-1.57376	0.291	0.779	3.31069e-27		TRUE
ADO	non-TF	3.60999e-53	-1.57457	0.026	0.412	2.01863e-48		TRUE
GABARAP	non-TF	5.16148e-94	-1.57751	0.084	0.831	2.88619e-89
FKBP10	non-TF	5.80451e-47	-1.57762	0.075	0.522	3.24576e-42
RLIM	non-TF	1.70932e-62	-1.58275	0.042	0.522	9.55816e-58
NORAD	non-TF	1.23366e-52	-1.58435	0.164	0.772	6.89839e-48
DCTN4	non-TF	7.72383e-92	-1.588	0.086	0.824	4.31901e-87
SLC1A3	non-TF	8.66256e-29	-1.58989	0.41	0.868	4.84393e-24	TRUE	TRUE
EGR1	TF	5.03615e-44	-1.59066	0.452	0.978	2.81612e-39		TRUE
IGSF3	non-TF	8.32025e-92	-1.59196	0.021	0.588	4.65252e-87
COPZ1	non-TF	2.80389e-46	-1.60498	0.158	0.691	1.56788e-41
SEC24C	non-TF	5.9772e-98	-1.61051	0.016	0.596	3.34233e-93
GOLT1B	non-TF	2.48387e-70	-1.61162	0.027	0.507	1.38893e-65
TRIB1	non-TF	4.77444e-81	-1.62482	0.056	0.684	2.66977e-76
CNBP	TF	1.27633e-39	-1.62702	0.433	0.875	7.137e-35
HDAC3	non-TF	1.19424e-51	-1.62946	0.114	0.654	6.67797e-47		TRUE
CFAP20	non-TF	6.53047e-58	-1.63689	0.077	0.603	3.65171e-53
PPP1R2	non-TF	1.48428e-46	-1.64553	0.136	0.669	8.29978e-42
OTOG	non-TF	4.05691e-20	-1.66043	0.894	0.971	2.26854e-15	TRUE
KIT	non-TF	5.90965e-75	-1.66761	0.002	0.404	3.30456e-70		TRUE
EEF2	non-TF	1.06688e-34	-1.66952	0.449	0.868	5.96576e-30		TRUE
F11R	non-TF	1.25605e-78	-1.67	0.049	0.632	7.02357e-74
CBX3	non-TF	9.85566e-44	-1.6707	0.403	0.971	5.51109e-39
TGFB2	non-TF	5.10559e-79	-1.67201	0.071	0.706	2.85495e-74		TRUE
LIFR	non-TF	1.70653e-83	-1.67815	0.012	0.507	9.54255e-79		TRUE
UBAP2L	non-TF	1.30469e-96	-1.6853	0.042	0.713	7.29555e-92
RPN1	non-TF	1.6937e-88	-1.68785	0.093	0.838	9.47084e-84
GDI2	non-TF	4.50469e-66	-1.69711	0.081	0.669	2.51893e-61
TOX	TF	5.79717e-114	-1.70146	0.04	0.794	3.24166e-109
FBXO32	non-TF	2.686e-49	-1.70357	0.182	0.772	1.50196e-44
FAT1	non-TF	1.79817e-68	-1.70612	0.073	0.662	1.0055e-63
ARHGAP44	non-TF	1.10579e-81	-1.71328	0.026	0.566	6.18338e-77
ADIPOR1	non-TF	1.06394e-73	-1.71335	0.042	0.581	5.94936e-69
PRSS35	non-TF	1.92159e-86	-1.71366	0.004	0.471	1.07451e-81
SOAT1	non-TF	3.61615e-97	-1.71778	0.029	0.662	2.02208e-92		TRUE
GJB2	non-TF	1.0726e-66	-1.72356	0.112	0.75	5.99777e-62		TRUE
LMNA	non-TF	9.22086e-64	-1.72462	0.098	0.699	5.15612e-59		TRUE
EIF5A	non-TF	1.71299e-65	-1.72557	0.143	0.794	9.57867e-61		TRUE
TMEM250	non-TF	1.49146e-124	-1.72587	0.017	0.728	8.33994e-120
ITGBL1	non-TF	4.3369e-39	-1.73122	0.004	0.228	2.42511e-34
PSAT1	non-TF	4.41868e-43	-1.73802	0.144	0.647	2.47084e-38
GORASP2	non-TF	4.43659e-62	-1.73885	0.099	0.691	2.48085e-57
CTSA	non-TF	1.00262e-59	-1.74429	0.07	0.581	5.60647e-55		TRUE
NMT2	non-TF	1.47035e-38	-1.74802	0.148	0.61	8.22193e-34
TIPARP	non-TF	3.04337e-46	-1.74919	0.059	0.485	1.70179e-41
NCSTN	non-TF	1.5633e-60	-1.75132	0.044	0.515	8.74167e-56		TRUE
HSPA8	non-TF	5.82524e-49	-1.75168	0.446	0.963	3.25736e-44		TRUE
NRAS	non-TF	1.46472e-95	-1.75813	0.024	0.625	8.19042e-91		TRUE
EGR2	TF	7.32415e-93	-1.76856	0.002	0.493	4.09552e-88		TRUE
HIF1A	TF	9.34447e-51	-1.77706	0.22	0.838	5.22524e-46		TRUE
ATP5F1B	non-TF	7.42563e-42	-1.79355	0.244	0.75	4.15227e-37
SLC39A1	non-TF	5.8255e-141	-1.79698	0.05	0.949	3.2575e-136
MAP2K1	non-TF	6.21794e-77	-1.80047	0.065	0.676	3.47695e-72		TRUE
CDKN1A	non-TF	2.97424e-87	-1.80535	0.009	0.5	1.66313e-82		TRUE
EFNA5	non-TF	3.83763e-96	-1.82374	0.015	0.581	2.14593e-91
CD81	non-TF	7.33127e-43	-1.82678	0.586	0.912	4.0995e-38
FAM69A	non-TF	2.60131e-59	-1.83338	0.011	0.375	1.4546e-54
SURF4	non-TF	1.38495e-60	-1.84055	0.084	0.625	7.74435e-56
ALDH1A3	non-TF	4.96579e-75	-1.8427	0.015	0.478	2.77677e-70
DKK3	non-TF	4.55757e-35	-1.84524	0.267	0.735	2.5485e-30		TRUE
TUBB2A	non-TF	2.87772e-32	-1.84611	0.22	0.654	1.60917e-27		TRUE
PPIA	non-TF	3.31096e-56	-1.86176	0.456	0.993	1.85142e-51		TRUE
TPM3	non-TF	4.28459e-56	-1.86572	0.238	0.868	2.39586e-51		TRUE
EIF4A2	non-TF	1.20415e-55	-1.86836	0.213	0.831	6.73339e-51
ATP2B1	non-TF	2.14917e-65	-1.87114	0.159	0.831	1.20177e-60		TRUE
TUBA1C	non-TF	4.87055e-168	-1.88541	0.026	0.963	2.72351e-163		TRUE
PLAT	non-TF	4.21845e-58	-1.89382	0.086	0.618	2.35887e-53		TRUE
ARC	non-TF	9.82706e-62	-1.89673	0.005	0.353	5.4951e-57
FAM234A	non-TF	9.12167e-89	-1.91058	0.034	0.64	5.10065e-84
VCP	non-TF	1.34497e-63	-1.91622	0.116	0.721	7.52079e-59		TRUE
ABHD4	non-TF	1.7382e-102	-1.92942	0.012	0.596	9.71964e-98
COL9A2	non-TF	9.06684e-50	-1.93075	0.284	0.86	5.07e-45
P2RX2	non-TF	9.78874e-113	-1.93403	0	0.574	5.47367e-108		TRUE
APOD	non-TF	4.15221e-109	-1.9347	0.004	0.581	2.32183e-104		TRUE
NOTCH1	non-TF	5.89834e-65	-1.96023	0.149	0.801	3.29823e-60		TRUE
SPRY2	non-TF	5.26582e-154	-1.96277	0.026	0.904	2.94454e-149
RSRP1	non-TF	4.79082e-75	-1.96663	0.095	0.743	2.67893e-70
EFNA1	non-TF	1.73968e-76	-1.97653	0.024	0.529	9.72796e-72
C5orf15	non-TF	4.70559e-71	-1.97889	0.068	0.647	2.63127e-66
ACTG1	non-TF	3.88924e-58	-1.98166	0.824	0.993	2.17478e-53	TRUE	TRUE
LAMP1	non-TF	2.36907e-63	-1.98463	0.193	0.846	1.32474e-58		TRUE
TMED2	non-TF	3.77749e-55	-1.98634	0.271	0.86	2.1123e-50
CPXM2	non-TF	1.06001e-51	-1.98816	0.254	0.846	5.92737e-47
PTP4A1	non-TF	1.14586e-73	-1.99422	0.088	0.728	6.4074e-69		TRUE
DDOST	non-TF	4.18131e-66	-1.99757	0.216	0.912	2.33811e-61
FASN	non-TF	7.01569e-92	-2.03148	0.04	0.669	3.92303e-87		TRUE
TWF1	non-TF	2.42565e-40	-2.04821	0.658	0.963	1.35638e-35	TRUE
MYBPC1	non-TF	4.48443e-88	-2.05674	0.007	0.5	2.5076e-83
LAMP2	non-TF	1.08516e-65	-2.07148	0.177	0.846	6.06802e-61
CTSB	non-TF	7.48339e-57	-2.0906	0.249	0.86	4.18456e-52		TRUE
CTSD	non-TF	2.37326e-53	-2.09666	0.215	0.794	1.32708e-48		TRUE
BSG	non-TF	1.10531e-51	-2.10328	0.373	0.919	6.18065e-47		TRUE
PPP1R15A	non-TF	1.01345e-52	-2.1121	0.07	0.537	5.66699e-48
SAT1	non-TF	5.0905e-34	-2.12919	0.521	0.904	2.84651e-29	TRUE
TENM4	non-TF	2.18096e-121	-2.13842	0.048	0.846	1.21955e-116
FKBP4	non-TF	5.57665e-82	-2.14037	0.116	0.816	3.11835e-77		TRUE
IGFBP5	non-TF	1.67647e-71	-2.14669	0.224	0.949	9.37446e-67		TRUE
P4HB	non-TF	3.11472e-62	-2.15512	0.214	0.86	1.74169e-57		TRUE
KLF13	TF	4.51215e-127	-2.15583	0.033	0.816	2.52311e-122
ATF3	TF	2.65696e-66	-2.16132	0.011	0.412	1.48572e-61		TRUE
LGR4	non-TF	7.7751e-105	-2.16281	0.072	0.846	4.34768e-100		TRUE
NREP	non-TF	7.72059e-68	-2.1762	0.051	0.588	4.3172e-63
FNDC7	non-TF	8.9182e-70	-2.18062	0.011	0.426	4.98688e-65
PDIA4	non-TF	4.91903e-46	-2.18454	0.346	0.853	2.75063e-41	TRUE
PLEKHB1	non-TF	1.51333e-58	-2.19076	0.435	0.978	8.46227e-54
SEC61A1	non-TF	5.86906e-69	-2.20426	0.153	0.809	3.28186e-64
RLBP1	non-TF	4.17791e-81	-2.20754	0.043	0.61	2.3362e-76
THBS1	non-TF	3.49238e-48	-2.20973	0.092	0.574	1.95287e-43		TRUE
USP22	non-TF	4.3612e-82	-2.22048	0.115	0.816	2.4387e-77
CALML4	non-TF	7.3107e-124	-2.22981	0.026	0.757	4.088e-119
CNTN1	non-TF	2.35382e-87	-2.23301	0.087	0.787	1.31621e-82
SPARC	non-TF	8.48574e-60	-2.2377	0.549	0.993	4.74506e-55	TRUE	TRUE
APOE	non-TF	4.69211e-38	-2.25035	0.103	0.529	2.62374e-33		TRUE
LGMN	non-TF	2.02806e-112	-2.25174	0.048	0.787	1.13405e-107		TRUE
OTOA	non-TF	1.93236e-49	-2.25402	0.285	0.86	1.08054e-44
CARMIL1	non-TF	1.77336e-65	-2.2724	0.148	0.787	9.91627e-61
CNMD	non-TF	2.82871e-31	-2.28463	0.038	0.324	1.58176e-26
KMT2D	non-TF	1.62713e-167	-2.32499	0.013	0.904	9.09859e-163		TRUE
PITPNC1	non-TF	3.47449e-149	-2.32818	0.022	0.86	1.94286e-144
TMEM117	non-TF	1.39965e-73	-2.36141	0.079	0.684	7.82655e-69
MAGED1	non-TF	1.97237e-80	-2.3669	0.117	0.794	1.10291e-75
FKBP9	non-TF	1.33576e-78	-2.37932	0.105	0.772	7.46928e-74
ALDOC	non-TF	2.14822e-52	-2.38638	0.324	0.853	1.20124e-47
TMOD1	non-TF	2.60751e-63	-2.39091	0.493	0.971	1.45807e-58	TRUE
ANXA5	non-TF	8.76222e-60	-2.43052	0.428	0.941	4.89966e-55		TRUE
OC90	non-TF	5.87878e-50	-2.43367	0.012	0.331	3.2873e-45
EEF1G	non-TF	2.46473e-117	-2.4381	0.032	0.75	1.37823e-112
SFRP1	non-TF	5.37039e-159	-2.50623	0.007	0.831	3.00302e-154
NISCH	non-TF	4.866e-124	-2.53103	0.071	0.919	2.72097e-119
SOCS2	non-TF	1.26203e-143	-2.54885	0.022	0.831	7.05703e-139
DUSP1	non-TF	3.23957e-38	-2.54996	0.182	0.662	1.8115e-33		TRUE
GAS2	non-TF	8.51598e-68	-2.55927	0.301	0.934	4.76196e-63
OGT	non-TF	1.11678e-148	-2.56241	0.026	0.882	6.24484e-144
HSPA2	non-TF	6.42829e-74	-2.58244	0.103	0.735	3.59457e-69
CYR61	non-TF	7.4741e-47	-2.58761	0.143	0.654	4.17937e-42
MAT2A	non-TF	9.59733e-79	-2.59125	0.059	0.662	5.36664e-74		TRUE
ACTB	non-TF	3.67518e-73	-2.59396	0.736	1	2.05509e-68	TRUE	TRUE
CEP41	non-TF	2.33492e-92	-2.60875	0.1	0.831	1.30564e-87
PTP4A2	non-TF	1.12954e-85	-2.62945	0.247	0.978	6.31615e-81
MEST	non-TF	1.65858e-93	-2.63727	0.083	0.801	9.27443e-89
C2orf40	non-TF	4.49536e-45	-2.6754	0.218	0.779	2.51372e-40
KLF6	TF	4.18774e-78	-2.68616	0.111	0.772	2.3417e-73
FSTL1	non-TF	9.07248e-133	-2.68937	0.026	0.794	5.07315e-128
SFXN5	non-TF	6.035e-164	-2.69674	0.02	0.912	3.37465e-159
WDR1	non-TF	2.81011e-102	-2.70654	0.077	0.824	1.57136e-97
TECTA	non-TF	7.18553e-76	-2.74014	0.171	0.86	4.018e-71
ALDOA	non-TF	9.95279e-137	-2.74628	0.026	0.809	5.5654e-132
CLDN9	non-TF	2.48787e-81	-2.75668	0.213	0.934	1.39117e-76
NEDD4	non-TF	5.16491e-134	-2.7957	0.064	0.941	2.88811e-129		TRUE
RBM5	non-TF	1.0722e-130	-2.81475	0.046	0.868	5.99551e-126
GSK3B	non-TF	3.71154e-148	-2.88413	0.039	0.919	2.07542e-143		TRUE
YWHAZ	non-TF	4.66343e-84	-2.88571	0.293	0.971	2.6077e-79
PLA2G7	non-TF	1.51512e-86	-2.93404	0.065	0.713	8.47225e-82		TRUE
LTBP1	non-TF	5.59375e-116	-3.01715	0.094	0.926	3.12791e-111
KAZALD1	non-TF	3.82836e-87	-3.02801	0.139	0.846	2.14074e-82
TSPAN12	non-TF	5.2714e-158	-3.06067	0.009	0.831	2.94766e-153
SOCS3	non-TF	9.79352e-126	-3.07635	0.031	0.779	5.47634e-121		TRUE
RCN1	non-TF	1.49211e-75	-3.12585	0.225	0.912	8.34358e-71
UGDH	non-TF	2.18129e-90	-3.20725	0.094	0.779	1.21973e-85		TRUE
LARS2	non-TF	1.50617e-202	-3.28708	0.005	1	8.42222e-198
BTG2	non-TF	3.7498e-64	-3.41394	0.287	0.897	2.09681e-59
COL9A1	non-TF	2.51818e-130	-3.44885	0.064	0.897	1.40812e-125
SDC4	non-TF	6.54218e-78	-3.53954	0.443	0.993	3.65826e-73
NR4A1	TF	3.46311e-74	-3.71665	0.293	0.926	1.9365e-69		TRUE
GM2A	non-TF	2.5833e-177	-3.85457	0.016	0.941	1.44453e-172		TRUE
TECTB	non-TF	1.46272e-27	-4.94328	0.013	0.213	8.17924e-23
