# Supplementary material for: Revealing heterogeneity and damage response in the adult human utricle
Source: Research Square preprint supplement (doi:10.21203/rs.3.rs-3649756/v1), 2024-03-11
Supplement: Supplementary file 5 [file 964731daf609af2f06a51e3e.xlsx]

## Sheet: Table S2. QCstats
Table S2. Quality controls and filters for scRNA-seq samples (n=2).
The samples used for the main Figures are highlighted in green, while the rest are featured in Supplementary Figures.
Sample ID	Reads Mapped to Genome	Mean Reads per Cell	Median Genes per Cell	Median UMI Counts per Cell	Cell Count (before filtering)	Cell Count (after filtering)	MT cut-off
scUntr-1	0.83	85114	105	129	403	158	0.125
scUntr-2	0.951	31163	995	1944	1134	967	0.16
scCtrl-1	0.955	18816	898	1704	2210	2033	0.12
scCtrl-2	0.961	57290	1564	3971	786	689	0.1
scGent-1	0.939	26059	806	1634	338	283	0.08
scGent-2	0.932	40401	346	475	3217	2670	0.15

## Sheet: Table S2. Library construction
Table S2. scRNA-seq library construction and sequencing details (n=2).
The samples used for the main Figures are highlighted in green, while the rest are featured in Supplementary Figures.
Sample ID	Normalization (nM)	Diluition (nM)	Denaturation (N)	Diluition (pM)	Buffer (Illumina)	Loading concentration (pM)	Platform	Flowcell (Illumina)
scUntr-1	2	N/A	0.2 NaOH 5'	20	HT1	1.85	NextSeq 500	MidOutput v2.5
scUntr-2	10	2	0.1 NaOH 5'	20	HT1	16	HiSeq 2500	HiSeq SBS V4 PE
scCtrl-1	2	N/A	0.2 NaOH 5'	20	HT1	1.85	NextSeq 500	MidOutput v2.5
scCtrl-2	2	N/A	0.2 NaOH 5'	20	HT1	1.85	NextSeq 500	MidOutput v2.5
scGent-1	10	1.75	0.2 NaOH 8'	N/A	N/A	350	NovaSeq 6000	SP (standard workflow)
scGent-2	1.75	N/A	0.2 NaOH 8'	N/A	N/A	350	NovaSeq 6000	SP (standard workflow)
