# Supplementary material for: Revealing heterogeneity and damage response in the adult human utricle
Source: Research Square preprint supplement (doi:10.21203/rs.3.rs-3649756/v1), 2024-03-11
Supplement: Supplementary file 7 [file 9bdb8405b9541a4c5df2bc81.xlsx]

## Sheet: Table S1. Patients
Table S1. List of human utricle samples used for the experiments.
Experiment + Sample ID	Age	Sex	Side	Hearing and Balance Assessment	Treatment
Bulk RNA-sequencing
BCtrl-1	45	M	L	L HL, flat SNHL. No vestibular disorders	24h Control
BCtrl-2	56	F	R	R HL + tinnitus. R peripheral vest. Dysfunction, benign positional vertigo, cannot rule out central vestibular abnormalities	24h Control
BCtrl-3	45	M	L	L HL + tinnitus. No vestibular disorders	24h Control
BGent-1	65	F	R	R progressive HL. Imbalance issues	24h Gentamicin
BGent-2	21	F	L	Mild high-frequency SNHL. Mild imbalance, chronic tinnitus	24h Gentamicin
BGent-3	75	F	L	R mild-mod SNHL, L profound SNHL, Mild imbalance. Fractionated radiation therapy (Dec 2014-Jan 2015), sample collected after 2.5 yrs	24h Gentamicin
scRNA-sequencing
scUntr-1	39	M	L	L mild to moderate HiFreq SNHL. No vestibular disorders	None
scUntr-2	46	F	L	Slight subjective HL. Mild imbalance, tinnitus	None
scCtrl-1	50	M	R	No dizziness, R tinnitus	24h Control
scCtrl-2	61	M	L	High-frequency HL progressive (L no hearing). No vesibular disorders	24h Control
scGent-1	56	M	L	L SNHL. Mild imbalance and dizziness	24h Gentamicin
scGent-2	46	F	L	L HL. Dizziness, L chronic tinnitus	24h Gentamicin
SEM, histochemistry, and in situ hybridization
Ctrl-1	40	F	L	L HL, tinnitus	24h Control
Ctrl-2	54	M	R	R aural fullness, HL, tinnitus. No vesibular disorders	24h Control
Ctrl-3	43	M	L	L mild to moderately severe SNHL. No vestibular disorders	24h Control
Ctrl-4	39	F	L	L moderate SSNHL	24h Control
Ctrl-5	43	F	R	Rt HL, Vestibular symptoms (mild imbalance)	24h Control
Ctrl-6	44	F	L	L HL. Mild imbalance and vertigo, tinnitus	24h Control
Ctrl-7	43	F	L	Mild imbalance (L-sided vestibular hypofunction)	24h Control
Gent-1	53	F	R	R peripheral vestibulopathy, HL	24h Gentamicin
Gent-2	48	M	R	Rt HL, occasional tinnitus	24h Gentamicin
Gent-3	64	M	L	Lt mild sloping to severe Hifreq HL, ringing	24h Gentamicin
Gent-4	38	F	R	Rt severe to mild SNHL, Rt caloric weakness (balance problems)	24h Gentamicin
Gent-5	26	F	L	Asymmetrical HL (L mild to moderate SNHL)	24h Gentamicin
Gent-6	32	F	R	R progressive HL	24h Gentamicin
Gent-7	56	M	L	R mild high-frequency SNHL, L mild-severe SNHL. Tinnitus symptoms, L peripheral vestibular weakness	24h Gentamicin
Gent-8	42	M	L	L progressive SNHL. Dizziness, mild imbalance	24h Gentamicin
Untr-1	33	F	L	L hearing absent, balance good but needs more ambulation	None
Untr-2	62	M	R	R anacusis. Mild imbalance	None
Untr-3	33	F	R	R decreased hearing. Acute vertigo, R Tinnitus	None
Untr-4	39	M	R	Bal slight veering but good	None
Untr-5	32	F	R	R moderate/severe sensorineural HL	None
Untr-6	35	M	L	R ear hearing absent, balance good	None
Untr-7	56	F	L	Dizziness + imbalance Pre-OP + L HL, ringing, pressure	None
Untr-8	54	M	R	Slight R HL. R tinnitus	None
Untr-9	29	F	R	Slight R HL. Occasional dizziness	None
Untr-10	38	F	R	R mild SNHL and tinnitus	None
Untr-11	42	F	R	R progressive-moderate SNHL. Mild imbalance and occasional dizzeness. Positional vertigo. R chronic mild tinnitus.	None
Untr-12	46	F	R	R mild high frequency HL and tinnitus	None
Untr-13	43	M	R	R mild-to-severe SNHL and tinnitus	None
Untr-14	45	F	R	R severe SNHL and tinnitus. Mild dizziness	None
Untr-15	40	M	L	L mild HL. Occasional tinnutus and dizziness	None
Untr-16	41	F	R	R severe HL and tinnitus. L HL mild high-fr SNHL. Dizziness	None
Untr-17	52	M	L	L mild mixed HL	None
Untr-18	66	F	L	L moderate sloping to profound predominatly mixed HL. R mild sloping to moderate mid to high frequency SNHL. Intermitted dizziness and imbalance, possibly vertigo	None
