# Supplementary material for: Revealing heterogeneity and damage response in the adult human utricle
Source: Research Square preprint supplement (doi:10.21203/rs.3.rs-3649756/v1), 2024-03-11
Supplement: Supplementary file 11 [file c48196b6e91360106957688a.xlsx]

## Sheet: Table S5. Bulk RNA-seq (DEGs)
Table S5. Differential expression analysis between control and gentamicin-treated utricles (n=3) detected via bulk RNA-seq. FDR (false discovery rate) threshold of .05. Related to Figure 6c and Figure 6d.
Colours are matched to Figure 6c gene expression scale colours. Transcription factors (TF) were detected using AnimalTFDB 3.0, druggable targets using DGIdb 4.0.
Gene	TF	p_val	baseMean	log2FC	lfcSE	stat	p_val_adj	Class	Drug
HP	non-TF	2.26599e-08	175.466	-6.62524	1.18512	-5.59036	7.6646e-05	Down in Treated group	TRUE
NBAT1	non-TF	0.000103948	33.7167	-5.9074	1.52206	-3.88119	0.0355967	Down in Treated group
RP11-156P1.2	non-TF	7.8172e-05	44.2049	-4.3036	1.08954	-3.94994	0.0290644	Down in Treated group
TNFAIP8L3	non-TF	8.93148e-11	42.7192	-4.25835	0.656746	-6.48401	1.16225e-06	Down in Treated group
ANGPTL4	non-TF	5.44737e-06	59.8882	-3.78845	0.833218	-4.54678	0.00506333	Down in Treated group
DDIT4	non-TF	1.4819e-05	169.697	-3.75165	0.866159	-4.33136	0.0101494	Down in Treated group	TRUE
C10orf10	non-TF	2.88462e-05	338.006	-3.45241	0.825463	-4.18239	0.0176751	Down in Treated group
JAKMIP2	non-TF	2.8648e-06	62.0122	-3.37152	0.720367	-4.68028	0.00310664	Down in Treated group
CSRNP3	TF	9.75025e-06	115.176	-3.32691	0.752244	-4.42264	0.007847	Down in Treated group	TRUE
RAD17P1	non-TF	7.67248e-05	43.4509	-2.95206	0.746523	-3.95441	0.0290644	Down in Treated group
SLPI	non-TF	5.18607e-05	266.879	-2.93473	0.725148	-4.04708	0.0241022	Down in Treated group	TRUE
ZBTB8B	TF	8.11799e-07	39.9484	-2.77414	0.56242	-4.93251	0.00109076	Down in Treated group
KCNS3	non-TF	0.000123318	31.4404	-2.71521	0.70719	-3.83943	0.0401186	Down in Treated group	TRUE
RHOU	non-TF	1.76452e-07	328.624	-2.71108	0.519108	-5.22258	0.000382694	Down in Treated group
MPV17L	non-TF	3.56087e-05	54.3455	-2.6109	0.631526	-4.13427	0.0191496	Down in Treated group
SMOC1	non-TF	8.57113e-05	195.666	-2.37859	0.605572	-3.92784	0.0309823	Down in Treated group
KIAA1549L	non-TF	9.55435e-06	181.587	-1.62545	0.367167	-4.42702	0.007847	Down in Treated group
ERO1L	non-TF	3.67893e-05	300.633	-1.38702	0.336103	-4.12677	0.0191496	Down in Treated group
ERMP1	non-TF	0.000102245	110.952	-1.33621	0.343924	-3.8852	0.0355967	Down in Treated group
TCERG1	non-TF	1.02512e-05	206.401	1.34233	0.30426	4.41181	0.007847	Up in Treated group
EIF2B2	non-TF	5.90661e-05	185.46	1.38789	0.345547	4.01651	0.0265044	Up in Treated group
MTO1	non-TF	9.09968e-07	160.995	1.74773	0.35594	4.91017	0.00109076	Up in Treated group
CRABP2	non-TF	7.63257e-05	257.629	1.94263	0.491101	3.95565	0.0290644	Up in Treated group	TRUE
NES	non-TF	3.89042e-05	1251.22	1.95645	0.475572	4.11389	0.0194715	Up in Treated group
AEN	non-TF	3.01975e-05	607.079	1.9678	0.471672	4.17197	0.0176751	Up in Treated group
RP11-513I15.6	non-TF	6.26712e-05	523.097	2.07588	0.518643	4.00252	0.0271847	Up in Treated group
SLC35F2	non-TF	0.000175101	180.464	2.11133	0.562649	3.75247	0.0484806	Up in Treated group
FZD8	non-TF	0.000139213	62.0691	2.18245	0.572887	3.80956	0.0438144	Up in Treated group	TRUE
RP11-166D19.1	non-TF	0.000151921	812.534	2.2193	0.585892	3.78791	0.0453734	Up in Treated group
SNHG15	non-TF	0.000141413	208.923	2.41573	0.63477	3.80568	0.0438144	Up in Treated group
PGBD5	non-TF	7.07137e-05	46.5445	2.47842	0.623679	3.97387	0.0290644	Up in Treated group
PDE4B	non-TF	4.37556e-05	205.191	2.59984	0.63617	4.0867	0.0210886	Up in Treated group	TRUE
TAGLN3	non-TF	1.26803e-08	430.88	2.69271	0.473209	5.69032	7.6646e-05	Up in Treated group
JUN	TF	2.35598e-08	1601.5	2.69931	0.483435	5.58359	7.6646e-05	Up in Treated group	TRUE
RELB	TF	0.000156905	92.7339	2.97725	0.787657	3.77988	0.0453734	Up in Treated group
EPB41L4A-AS1	non-TF	7.65109e-07	196.833	2.97957	0.602656	4.94406	0.00109076	Up in Treated group
SH2D5	non-TF	0.000162095	1013.75	3.10899	0.824281	3.77177	0.0458554	Up in Treated group	TRUE
ITPRIP	non-TF	0.000154745	114.582	3.15788	0.834683	3.78333	0.0453734	Up in Treated group
ATF3	TF	0.000113826	193.558	3.36305	0.871469	3.85905	0.0379801	Up in Treated group	TRUE
LY6K	non-TF	9.15468e-07	30.4154	3.71654	0.757089	4.90899	0.00109076	Up in Treated group
AC058791.1	non-TF	1.26623e-05	369.075	4.1693	0.954978	4.36586	0.00915411	Up in Treated group
VGF	non-TF	7.69316e-08	36.4426	4.66466	0.867976	5.37418	0.000200222	Up in Treated group
ADAMTS4	non-TF	4.15915e-06	104.81	4.70928	1.02303	4.60327	0.00416331	Up in Treated group	TRUE
ATP1A2	non-TF	7.2757e-05	93.6233	5.05347	1.27385	3.96709	0.0290644	Up in Treated group	TRUE
COCH	non-TF	3.12402e-05	323.717	5.19136	1.24665	4.16423	0.0176751	Up in Treated group
CSF1	non-TF	9.22025e-07	103.823	5.40257	1.10086	4.90759	0.00109076	Up in Treated group	TRUE
ZP2	non-TF	1.95051e-05	30.8956	8.86331	2.07548	4.27048	0.012691	Up in Treated group
