# Supplementary material for: Revealing heterogeneity and damage response in the adult human utricle
Source: Research Square preprint supplement (doi:10.21203/rs.3.rs-3649756/v1), 2024-03-11
Supplement: Supplementary file 12 [file d07a6731873051a63bb90e94.xlsx]

## Sheet: Table S3. Top 50 genes
Table S3. Top 50 DEGs from an untreated utricle (scUntr-2). Wilcoxon rank-sum test, with a Bonferroni Padj < .05. Related to Figure 2.
Colours are matched to Figure 2a and 2b cluster colours. Transcription factors (TF) were detected using AnimalTFDB 3.0, druggable genes using DGIdb 4.0.
Gene	TF	p_val	avg_log2FC	pct.1	pct.2	p_val_adj	Cluster	Drug
CIB3	non-TF	1.40121e-73	5.05599	0.676	0.047	2.12423e-69	TypeI-HC
PPP1R27	non-TF	2.00153e-160	4.63139	0.956	0.02	3.03432e-156	TypeI-HC
PCP4	non-TF	1.27121e-152	4.31096	0.956	0.024	1.92715e-148	TypeI-HC
SCGB2A1	non-TF	2.93643e-133	4.12255	0.956	0.036	4.45163e-129	TypeI-HC
OCM	non-TF	4.58118e-144	3.97362	0.838	0.014	6.94507e-140	TypeI-HC
ADAM11	non-TF	4.39419e-167	3.96654	0.926	0.012	6.66158e-163	TypeI-HC
FAM183A	non-TF	3.98024e-136	3.84243	0.956	0.036	6.03404e-132	TypeI-HC
SNCG	non-TF	1.74843e-141	3.82192	0.912	0.026	2.65062e-137	TypeI-HC
CABP2	non-TF	3.35484e-129	3.73517	0.882	0.03	5.08593e-125	TypeI-HC
SYT14	non-TF	4.28025e-120	3.5686	0.838	0.03	6.48886e-116	TypeI-HC
GPX2	non-TF	6.23738e-100	3.42409	0.897	0.063	9.45586e-96	TypeI-HC
CIB2	non-TF	7.22912e-119	3.38289	0.897	0.041	1.09593e-114	TypeI-HC
C1orf232	non-TF	5.62504e-104	3.31638	0.868	0.05	8.52755e-100	TypeI-HC
ABCA5	non-TF	2.2648e-57	3.2722	0.956	0.225	3.43344e-53	TypeI-HC	TRUE
ERICH3	non-TF	7.64306e-128	3.25055	0.765	0.014	1.15869e-123	TypeI-HC	TRUE
SMPX	non-TF	1.449e-42	3.07712	0.971	0.408	2.19669e-38	TypeI-HC
RSPH1	non-TF	9.84974e-70	3.05743	0.912	0.129	1.49322e-65	TypeI-HC
PGA5	non-TF	1.50346e-137	3.04278	0.794	0.012	2.27925e-133	TypeI-HC	TRUE
C20orf85	non-TF	3.45939e-112	3.03759	0.765	0.024	5.24444e-108	TypeI-HC
CRIP3	non-TF	1.10195e-101	2.95003	0.765	0.032	1.67055e-97	TypeI-HC
PKIB	non-TF	4.27207e-99	2.91779	0.75	0.032	6.47646e-95	TypeI-HC
AP3S1	non-TF	5.44657e-82	2.90794	0.882	0.087	8.257e-78	TypeI-HC
CD164L2	non-TF	3.6588e-99	2.87664	0.779	0.036	5.54674e-95	TypeI-HC
CAMK2N1	non-TF	3.15817e-50	2.82662	0.809	0.152	4.78779e-46	TypeI-HC
ESPN	non-TF	1.48621e-97	2.82614	0.765	0.037	2.25309e-93	TypeI-HC
VSIG10L2	non-TF	2.91495e-117	2.82461	0.632	0.006	4.41907e-113	TypeI-HC
MINDY4B	non-TF	2.07144e-98	2.73713	0.765	0.032	3.14031e-94	TypeI-HC
ENC1	non-TF	2.09188e-113	2.64375	0.75	0.021	3.1713e-109	TypeI-HC
PTRH1	non-TF	3.71041e-59	2.5666	0.838	0.122	5.62498e-55	TypeI-HC
CHGA	non-TF	5.93854e-95	2.52786	0.618	0.016	9.00282e-91	TypeI-HC
ATP2B2	non-TF	3.23118e-119	2.52278	0.618	0.003	4.89847e-115	TypeI-HC
ELMOD1	non-TF	1.07389e-101	2.51137	0.676	0.019	1.62802e-97	TypeI-HC
SYT1	non-TF	2.68288e-108	2.49235	0.647	0.011	4.06724e-104	TypeI-HC	TRUE
EFHD2	non-TF	4.24002e-64	2.48433	0.721	0.071	6.42786e-60	TypeI-HC
KIF9	non-TF	8.64123e-49	2.45716	0.809	0.152	1.31001e-44	TypeI-HC
CHGB	non-TF	1.57578e-91	2.3773	0.544	0.009	2.38888e-87	TypeI-HC
LMO7	non-TF	8.00385e-38	2.3721	0.765	0.175	1.21338e-33	TypeI-HC
DNAJC5B	non-TF	6.0886e-81	2.36453	0.603	0.023	9.23032e-77	TypeI-HC
CCDC68	non-TF	1.41923e-42	2.35687	0.824	0.189	2.15155e-38	TypeI-HC
C5orf49	non-TF	3.66725e-77	2.35663	0.676	0.039	5.55956e-73	TypeI-HC
CALM1	non-TF	8.02063e-37	2.28847	0.971	0.472	1.21593e-32	TypeI-HC	TRUE
CCDC28B	non-TF	1.55699e-52	2.27855	0.706	0.089	2.36039e-48	TypeI-HC
BBOF1	non-TF	6.37753e-52	2.24743	0.706	0.091	9.66834e-48	TypeI-HC
C9orf116	non-TF	2.50901e-68	2.24572	0.618	0.038	3.80365e-64	TypeI-HC
SHTN1	non-TF	1.34991e-37	2.22422	0.809	0.205	2.04646e-33	TypeI-HC
MYO6	non-TF	6.67643e-32	2.21484	0.941	0.446	1.01215e-27	TypeI-HC
CAMK2B	non-TF	1.93914e-76	2.21462	0.574	0.022	2.93974e-72	TypeI-HC	TRUE
HOPX	TF	2.90872e-39	2.21195	0.838	0.201	4.40962e-35	TypeI-HC
TMIE	non-TF	1.87435e-71	2.18663	0.515	0.018	2.84152e-67	TypeI-HC
WDR25	non-TF	4.14227e-49	2.1753	0.676	0.09	6.27968e-45	TypeI-HC
CXCL14	non-TF	2.62268e-24	5.1019	1	0.207	3.97599e-20	TypeII-HC
CALB1	non-TF	6.38015e-126	4.77656	0.947	0.012	9.67231e-122	TypeII-HC
OTOF	non-TF	2.3967e-66	3.06499	0.947	0.038	3.6334e-62	TypeII-HC
SCG3	non-TF	6.26403e-69	3.02461	1	0.042	9.49627e-65	TypeII-HC
NPY	non-TF	1.52955e-17	2.64632	0.263	0.012	2.3188e-13	TypeII-HC	TRUE
CPE	non-TF	3.66378e-42	2.35186	0.842	0.052	5.55429e-38	TypeII-HC
PGM2L1	non-TF	5.64994e-14	2.25167	0.632	0.109	8.5653e-10	TypeII-HC
C2orf80	non-TF	3.57108e-66	2.2268	0.789	0.023	5.41376e-62	TypeII-HC
SRI	non-TF	1.34376e-12	2.12745	1	0.427	2.03715e-08	TypeII-HC	TRUE
FAM81B	non-TF	1.23909e-46	2.09144	0.684	0.027	1.87846e-42	TypeII-HC
CETN2	non-TF	2.80118e-12	2.0111	1	0.386	4.24659e-08	TypeII-HC
C11orf97	non-TF	3.12383e-44	1.96991	0.789	0.041	4.73573e-40	TypeII-HC
AC022182.2	non-TF	2.63411e-66	1.89278	0.684	0.016	3.99331e-62	TypeII-HC
C1orf194	non-TF	2.88414e-31	1.87717	0.684	0.046	4.37236e-27	TypeII-HC
CFAP157	non-TF	1.86254e-42	1.87469	0.737	0.037	2.82361e-38	TypeII-HC
TPM1	non-TF	2.87097e-11	1.80447	0.842	0.225	4.35239e-07	TypeII-HC
AC004540.2	non-TF	1.26641e-13	1.8009	0.632	0.102	1.91988e-09	TypeII-HC
STAU2	non-TF	7.42204e-16	1.78269	0.474	0.05	1.12518e-11	TypeII-HC
CALCB	non-TF	2.11803e-33	1.77206	0.316	0.006	3.21093e-29	TypeII-HC	TRUE
RSPO3	non-TF	5.12907e-37	1.7512	0.684	0.037	7.77568e-33	TypeII-HC	TRUE
STRC	non-TF	3.0486e-30	1.73706	0.632	0.04	4.62168e-26	TypeII-HC
DNAAF1	non-TF	2.50071e-24	1.73136	0.579	0.043	3.79107e-20	TypeII-HC
LRRIQ1	non-TF	2.37933e-15	1.72062	0.526	0.061	3.60707e-11	TypeII-HC
CCT2	non-TF	3.46408e-17	1.71184	0.842	0.15	5.25154e-13	TypeII-HC
POU4F3	TF	4.86633e-43	1.70165	0.632	0.025	7.37735e-39	TypeII-HC
CYB5R1	non-TF	4.14403e-11	1.68136	0.789	0.209	6.28235e-07	TypeII-HC	TRUE
LYPLA2	non-TF	3.46742e-20	1.67184	0.737	0.093	5.25662e-16	TypeII-HC
ATP6V1F	non-TF	3.3488e-10	1.6682	1	0.531	5.07678e-06	TypeII-HC
LMO1	non-TF	2.01232e-23	1.61814	0.474	0.031	3.05068e-19	TypeII-HC
CCDC146	non-TF	2.58729e-25	1.61673	0.684	0.058	3.92233e-21	TypeII-HC
OTOL1	non-TF	1.31106e-17	0.904792	0.787	0.66	1.98757e-13	SC-1
MT-CO3	non-TF	2.63674e-65	0.627726	1	0.998	3.9973e-61	SC-1
SYNE2	non-TF	7.62106e-06	0.596831	0.548	0.485	0.115535	SC-1
MT-ND3	non-TF	6.41264e-40	0.577937	0.997	0.994	9.72156e-36	SC-1	TRUE
MT-CO2	non-TF	1.38051e-66	0.573882	1	0.998	2.09286e-62	SC-1	TRUE
SLITRK6	non-TF	0.0040644	0.565418	0.297	0.237	1	SC-1	TRUE
OTOGL	non-TF	0.000243231	0.547172	0.435	0.356	1	SC-1
SORL1	non-TF	0.000186786	0.536839	0.513	0.465	1	SC-1
MT-CO1	non-TF	1.00577e-44	0.513658	1	0.997	1.52474e-40	SC-1	TRUE
MT-ATP6	non-TF	2.50334e-44	0.50614	1	0.998	3.79507e-40	SC-1
SPARCL1	non-TF	2.78078e-11	0.491301	0.916	0.816	4.21567e-07	SC-1
SPARC	non-TF	0.00200424	0.472489	0.545	0.516	1	SC-1	TRUE
STT3B	non-TF	0.00435265	0.468507	0.15	0.094	1	SC-1
MT-ND1	non-TF	1.44904e-19	0.465791	0.988	0.974	2.19675e-15	SC-1	TRUE
ZBTB20	TF	3.92287e-08	0.458953	0.836	0.779	0.000594707	SC-1
CHL1	non-TF	0.00973713	0.452531	0.372	0.332	1	SC-1
MT-CYB	non-TF	1.1428e-37	0.44823	1	0.995	1.73249e-33	SC-1
SORBS2	non-TF	0.000121389	0.416077	0.669	0.673	1	SC-1
MT-ND4	non-TF	1.21093e-28	0.399075	1	1	1.83576e-24	SC-1	TRUE
MT-ND4L	non-TF	0.00128594	0.393572	0.703	0.729	1	SC-1	TRUE
MT-ND2	non-TF	5.6421e-18	0.383476	0.997	0.987	8.55342e-14	SC-1	TRUE
MT-ND5	non-TF	1.86558e-17	0.376077	0.983	0.968	2.82821e-13	SC-1	TRUE
OTOG	non-TF	1.76207e-05	0.363811	0.879	0.792	0.267129	SC-1
MT-ND6	non-TF	0.0069894	0.33344	0.735	0.777	1	SC-1	TRUE
GSN	non-TF	0.00460823	0.313683	0.746	0.752	1	SC-1
PAQR6	non-TF	0.00133917	0.301093	0.784	0.748	1	SC-1
PPP2R2B	non-TF	0.0020576	0.296301	0.605	0.547	1	SC-1
KRT19	non-TF	4.15062e-14	1.11972	0.632	0.421	6.29235e-10	SC-2	TRUE
GFAP	non-TF	4.39256e-11	0.773568	0.727	0.61	6.65912e-07	SC-2	TRUE
STMN1	non-TF	4.61848e-11	0.667554	0.71	0.545	7.00162e-07	SC-2	TRUE
APOE	non-TF	1.53918e-06	0.660654	0.186	0.079	0.0233339	SC-2	TRUE
NEAT1	non-TF	9.23071e-05	0.646983	0.377	0.258	1	SC-2
IGFBP5	non-TF	2.30269e-05	0.625093	0.312	0.183	0.349088	SC-2	TRUE
ID3	TF	3.9304e-07	0.616189	0.606	0.481	0.00595849	SC-2
ELF3	TF	0.00279587	0.565815	0.355	0.262	1	SC-2
CYR61	non-TF	2.63994e-06	0.553222	0.221	0.105	0.0400215	SC-2
SAT1	non-TF	0.000104683	0.540241	0.558	0.467	1	SC-2
CSRP2	non-TF	2.1201e-08	0.539233	0.74	0.596	0.000321407	SC-2
LGALS3	non-TF	7.95421e-05	0.53465	0.255	0.148	1	SC-2	TRUE
TPD52L1	non-TF	1.93012e-08	0.52923	0.675	0.508	0.000292607	SC-2
DLX5	TF	0.000132078	0.518159	0.333	0.216	1	SC-2
IFITM3	non-TF	0.0014097	0.517928	0.268	0.183	1	SC-2
AGR3	non-TF	2.75681e-05	0.51617	0.61	0.505	0.417933	SC-2
CMPK1	non-TF	0.00209371	0.500826	0.199	0.124	1	SC-2	TRUE
RBP1	non-TF	1.94366e-06	0.489013	0.662	0.52	0.0294658	SC-2
FOS	TF	0.000109167	0.481016	0.736	0.635	1	SC-2	TRUE
GPHA2	non-TF	0.00613552	0.470283	0.1	0.05	1	SC-2
SPP1	non-TF	0.000368574	0.468377	0.234	0.14	1	SC-2	TRUE
ID1	TF	9.31518e-11	0.468373	0.905	0.818	1.41218e-06	SC-2
GADD45G	non-TF	0.0088252	0.449486	0.16	0.102	1	SC-2	TRUE
ANXA2	non-TF	7.16152e-05	0.433584	0.706	0.596	1	SC-2	TRUE
S100A11	non-TF	8.86594e-08	0.428924	0.81	0.662	0.00134408	SC-2
AKR1C2	non-TF	0.00125326	0.420479	0.126	0.061	1	SC-2	TRUE
TSPYL4	non-TF	0.00953796	0.420364	0.19	0.125	1	SC-2
MYO9B	non-TF	0.00844416	0.415904	0.126	0.072	1	SC-2	TRUE
VEPH1	non-TF	0.0065336	0.413607	0.429	0.349	1	SC-2
IRX3	TF	0.000664165	0.409544	0.333	0.231	1	SC-2
ALDH2	non-TF	0.000416956	0.40867	0.545	0.454	1	SC-2	TRUE
DDX5	non-TF	1.03812e-06	0.396813	0.823	0.728	0.0157379	SC-2	TRUE
LDHA	non-TF	0.00269678	0.395705	0.342	0.25	1	SC-2	TRUE
EPHX1	non-TF	0.00038034	0.39021	0.593	0.512	1	SC-2	TRUE
H2AFJ	non-TF	0.00177693	0.384559	0.476	0.374	1	SC-2
B2M	non-TF	2.35283e-05	0.383738	0.922	0.878	0.356689	SC-2	TRUE
JUN	TF	2.1879e-07	0.383605	0.883	0.779	0.00331686	SC-2	TRUE
HIST1H1E	non-TF	0.00417632	0.382665	0.238	0.158	1	SC-2
MID1IP1	non-TF	0.00600177	0.376218	0.152	0.091	1	SC-2
SELENOM	non-TF	1.55143e-05	0.371025	0.823	0.783	0.235197	SC-2
DNAJB9	non-TF	0.00811215	0.369225	0.13	0.075	1	SC-2
CLU	non-TF	0.000105555	0.369193	0.632	0.501	1	SC-2	TRUE
CRYL1	non-TF	0.00895999	0.366761	0.377	0.299	1	SC-2
IFI27	non-TF	1.77723e-05	0.364523	0.714	0.613	0.269429	SC-2	TRUE
IRF2	TF	0.0024531	0.364279	0.316	0.223	1	SC-2	TRUE
EIF5	non-TF	0.0029716	0.361663	0.55	0.474	1	SC-2
ANXA3	non-TF	0.00145491	0.360874	0.1	0.045	1	SC-2
DLX6	TF	1.40867e-05	0.358165	0.177	0.077	0.213554	SC-2
SOX2	TF	0.00416171	0.34626	0.649	0.572	1	SC-2
LGALS1	non-TF	0.00204128	0.333211	0.152	0.083	1	SC-2	TRUE
HHATL	non-TF	2.64102e-18	0.979153	0.606	0.286	4.00379e-14	SC-3
PTN	non-TF	8.49022e-29	0.905095	0.972	0.798	1.28712e-24	SC-3
JUNB	TF	2.47798e-14	0.746046	0.778	0.465	3.75662e-10	SC-3	TRUE
SCRG1	non-TF	1.69431e-13	0.736001	0.6	0.309	2.56858e-09	SC-3
SNORC	non-TF	1.78183e-18	0.719077	0.956	0.677	2.70125e-14	SC-3
AGR2	non-TF	1.36448e-20	0.713919	0.95	0.781	2.06855e-16	SC-3
CCDC80	non-TF	1.9788e-09	0.641994	0.561	0.329	2.99985e-05	SC-3
GADD45B	non-TF	1.26806e-10	0.637467	0.439	0.208	1.92237e-06	SC-3
HSPA5	non-TF	3.66961e-15	0.615159	0.911	0.751	5.56313e-11	SC-3	TRUE
FGFBP2	non-TF	2.71603e-08	0.598335	0.25	0.099	0.000411751	SC-3
PLP1	non-TF	2.49363e-06	0.56351	0.506	0.328	0.0378035	SC-3
MANSC4	non-TF	5.3707e-16	0.545923	0.261	0.061	8.14197e-12	SC-3
HEPN1	non-TF	2.85936e-10	0.530707	0.411	0.186	4.33479e-06	SC-3
MIA	non-TF	1.07012e-14	0.527194	0.994	0.831	1.6223e-10	SC-3	TRUE
MYOZ1	non-TF	8.82485e-07	0.499097	0.261	0.117	0.0133785	SC-3
SEMA6A	non-TF	7.35246e-07	0.496381	0.283	0.135	0.0111463	SC-3
ALDH1A1	non-TF	1.41668e-07	0.495372	0.661	0.45	0.00214768	SC-3	TRUE
PSAT1	non-TF	3.48683e-12	0.48852	0.294	0.094	5.28604e-08	SC-3
RBP7	non-TF	5.10361e-09	0.487853	0.294	0.121	7.73708e-05	SC-3
TFAP2A	TF	2.8017e-09	0.480221	0.178	0.05	4.24738e-05	SC-3	TRUE
PIP4P2	non-TF	5.28441e-07	0.477926	0.3	0.142	0.00801116	SC-3
HEY1	TF	2.42878e-08	0.471932	0.411	0.207	0.000368203	SC-3
TAOK3	non-TF	2.35193e-08	0.465751	0.383	0.189	0.000356553	SC-3	TRUE
MT1E	non-TF	1.10379e-06	0.462929	0.3	0.15	0.0167334	SC-3	TRUE
BMP7	non-TF	2.99306e-06	0.459052	0.406	0.236	0.0453749	SC-3	TRUE
RPL29	non-TF	6.90694e-10	0.457227	0.933	0.784	1.04709e-05	SC-3
PDIA6	non-TF	1.31797e-06	0.456267	0.722	0.53	0.0199804	SC-3
PRLH	non-TF	2.54921e-12	0.452028	0.244	0.067	3.8646e-08	SC-3
PCSK1N	non-TF	1.44421e-07	0.451779	0.744	0.518	0.00218942	SC-3
NFKBIA	non-TF	3.40056e-07	0.447729	0.711	0.483	0.00515524	SC-3	TRUE
AIF1L	non-TF	6.41885e-08	0.447661	0.7	0.442	0.000973097	SC-3
RPN2	non-TF	3.50189e-06	0.446066	0.611	0.429	0.0530886	SC-3
SAR1B	non-TF	8.54641e-08	0.444174	0.25	0.102	0.00129564	SC-3
PLAT	non-TF	2.13439e-07	0.435828	0.183	0.064	0.00323574	SC-3	TRUE
LRPAP1	non-TF	7.77947e-08	0.434189	0.833	0.62	0.00117937	SC-3
POLR2E	non-TF	0.000781807	0.431511	0.2	0.111	1	SC-3
GTF3C6	non-TF	8.69707e-06	0.429381	0.594	0.404	0.131848	SC-3
IER2	non-TF	3.65043e-08	0.427499	0.856	0.657	0.000553406	SC-3
PSMA4	non-TF	3.31448e-06	0.426303	0.433	0.253	0.0502476	SC-3	TRUE
VANGL1	non-TF	0.00273293	0.425204	0.1	0.046	1	SC-3
OTOA	non-TF	9.2158e-07	0.418144	0.4	0.222	0.0139712	SC-3
MEA1	non-TF	2.46689e-07	0.416397	0.411	0.219	0.00373981	SC-3
SRRM1	non-TF	5.26706e-07	0.414821	0.744	0.544	0.00798486	SC-3
H2AFX	non-TF	6.58082e-05	0.414747	0.211	0.104	0.997653	SC-3
HNRNPA2B1	non-TF	6.43965e-06	0.413907	0.633	0.446	0.0976251	SC-3
IGFBP7	non-TF	2.52326e-08	0.413504	0.933	0.69	0.000382526	SC-3
DHRS7	non-TF	2.09569e-07	0.413303	0.861	0.654	0.00317707	SC-3
SEC11C	non-TF	6.42579e-09	0.413181	0.85	0.609	9.7415e-05	SC-3
AES	non-TF	0.000406199	0.410444	0.356	0.224	1	SC-3
SLC44A3	non-TF	1.88167e-07	0.410359	0.311	0.144	0.0028526	SC-3
NDUFA3	non-TF	3.38707e-10	1.07408	1	0.393	5.1348e-06	SC-4	TRUE
C4orf48	non-TF	5.63737e-10	1.06664	1	0.602	8.54625e-06	SC-4
BLOC1S1	non-TF	5.90965e-10	1.00951	1	0.602	8.95903e-06	SC-4
TMEM205	non-TF	3.09318e-10	1.00836	1	0.608	4.68927e-06	SC-4
RPS21	non-TF	5.74047e-10	1.00248	1	0.614	8.70255e-06	SC-4
UQCR10	non-TF	3.07364e-10	1.0001	1	0.643	4.65963e-06	SC-4	TRUE
SERF2	non-TF	5.32035e-14	0.998759	1	0.939	8.06564e-10	SC-4
ELOB	non-TF	3.23768e-10	0.988158	1	0.76	4.90832e-06	SC-4
ATP5MC2	non-TF	1.22385e-10	0.96887	1	0.793	1.85536e-06	SC-4
EEF1D	non-TF	4.14807e-10	0.965448	1	0.737	6.28848e-06	SC-4
RPL23A	non-TF	8.23558e-14	0.952716	1	0.887	1.24851e-09	SC-4
CSTB	non-TF	1.75859e-10	0.946818	1	0.674	2.66603e-06	SC-4
RPS27	non-TF	3.98756e-12	0.929474	1	0.898	6.04515e-08	SC-4
ATP5ME	non-TF	1.31542e-06	0.918845	1	0.642	0.0199417	SC-4
SEC61B	non-TF	7.39537e-10	0.916051	1	0.704	1.12114e-05	SC-4
BRICD5	non-TF	1.03822e-08	0.909656	1	0.725	0.000157394	SC-4
UBL5	non-TF	7.95855e-09	0.90693	1	0.783	0.000120652	SC-4
C12orf57	non-TF	1.89438e-08	0.898693	1	0.431	0.000287188	SC-4
PIN4	non-TF	3.8617e-10	0.896762	0.929	0.313	5.85434e-06	SC-4
RPLP0	non-TF	4.42865e-09	0.891916	1	0.659	6.71383e-05	SC-4
NDUFA13	non-TF	5.35632e-09	0.891786	1	0.483	8.12018e-05	SC-4	TRUE
COX8A	non-TF	9.8572e-08	0.890229	1	0.661	0.00149435	SC-4
NDUFB4	non-TF	8.21721e-09	0.887836	1	0.645	0.000124573	SC-4	TRUE
FXYD3	non-TF	1.48499e-09	0.886957	1	0.783	2.25125e-05	SC-4
PNKD	non-TF	7.47894e-09	0.88087	1	0.541	0.000113381	SC-4
NDUFC1	non-TF	8.58367e-08	0.879958	1	0.671	0.00130128	SC-4	TRUE
RPLP1	non-TF	3.2264e-15	0.868279	1	0.988	4.89122e-11	SC-4
UQCRQ	non-TF	3.21138e-08	0.863383	1	0.768	0.000486845	SC-4
LIPE-AS1	non-TF	4.37331e-16	0.862036	0.929	0.2	6.62994e-12	SC-4
ROMO1	non-TF	2.5825e-06	0.860944	1	0.513	0.0391507	SC-4
SH3BGRL3	non-TF	6.10246e-09	0.854756	1	0.395	9.25132e-05	SC-4
NDUFS6	non-TF	7.04955e-07	0.853735	1	0.542	0.0106871	SC-4	TRUE
LAMTOR4	non-TF	1.37725e-07	0.853573	1	0.546	0.00208791	SC-4
UQCR11	non-TF	5.84386e-07	0.851279	1	0.642	0.00885929	SC-4
COMMD6	non-TF	7.75621e-08	0.842324	1	0.588	0.00117584	SC-4
HIST1H4C	non-TF	2.30888e-08	0.841496	1	0.814	0.000350027	SC-4
COX7A1	non-TF	1.75003e-10	0.839153	1	0.328	2.65305e-06	SC-4
TSTD1	non-TF	6.2003e-08	0.837142	1	0.744	0.000939966	SC-4
HIGD2A	non-TF	4.18297e-08	0.826523	0.964	0.436	0.000634139	SC-4
TOMM7	non-TF	4.13882e-09	0.825654	1	0.806	6.27446e-05	SC-4
ATRAID	non-TF	4.99613e-08	0.82484	1	0.536	0.000757413	SC-4
PFDN5	non-TF	7.11418e-11	0.82396	1	0.814	1.07851e-06	SC-4
MRPL41	non-TF	1.62575e-08	0.822733	1	0.391	0.000246463	SC-4
FTL	non-TF	9.49092e-13	0.822422	1	0.96	1.43882e-08	SC-4
FKBP2	non-TF	3.09398e-09	0.822262	1	0.766	4.69048e-05	SC-4
SEM1	non-TF	5.42673e-07	0.82009	1	0.605	0.00822692	SC-4	TRUE
IFI27L2	non-TF	4.58453e-07	0.819113	1	0.547	0.00695014	SC-4
NDUFB2	non-TF	5.76725e-08	0.817416	1	0.755	0.000874316	SC-4	TRUE
SSR4	non-TF	2.60265e-08	0.810516	1	0.684	0.000394562	SC-4
CTNNB1	non-TF	4.65289e-49	2.65799	0.86	0.141	7.05378e-45	SC-5	TRUE
ZDHHC2	non-TF	1.40524e-19	2.09706	0.667	0.21	2.13035e-15	SC-5
PIGR	non-TF	3.27916e-23	2.03607	0.544	0.111	4.9712e-19	SC-5
ROCR	non-TF	1.56657e-18	1.95648	0.737	0.286	2.37492e-14	SC-5
HNRNPH1	non-TF	2.11514e-18	1.9378	0.684	0.238	3.20655e-14	SC-5
SDC4	non-TF	7.6907e-17	1.85283	0.789	0.39	1.16591e-12	SC-5
LRRC75A	non-TF	3.03831e-10	1.82556	0.333	0.086	4.60607e-06	SC-5
IRF2BPL	non-TF	1.16172e-29	1.79367	0.526	0.075	1.76117e-25	SC-5
EGR1	TF	9.95456e-09	1.78952	0.667	0.414	0.000150911	SC-5	TRUE
PPP3CA	non-TF	1.51475e-22	1.67265	0.719	0.205	2.29636e-18	SC-5	TRUE
CALR	non-TF	2.12386e-15	1.66043	0.825	0.419	3.21977e-11	SC-5	TRUE
F3	non-TF	2.70101e-14	1.60736	0.825	0.426	4.09474e-10	SC-5	TRUE
CHP1	non-TF	1.50041e-11	1.34455	0.702	0.366	2.27462e-07	SC-5
WTAP	non-TF	9.12757e-09	1.30626	0.333	0.098	0.000138374	SC-5
C1orf56	non-TF	0.00070924	1.30348	0.263	0.122	1	SC-5
TSPYL1	non-TF	1.76773e-10	1.28793	0.579	0.241	2.67988e-06	SC-5	TRUE
PPP1CB	non-TF	7.94889e-11	1.27965	0.544	0.201	1.20505e-06	SC-5
INSR	non-TF	6.11458e-13	1.24341	0.404	0.098	9.2697e-09	SC-5	TRUE
ATP1B1	non-TF	7.18871e-11	1.15553	0.842	0.615	1.08981e-06	SC-5	TRUE
APOBEC3C	non-TF	3.55925e-07	1.14429	0.421	0.17	0.00539582	SC-5
CDC42	non-TF	1.72508e-07	1.0986	0.526	0.243	0.00261523	SC-5	TRUE
CDC42SE1	non-TF	2.56587e-09	1.09842	0.298	0.074	3.88986e-05	SC-5
B4GALT1	non-TF	3.78587e-08	1.09477	0.298	0.084	0.000573937	SC-5
MSI1	non-TF	1.72127e-07	1.08365	0.246	0.064	0.00260945	SC-5
PHKG1	non-TF	5.04327e-15	1.07539	0.193	0.018	7.6456e-11	SC-5	TRUE
CBX6	non-TF	1.41522e-07	1.07368	0.544	0.267	0.00214548	SC-5
AC092069.1	non-TF	1.62474e-05	1.01174	0.123	0.024	0.24631	SC-5
AMFR	non-TF	1.10324e-09	0.998662	0.316	0.079	1.67251e-05	SC-5
EIF5A	non-TF	3.08464e-10	0.997676	0.421	0.129	4.67632e-06	SC-5	TRUE
FKBP9	non-TF	2.88746e-05	0.98838	0.246	0.087	0.437739	SC-5
CARMIL1	non-TF	1.05687e-07	0.981106	0.386	0.134	0.00160222	SC-5
BCL11A	TF	4.43499e-06	0.980422	0.281	0.095	0.0672345	SC-5
PADI2	non-TF	1.01413e-05	0.943957	0.456	0.22	0.153742	SC-5	TRUE
AC108673.3	non-TF	8.05531e-17	0.925035	0.228	0.022	1.22118e-12	SC-5
RBM6	non-TF	2.47368e-07	0.903365	0.316	0.1	0.0037501	SC-5
ADAM19	non-TF	2.39432e-10	0.90223	0.246	0.046	3.62979e-06	SC-5
CRIM1	non-TF	3.32261e-10	0.892363	0.246	0.046	5.03708e-06	SC-5
GPRC5B	non-TF	0.00357998	0.860279	0.316	0.171	1	SC-5
DHRS4-AS1	non-TF	0.00830442	0.851453	0.175	0.08	1	SC-5
GAS2	non-TF	0.000221338	0.838471	0.456	0.259	1	SC-5
AC106707.1	non-TF	0.00458439	0.822754	0.14	0.054	1	SC-5
CTTN	non-TF	0.000446308	0.814072	0.368	0.192	1	SC-5
C3orf70	non-TF	3.09812e-06	0.811426	0.175	0.041	0.0469676	SC-5
SERGEF	non-TF	1.70369e-09	0.80683	0.281	0.064	2.5828e-05	SC-5
SAR1A	non-TF	0.00107729	0.803858	0.316	0.165	1	SC-5
ZNF462	TF	1.8423e-07	0.800601	0.404	0.145	0.00279292	SC-5
GIGYF1	non-TF	2.20274e-12	0.800323	0.211	0.027	3.33935e-08	SC-5
SLC12A2	non-TF	2.79036e-06	0.791331	0.281	0.09	0.0423018	SC-5	TRUE
TMEM222	non-TF	0.000521932	0.788071	0.211	0.079	1	SC-5
ACOX1	non-TF	0.000521205	0.782005	0.316	0.153	1	SC-5
CRYAB	non-TF	9.70187e-33	5.55714	0.946	0.263	1.4708e-28	SCLC
ANKRD1	non-TF	5.38073e-91	3.17241	0.459	0.001	8.15719e-87	SCLC
KRT7	non-TF	9.14617e-69	2.4316	0.432	0.005	1.38656e-64	SCLC
VIM	non-TF	1.81409e-17	2.26631	1	0.692	2.75016e-13	SCLC	TRUE
S100A6	non-TF	1.21269e-13	2.07823	1	0.874	1.83843e-09	SCLC
TNFRSF12A	non-TF	1.11535e-10	1.91006	0.541	0.17	1.69087e-06	SCLC	TRUE
CTSV	non-TF	8.10459e-12	1.53833	0.189	0.017	1.22866e-07	SCLC	TRUE
WFDC2	non-TF	2.97704e-10	1.45224	0.946	0.638	4.51319e-06	SCLC
FRZB	non-TF	0.00410176	1.4456	0.324	0.171	1	SCLC
SLC34A2	non-TF	3.52163e-09	1.41577	0.27	0.048	5.33879e-05	SCLC	TRUE
EMP3	non-TF	0.000151573	1.36876	0.27	0.095	1	SCLC
PALLD	non-TF	1.06484e-06	1.33083	0.459	0.177	0.0161429	SCLC
SOX4	TF	5.34336e-06	1.28744	0.649	0.366	0.0810053	SCLC
S100A10	non-TF	4.2599e-11	1.27554	0.973	0.683	6.458e-07	SCLC	TRUE
TMSB10	non-TF	3.44247e-09	1.21149	0.703	0.312	5.21879e-05	SCLC	TRUE
CNMD	non-TF	2.9547e-11	1.18057	0.27	0.038	4.47933e-07	SCLC
SFRP4	non-TF	2.67093e-25	1.1572	0.189	0.004	4.04913e-21	SCLC
TMSB4X	non-TF	5.85969e-11	1.15352	0.946	0.619	8.88328e-07	SCLC
FBXO32	non-TF	0.0055245	1.1419	0.324	0.178	1	SCLC
FAM200B	non-TF	8.15316e-06	1.13789	0.622	0.341	0.123602	SCLC
TIMP3	non-TF	1.69596e-06	1.0998	0.243	0.055	0.0257107	SCLC
UBE2H	non-TF	2.80135e-06	1.08917	0.459	0.181	0.0424684	SCLC
KRT8	non-TF	3.26339e-06	1.07082	0.703	0.411	0.049473	SCLC
ANXA11	non-TF	0.000181517	1.01482	0.324	0.132	1	SCLC
TAGLN2	non-TF	4.02188e-05	1.01006	0.216	0.056	0.609717	SCLC
HES4	TF	5.94252e-06	1.0076	0.324	0.1	0.0900886	SCLC
IGFBP2	non-TF	4.73449e-18	0.997519	0.135	0.003	7.17749e-14	SCLC
LMNA	non-TF	1.10013e-06	0.969699	0.324	0.09	0.0166779	SCLC	TRUE
HSPB1	non-TF	0.00213816	0.967917	0.486	0.326	1	SCLC	TRUE
EPCAM	non-TF	3.25938e-07	0.963759	0.919	0.665	0.00494122	SCLC	TRUE
ARSD	non-TF	2.34845e-05	0.961552	0.216	0.054	0.356024	SCLC
ERF	TF	0.00263281	0.936432	0.27	0.12	1	SCLC
IL32	non-TF	2.86124e-29	0.936337	0.135	0	4.33763e-25	SCLC
GAN	non-TF	0.00141935	0.934008	0.216	0.078	1	SCLC
TPGS2	non-TF	2.19613e-06	0.894932	0.676	0.354	0.0332934	SCLC
REXO2	non-TF	0.00153448	0.882522	0.351	0.17	1	SCLC
S100A2	non-TF	0.00141945	0.880924	0.108	0.024	1	SCLC	TRUE
PBX1	TF	4.19256e-05	0.862721	0.541	0.265	0.635592	SCLC
RRAS	non-TF	9.31746e-13	0.859703	0.216	0.02	1.41253e-08	SCLC
CD151	non-TF	1.34262e-05	0.858429	0.297	0.09	0.203541	SCLC
WLS	non-TF	3.73457e-06	0.853215	0.378	0.124	0.0566161	SCLC
AKAP12	non-TF	4.97319e-05	0.850599	0.622	0.338	0.753935	SCLC

## Sheet: Table S3. SC vs HC
Table S3. Gene expression enriched in supporting cells (SC) or hair cells (HC) clusters from an untreated utricle (scUntr-2). Wilcoxon rank-sum test, with a Bonferroni Padj < .05. Related to Figure 3a.
Transcription factors (TF) were detected using AnimalTFDB 3.0, druggable genes using DGIdb 4.0.
Gene	TF	p_val	avg_log2FC	pct.1	pct.2	p_val_adj	Drug
OTOL1	non-TF	2.95347e-28	3.3576	0.784	0.184	4.47746e-24
SPARCL1	non-TF	5.26296e-39	3.09975	0.918	0.207	7.97865e-35
MIA	non-TF	2.03205e-38	3.01021	0.921	0.241	3.08058e-34	TRUE
AGR2	non-TF	1.368e-35	2.9434	0.88	0.23	2.07389e-31
CD9	non-TF	7.19797e-37	2.89353	0.894	0.172	1.09121e-32	TRUE
S100A6	non-TF	1.33607e-38	2.85924	0.934	0.299	2.02548e-34
PAQR6	non-TF	2.4877e-33	2.84591	0.829	0.161	3.77135e-29
OTOG	non-TF	4.70464e-36	2.82046	0.892	0.195	7.13223e-32
PTN	non-TF	4.94389e-34	2.7893	0.89	0.218	7.49494e-30
FXYD3	non-TF	3.21231e-33	2.72709	0.852	0.172	4.86986e-29
IGFBP7	non-TF	1.76905e-28	2.65848	0.786	0.184	2.68187e-24
ID1	TF	3.21882e-34	2.62738	0.9	0.207	4.87974e-30
SNORC	non-TF	1.15311e-26	2.59224	0.782	0.207	1.74811e-22
KRT18	non-TF	6.18244e-27	2.53939	0.775	0.161	9.37258e-23	TRUE
S100A11	non-TF	6.59913e-25	2.46636	0.739	0.161	1.00043e-20
S100B	non-TF	1.62884e-21	2.39591	0.661	0.115	2.46932e-17	TRUE
S100A10	non-TF	8.23232e-25	2.37214	0.739	0.138	1.24802e-20	TRUE
COL9A3	non-TF	5.61132e-22	2.36458	0.676	0.115	8.50676e-18
GFAP	non-TF	1.17785e-20	2.3642	0.687	0.149	1.78562e-16	TRUE
IFI27	non-TF	4.04455e-21	2.35638	0.681	0.149	6.13153e-17	TRUE
FAM107A	non-TF	1.54846e-30	2.35419	0.855	0.345	2.34746e-26
CD24	non-TF	1.38183e-22	2.33724	0.698	0.115	2.09485e-18
VIM	non-TF	5.10712e-24	2.32968	0.747	0.161	7.74239e-20	TRUE
TMSB4X	non-TF	2.93801e-21	2.30846	0.67	0.126	4.45402e-17
AGR3	non-TF	1.60228e-17	2.25957	0.587	0.103	2.42905e-13
CTHRC1	non-TF	7.39153e-22	2.23728	0.68	0.126	1.12056e-17
ZBTB20	TF	7.52881e-29	2.19346	0.851	0.322	1.14137e-24
ITM2B	non-TF	5.6853e-41	2.18424	0.963	0.713	8.61891e-37
ANXA2	non-TF	1.40123e-20	2.15791	0.66	0.138	2.12426e-16	TRUE
RBP1	non-TF	3.52019e-18	2.09788	0.603	0.103	5.3366e-14
CST3	non-TF	6.11945e-42	2.09745	0.989	0.908	9.27709e-38	TRUE
SORBS2	non-TF	7.3712e-21	2.07927	0.711	0.218	1.11747e-16
CLU	non-TF	4.51218e-16	2.06885	0.566	0.103	6.84047e-12	TRUE
TPD52L1	non-TF	1.40931e-17	2.04068	0.593	0.115	2.13652e-13
KRT19	non-TF	2.29469e-12	2.03642	0.497	0.126	3.47874e-08	TRUE
RFLNB	non-TF	3.16759e-16	1.98844	0.567	0.115	4.80207e-12
DBI	non-TF	1.82128e-19	1.98364	0.679	0.184	2.76107e-15	TRUE
PLPP2	non-TF	4.26927e-15	1.97594	0.528	0.092	6.47221e-11
ALDH1A1	non-TF	2.50879e-15	1.97499	0.54	0.092	3.80332e-11	TRUE
ID3	TF	6.78937e-14	1.96608	0.549	0.138	1.02927e-09
IER2	non-TF	5.28563e-19	1.95478	0.735	0.31	8.01302e-15
CEBPD	TF	1.01001e-11	1.95441	0.491	0.126	1.53118e-07
USH1C	non-TF	5.3298e-30	1.94249	0.884	0.483	8.07998e-26
MDK	non-TF	1.02611e-16	1.93655	0.611	0.138	1.55559e-12	TRUE
RPL10	non-TF	2.53272e-38	1.93332	0.973	0.782	3.8396e-34	TRUE
RPL29	non-TF	3.83631e-26	1.86669	0.845	0.448	5.81585e-22
F3	non-TF	6.04673e-13	1.78468	0.486	0.08	9.16685e-09	TRUE
JUN	TF	2.3158e-20	1.78174	0.836	0.437	3.51076e-16	TRUE
C4orf48	non-TF	6.82977e-17	1.77974	0.657	0.184	1.03539e-12
PRSS23	non-TF	2.36103e-15	1.77513	0.622	0.195	3.57933e-11
SYNE2	non-TF	7.45008e-14	1.77267	0.553	0.138	1.12943e-09
ENHO	non-TF	3.72304e-14	1.73746	0.54	0.103	5.64413e-10
TTYH1	non-TF	2.50953e-12	1.72923	0.498	0.126	3.80445e-08
AC009041.2	non-TF	9.61838e-13	1.71772	0.523	0.126	1.45815e-08
LINC01549	non-TF	5.24002e-11	1.71321	0.457	0.115	7.94387e-07
HERPUD1	non-TF	6.11991e-16	1.70331	0.684	0.264	9.27778e-12
CBR1	non-TF	5.87953e-14	1.69795	0.584	0.184	8.91336e-10	TRUE
SOX2	TF	1.58989e-14	1.68888	0.632	0.195	2.41027e-10
LINC01198	non-TF	2.21125e-12	1.68414	0.471	0.08	3.35226e-08
TWF1	non-TF	7.19556e-15	1.6818	0.656	0.276	1.09085e-10
CMTM5	non-TF	1.9578e-11	1.66837	0.48	0.126	2.96803e-07
EPHX1	non-TF	1.58281e-13	1.65305	0.569	0.161	2.39955e-09	TRUE
GJB6	non-TF	3.19238e-11	1.64849	0.467	0.103	4.83964e-07	TRUE
MXI1	TF	2.45547e-11	1.64835	0.459	0.092	3.7225e-07	TRUE
AIF1L	non-TF	1.98035e-12	1.63406	0.536	0.138	3.00221e-08
TUBB2B	non-TF	1.59014e-10	1.62944	0.433	0.092	2.41066e-06	TRUE
B2M	non-TF	2.10733e-25	1.62615	0.919	0.586	3.19471e-21	TRUE
SH3BGRL	non-TF	1.35381e-11	1.61777	0.431	0.057	2.05237e-07
TMOD1	non-TF	5.10437e-12	1.61741	0.49	0.103	7.73822e-08
BRICD5	non-TF	1.22335e-18	1.61571	0.785	0.379	1.8546e-14
GSN	non-TF	1.56581e-16	1.59598	0.769	0.46	2.37376e-12
NDRG2	non-TF	6.45403e-14	1.59232	0.606	0.172	9.78431e-10
SPHK1	non-TF	3.52498e-11	1.58863	0.474	0.103	5.34387e-07	TRUE
ATP6V0E1	non-TF	1.56464e-20	1.58706	0.814	0.494	2.37199e-16
TUBA1B	non-TF	7.84478e-12	1.58563	0.549	0.184	1.18927e-07	TRUE
CD63	non-TF	5.83848e-25	1.58495	0.881	0.621	8.85113e-21	TRUE
TSPAN3	non-TF	6.95596e-21	1.58358	0.829	0.471	1.05452e-16
GLUL	non-TF	5.44442e-11	1.57918	0.472	0.115	8.25374e-07
BTG3	non-TF	2.37869e-10	1.57131	0.41	0.069	3.60609e-06
CCDC80	non-TF	8.68457e-10	1.5662	0.412	0.092	1.31658e-05
COX7A1	non-TF	3.15494e-09	1.55316	0.38	0.069	4.78288e-05
NPC2	non-TF	7.9927e-11	1.5524	0.459	0.103	1.21169e-06
ALDH2	non-TF	3.74274e-11	1.54981	0.512	0.172	5.674e-07	TRUE
CMYA5	non-TF	4.31988e-11	1.54064	0.56	0.218	6.54894e-07
PPP2R2B	non-TF	2.63681e-13	1.54056	0.616	0.253	3.9974e-09
SPTSSA	non-TF	2.57707e-11	1.53947	0.517	0.149	3.90684e-07
PTMA	non-TF	4.10203e-35	1.53388	0.979	0.885	6.21868e-31	TRUE
TMEM14A	non-TF	3.70283e-11	1.5242	0.493	0.138	5.61349e-07
FAM69C	non-TF	9.46964e-11	1.52269	0.453	0.103	1.4356e-06
TSPAN8	non-TF	1.56078e-11	1.50953	0.498	0.103	2.36615e-07
COL11A2	non-TF	3.77456e-11	1.5017	0.486	0.115	5.72224e-07	TRUE
ARL4C	non-TF	3.85324e-10	1.49903	0.395	0.057	5.84152e-06
SAT1	non-TF	8.04694e-11	1.49819	0.524	0.161	1.21992e-06
CALD1	non-TF	1.77929e-10	1.49116	0.403	0.057	2.6974e-06
ZFP36L1	TF	1.51239e-09	1.49087	0.391	0.069	2.29279e-05
CHL1	non-TF	1.28364e-09	1.48434	0.382	0.057	1.946e-05
SPATS2L	non-TF	1.52755e-12	1.48303	0.587	0.207	2.31576e-08
FBXO2	non-TF	1.76373e-40	1.48064	0.994	1	2.67382e-36
FXYD6	non-TF	4.10144e-13	1.47524	0.63	0.276	6.21779e-09
IGFBP3	non-TF	8.63899e-09	1.47386	0.394	0.08	0.000130967	TRUE
PLP1	non-TF	2.83841e-09	1.47347	0.383	0.069	4.30303e-05
AKAP12	non-TF	5.86766e-09	1.45828	0.365	0.069	8.89538e-05
ROCR	non-TF	2.49101e-08	1.4537	0.336	0.046	0.000377637
JUNB	TF	2.03553e-10	1.44606	0.56	0.184	3.08586e-06	TRUE
EEF1D	non-TF	1.73884e-16	1.44486	0.769	0.437	2.63608e-12
OTOGL	non-TF	6.88161e-09	1.43593	0.418	0.103	0.000104325
FOSB	TF	5.59716e-10	1.43494	0.527	0.195	8.4853e-06
KRT8	non-TF	7.09056e-10	1.42354	0.442	0.103	1.07493e-05
CNN3	non-TF	3.64889e-10	1.40804	0.558	0.23	5.53172e-06
CSRP2	non-TF	7.17812e-13	1.40119	0.662	0.241	1.0882e-08
CADM1	non-TF	1.17715e-09	1.39475	0.414	0.08	1.78456e-05
PEBP4	non-TF	1.17329e-08	1.39339	0.376	0.08	0.00017787	TRUE
KREMEN1	non-TF	2.53695e-08	1.39092	0.431	0.149	0.000384602
ACTB	non-TF	1.49144e-14	1.38079	0.737	0.414	2.26103e-10	TRUE
SCRG1	non-TF	4.83494e-08	1.37155	0.399	0.115	0.000732977
RNASET2	non-TF	2.47923e-09	1.36794	0.415	0.092	3.75852e-05
PKM	non-TF	2.24501e-11	1.36282	0.623	0.322	3.40344e-07	TRUE
SOX4	TF	9.72802e-09	1.35979	0.395	0.08	0.000147477
CKB	non-TF	8.91454e-12	1.35767	0.625	0.253	1.35144e-07
SORL1	non-TF	5.43301e-10	1.35536	0.516	0.172	8.23645e-06
CLIC1	non-TF	6.02384e-10	1.3502	0.467	0.138	9.13214e-06
ZFP36L2	TF	3.00356e-08	1.34208	0.353	0.069	0.00045534	TRUE
INHBA	non-TF	4.33089e-08	1.32201	0.337	0.057	0.000656563	TRUE
MPZL2	non-TF	4.41551e-08	1.3156	0.388	0.103	0.000669391
MSI2	non-TF	2.67546e-08	1.31415	0.469	0.172	0.0004056
ITM2C	non-TF	1.35413e-08	1.31255	0.423	0.126	0.000205286
HHATL	non-TF	8.53395e-07	1.31141	0.382	0.138	0.0129375
COL2A1	non-TF	2.42283e-07	1.31108	0.372	0.115	0.00367301	TRUE
RND2	non-TF	6.34602e-09	1.31006	0.492	0.184	9.62057e-05
SPARC	non-TF	3.07072e-09	1.30789	0.55	0.253	4.65521e-05	TRUE
SVIP	non-TF	2.23405e-12	1.30373	0.702	0.402	3.38682e-08
WASF2	non-TF	7.13101e-09	1.29638	0.47	0.161	0.000108106
RHOC	non-TF	2.03005e-09	1.29217	0.479	0.149	3.07755e-05
SLITRK6	non-TF	1.00812e-07	1.28985	0.286	0.023	0.0015283	TRUE
DSTYK	non-TF	1.33542e-07	1.288	0.393	0.115	0.00202449
ID2	TF	5.26233e-08	1.2682	0.324	0.046	0.00079777
BOC	non-TF	4.39509e-07	1.26651	0.346	0.092	0.00666295
CLDN3	non-TF	7.6171e-08	1.26271	0.402	0.103	0.00115475
RASGRP1	non-TF	1.55676e-07	1.25544	0.323	0.057	0.00236005	TRUE
SLC3A2	non-TF	2.91812e-10	1.25091	0.622	0.356	4.42387e-06	TRUE
TRIM2	non-TF	7.56354e-08	1.25037	0.359	0.08	0.00114663
TMSB10	non-TF	1.23634e-07	1.24934	0.337	0.069	0.00187429	TRUE
KIF5C	non-TF	8.36586e-07	1.24618	0.353	0.103	0.0126826
RCN2	non-TF	5.55105e-08	1.24167	0.467	0.184	0.000841539
SELENBP1	non-TF	5.63486e-07	1.23557	0.338	0.092	0.00854244
SLC1A3	non-TF	4.86964e-07	1.23468	0.405	0.149	0.00738238	TRUE
SPCS2	non-TF	8.05272e-15	1.22987	0.783	0.517	1.22079e-10
MTUS1	non-TF	4.86278e-07	1.21695	0.407	0.149	0.00737197
EGR1	TF	9.9611e-06	1.20687	0.452	0.218	0.15101	TRUE
PDIA4	non-TF	4.02943e-07	1.20322	0.345	0.092	0.00610862
GAS1	non-TF	8.62564e-07	1.19469	0.301	0.057	0.0130765
FAM213A	non-TF	1.11831e-10	1.19281	0.682	0.494	1.69535e-06
PNKD	non-TF	4.65936e-11	1.18987	0.587	0.23	7.06359e-07
LITAF	TF	2.68817e-07	1.17796	0.397	0.126	0.00407527
STMN1	non-TF	3.96485e-09	1.17102	0.624	0.333	6.01072e-05	TRUE
LYPD1	non-TF	4.26217e-07	1.16962	0.365	0.103	0.00646145
RAC1	non-TF	2.86251e-08	1.16035	0.518	0.23	0.000433957	TRUE
DIRAS3	non-TF	8.05757e-07	1.15953	0.317	0.069	0.0122153
NFIB	TF	2.86961e-06	1.15561	0.415	0.172	0.0435033	TRUE
IRX3	TF	3.49968e-07	1.1464	0.287	0.034	0.00530551
FERMT2	non-TF	6.78619e-07	1.14188	0.288	0.046	0.0102879
FXYD1	non-TF	1.14857e-05	1.1413	0.301	0.092	0.174123
C12orf57	non-TF	6.54579e-07	1.14052	0.469	0.218	0.00992342
SRP9	non-TF	3.87745e-13	1.13949	0.783	0.632	5.87821e-09
SOX9	TF	1.05097e-06	1.13921	0.299	0.057	0.0159327
ADI1	non-TF	4.15329e-07	1.13802	0.451	0.184	0.00629639
NFKBIA	non-TF	6.76426e-09	1.13799	0.547	0.218	0.000102546	TRUE
FGFRL1	non-TF	2.30518e-07	1.13782	0.306	0.046	0.00349466	TRUE
TSPAN6	non-TF	6.951e-06	1.12858	0.256	0.046	0.105377
ELF3	TF	1.74713e-06	1.12836	0.3	0.057	0.0264865
BMP7	non-TF	8.97113e-07	1.1241	0.293	0.057	0.0136002	TRUE
TMBIM6	non-TF	7.50363e-13	1.12097	0.752	0.575	1.13755e-08
GADD45B	non-TF	2.35562e-05	1.11697	0.266	0.069	0.357111
HSD17B12	non-TF	8.5535e-06	1.11553	0.41	0.184	0.129671
DLX5	TF	2.8779e-05	1.1136	0.263	0.069	0.43629
DNAJC3	non-TF	3.76999e-07	1.11096	0.501	0.241	0.0057153
LRMDA	non-TF	3.32377e-06	1.10963	0.308	0.08	0.0503884	TRUE
NEBL	non-TF	9.82702e-06	1.09794	0.364	0.138	0.148978
CBX5	non-TF	3.92601e-07	1.08992	0.518	0.264	0.00595183
MGP	non-TF	3.0545e-05	1.08926	0.256	0.057	0.463063
ROMO1	non-TF	4.70838e-07	1.08278	0.556	0.333	0.00713791
VEGFB	non-TF	2.00934e-06	1.08208	0.412	0.161	0.0304617	TRUE
HLA-B	non-TF	3.34655e-11	1.07583	0.777	0.506	5.07337e-07	TRUE
GAS2	non-TF	1.07177e-05	1.07454	0.295	0.08	0.162481
HSPA5	non-TF	1.40703e-09	1.07299	0.8	0.713	2.13305e-05	TRUE
RHOU	non-TF	1.8925e-06	1.0722	0.276	0.046	0.0286902
NFIX	TF	6.14815e-06	1.07074	0.396	0.161	0.093206
PTMS	non-TF	5.30639e-07	1.07029	0.541	0.299	0.00804449
GNAS	non-TF	2.42357e-12	1.07024	0.786	0.425	3.67413e-08	TRUE
MXRA7	non-TF	2.38507e-06	1.06591	0.299	0.069	0.0361577
CFL1	non-TF	7.96011e-07	1.06427	0.452	0.184	0.0120675	TRUE
GSTK1	non-TF	5.52248e-06	1.05898	0.332	0.103	0.0837208
RPS23	non-TF	2.40127e-20	1.05603	0.937	0.874	3.64032e-16
ID4	TF	3.92997e-09	1.05453	0.662	0.356	5.95783e-05
KANK1	non-TF	1.83534e-05	1.05251	0.265	0.069	0.278238
HES1	TF	3.40272e-05	1.05242	0.246	0.057	0.515852	TRUE
TSPAN18	non-TF	3.7844e-06	1.05138	0.281	0.057	0.0573715
FGFR1	non-TF	2.95339e-05	1.0502	0.265	0.069	0.447734	TRUE
IVD	non-TF	1.17063e-05	1.04422	0.434	0.218	0.177467
CD99	non-TF	1.22995e-06	1.04268	0.266	0.034	0.018646
NR4A1	TF	1.35147e-05	1.04089	0.291	0.08	0.204882	TRUE
CD164	non-TF	9.77506e-06	1.04082	0.28	0.069	0.14819
TMEM79	non-TF	4.75666e-06	1.04036	0.304	0.069	0.072111
ERBB3	non-TF	3.60668e-05	1.03994	0.233	0.046	0.546773	TRUE
ITPR2	non-TF	1.93625e-05	1.03988	0.242	0.046	0.293536	TRUE
FCGRT	non-TF	1.56498e-05	1.03833	0.299	0.092	0.237251	TRUE
H3F3A	non-TF	3.88275e-15	1.03703	0.871	0.793	5.88625e-11
FAM174B	non-TF	9.46101e-06	1.03633	0.284	0.069	0.143429
ACTG1	non-TF	6.583e-13	1.03603	0.827	0.655	9.97983e-09	TRUE
PPIB	non-TF	2.52137e-06	1.03256	0.537	0.322	0.038224	TRUE
CANX	non-TF	3.09856e-06	1.02585	0.516	0.287	0.0469741	TRUE
SOX10	TF	5.96627e-06	1.01945	0.272	0.057	0.0904487	TRUE
CXADR	non-TF	1.0735e-05	1.01605	0.48	0.264	0.162743
NEDD4L	non-TF	2.5734e-05	1.01088	0.372	0.161	0.390127	TRUE
RASSF4	non-TF	2.40248e-05	1.00644	0.278	0.08	0.364216
TSPO	non-TF	7.32757e-06	0.997402	0.464	0.241	0.111086	TRUE
XPA	TF	2.20118e-06	0.993763	0.408	0.149	0.0333699	TRUE
CRYAB	non-TF	3.7631e-05	0.990584	0.282	0.08	0.570485
KCNJ16	non-TF	1.00696e-05	0.99046	0.254	0.046	0.152655
ECHS1	non-TF	3.53441e-08	0.989297	0.586	0.287	0.000535816
TMED8	non-TF	0.000109084	0.986191	0.262	0.08	1
AMER2	non-TF	8.57458e-06	0.983813	0.237	0.034	0.129991
HEY1	TF	0.000124838	0.982107	0.268	0.092	1
KCNQ1OT1	non-TF	0.000219207	0.978135	0.285	0.103	1
RRBP1	non-TF	1.47554e-05	0.976652	0.479	0.264	0.223691
SELENOM	non-TF	1.08372e-11	0.974625	0.813	0.609	1.64292e-07
RCN1	non-TF	8.60025e-06	0.973132	0.225	0.023	0.13038
TSC22D1	TF	9.33096e-06	0.969289	0.527	0.299	0.141457
MESD	non-TF	5.50064e-06	0.967475	0.497	0.253	0.0833896
SHC4	non-TF	7.22798e-05	0.967294	0.266	0.08	1
VEPH1	non-TF	2.9939e-05	0.965837	0.39	0.172	0.453875
TMEM205	non-TF	2.3463e-07	0.965343	0.642	0.471	0.003557
C1orf54	non-TF	3.9814e-06	0.964413	0.28	0.057	0.060358
NEAT1	non-TF	7.33479e-05	0.962313	0.304	0.103	1
HIGD1A	non-TF	1.5038e-05	0.960914	0.357	0.138	0.227977
DKK3	non-TF	5.6062e-06	0.958552	0.262	0.046	0.08499	TRUE
CPXM2	non-TF	3.63765e-05	0.956003	0.247	0.057	0.551468
CAP1	non-TF	7.60525e-06	0.955087	0.369	0.138	0.115296
DMKN	non-TF	3.17895e-05	0.954839	0.28	0.08	0.481928
STMP1	non-TF	1.61217e-05	0.954835	0.336	0.115	0.244405
SMOC1	non-TF	9.63426e-06	0.950668	0.286	0.069	0.146055
PRR15	non-TF	1.43042e-05	0.946948	0.47	0.241	0.216851
FOS	TF	9.05099e-08	0.945768	0.684	0.391	0.00137213	TRUE
FAM181B	non-TF	2.33907e-05	0.941279	0.223	0.034	0.354603
LIMA1	non-TF	4.27532e-05	0.94029	0.445	0.23	0.648138
TCEAL9	non-TF	1.70837e-05	0.938149	0.425	0.195	0.258988
DTNB	non-TF	0.000768402	0.931262	0.2	0.057	1
HINT1	non-TF	6.76974e-11	0.929772	0.764	0.575	1.02629e-06	TRUE
NME4	non-TF	0.000131205	0.927475	0.323	0.138	1
BSPRY	non-TF	6.2738e-05	0.925825	0.357	0.149	0.951108
METTL9	non-TF	3.43722e-05	0.925479	0.299	0.092	0.521082
UPF3A	non-TF	5.51065e-05	0.925392	0.349	0.149	0.835415
TLE4	non-TF	4.8393e-05	0.923538	0.227	0.046	0.733638
NR3C1	TF	3.29999e-05	0.922644	0.253	0.057	0.500279	TRUE
IGFBP5	non-TF	3.30122e-05	0.92041	0.228	0.034	0.500465	TRUE
SUB1	TF	8.47901e-07	0.919698	0.624	0.425	0.0128542
SMS	non-TF	3.74134e-05	0.918621	0.42	0.207	0.567188	TRUE
DDAH2	non-TF	8.81026e-07	0.916394	0.304	0.057	0.0133564
FARP1	non-TF	4.12142e-05	0.91013	0.217	0.034	0.624807
DHRS7	non-TF	4.27157e-08	0.908775	0.72	0.552	0.00064757
ENO1	non-TF	5.24094e-05	0.90792	0.428	0.23	0.794527
IFITM3	non-TF	4.37492e-05	0.907857	0.215	0.034	0.663237
HEPN1	non-TF	0.000169909	0.907683	0.253	0.08	1
ABRACL	non-TF	2.41133e-05	0.906604	0.208	0.023	0.365557
TRPM3	non-TF	0.000233497	0.906374	0.223	0.057	1	TRUE
DUSP6	non-TF	1.78481e-05	0.904994	0.197	0.011	0.270578	TRUE
CRYL1	non-TF	0.000119921	0.903095	0.338	0.149	1
CTNNA1	non-TF	0.000152286	0.902492	0.451	0.264	1
LGR6	non-TF	8.89261e-05	0.897154	0.238	0.057	1	TRUE
HABP4	non-TF	0.000102375	0.895977	0.371	0.172	1
SLC22A17	non-TF	3.46546e-05	0.894576	0.368	0.149	0.525363
PDCD6	non-TF	1.2461e-05	0.894445	0.467	0.241	0.188908
PMEPA1	non-TF	1.06477e-05	0.892338	0.273	0.057	0.161419
FAM3C	non-TF	0.000419969	0.891184	0.308	0.138	1
NUPR1	non-TF	0.000308178	0.890718	0.199	0.046	1
POLR2F	non-TF	1.86674e-06	0.884609	0.609	0.414	0.0282998
SOBP	non-TF	5.31355e-05	0.878358	0.228	0.046	0.805534
TRIM16L	non-TF	5.82559e-05	0.877959	0.262	0.069	0.88316
ADH5	non-TF	0.000516191	0.87425	0.273	0.115	1
LDHB	non-TF	6.88289e-09	0.872605	0.783	0.552	0.000104345
IFI27L2	non-TF	1.96483e-06	0.8726	0.578	0.345	0.0297868
SEC14L1	non-TF	0.00210996	0.872443	0.332	0.195	1
SMG5	non-TF	4.29078e-05	0.870435	0.216	0.034	0.650483
DPYSL2	non-TF	1.10565e-05	0.869325	0.512	0.276	0.167617	TRUE
TRDN	non-TF	5.42896e-05	0.867499	0.214	0.034	0.82303
MYL12A	non-TF	0.000115759	0.866821	0.344	0.149	1
NUCKS1	non-TF	3.24669e-07	0.863053	0.669	0.437	0.00492198
MPZL1	non-TF	0.000129667	0.860806	0.231	0.057	1
BDH2	non-TF	1.72506e-05	0.859924	0.23	0.034	0.261519
EPN2	non-TF	3.31164e-05	0.859383	0.365	0.149	0.502045
PHYHD1	non-TF	2.1085e-05	0.858711	0.26	0.057	0.319649
CHMP4C	non-TF	0.000372175	0.858676	0.312	0.138	1
CHST6	non-TF	0.000151432	0.856156	0.214	0.046	1
SEC61B	non-TF	2.93464e-07	0.854824	0.719	0.609	0.00444891
HTATIP2	non-TF	9.75374e-05	0.854561	0.293	0.103	1
C9orf3	non-TF	0.000100136	0.854526	0.294	0.103	1
VDAC1	non-TF	0.00025081	0.852155	0.437	0.253	1	TRUE
CRNDE	non-TF	9.18139e-05	0.850867	0.376	0.172	1
TMCO1	non-TF	0.000824547	0.848993	0.44	0.287	1
CPNE3	non-TF	6.23505e-05	0.848426	0.214	0.034	0.945233
IRAK4	non-TF	0.000994819	0.847495	0.253	0.103	1	TRUE
GYPC	non-TF	0.000292808	0.846919	0.253	0.08	1
SLCO1A2	non-TF	0.000158077	0.84391	0.196	0.034	1	TRUE
CD109	non-TF	5.86636e-05	0.838579	0.16	0	0.889341
HLA-A	non-TF	6.86261e-07	0.837951	0.65	0.448	0.0104037	TRUE
ISL1	TF	0.00105912	0.837167	0.198	0.057	1
SSX2IP	non-TF	0.00104149	0.832248	0.267	0.115	1
TSHZ2	TF	0.000675779	0.831089	0.217	0.069	1	TRUE
ALAD	non-TF	8.78738e-05	0.830771	0.204	0.034	1	TRUE
AQP4	non-TF	4.95226e-05	0.828814	0.181	0.011	0.750762	TRUE
ANXA6	non-TF	2.32491e-05	0.828535	0.228	0.034	0.352456
SSR3	non-TF	0.00151078	0.827972	0.364	0.218	1
CNDP2	non-TF	0.000151799	0.826433	0.214	0.046	1
LEMD1	non-TF	5.90789e-05	0.824004	0.196	0.023	0.895636
GNAI2	non-TF	0.000252767	0.822476	0.265	0.092	1
RHOB	non-TF	0.000676874	0.822104	0.249	0.092	1	TRUE
HADHA	non-TF	0.000773358	0.821219	0.321	0.161	1
RPL27A	non-TF	2.96025e-05	0.820276	0.607	0.471	0.448775
ENAH	non-TF	0.000218511	0.820231	0.499	0.31	1
SNHG19	non-TF	0.000243474	0.818029	0.396	0.207	1
HIST1H1E	non-TF	0.000463769	0.817317	0.193	0.046	1
PPP1R14B	non-TF	7.04176e-05	0.816816	0.224	0.046	1
CLNS1A	non-TF	0.000478577	0.816093	0.294	0.126	1
CYSTM1	non-TF	0.000218598	0.814264	0.429	0.253	1
CDC42EP4	non-TF	0.0001114	0.813769	0.2	0.034	1
SDC4	non-TF	0.000549716	0.812458	0.435	0.253	1
PRDX1	non-TF	7.90788e-17	0.812349	0.966	0.954	1.19883e-12	TRUE
DDR1	non-TF	5.60211e-05	0.81187	0.313	0.103	0.849279	TRUE
HIGD2A	non-TF	8.17176e-05	0.811863	0.471	0.276	1
KIF1A	non-TF	0.000618318	0.811257	0.336	0.172	1
COL18A1	non-TF	0.000197969	0.80897	0.206	0.046	1	TRUE
SORBS3	non-TF	3.03199e-05	0.806662	0.171	0	0.459649
RAB13	non-TF	0.00114747	0.806571	0.335	0.172	1
DYNC1LI2	non-TF	0.00105818	0.805071	0.367	0.207	1
SEPT7	non-TF	4.43003e-06	0.799906	0.662	0.471	0.0671592
HSP90B1	non-TF	2.11791e-06	0.798545	0.778	0.667	0.0321075	TRUE
LRRC4C	non-TF	0.000416197	0.797084	0.195	0.046	1
ADGRG1	non-TF	0.000265222	0.795942	0.206	0.046	1
PLPP3	non-TF	0.000101474	0.795345	0.219	0.046	1
SRSF9	non-TF	0.000234157	0.790473	0.493	0.322	1
TMEM14B	non-TF	4.4072e-05	0.790283	0.499	0.287	0.668131
EPB41L2	non-TF	0.000382409	0.789096	0.181	0.034	1
ARG2	non-TF	0.000277334	0.78843	0.222	0.057	1	TRUE
TBX2	TF	0.00209218	0.787643	0.397	0.253	1	TRUE
SEMA6A	non-TF	0.000366233	0.785455	0.18	0.034	1
TM4SF18	non-TF	9.69243e-05	0.782339	0.186	0.023	1
SELENOS	non-TF	0.000225645	0.780884	0.483	0.31	1
CYBA	non-TF	0.000211659	0.777837	0.191	0.034	1	TRUE
SPP1	non-TF	0.00310702	0.776758	0.177	0.057	1	TRUE
EPCAM	non-TF	6.46887e-05	0.77657	0.673	0.586	0.98068	TRUE
DMTN	non-TF	0.000575599	0.774367	0.281	0.115	1
ITGB1	non-TF	0.000173327	0.773812	0.25	0.069	1	TRUE
MUC15	non-TF	8.26726e-05	0.773253	0.206	0.034	1
SLC44A3	non-TF	0.000205423	0.772891	0.191	0.034	1
OTOA	non-TF	8.91957e-05	0.77088	0.279	0.092	1
TMEM106C	non-TF	0.000566716	0.768585	0.422	0.253	1
BAMBI	non-TF	0.000287025	0.768522	0.203	0.046	1
RPL35A	non-TF	9.15535e-13	0.764888	0.887	0.897	1.38795e-08
TPGS2	non-TF	0.00104788	0.764702	0.369	0.207	1
PRPSAP1	non-TF	0.000244605	0.764699	0.412	0.218	1
DUSP1	non-TF	0.00235415	0.762868	0.18	0.057	1	TRUE
TMEM59	non-TF	2.67898e-09	0.760569	0.83	0.793	4.06134e-05
IQGAP1	non-TF	3.40104e-05	0.760401	0.24	0.046	0.515598
ADIRF	non-TF	0.000460105	0.760002	0.177	0.034	1
PARVA	non-TF	5.27636e-05	0.751477	0.297	0.092	0.799896
SERPINF1	non-TF	0.000888704	0.751316	0.18	0.046	1	TRUE
RPS21	non-TF	6.64331e-05	0.751208	0.633	0.483	1
RPL7	non-TF	3.98172e-14	0.750297	0.945	0.908	6.03629e-10
SH3BGRL3	non-TF	0.000723873	0.749012	0.432	0.264	1
LRPAP1	non-TF	1.45836e-05	0.747168	0.671	0.552	0.221087
AL031731.1	non-TF	0.00401212	0.74474	0.42	0.287	1
OBSL1	non-TF	0.00169019	0.744458	0.217	0.08	1
NMT1	non-TF	0.000896455	0.742714	0.361	0.184	1
MT1X	non-TF	0.00354007	0.741191	0.343	0.207	1
S100A16	non-TF	6.36141e-05	0.741036	0.193	0.023	0.96439
ARL6IP5	non-TF	4.56653e-07	0.739379	0.771	0.667	0.00692285
SNRPG	non-TF	0.00028613	0.737076	0.572	0.471	1
DSTN	non-TF	2.54636e-05	0.735444	0.702	0.644	0.386027
TMEM14C	non-TF	0.000247117	0.735037	0.546	0.379	1
CHP1	non-TF	0.00194712	0.734788	0.401	0.253	1
NIPSNAP2	non-TF	0.00206424	0.734498	0.324	0.172	1
PALLD	non-TF	0.000534985	0.732704	0.191	0.046	1
HMGB3	TF	9.57007e-05	0.732576	0.187	0.023	1
GNG5	non-TF	0.0002348	0.732409	0.374	0.184	1
AL121820.2	non-TF	0.000320836	0.732389	0.183	0.034	1
STK38L	non-TF	0.00177197	0.731061	0.231	0.092	1	TRUE
AC009414.2	non-TF	3.9603e-05	0.726485	0.184	0.011	0.600381
PCP4L1	non-TF	0.000216381	0.72517	0.21	0.046	1
LGALS3	non-TF	0.00631327	0.723069	0.166	0.057	1	TRUE
HMGB1	TF	5.35839e-08	0.72155	0.816	0.782	0.000812332	TRUE
TLN1	non-TF	0.000674062	0.721198	0.225	0.069	1
RHOA	non-TF	0.000991341	0.720135	0.408	0.241	1	TRUE
SCP2	non-TF	0.000419534	0.719436	0.408	0.23	1
SPOCK1	non-TF	0.00136136	0.718663	0.496	0.345	1
PFN1	non-TF	0.000874796	0.718174	0.318	0.149	1
CAPG	non-TF	0.000392278	0.71776	0.371	0.184	1	TRUE
EEF2	non-TF	0.00432271	0.71657	0.448	0.333	1	TRUE
MARCKSL1	non-TF	0.000200593	0.716456	0.34	0.138	1	TRUE
SLC38A2	non-TF	0.00598296	0.71633	0.212	0.092	1	TRUE
PDIA6	non-TF	0.000156124	0.716019	0.59	0.414	1
SOCS7	non-TF	0.00144851	0.714454	0.174	0.046	1
TCEAL6	non-TF	0.000199939	0.714122	0.208	0.046	1
SORCS1	non-TF	0.00102689	0.713602	0.181	0.046	1
NPM1	non-TF	0.000798994	0.713467	0.537	0.402	1	TRUE
BAG3	non-TF	0.000370058	0.713154	0.166	0.023	1
S100A4	non-TF	0.00180389	0.712292	0.2	0.069	1	TRUE
ZFYVE21	non-TF	0.0011334	0.711068	0.286	0.126	1
PDLIM4	non-TF	0.000242748	0.710944	0.155	0.011	1
MIR99AHG	non-TF	0.000821059	0.709473	0.17	0.034	1
FHL1	non-TF	0.000220249	0.709401	0.172	0.023	1
SERTAD4-AS1	non-TF	0.000574694	0.709016	0.295	0.126	1
RNF43	non-TF	0.000287372	0.708307	0.152	0.011	1	TRUE
TMED10	non-TF	2.48475e-05	0.707585	0.683	0.598	0.376688
CENPX	TF	0.000691002	0.707214	0.206	0.057	1
PRCP	non-TF	0.000985551	0.706841	0.181	0.046	1	TRUE
BUB3	non-TF	0.00403398	0.706606	0.234	0.103	1
COX7A2L	non-TF	0.000674006	0.705903	0.285	0.115	1
MCFD2	non-TF	0.0028114	0.70524	0.332	0.184	1
GPRC5B	non-TF	0.000506706	0.70339	0.196	0.046	1
PIGR	non-TF	0.00863826	0.702703	0.146	0.046	1
PSAP	non-TF	0.000793233	0.701848	0.606	0.506	1
PTTG1IP	non-TF	0.00583741	0.701642	0.304	0.172	1
BCL2L1	non-TF	0.00374602	0.701153	0.157	0.046	1	TRUE
SERPINE2	non-TF	0.00208758	0.699796	0.214	0.08	1
ECI2	non-TF	0.000910909	0.698193	0.203	0.057	1
PCMTD1	non-TF	0.00221979	0.696461	0.261	0.115	1
CAPS	non-TF	0.000776126	0.69559	0.171	0.034	1
DUSP22	non-TF	0.00101955	0.695359	0.147	0.023	1
TSC22D4	TF	0.00325595	0.69407	0.223	0.092	1
B4GALNT1	non-TF	0.00016051	0.69375	0.144	0	1	TRUE
SFT2D1	non-TF	0.000211193	0.690981	0.176	0.023	1
SLC7A8	non-TF	0.000261853	0.690861	0.209	0.046	1
CAMTA1	TF	0.000220674	0.690857	0.597	0.494	1
NPR3	non-TF	0.000313168	0.690287	0.185	0.034	1	TRUE
RBP7	non-TF	0.000241779	0.689258	0.172	0.023	1
GALNT6	non-TF	0.00102697	0.689163	0.167	0.034	1
RPS3	non-TF	3.662e-09	0.688163	0.883	0.885	5.55159e-05
RTN4	non-TF	0.000842687	0.68705	0.572	0.437	1	TRUE
PNRC1	non-TF	0.00783724	0.684659	0.474	0.368	1
PDIA3	non-TF	0.000236537	0.683562	0.693	0.598	1
XBP1	TF	0.00216445	0.683548	0.281	0.138	1	TRUE
CDKN1C	non-TF	0.00105458	0.683458	0.165	0.034	1	TRUE
ANAPC15	non-TF	0.00191358	0.6821	0.234	0.092	1
AC004130.1	non-TF	0.00108638	0.681685	0.164	0.034	1
ATP1B2	non-TF	0.00185785	0.680579	0.218	0.08	1	TRUE
CYB5R2	non-TF	0.00267367	0.680523	0.212	0.08	1	TRUE
SERINC5	non-TF	0.00181165	0.679511	0.168	0.046	1
EEF1A1	non-TF	6.18195e-10	0.678938	0.937	0.885	9.37184e-06	TRUE
FGF20	non-TF	0.000196645	0.678421	0.158	0.011	1
MYDGF	non-TF	0.00351171	0.675408	0.206	0.08	1
TMEM256	non-TF	0.00186078	0.675005	0.365	0.207	1
SMIM4	non-TF	0.000340387	0.674945	0.235	0.069	1
NOTCH1	non-TF	0.000375228	0.674648	0.147	0.011	1	TRUE
ZFAS1	non-TF	0.00348859	0.674493	0.305	0.161	1
TUBB	non-TF	0.00107378	0.673865	0.34	0.172	1	TRUE
GCHFR	non-TF	0.00206458	0.672585	0.199	0.069	1
APOBEC3C	non-TF	0.00294168	0.672526	0.197	0.069	1
FAM102A	non-TF	0.00096789	0.671331	0.229	0.08	1
HIP1	non-TF	0.00225665	0.670475	0.134	0.023	1
GMPR	non-TF	0.00333531	0.669796	0.219	0.092	1
ATP6V0E2	non-TF	0.00861755	0.668005	0.312	0.184	1
ISG15	non-TF	0.00155545	0.666825	0.157	0.034	1	TRUE
LDHA	non-TF	0.00162374	0.665608	0.292	0.138	1	TRUE
CTSZ	non-TF	0.000728599	0.665234	0.189	0.046	1	TRUE
RPLP0	non-TF	0.000122811	0.66334	0.681	0.552	1
PLEKHJ1	non-TF	0.00708574	0.662958	0.265	0.138	1	TRUE
CYB5R3	non-TF	0.00528796	0.662564	0.293	0.161	1	TRUE
B4GALT4	non-TF	0.000707525	0.662402	0.17	0.034	1
CNP	non-TF	0.00373989	0.662021	0.237	0.103	1
RPL37	non-TF	5.76655e-07	0.66102	0.837	0.77	0.0087421
NT5C	non-TF	0.00143912	0.660197	0.242	0.092	1	TRUE
RASSF6	non-TF	0.00130206	0.659682	0.16	0.034	1
COL21A1	non-TF	0.00068809	0.659503	0.155	0.023	1
ERRFI1	non-TF	0.000632063	0.659023	0.139	0.011	1	TRUE
ABLIM1	non-TF	0.00246222	0.65815	0.133	0.023	1
EBF3	TF	0.00202086	0.658028	0.154	0.034	1
TUBB2A	non-TF	0.000162369	0.657389	0.219	0.046	1	TRUE
KRTCAP3	non-TF	0.000868599	0.65731	0.181	0.046	1
TPM3	non-TF	0.00509697	0.655718	0.238	0.115	1	TRUE
AKR1C1	non-TF	0.000513742	0.655674	0.161	0.023	1	TRUE
MRPL27	non-TF	0.00975604	0.655645	0.337	0.207	1
GAD1	non-TF	0.00227679	0.654487	0.17	0.046	1	TRUE
LRRFIP1	TF	0.0033786	0.654478	0.193	0.069	1
ZNF503	TF	0.00342687	0.653687	0.176	0.057	1
HLA-C	non-TF	0.000236622	0.651405	0.663	0.563	1	TRUE
NDRG1	non-TF	0.0055676	0.651299	0.167	0.057	1
RPSA	non-TF	0.00181527	0.651142	0.492	0.345	1	TRUE
ZFAND5	non-TF	0.00692076	0.649532	0.148	0.046	1
PRDX6	non-TF	0.000498437	0.643943	0.463	0.287	1
CTDSPL	non-TF	0.00230785	0.640072	0.183	0.057	1
ST8SIA2	non-TF	0.00211742	0.638702	0.205	0.069	1
FXYD4	non-TF	0.00195781	0.637779	0.139	0.023	1
MYO10	non-TF	0.00150241	0.637424	0.178	0.046	1
FYN	non-TF	0.00466019	0.637068	0.187	0.069	1	TRUE
CTSB	non-TF	0.00195871	0.63678	0.254	0.103	1	TRUE
CLDN4	non-TF	0.00184565	0.635768	0.154	0.034	1
VCL	non-TF	0.00151796	0.6352	0.176	0.046	1
AMD1	non-TF	0.0014899	0.634309	0.267	0.115	1	TRUE
MYH14	non-TF	0.00272847	0.633465	0.331	0.172	1	TRUE
NCMAP	non-TF	0.00431271	0.63261	0.139	0.034	1
KCNJ10	non-TF	0.000749415	0.629965	0.234	0.08	1	TRUE
CYR61	non-TF	0.00150087	0.629252	0.142	0.023	1
TXNDC17	non-TF	0.00457611	0.627809	0.244	0.115	1
EZR	non-TF	0.00979623	0.623668	0.295	0.172	1	TRUE
THUMPD1	non-TF	0.00527249	0.622797	0.202	0.08	1
SERF2	non-TF	4.01611e-11	0.622307	0.941	0.92	6.08842e-07
FGFBP2	non-TF	0.0039261	0.620145	0.141	0.034	1
TPI1	non-TF	0.00110196	0.619036	0.651	0.552	1
PSAT1	non-TF	0.00378589	0.616478	0.141	0.034	1
EFEMP2	non-TF	0.000872343	0.616191	0.185	0.046	1
ALDOC	non-TF	0.00848171	0.615333	0.321	0.195	1
CSRP1	non-TF	0.00608316	0.61278	0.281	0.149	1
MAP1LC3B	non-TF	0.00260767	0.612223	0.461	0.322	1
INAFM1	non-TF	0.00226895	0.612073	0.135	0.023	1
BAD	non-TF	0.00625538	0.611715	0.195	0.08	1	TRUE
DUT	non-TF	0.000304802	0.610487	0.712	0.69	1	TRUE
BEND6	non-TF	0.00184759	0.609596	0.171	0.046	1
CA14	non-TF	0.00140622	0.608809	0.196	0.057	1	TRUE
KTN1	non-TF	0.000985818	0.608778	0.665	0.563	1
PCDHB4	non-TF	0.00223469	0.608113	0.134	0.023	1
TRABD2B	non-TF	0.000965941	0.608065	0.132	0.011	1
HMGN5	non-TF	0.00193524	0.607593	0.155	0.034	1
DPYSL3	non-TF	0.00365528	0.607371	0.144	0.034	1	TRUE
CAVIN1	non-TF	0.00374852	0.605288	0.159	0.046	1
GSTZ1	non-TF	0.00277145	0.604971	0.18	0.057	1	TRUE
MYOZ1	non-TF	0.00196345	0.604743	0.157	0.034	1
RIC3	non-TF	0.00577431	0.60383	0.2	0.08	1
GNAQ	non-TF	0.00102428	0.603808	0.133	0.011	1	TRUE
AKR1C3	non-TF	0.00628713	0.603195	0.149	0.046	1	TRUE
GADD45G	non-TF	0.00117676	0.602295	0.128	0.011	1	TRUE
ZNF611	TF	0.00193326	0.602029	0.138	0.023	1
TALDO1	non-TF	0.00250243	0.601552	0.37	0.218	1
CBX1	non-TF	0.00939736	0.601548	0.308	0.184	1	TRUE
LTBP3	non-TF	0.00212668	0.599946	0.219	0.08	1
BEX5	non-TF	0.000945139	0.599345	0.302	0.126	1
TIAM1	non-TF	0.00262752	0.598397	0.168	0.046	1
PLP2	non-TF	0.00238547	0.597946	0.165	0.046	1
ST3GAL6	non-TF	0.00053685	0.596758	0.178	0.034	1
RNF213	non-TF	0.00228415	0.596423	0.235	0.092	1
LMO4	non-TF	0.00452938	0.595076	0.539	0.437	1
RPS4X	non-TF	1.113e-13	0.592706	0.976	0.977	1.6873e-09
FAU	non-TF	2.97714e-10	0.592256	0.929	0.92	4.51334e-06
NDUFB4	non-TF	0.000431486	0.591289	0.657	0.586	1	TRUE
CTSF	non-TF	0.00863317	0.588566	0.509	0.414	1	TRUE
UFC1	non-TF	0.00457085	0.587026	0.493	0.368	1
AKAP13	non-TF	0.00353246	0.586386	0.128	0.023	1	TRUE
ERGIC3	non-TF	0.00292515	0.586324	0.405	0.241	1
EDNRB	non-TF	0.00366499	0.586218	0.145	0.034	1	TRUE
GDF11	non-TF	0.00747563	0.585488	0.227	0.103	1
FLOT1	non-TF	0.00111862	0.584863	0.148	0.023	1
SRPRA	non-TF	0.00698498	0.583677	0.249	0.126	1
TECTA	non-TF	0.00108008	0.58359	0.17	0.034	1
CDH11	non-TF	0.00034829	0.583526	0.13	0	1	TRUE
CAPNS1	non-TF	0.00116475	0.582959	0.203	0.057	1
HCFC1R1	non-TF	0.00249186	0.582832	0.286	0.138	1
WLS	non-TF	0.00231807	0.580279	0.134	0.023	1
HEBP1	non-TF	0.00297337	0.578759	0.199	0.069	1	TRUE
TPPP3	non-TF	0.000547191	0.578691	0.164	0.023	1
SPG21	non-TF	0.00354044	0.57756	0.163	0.046	1
LRP1	non-TF	0.00587183	0.576586	0.136	0.034	1	TRUE
ATP2B4	non-TF	0.00136728	0.575224	0.163	0.034	1
GPC1	non-TF	0.00456196	0.574832	0.158	0.046	1
SKP1	non-TF	8.43271e-19	0.572678	0.993	1	1.2784e-14
ZFHX3	TF	0.00478632	0.572629	0.189	0.069	1
FAM114A1	non-TF	0.00139464	0.572107	0.144	0.023	1
ARPP19	non-TF	0.00235532	0.570747	0.295	0.138	1
VAMP8	non-TF	0.00802847	0.570686	0.422	0.299	1
DUSP23	non-TF	0.00079852	0.568991	0.155	0.023	1
LINC00511	non-TF	0.00154544	0.56891	0.125	0.011	1
RHBDD3	non-TF	0.00296414	0.566058	0.148	0.034	1
THRA	TF	0.00816558	0.565512	0.224	0.103	1	TRUE
BEX3	non-TF	0.000185229	0.565508	0.743	0.701	1
SLC44A2	non-TF	0.000642325	0.565178	0.236	0.069	1
SEC11C	non-TF	0.00187079	0.564489	0.667	0.609	1
RTL8A	non-TF	0.00479773	0.563742	0.23	0.103	1
SRRM1	non-TF	0.00298669	0.563434	0.597	0.46	1
SH2D4A	non-TF	0.00517733	0.560254	0.157	0.046	1
PGM5	non-TF	0.00619992	0.560205	0.151	0.046	1
CPA6	non-TF	0.00109131	0.560002	0.129	0.011	1	TRUE
HDHD3	non-TF	0.00303288	0.559585	0.166	0.046	1
TMEM8A	non-TF	0.00380035	0.557365	0.163	0.046	1
SLC35D2	non-TF	0.00737389	0.556923	0.13	0.034	1
PPP4R2	non-TF	0.00559366	0.555882	0.222	0.092	1
BLVRB	non-TF	0.00597695	0.555634	0.167	0.057	1	TRUE
DSP	non-TF	0.00344257	0.554288	0.163	0.046	1	TRUE
SMOX	non-TF	0.001647	0.550911	0.141	0.023	1	TRUE
RDH11	non-TF	0.00448232	0.55071	0.196	0.069	1
PRLH	non-TF	0.00917903	0.550274	0.112	0.023	1
MRPS18A	non-TF	0.00493229	0.549463	0.203	0.08	1
FRZB	non-TF	0.00614338	0.548127	0.181	0.069	1
RAP1A	non-TF	0.00678019	0.547663	0.132	0.034	1
CYB5A	non-TF	0.00130027	0.545369	0.692	0.655	1
BCL7A	non-TF	0.00706814	0.545048	0.301	0.161	1
MX1	non-TF	0.00230093	0.544466	0.117	0.011	1
BCL6	TF	0.0061519	0.543329	0.199	0.08	1	TRUE
MED29	non-TF	0.00508185	0.542099	0.14	0.034	1
RPS12	non-TF	6.33332e-09	0.541703	0.936	0.966	9.60132e-05
CYBRD1	non-TF	0.00458073	0.541391	0.123	0.023	1
CNPY2	non-TF	0.00868637	0.540997	0.479	0.368	1
BX255923.1	non-TF	0.00112423	0.539877	0.11	0	1
YBX3	TF	0.000606753	0.53838	0.121	0	1
SNHG7	non-TF	0.000686299	0.537543	0.139	0.011	1
CA6	non-TF	0.00367873	0.536947	0.127	0.023	1	TRUE
MAGED2	non-TF	0.00220726	0.536725	0.331	0.172	1
PTPRF	non-TF	0.00775311	0.53575	0.163	0.057	1	TRUE
ECE1	non-TF	0.00324594	0.534086	0.148	0.034	1	TRUE
FBXO21	non-TF	0.00812952	0.533485	0.209	0.092	1
LAMB3	non-TF	0.000650044	0.533432	0.12	0	1	TRUE
PHGDH	non-TF	0.00199082	0.532932	0.138	0.023	1
RPS27	non-TF	1.01762e-06	0.532173	0.896	0.92	0.0154271
PDCL3	non-TF	0.00951015	0.531051	0.237	0.115	1
SNHG9	non-TF	0.00274344	0.530371	0.279	0.126	1
PACSIN3	non-TF	0.00411024	0.529696	0.144	0.034	1
KLF5	TF	0.00719699	0.528767	0.147	0.046	1	TRUE
SF3B2	non-TF	0.00872644	0.527862	0.391	0.253	1	TRUE
DNASE2	non-TF	0.0015498	0.527434	0.161	0.034	1
GJB2	non-TF	0.00328858	0.526536	0.112	0.011	1	TRUE
RCAN2	non-TF	0.00856723	0.525553	0.146	0.046	1
RAB9A	non-TF	0.00227908	0.524317	0.157	0.034	1	TRUE
SNX17	non-TF	0.00937596	0.524309	0.174	0.069	1
PDE4B	non-TF	0.00847027	0.523903	0.128	0.034	1	TRUE
DLGAP1-AS1	non-TF	0.000566287	0.522446	0.122	0	1
MYL9	non-TF	0.00681031	0.522269	0.132	0.034	1
GPX3	non-TF	0.00571724	0.520551	0.138	0.034	1
GPR37	non-TF	0.00135839	0.519364	0.146	0.023	1	TRUE
ATP11A	non-TF	0.00865116	0.516241	0.13	0.034	1
C6orf141	non-TF	0.00397089	0.515361	0.126	0.023	1
ALDH1L1	non-TF	0.0023361	0.514824	0.135	0.023	1	TRUE
SYT11	non-TF	0.0037321	0.514305	0.147	0.034	1
SLC44A1	non-TF	0.00376187	0.513873	0.109	0.011	1	TRUE
S1PR2	non-TF	0.00170793	0.513139	0.14	0.023	1	TRUE
BOD1	non-TF	0.00611503	0.512629	0.119	0.023	1
RNF24	non-TF	0.00499221	0.510274	0.14	0.034	1
RGN	non-TF	0.00596903	0.50975	0.187	0.069	1
AFAP1L2	non-TF	0.00218255	0.50835	0.12	0.011	1
RHEB	non-TF	0.00839856	0.508253	0.474	0.356	1	TRUE
KAZALD1	non-TF	0.00555486	0.507761	0.138	0.034	1
COMMD6	non-TF	0.00064425	0.506545	0.607	0.483	1
RPS26	non-TF	1.39025e-05	0.506544	0.87	0.874	0.210762
TCEAL5	non-TF	0.0075914	0.506204	0.181	0.069	1
RPL11	non-TF	2.36475e-08	0.505819	0.94	0.943	0.000358496
FRMD4A	non-TF	0.00195388	0.505624	0.121	0.011	1
NFE2L1	TF	0.00845669	0.505018	0.297	0.161	1
TMEM47	non-TF	0.0022072	0.504875	0.117	0.011	1
GALNT2	non-TF	0.00437615	0.504572	0.142	0.034	1	TRUE
ZNRF3	non-TF	0.00193686	0.502864	0.12	0.011	1
RPLP2	non-TF	6.8677e-05	0.502721	0.847	0.839	1
P4HA1	non-TF	0.00507279	0.502171	0.122	0.023	1	TRUE
SREBF1	TF	0.0083025	0.500675	0.265	0.138	1	TRUE
CAVIN3	non-TF	0.00193288	0.499895	0.101	0	1
IL6ST	non-TF	0.00562919	0.498024	0.19	0.069	1	TRUE
ARHGEF9	non-TF	0.00518726	0.497248	0.153	0.046	1
COL16A1	non-TF	0.0035401	0.496319	0.11	0.011	1
IGBP1	non-TF	0.00529795	0.49613	0.189	0.069	1
BTF3	non-TF	0.000360419	0.495549	0.747	0.736	1
PPP2CA	non-TF	0.00880515	0.49496	0.11	0.023	1	TRUE
LGALS1	non-TF	0.005745	0.494767	0.101	0.011	1	TRUE
MRPL2	non-TF	0.00734933	0.494552	0.166	0.057	1
PDE4DIP	non-TF	0.00843766	0.493547	0.13	0.034	1
AP001528.2	non-TF	0.00406963	0.493535	0.108	0.011	1
GALNT10	non-TF	0.00547248	0.491902	0.12	0.023	1
SRSF3	non-TF	0.0072227	0.491002	0.372	0.23	1
RPS27A	non-TF	4.29862e-09	0.490729	0.954	0.977	6.51671e-05
RBMS3	non-TF	0.00668885	0.490125	0.116	0.023	1	TRUE
CCDC152	non-TF	0.00701023	0.490089	0.116	0.023	1
RPS15A	non-TF	0.000100294	0.489853	0.855	0.828	1
TMEM25	non-TF	0.00204892	0.489321	0.119	0.011	1
SOX13	TF	0.00687763	0.487506	0.117	0.023	1
CCDC74B	non-TF	0.00204402	0.485971	0.136	0.023	1
S100A14	non-TF	0.00714319	0.484085	0.18	0.069	1
HES4	TF	0.00377639	0.482702	0.109	0.011	1
SAP30BP	non-TF	0.00861179	0.48208	0.165	0.057	1
NPM3	non-TF	0.00219095	0.480477	0.154	0.034	1
GSTM5	non-TF	0.0050319	0.479919	0.104	0.011	1
SH3GLB1	non-TF	0.00461998	0.478654	0.179	0.057	1
RPS13	non-TF	4.51343e-10	0.478439	0.97	0.966	6.84236e-06
GGCT	non-TF	0.00858015	0.474499	0.129	0.034	1	TRUE
KDELR1	non-TF	0.00482761	0.472653	0.249	0.115	1
UBE2N	non-TF	0.00738096	0.471552	0.233	0.103	1	TRUE
SOX1	TF	0.00250693	0.47136	0.119	0.011	1
ITGB8	non-TF	0.00577443	0.470662	0.101	0.011	1	TRUE
TSPAN7	non-TF	0.00649853	0.468395	0.136	0.034	1
DLX6	TF	0.00953068	0.466059	0.11	0.023	1
SLC12A6	non-TF	0.00741738	0.465303	0.115	0.023	1	TRUE
RTL8C	non-TF	0.00858647	0.465206	0.164	0.057	1
RPS9	non-TF	0.000119362	0.464787	0.821	0.805	1
FKBP9	non-TF	0.0052276	0.464328	0.104	0.011	1
RPL5	non-TF	1.03464e-05	0.46401	0.936	0.908	0.156852
RPS2	non-TF	0.00165202	0.462013	0.743	0.701	1	TRUE
RPL23	non-TF	0.0001832	0.460937	0.839	0.862	1
TRIP6	non-TF	0.00590227	0.457908	0.153	0.046	1
FZD7	non-TF	0.00589919	0.457652	0.121	0.023	1	TRUE
TAGLN3	non-TF	0.00312332	0.453182	0.148	0.034	1
PLLP	non-TF	0.00616708	0.450918	0.17	0.057	1
GSDMD	non-TF	0.00178274	0.45067	0.125	0.011	1
KCNG1	non-TF	0.00463638	0.449096	0.104	0.011	1	TRUE
FMO5	non-TF	0.00225791	0.44826	0.176	0.046	1	TRUE
CSTB	non-TF	0.00195539	0.446783	0.682	0.69	1
COMMD7	non-TF	0.00651505	0.445745	0.135	0.034	1
CPQ	non-TF	0.000704637	0.444799	0.25	0.08	1
PTPN18	non-TF	0.00847588	0.442849	0.145	0.046	1
CTSS	non-TF	0.00455045	0.441582	0.107	0.011	1	TRUE
ZNF330	non-TF	0.0081647	0.435336	0.114	0.023	1
CERS2	non-TF	0.00532221	0.427899	0.141	0.034	1
QKI	non-TF	0.00504758	0.427024	0.106	0.011	1
SNHG25	non-TF	0.00373584	0.425862	0.11	0.011	1
RPL18	non-TF	0.000112412	0.420676	0.856	0.839	1
WNT7A	non-TF	0.00464652	0.419948	0.123	0.023	1	TRUE
PPP3CA	non-TF	0.00606882	0.418872	0.249	0.115	1	TRUE
BCL11A	TF	0.00863182	0.418852	0.114	0.023	1
UBL5	non-TF	0.00251349	0.417101	0.785	0.782	1
CCDC88C	non-TF	0.00643268	0.413047	0.101	0.011	1
EMP1	non-TF	0.00180683	0.406199	0.102	0	1	TRUE
ACTN4	non-TF	0.000886459	0.393358	0.629	0.517	1
AC092171.3	non-TF	0.00655085	0.392482	0.121	0.023	1
AC135782.1	non-TF	0.00498397	0.389956	0.106	0.011	1
RPS8	non-TF	3.52149e-05	0.383873	0.934	0.943	0.533858
PPIC	non-TF	0.00352449	0.383799	0.112	0.011	1
ANKRD10	non-TF	0.00554565	0.371896	0.142	0.034	1
TSKU	non-TF	0.00239208	0.370486	0.171	0.046	1
RPL32	non-TF	6.32461e-05	0.367683	0.957	0.954	0.958811
PFKL	non-TF	0.00573872	0.363634	0.103	0.011	1
MCRIP1	non-TF	0.00952401	0.358388	0.132	0.034	1
TMEM258	non-TF	0.00948342	0.357846	0.662	0.621	1
RAB25	non-TF	0.00879613	0.351858	0.132	0.034	1
FKBP1B	non-TF	0.00512239	0.342193	0.104	0.011	1
RPS3A	non-TF	1.57746e-05	0.32843	0.974	0.989	0.239144
VAT1	non-TF	0.0096676	0.326518	0.132	0.034	1
RPL39	non-TF	0.00179517	0.315703	0.924	0.931	1
RPS6	non-TF	0.00651115	0.308964	0.798	0.782	1
RPL28	non-TF	0.00190771	0.308534	0.866	0.874	1
ELOB	non-TF	0.00384256	0.305034	0.766	0.747	1
RPL13A	non-TF	0.00486105	0.293872	0.861	0.862	1
GAPDH	non-TF	0.00048667	0.291836	0.906	0.931	1	TRUE
RPS5	non-TF	0.0043837	0.280498	0.809	0.851	1
SRP14	non-TF	0.00170705	0.270906	0.935	0.977	1
RPL26	non-TF	0.000842825	0.251271	0.961	0.989	1
RPL34	non-TF	0.000989093	0.250317	0.983	1	1
OTUD3	non-TF	4.90885e-05	-0.250693	0.024	0.103	0.744181
SPRTN	non-TF	0.0017217	-0.253151	0.04	0.115	1
HELQ	non-TF	0.00322168	-0.258492	0.037	0.103	1
RPAIN	non-TF	0.0038995	-0.25883	0.268	0.414	1
AC060780.1	non-TF	0.00729629	-0.260127	0.062	0.138	1
DCTN1	non-TF	0.00150482	-0.260729	0.074	0.172	1
BEND7	non-TF	0.000830517	-0.264965	0.05	0.138	1
NDRG3	non-TF	0.00334809	-0.266149	0.037	0.103	1
PLA2G12A	non-TF	0.000381391	-0.26631	0.034	0.115	1
ARL4A	non-TF	0.00423864	-0.26632	0.316	0.471	1
PRPF40A	non-TF	0.00742649	-0.267688	0.163	0.276	1
LYRM7	non-TF	0.00404223	-0.268445	0.044	0.115	1
WDR70	non-TF	0.00689704	-0.268917	0.04	0.103	1
TPT1	non-TF	0.00292373	-0.26898	0.855	0.943	1	TRUE
TM7SF2	non-TF	0.00317476	-0.270697	0.266	0.414	1
PDHA1	non-TF	0.00394981	-0.273874	0.173	0.299	1	TRUE
SCAMP5	non-TF	6.44432e-06	-0.27458	0.02	0.103	0.0976959
CCDC191	non-TF	3.71385e-06	-0.274839	0.047	0.172	0.056302
VAMP2	non-TF	0.00275613	-0.275382	0.474	0.667	1	TRUE
RCC1L	non-TF	0.000506937	-0.277139	0.036	0.115	1
ATP2B1	non-TF	0.00480492	-0.277502	0.158	0.276	1	TRUE
GSTM4	non-TF	0.00177609	-0.277517	0.034	0.103	1
DCUN1D5	non-TF	0.00190401	-0.280087	0.047	0.126	1
WRB	non-TF	0.00106588	-0.280352	0.094	0.207	1
SNAPC1	non-TF	0.000793347	-0.283998	0.084	0.195	1
HECTD4	non-TF	0.00768699	-0.284339	0.042	0.103	1
AQP11	non-TF	0.00188223	-0.284518	0.034	0.103	1
CHCHD3	non-TF	0.00668115	-0.286783	0.109	0.207	1
LENG1	non-TF	0.00588325	-0.287734	0.06	0.138	1
PTPN3	non-TF	3.00028e-05	-0.287814	0.023	0.103	0.454842
CLINT1	non-TF	0.00712943	-0.290132	0.136	0.241	1
CKAP2	non-TF	0.00010399	-0.292376	0.037	0.126	1
PPP1R12A	non-TF	0.0085356	-0.2932	0.139	0.241	1
TCEAL4	non-TF	0.00387116	-0.293819	0.531	0.724	1
SF3B1	non-TF	0.00958524	-0.295919	0.257	0.379	1	TRUE
UQCRFS1	non-TF	0.00533428	-0.297191	0.311	0.448	1
MSL3	non-TF	0.00900164	-0.29763	0.064	0.138	1
EIF3K	non-TF	0.00568274	-0.297659	0.524	0.701	1
MAP1A	non-TF	0.00097887	-0.299555	0.032	0.103	1
REX1BD	non-TF	0.00660381	-0.300185	0.304	0.437	1
PAWR	non-TF	0.00285624	-0.301138	0.119	0.23	1
NAP1L4	non-TF	0.00533664	-0.301307	0.215	0.345	1
POLR2H	non-TF	4.70726e-05	-0.303028	0.106	0.253	0.71362
EPS8	non-TF	0.00127058	-0.30501	0.039	0.115	1
ATP5MC1	non-TF	0.00306936	-0.305312	0.498	0.678	1
PCNP	non-TF	0.00255969	-0.30562	0.196	0.333	1
DEAF1	TF	0.0028335	-0.306052	0.064	0.149	1
DNAJC12	non-TF	8.42122e-07	-0.306367	0.025	0.126	0.0127666
CALCOCO1	non-TF	0.00426076	-0.306579	0.066	0.149	1
HSP90AB1	non-TF	0.000203549	-0.307667	0.87	0.954	1	TRUE
EMC1	non-TF	0.000319492	-0.308092	0.052	0.149	1
HSD17B8	non-TF	0.0062724	-0.309489	0.102	0.195	1
C6orf106	non-TF	0.00224842	-0.309938	0.036	0.103	1
GPSM2	non-TF	0.00487122	-0.310547	0.068	0.149	1
EXOC6	non-TF	7.81423e-05	-0.311507	0.025	0.103	1
FAM76A	non-TF	0.00373109	-0.311631	0.081	0.172	1
CMTM8	non-TF	0.0055922	-0.312039	0.053	0.126	1	TRUE
OCEL1	non-TF	0.000601558	-0.312077	0.049	0.138	1
FASN	non-TF	6.08458e-05	-0.312485	0.04	0.138	0.922423	TRUE
UBE2S	non-TF	0.0072835	-0.316521	0.112	0.207	1
FAM171B	non-TF	0.000223708	-0.316549	0.033	0.115	1
SRPK1	non-TF	0.00679163	-0.317058	0.062	0.138	1	TRUE
RPS7	non-TF	0.000401886	-0.317176	0.867	0.966	1
MPHOSPH6	non-TF	0.00342508	-0.317937	0.193	0.322	1
AGTRAP	non-TF	0.00974064	-0.318264	0.081	0.161	1
COX20	non-TF	0.00344984	-0.320954	0.391	0.552	1
RPL19	non-TF	7.60457e-05	-0.32116	0.93	0.977	1
NDUFA3	non-TF	0.00639009	-0.321765	0.395	0.552	1	TRUE
POLR3D	non-TF	0.000961364	-0.32186	0.045	0.126	1
RARA-AS1	non-TF	6.0648e-05	-0.324318	0.03	0.115	0.919424
HSPA4L	non-TF	0.003397	-0.325442	0.057	0.138	1
SPTAN1	non-TF	0.00439863	-0.326119	0.107	0.207	1
DGAT1	non-TF	0.00211635	-0.326242	0.036	0.103	1	TRUE
SUZ12	non-TF	0.00514989	-0.328286	0.151	0.264	1
KSR2	non-TF	0.00383822	-0.328798	0.038	0.103	1
CCDC110	non-TF	4.25203e-05	-0.328946	0.024	0.103	0.644608
NTHL1	non-TF	9.68433e-05	-0.329069	0.049	0.149	1
PELI3	non-TF	6.09684e-07	-0.329436	0.017	0.103	0.00924281
RPL4	non-TF	0.00755582	-0.329599	0.353	0.494	1
PAX2	TF	0.000132454	-0.329721	0.026	0.103	1	TRUE
TECR	non-TF	0.00848714	-0.330493	0.33	0.46	1
PDLIM3	non-TF	0.0074593	-0.331422	0.063	0.138	1
GLRX5	non-TF	0.00347119	-0.332634	0.313	0.46	1
ACOT8	non-TF	0.00228882	-0.332676	0.043	0.115	1
CLPTM1	non-TF	0.00145694	-0.333132	0.068	0.161	1
KDM3A	non-TF	1.24178e-05	-0.335827	0.031	0.126	0.188254	TRUE
NRXN1	non-TF	3.6412e-05	-0.335863	0.028	0.115	0.552005	TRUE
NAALADL2	non-TF	9.46132e-08	-0.336654	0.014	0.103	0.00143434
ISCA2	non-TF	0.00913607	-0.338509	0.133	0.23	1
PHF21A	non-TF	0.000613917	-0.338818	0.031	0.103	1
MAGIX	non-TF	0.00093571	-0.338951	0.045	0.126	1
UBE2Q1	non-TF	0.00330856	-0.339174	0.174	0.299	1
HNRNPC	non-TF	0.00454578	-0.33919	0.325	0.46	1	TRUE
SET	non-TF	0.00452815	-0.340227	0.478	0.621	1
MED25	non-TF	0.00422226	-0.34098	0.045	0.115	1
CSPP1	non-TF	0.000944473	-0.341222	0.032	0.103	1
AC106897.1	non-TF	2.27783e-05	-0.341638	0.023	0.103	0.345319
CHORDC1	non-TF	0.00661545	-0.342165	0.055	0.126	1
CLPP	non-TF	0.0010781	-0.342715	0.129	0.253	1
NDUFS3	non-TF	0.0092487	-0.344521	0.215	0.322	1	TRUE
ACAP1	non-TF	0.0035812	-0.344534	0.089	0.184	1
IRAK1BP1	non-TF	0.00206893	-0.34476	0.055	0.138	1
KIF27	non-TF	7.8196e-07	-0.344889	0.017	0.103	0.0118545
RAB3IP	non-TF	0.00210948	-0.345751	0.102	0.207	1
ROCK2	non-TF	0.00216669	-0.345987	0.062	0.149	1	TRUE
CCT4	non-TF	0.0055476	-0.346903	0.177	0.299	1
SMIM37	non-TF	0.00452239	-0.346994	0.12	0.218	1
ATP5MPL	non-TF	0.0059257	-0.347218	0.489	0.655	1
LRRC49	non-TF	0.000477899	-0.348052	0.03	0.103	1
UQCRB	non-TF	0.00181466	-0.349106	0.871	0.966	1	TRUE
NUB1	non-TF	0.00664248	-0.349825	0.117	0.218	1
TM2D3	non-TF	0.00569635	-0.350236	0.186	0.31	1
ATOH1	TF	9.29285e-08	-0.350327	0.014	0.103	0.0014088
APLP1	non-TF	0.000175599	-0.351269	0.027	0.103	1
POLD3	non-TF	0.000493463	-0.352391	0.069	0.172	1
EIF1AX	non-TF	0.00974874	-0.353338	0.442	0.586	1
ULK4	non-TF	1.91397e-12	-0.354245	0.008	0.115	2.90157e-08
EFHB	non-TF	0.000608195	-0.355526	0.031	0.103	1
AAMP	non-TF	0.00215954	-0.356885	0.119	0.23	1
MLEC	non-TF	0.00517561	-0.359507	0.543	0.736	1
TRMT112	non-TF	0.00213076	-0.362988	0.46	0.644	1
WDR34	non-TF	0.000148669	-0.363649	0.062	0.172	1
OMA1	non-TF	0.00495815	-0.364867	0.039	0.103	1
AC025244.1	non-TF	1.48458e-18	-0.364956	0.001	0.103	2.25062e-14
GSS	non-TF	0.000991875	-0.365137	0.081	0.184	1
CCT3	non-TF	0.00409529	-0.366103	0.42	0.563	1
NSRP1	non-TF	0.00368974	-0.366285	0.313	0.448	1
CDK5	non-TF	0.00064029	-0.366996	0.031	0.103	1	TRUE
DYNC1I2	non-TF	0.00544547	-0.367657	0.287	0.414	1
CDCA7L	non-TF	5.12251e-06	-0.367778	0.02	0.103	0.0776573
RBM19	non-TF	0.00533017	-0.368448	0.101	0.195	1
OSTM1	non-TF	0.000531609	-0.372311	0.049	0.138	1
PLA2G16	non-TF	0.00105124	-0.373011	0.409	0.586	1
BORCS8	non-TF	0.00077839	-0.373173	0.051	0.138	1
CD82	non-TF	0.000201196	-0.373431	0.033	0.115	1	TRUE
ALAS1	non-TF	0.00784474	-0.375653	0.042	0.103	1
RNF157	non-TF	0.00202701	-0.375981	0.102	0.207	1
CCT8	non-TF	8.28997e-05	-0.376099	0.152	0.322	1
RUFY3	non-TF	0.00477484	-0.376186	0.068	0.149	1
PPP1R16A	non-TF	0.000130809	-0.37716	0.049	0.149	1
ZNF593	non-TF	0.00641279	-0.377656	0.185	0.299	1
KPNA5	non-TF	0.00935678	-0.377999	0.074	0.149	1
TNPO2	non-TF	0.000539777	-0.378892	0.043	0.126	1
AGPAT3	non-TF	0.00976182	-0.379294	0.049	0.115	1
FRY	non-TF	0.000348406	-0.379579	0.04	0.126	1
API5	non-TF	4.82461e-06	-0.379667	0.028	0.126	0.0731412
MZT2B	non-TF	0.0012519	-0.379835	0.427	0.621	1
FGFR1OP2	non-TF	0.00415037	-0.380239	0.088	0.184	1	TRUE
CCDC30	non-TF	0.000250762	-0.380411	0.052	0.149	1
TANC2	non-TF	1.99694e-05	-0.380955	0.037	0.138	0.302736	TRUE
POP7	non-TF	0.00557246	-0.381636	0.145	0.253	1
POLR2L	non-TF	0.00171308	-0.381911	0.349	0.517	1
GLYR1	non-TF	4.24218e-05	-0.383175	0.039	0.138	0.643115
CCDC136	non-TF	0.000262337	-0.383687	0.046	0.138	1
DCAF6	non-TF	0.000191766	-0.385229	0.051	0.149	1
CASD1	non-TF	1.75237e-07	-0.386743	0.045	0.184	0.00265659
SSB	non-TF	0.00967763	-0.387346	0.548	0.667	1
ATP6V0D1	non-TF	0.00870137	-0.388439	0.184	0.299	1
RUNDC3A-AS1	non-TF	1.51591e-18	-0.388566	0.001	0.103	2.29813e-14
CDC25B	non-TF	3.96261e-07	-0.389164	0.02	0.115	0.00600732	TRUE
GSPT2	non-TF	0.000939111	-0.389707	0.052	0.138	1
AL022328.4	non-TF	0.000201311	-0.389793	0.039	0.126	1
MT-ND3	non-TF	6.42284e-11	-0.39074	0.995	0.989	9.73702e-07	TRUE
EIF3E	non-TF	0.00338379	-0.391156	0.524	0.678	1
KIAA1211	non-TF	7.75308e-06	-0.391359	0.03	0.126	0.117537
MTRNR2L12	non-TF	0.00600905	-0.391627	0.286	0.414	1
REXO2	non-TF	0.000505241	-0.392165	0.157	0.299	1
UHMK1	non-TF	1.31552e-05	-0.3922	0.046	0.161	0.199433
MRPS35	non-TF	8.57383e-05	-0.392783	0.081	0.207	1
DAXX	non-TF	0.000401292	-0.393385	0.047	0.138	1
ZC3H14	non-TF	0.00253995	-0.393596	0.087	0.184	1
KLC2	non-TF	8.6585e-09	-0.393933	0.012	0.103	0.000131263
SUPT5H	non-TF	0.00811786	-0.394577	0.081	0.161	1
TM2D1	non-TF	0.00389669	-0.395182	0.367	0.506	1
SERPINB6	non-TF	0.000281607	-0.39529	0.356	0.54	1
EXPH5	non-TF	0.00123335	-0.395291	0.066	0.161	1
TAF9	non-TF	0.000160302	-0.39542	0.106	0.241	1
PLXDC2	non-TF	2.81695e-06	-0.395667	0.032	0.138	0.0427049
CERS5	non-TF	0.00356584	-0.396263	0.148	0.264	1
PPP1R7	non-TF	0.00608957	-0.397289	0.11	0.207	1
LSM4	non-TF	0.00504806	-0.397986	0.236	0.356	1
CHRNA1	non-TF	1.8483e-09	-0.398147	0.017	0.126	2.80203e-05	TRUE
NT5C3B	non-TF	0.00106251	-0.398936	0.081	0.184	1
UBB	non-TF	2.60433e-07	-0.399153	0.96	1	0.00394816
HOOK1	non-TF	0.000731848	-0.402616	0.127	0.253	1
PINK1	non-TF	0.00130425	-0.40265	0.106	0.218	1
ZER1	non-TF	0.000245832	-0.404804	0.04	0.126	1
DCDC2B	non-TF	1.45388e-18	-0.405408	0.001	0.103	2.20409e-14
ORAI2	non-TF	0.000151423	-0.406	0.063	0.172	1	TRUE
GOLGB1	non-TF	4.48275e-05	-0.406153	0.193	0.379	0.679585
GOLGA1	non-TF	0.000888721	-0.40794	0.058	0.149	1
FAM173B	non-TF	7.28607e-09	-0.409619	0.012	0.103	0.000110457
PKP2	non-TF	0.000562763	-0.410882	0.05	0.138	1
YIF1B	non-TF	1.4084e-05	-0.411504	0.053	0.172	0.213514
TEX10	non-TF	3.6865e-09	-0.411842	0.014	0.115	5.58874e-05	TRUE
AL662796.1	non-TF	0.00011804	-0.413244	0.032	0.115	1
PCBP2	non-TF	0.0069576	-0.413759	0.205	0.322	1
CDV3	non-TF	0.00924634	-0.413899	0.154	0.253	1
PIP4P1	non-TF	0.00290939	-0.415764	0.122	0.23	1
RSL1D1	non-TF	1.40293e-05	-0.41595	0.215	0.425	0.212684
ZMIZ2	TF	0.0036353	-0.416671	0.065	0.149	1
SNTG2	non-TF	3.48389e-05	-0.416829	0.024	0.103	0.528157
PEG10	non-TF	0.00727684	-0.417029	0.113	0.207	1
HSPA12A	non-TF	7.98394e-09	-0.417474	0.012	0.103	0.000121036
KLF13	TF	1.72421e-06	-0.41781	0.031	0.138	0.026139
ASNA1	non-TF	0.00243675	-0.417962	0.174	0.299	1
ABRAXAS1	non-TF	3.08757e-06	-0.418409	0.033	0.138	0.0468075
STPG1	non-TF	2.56135e-08	-0.418576	0.013	0.103	0.000388301
GAL3ST3	non-TF	6.75354e-05	-0.418929	0.042	0.138	1
CYB561	non-TF	0.00565581	-0.419187	0.094	0.184	1
COQ10A	non-TF	2.58233e-06	-0.41948	0.043	0.161	0.0391481
RABL2A	non-TF	1.83636e-07	-0.420445	0.019	0.115	0.00278392
DDX24	non-TF	0.00309875	-0.420761	0.433	0.575	1
HERC2	non-TF	0.00373205	-0.420883	0.151	0.264	1	TRUE
COX4I1	non-TF	0.00120136	-0.421771	0.728	0.908	1
RUFY2	non-TF	0.000440534	-0.422137	0.055	0.149	1
GSTP1	non-TF	7.41913e-05	-0.423809	0.91	0.966	1	TRUE
AP3D1	non-TF	0.00175955	-0.424062	0.085	0.184	1
CFAP44	non-TF	6.26183e-10	-0.424824	0.019	0.138	9.49293e-06	TRUE
H1FX	non-TF	0.00155932	-0.425313	0.384	0.54	1
CGN	non-TF	0.00034878	-0.42605	0.047	0.138	1
SPATA33	non-TF	0.00399006	-0.427193	0.091	0.184	1
ZSCAN16-AS1	non-TF	0.00185699	-0.427263	0.314	0.471	1
CYTH2	non-TF	0.00198828	-0.427547	0.084	0.184	1	TRUE
EIF3G	non-TF	0.00236503	-0.427586	0.254	0.391	1
REV3L	non-TF	2.09391e-06	-0.427916	0.037	0.149	0.0317437	TRUE
AIG1	non-TF	0.00998787	-0.428404	0.262	0.379	1
RPA3	non-TF	0.00581834	-0.428809	0.218	0.333	1
DAW1	non-TF	6.75226e-21	-0.429072	0	0.103	1.02364e-16
PTGES3	non-TF	0.000360399	-0.429115	0.348	0.54	1	TRUE
SIGIRR	non-TF	0.00297629	-0.429665	0.113	0.218	1	TRUE
COMMD3	non-TF	0.000516875	-0.430347	0.251	0.414	1
NBAS	non-TF	7.24056e-05	-0.430899	0.042	0.138	1
RPS28	non-TF	8.04028e-07	-0.431489	0.905	0.989	0.0121891
ERP29	non-TF	0.00252879	-0.432165	0.578	0.747	1
FDXR	non-TF	2.34092e-05	-0.432693	0.038	0.138	0.354884
KBTBD11	non-TF	0.00046283	-0.432759	0.104	0.23	1
IDH3A	non-TF	9.83415e-05	-0.432839	0.026	0.103	1
RNF216	non-TF	0.00104577	-0.43299	0.116	0.23	1
MAP3K2	non-TF	0.00465836	-0.433146	0.053	0.126	1	TRUE
DYNC2H1	non-TF	3.60058e-05	-0.433361	0.028	0.115	0.545848	TRUE
PRKAR2A	non-TF	1.45677e-05	-0.433606	0.065	0.195	0.220846
RRP8	non-TF	1.35855e-06	-0.433679	0.031	0.138	0.0205956
DHRS7B	non-TF	0.00668903	-0.43405	0.158	0.264	1
FAM104B	non-TF	0.0001391	-0.434372	0.07	0.184	1
NDUFA10	non-TF	0.0058133	-0.43696	0.262	0.379	1	TRUE
PPIP5K2	non-TF	5.614e-05	-0.438184	0.04	0.138	0.851082
TP53BP1	non-TF	6.89505e-07	-0.438339	0.044	0.172	0.0104529
MDH1B	non-TF	1.70724e-06	-0.438978	0.023	0.115	0.0258818
ATP6V1B2	non-TF	3.01651e-05	-0.439886	0.044	0.149	0.457303	TRUE
LRWD1	non-TF	9.21374e-07	-0.440885	0.021	0.115	0.013968
CDK5RAP2	non-TF	9.02793e-05	-0.443597	0.14	0.299	1
ARHGEF33	non-TF	7.54538e-08	-0.444481	0.018	0.115	0.00114388
TXNDC9	non-TF	0.00147326	-0.445752	0.108	0.218	1
RNF8	non-TF	0.000678082	-0.446167	0.127	0.253	1	TRUE
SOD1	non-TF	1.24639e-06	-0.446537	0.815	0.931	0.0188952	TRUE
ZNF451	non-TF	3.5429e-07	-0.446822	0.053	0.195	0.00537104
PIGS	non-TF	0.000141279	-0.447206	0.057	0.161	1
MYCBP	non-TF	5.01744e-07	-0.447467	0.033	0.149	0.00760643
TBC1D14	non-TF	0.0074709	-0.447932	0.057	0.126	1
CCDC186	non-TF	0.00116599	-0.448875	0.153	0.287	1
NUDT16L1	non-TF	0.00341069	-0.451379	0.199	0.322	1
ZNF487	TF	0.00153959	-0.452957	0.077	0.172	1
PNMA1	non-TF	0.000291158	-0.453741	0.059	0.161	1
LRRC27	non-TF	1.21742e-06	-0.453931	0.026	0.126	0.018456
NHLRC2	non-TF	4.61726e-07	-0.454344	0.07	0.23	0.00699976
FAM71E1	non-TF	1.72354e-05	-0.454376	0.038	0.138	0.261288
ADIPOR2	non-TF	0.00356619	-0.454992	0.083	0.172	1
AL022068.1	non-TF	8.54351e-07	-0.455992	0.051	0.184	0.012952
GDI1	non-TF	0.000113651	-0.455999	0.113	0.253	1
LYST	non-TF	7.86521e-08	-0.456925	0.018	0.115	0.00119237
COX5B	non-TF	4.21803e-05	-0.456995	0.689	0.897	0.639453
TCHP	non-TF	0.00161622	-0.457027	0.141	0.264	1
ARID4B	TF	0.00421022	-0.457606	0.133	0.241	1
RPP38	non-TF	0.000890368	-0.458057	0.079	0.184	1
CFAP53	non-TF	4.65902e-09	-0.458205	0.018	0.126	7.06308e-05
CISD1	non-TF	0.00271081	-0.458247	0.189	0.31	1
PFDN1	non-TF	0.000405095	-0.458932	0.267	0.437	1
ATP5MD	non-TF	0.000340079	-0.459279	0.496	0.701	1
ARFGAP3	non-TF	0.00183005	-0.459905	0.203	0.333	1
DLL1	non-TF	6.75226e-21	-0.459912	0	0.103	1.02364e-16
MBTPS1	non-TF	0.000139559	-0.460165	0.114	0.253	1	TRUE
MT-ATP6	non-TF	1.17037e-15	-0.460713	0.999	1	1.77427e-11
NDUFB10	non-TF	8.92775e-05	-0.460954	0.556	0.805	1	TRUE
ATP6AP2	non-TF	0.000162719	-0.461199	0.323	0.517	1
MT2A	non-TF	0.000178418	-0.461479	0.427	0.632	1	TRUE
CTGF	non-TF	0.00609089	-0.462289	0.046	0.115	1
PLEKHA5	non-TF	4.52692e-05	-0.462712	0.077	0.207	0.686281
MRPS7	non-TF	0.00099026	-0.462929	0.234	0.379	1
TPBGL	non-TF	1.25588e-18	-0.462955	0.001	0.103	1.90391e-14
DYNC2LI1	non-TF	0.000848553	-0.463076	0.102	0.218	1
CNTNAP2	non-TF	2.72835e-07	-0.463128	0.037	0.161	0.00413618
MB	non-TF	9.38054e-17	-0.463601	0.002	0.103	1.42209e-12
SPAG16	non-TF	0.000747069	-0.463923	0.229	0.379	1
MAD2L1	non-TF	9.69082e-07	-0.464801	0.021	0.115	0.0146913
AASDH	non-TF	3.7928e-05	-0.465214	0.084	0.218	0.574988
ABTB2	non-TF	9.96049e-12	-0.465356	0.007	0.103	1.51001e-07
TRAPPC10	non-TF	5.70723e-05	-0.465519	0.102	0.241	0.865216
RALYL	non-TF	1.08162e-12	-0.466264	0.006	0.103	1.63974e-08
NDUFA7	non-TF	0.00236064	-0.4663	0.05	0.126	1	TRUE
ACTR6	non-TF	0.00250012	-0.467629	0.138	0.253	1
CDK14	non-TF	8.54263e-05	-0.467759	0.047	0.149	1	TRUE
RNF10	non-TF	0.00426308	-0.468706	0.091	0.184	1
XRN2	non-TF	0.00191072	-0.468853	0.161	0.287	1
HIST2H2AC	non-TF	4.26339e-05	-0.468876	0.065	0.184	0.646331
PCM1	non-TF	0.000658003	-0.471038	0.272	0.425	1
DYRK1B	non-TF	2.18531e-09	-0.471294	0.011	0.103	3.31293e-05	TRUE
C6orf120	non-TF	2.32718e-08	-0.47303	0.013	0.103	0.000352801
DESI2	non-TF	0.000110067	-0.47358	0.12	0.264	1
PLD3	non-TF	0.00984737	-0.474312	0.146	0.241	1
FAM189B	non-TF	9.94335e-06	-0.474773	0.031	0.126	0.150741
LCA5L	non-TF	1.27586e-05	-0.475635	0.053	0.172	0.19342
TM9SF3	non-TF	0.00607223	-0.47583	0.26	0.379	1
GPR156	non-TF	1.25588e-18	-0.475969	0.001	0.103	1.90391e-14
PCSK1N	non-TF	0.0002136	-0.476282	0.546	0.747	1
COPS3	non-TF	9.41549e-08	-0.476432	0.066	0.23	0.00142739
ABCA9	non-TF	1.72367e-14	-0.477259	0.006	0.115	2.61308e-10
YWHAQ	non-TF	0.0001385	-0.478783	0.223	0.402	1
MT-ND6	non-TF	3.42406e-05	-0.478982	0.754	0.908	0.519087	TRUE
TTLL7	non-TF	1.16529e-05	-0.480489	0.047	0.161	0.176658
MSANTD1	non-TF	6.75226e-21	-0.481075	0	0.103	1.02364e-16	TRUE
C22orf39	non-TF	0.000731084	-0.481416	0.119	0.241	1
STK32C	non-TF	0.000533327	-0.48148	0.05	0.138	1
CAMTA2	TF	0.00190955	-0.482627	0.042	0.115	1
B9D2	non-TF	2.4258e-05	-0.482791	0.023	0.103	0.367751
ANAPC5	non-TF	0.00192101	-0.483927	0.161	0.287	1
CTNNB1	non-TF	0.00112764	-0.485934	0.171	0.31	1	TRUE
WDR46	non-TF	1.34033e-06	-0.486411	0.04	0.161	0.0203194
UBXN6	non-TF	4.10038e-05	-0.486649	0.07	0.195	0.621617
DTD1	non-TF	0.000271001	-0.48684	0.117	0.253	1
NT5C2	non-TF	0.00557035	-0.487091	0.04	0.103	1	TRUE
ANO10	non-TF	3.20584e-06	-0.488241	0.055	0.184	0.0486005
C17orf97	non-TF	0.00094347	-0.489368	0.145	0.276	1
UFSP2	non-TF	0.00799499	-0.489402	0.141	0.241	1
ABHD14A	non-TF	0.00399132	-0.48965	0.306	0.437	1
NDUFA8	non-TF	0.00482129	-0.490272	0.278	0.402	1	TRUE
AL078639.1	non-TF	2.31254e-10	-0.49081	0.012	0.115	3.50581e-06
SNX3	non-TF	0.00119647	-0.491496	0.37	0.529	1
UBE2E2	non-TF	0.000190826	-0.492158	0.045	0.138	1
TRIP12	non-TF	0.00167433	-0.493057	0.1	0.207	1
SKOR2	non-TF	6.75226e-21	-0.493727	0	0.103	1.02364e-16
PSMD14	non-TF	9.51367e-06	-0.494448	0.254	0.471	0.144227	TRUE
TMC2	non-TF	1.25588e-18	-0.4948	0.001	0.103	1.90391e-14
TMEM219	non-TF	1.6258e-05	-0.495899	0.355	0.586	0.246472
METTL5	non-TF	0.00231296	-0.495919	0.26	0.391	1
ANKFN1	non-TF	6.75226e-21	-0.495964	0	0.103	1.02364e-16	TRUE
MAPK15	non-TF	2.64516e-17	-0.496998	0.007	0.138	4.01006e-13	TRUE
FAM173A	non-TF	0.00401799	-0.497287	0.116	0.218	1
NPHP1	non-TF	0.00896013	-0.497354	0.057	0.126	1
HTT	non-TF	3.9034e-07	-0.497929	0.058	0.207	0.00591756	TRUE
SPART	non-TF	0.000668443	-0.498781	0.145	0.276	1
HAGH	non-TF	0.0010415	-0.498884	0.121	0.241	1
SLC2A6	non-TF	2.91215e-05	-0.498929	0.062	0.184	0.441482
SMC1A	non-TF	0.00580827	-0.500621	0.121	0.218	1
SPRYD7	non-TF	0.000273084	-0.500961	0.097	0.218	1
PLEKHA3	non-TF	0.000717228	-0.501207	0.211	0.356	1
ATP5PO	non-TF	1.91898e-05	-0.502029	0.582	0.816	0.290917
SLC4A1AP	non-TF	9.74232e-05	-0.502962	0.11	0.253	1
PLCE1	non-TF	1.57832e-05	-0.503319	0.1	0.253	0.239273	TRUE
BIRC2	non-TF	4.47724e-05	-0.503478	0.113	0.253	0.678749	TRUE
MAP1B	non-TF	0.00035416	-0.503935	0.456	0.644	1
SUPT16H	non-TF	0.000215536	-0.505441	0.196	0.356	1
DNAJA4	non-TF	6.52434e-11	-0.505835	0.031	0.184	9.8909e-07
MTSS1	non-TF	4.47356e-10	-0.506359	0.015	0.126	6.78191e-06
SERINC1	non-TF	1.79053e-06	-0.506516	0.139	0.333	0.0271444
SPEF1	non-TF	3.09917e-25	-0.506736	0	0.126	4.69834e-21
SLC7A14	non-TF	1.42382e-18	-0.509854	0.001	0.103	2.1585e-14
APOO	non-TF	0.000882729	-0.510098	0.139	0.264	1
REL	TF	3.46242e-07	-0.510107	0.033	0.149	0.00524904
MT-ATP8	non-TF	0.000561476	-0.510803	0.441	0.586	1
ROGDI	non-TF	0.00116969	-0.511241	0.06	0.149	1
KLHDC7B	non-TF	2.60241e-06	-0.511749	0.053	0.184	0.0394526
ACOT7	non-TF	3.66567e-06	-0.512264	0.028	0.126	0.0555716
RNF2	non-TF	4.25443e-06	-0.512712	0.024	0.115	0.0644972
MIA3	non-TF	0.000481044	-0.512971	0.219	0.379	1
ADIPOR1	non-TF	7.73061e-08	-0.513337	0.039	0.172	0.00117196
FBXO15	non-TF	2.83955e-06	-0.513452	0.024	0.115	0.0430476
MAP3K13	non-TF	0.0010571	-0.513795	0.353	0.494	1	TRUE
MORN2	non-TF	0.000125918	-0.51522	0.278	0.46	1
MED24	non-TF	2.3936e-12	-0.51565	0.017	0.149	3.62869e-08
SLC25A33	non-TF	0.00224406	-0.515679	0.094	0.195	1
THOC7	non-TF	0.000605104	-0.517398	0.249	0.402	1
PRKAR1A	non-TF	1.65323e-05	-0.517459	0.266	0.483	0.25063
VPS29	non-TF	0.000147443	-0.517964	0.339	0.517	1
PFDN2	non-TF	0.0022563	-0.519265	0.291	0.425	1
VRK2	non-TF	6.50087e-06	-0.519433	0.034	0.138	0.0985531
HIPK2	non-TF	0.00362517	-0.520314	0.206	0.333	1	TRUE
NDUFB1	non-TF	0.00074976	-0.520548	0.502	0.667	1	TRUE
CCT7	non-TF	0.00265723	-0.520578	0.253	0.379	1
SKAP2	non-TF	2.69971e-08	-0.520851	0.02	0.126	0.000409275
LINC01574	non-TF	8.61844e-19	-0.521135	0.002	0.115	1.30656e-14
MBP	non-TF	3.7331e-10	-0.521151	0.03	0.172	5.65937e-06	TRUE
EMC4	non-TF	6.13769e-05	-0.521656	0.299	0.494	0.930473
DIS3	non-TF	7.30203e-06	-0.521883	0.082	0.23	0.110699
CFAP20	non-TF	8.51949e-06	-0.522393	0.077	0.218	0.129155
DRAM2	non-TF	5.94243e-05	-0.522696	0.04	0.138	0.900873
VPS28	non-TF	8.8162e-05	-0.523372	0.396	0.598	1
RAB11FIP1	non-TF	0.000188458	-0.523581	0.318	0.506	1
ORMDL1	non-TF	0.000769208	-0.524498	0.191	0.333	1
NSD3	non-TF	7.1566e-05	-0.524985	0.181	0.356	1
OSBPL6	non-TF	8.85466e-12	-0.525781	0.009	0.115	1.34237e-07
KIAA0232	non-TF	0.00649616	-0.525877	0.125	0.218	1
XRCC5	non-TF	1.82345e-05	-0.526084	0.441	0.69	0.276435	TRUE
TRAPPC6A	non-TF	0.00020099	-0.526182	0.134	0.276	1
SNAP91	non-TF	4.04851e-15	-0.526418	0.004	0.103	6.13754e-11
HNRNPA3	non-TF	0.000785736	-0.527046	0.34	0.506	1
RHPN1	non-TF	1.11175e-08	-0.527241	0.015	0.115	0.000168541
PPDPF	non-TF	0.0001828	-0.527432	0.573	0.77	1
DAGLA	non-TF	9.03301e-17	-0.528167	0.002	0.103	1.3694e-12	TRUE
NAXE	non-TF	0.00178084	-0.528273	0.244	0.379	1
R3HDM2	non-TF	8.43243e-08	-0.528821	0.16	0.391	0.00127836
CCDC40	non-TF	8.87132e-10	-0.529511	0.013	0.115	1.34489e-05
CDKN2D	non-TF	1.32486e-06	-0.529615	0.042	0.161	0.0200848	TRUE
BEX1	non-TF	0.000722044	-0.530222	0.474	0.667	1
STK16	non-TF	0.000413438	-0.530802	0.07	0.172	1	TRUE
SNAP25	non-TF	8.85612e-21	-0.531798	0.001	0.115	1.34259e-16	TRUE
ZNF318	TF	1.61256e-08	-0.532031	0.032	0.161	0.000244465
MRPS9	non-TF	0.000973874	-0.533725	0.114	0.23	1
RELT	non-TF	1.0029e-09	-0.533993	0.013	0.115	1.52039e-05
TST	non-TF	0.000176237	-0.533996	0.094	0.218	1
LRTOMT	non-TF	4.6117e-08	-0.534574	0.044	0.184	0.000699134
AP001107.9	non-TF	1.51612e-06	-0.535648	0.037	0.149	0.0229843
HMGB2	TF	1.70027e-05	-0.536395	0.089	0.23	0.25776
SARAF	non-TF	4.0146e-05	-0.536901	0.636	0.816	0.608614
TOP2A	non-TF	5.24471e-25	-0.537294	0.001	0.138	7.95098e-21	TRUE
MYCBP2	non-TF	4.9327e-06	-0.538223	0.096	0.253	0.0747797
ATP5F1B	non-TF	4.97726e-05	-0.538381	0.242	0.425	0.754553
NEK5	non-TF	5.52822e-06	-0.538688	0.045	0.161	0.0838078
DGKZ	non-TF	3.18023e-09	-0.540425	0.033	0.172	4.82122e-05
AP3M2	non-TF	3.26587e-07	-0.540598	0.038	0.161	0.00495105
CAPS2	non-TF	1.94565e-06	-0.541043	0.027	0.126	0.029496
CFAP45	non-TF	3.23998e-15	-0.541858	0.004	0.103	4.91181e-11
PAFAH1B3	non-TF	0.00426061	-0.542854	0.173	0.287	1
PANK2	non-TF	0.00405481	-0.542873	0.066	0.149	1
TNRC6A	non-TF	0.00033217	-0.54294	0.164	0.31	1	TRUE
NDUFB7	non-TF	0.000454281	-0.542946	0.577	0.747	1	TRUE
NRDC	non-TF	0.00143396	-0.543311	0.127	0.241	1
LBR	non-TF	5.26151e-10	-0.543726	0.026	0.161	7.97645e-06
MBD2	TF	0.00142094	-0.544322	0.108	0.218	1
ALKBH5	non-TF	0.00584492	-0.546639	0.078	0.161	1
SLC25A37	non-TF	1.96892e-05	-0.54698	0.056	0.172	0.298488
MDGA1	non-TF	2.99642e-10	-0.548349	0.012	0.115	4.54258e-06
FAM184A	non-TF	6.82833e-08	-0.548647	0.018	0.115	0.00103517
IDH3B	non-TF	0.000282182	-0.548727	0.119	0.253	1
STIM2	non-TF	0.00358126	-0.548974	0.107	0.207	1	TRUE
TSPAN13	non-TF	1.36198e-05	-0.549336	0.573	0.77	0.206476
MSC-AS1	non-TF	2.88439e-15	-0.549767	0.014	0.161	4.37273e-11
MT-ND4L	non-TF	1.49911e-06	-0.550395	0.712	0.862	0.0227265	TRUE
AP1G1	non-TF	3.21299e-06	-0.550673	0.072	0.218	0.0487089
PTGES2	non-TF	0.00134919	-0.550912	0.193	0.322	1	TRUE
LSM7	non-TF	2.05671e-05	-0.551167	0.432	0.69	0.311797
FBXW11	non-TF	1.43377e-05	-0.551169	0.117	0.276	0.217359
UBTD1	non-TF	1.0474e-05	-0.55164	0.036	0.138	0.158786
ANXA4	non-TF	0.000326527	-0.552472	0.158	0.299	1
RAB2A	non-TF	3.08644e-06	-0.552917	0.444	0.69	0.0467904
CFAP43	non-TF	1.84137e-13	-0.553631	0.009	0.126	2.79152e-09
EIPR1	non-TF	1.79565e-06	-0.555339	0.053	0.184	0.027222
RAB3A	non-TF	8.6585e-09	-0.555831	0.012	0.103	0.000131263
WWC1	non-TF	0.000120685	-0.556107	0.229	0.402	1
NDUFAB1	non-TF	0.000168887	-0.556302	0.483	0.678	1	TRUE
PRPF8	non-TF	0.00013832	-0.557339	0.122	0.264	1
SLC8A2	non-TF	4.41575e-25	-0.5577	0.001	0.138	6.69427e-21
CCDC65	non-TF	1.11398e-12	-0.558504	0.011	0.126	1.6888e-08
LRCH3	non-TF	0.000134746	-0.559364	0.09	0.218	1
MUM1	non-TF	1.47634e-05	-0.559775	0.173	0.356	0.223813
FHIT	non-TF	1.86387e-05	-0.56024	0.104	0.253	0.282562	TRUE
ARL2BP	non-TF	9.66883e-08	-0.560846	0.097	0.287	0.00146579
NBDY	non-TF	0.00339228	-0.560979	0.293	0.437	1
ILKAP	non-TF	3.30566e-06	-0.561271	0.038	0.149	0.0501137	TRUE
SYT7	non-TF	5.47498e-25	-0.561644	0.001	0.138	8.30007e-21
TMEM232	non-TF	2.99198e-15	-0.561707	0.012	0.149	4.53584e-11
NT5DC3	non-TF	8.8869e-07	-0.563161	0.021	0.115	0.0134725
DNAJB13	non-TF	2.90573e-17	-0.563198	0.004	0.115	4.40509e-13
MRPS6	non-TF	0.000282402	-0.565561	0.217	0.379	1
DPF2	non-TF	0.00831404	-0.567234	0.161	0.264	1
SMARCB1	non-TF	0.000521605	-0.567516	0.196	0.345	1	TRUE
MHENCR	non-TF	4.12496e-05	-0.567989	0.066	0.184	0.625344
SLC39A3	non-TF	6.80727e-07	-0.568971	0.075	0.23	0.0103198
FANK1	non-TF	6.56057e-09	-0.569781	0.026	0.149	9.94583e-05
AL451165.2	non-TF	4.10611e-06	-0.569814	0.117	0.287	0.0622486
ATP6V1D	non-TF	0.000454746	-0.570877	0.241	0.391	1
STN1	non-TF	1.70044e-05	-0.571157	0.088	0.23	0.257786	TRUE
SNRNP27	non-TF	4.41729e-06	-0.571689	0.109	0.276	0.0669661
TM7SF3	non-TF	1.17605e-05	-0.572656	0.079	0.218	0.178289
RXRA	TF	5.07719e-06	-0.572694	0.045	0.161	0.0769702	TRUE
FXR2	non-TF	5.30203e-09	-0.574014	0.026	0.149	8.03788e-05	TRUE
MARCH10	non-TF	3.34035e-06	-0.575012	0.05	0.172	0.0506397
KCP	non-TF	4.66343e-16	-0.575356	0.011	0.149	7.06976e-12
CDH8	non-TF	7.10985e-19	-0.575761	0.002	0.115	1.07785e-14
FBXW7	non-TF	2.49617e-05	-0.578097	0.05	0.161	0.378419	TRUE
ATP6V0A1	non-TF	6.34764e-09	-0.578349	0.081	0.276	9.62302e-05
GLCCI1	non-TF	0.000281227	-0.578469	0.066	0.172	1	TRUE
SKOR1	non-TF	4.02441e-23	-0.581263	0.002	0.138	6.101e-19
RGS22	non-TF	5.47498e-25	-0.581448	0.001	0.138	8.30007e-21
DNAL1	non-TF	7.07535e-08	-0.581478	0.065	0.23	0.00107262
RC3H2	non-TF	5.01213e-12	-0.581909	0.018	0.149	7.59839e-08
LONRF2	non-TF	6.35859e-06	-0.582903	0.076	0.218	0.0963962
SMARCE1	TF	2.72848e-06	-0.583101	0.093	0.253	0.0413638
DNAH9	non-TF	1.28538e-12	-0.583348	0.017	0.149	1.94864e-08
HIRIP3	non-TF	5.07463e-05	-0.583355	0.085	0.218	0.769314
WDR78	non-TF	1.41293e-09	-0.583565	0.017	0.126	2.14201e-05
SEPT6	non-TF	0.000141153	-0.584327	0.116	0.253	1
CCDC157	non-TF	1.55074e-13	-0.584577	0.007	0.115	2.35092e-09
ARF5	non-TF	6.90786e-05	-0.584883	0.121	0.264	1
CACFD1	non-TF	2.30407e-11	-0.585105	0.023	0.161	3.49298e-07
GCNT2	non-TF	3.85234e-17	-0.585167	0.004	0.115	5.84015e-13
UQCC2	non-TF	1.03169e-05	-0.586244	0.362	0.586	0.156404
ZFYVE9	non-TF	3.12051e-07	-0.586292	0.028	0.138	0.00473069
KNCN	non-TF	6.75226e-21	-0.586502	0	0.103	1.02364e-16
PPA1	non-TF	0.0002343	-0.586979	0.154	0.299	1	TRUE
DHRS3	non-TF	0.000198746	-0.587478	0.112	0.241	1
LRBA	non-TF	2.91874e-07	-0.587858	0.038	0.161	0.00442481
DCLRE1A	non-TF	2.15407e-20	-0.588063	0.006	0.149	3.26557e-16
PSMF1	non-TF	8.96919e-05	-0.588641	0.152	0.31	1	TRUE
VSTM2L	non-TF	7.00131e-23	-0.588903	0.001	0.126	1.0614e-18
NTPCR	non-TF	1.5491e-06	-0.58965	0.144	0.333	0.0234843
ATP5IF1	non-TF	1.75095e-05	-0.58983	0.652	0.805	0.265444
FAHD2B	non-TF	0.00131684	-0.590397	0.046	0.126	1
C2orf50	non-TF	9.23893e-21	-0.590707	0.001	0.115	1.40062e-16
MAF1	TF	0.0017613	-0.591054	0.087	0.184	1
TMEM19	non-TF	1.901e-11	-0.59314	0.03	0.184	2.88191e-07
DCBLD1	non-TF	1.03673e-11	-0.593852	0.007	0.103	1.57169e-07	TRUE
EIF4A2	non-TF	2.39242e-06	-0.593904	0.211	0.414	0.0362691
STRAP	non-TF	1.5863e-05	-0.594189	0.18	0.368	0.240483	TRUE
RBFOX2	non-TF	4.70761e-08	-0.594262	0.044	0.184	0.000713674
CFAP52	non-TF	5.00698e-23	-0.594423	0.002	0.138	7.59058e-19
CTBP2	non-TF	8.69307e-08	-0.595126	0.144	0.356	0.00131787
AGPAT2	non-TF	4.20529e-07	-0.59545	0.039	0.161	0.00637522
ENTPD4	non-TF	2.10701e-11	-0.595842	0.023	0.161	3.19423e-07
CTXN1	non-TF	3.84397e-16	-0.596908	0.008	0.138	5.82745e-12
RPL37A	non-TF	8.81841e-09	-0.596954	0.848	0.977	0.000133687
RAD51C	non-TF	5.35607e-05	-0.597083	0.108	0.253	0.81198
INSC	non-TF	2.07967e-27	-0.597117	0	0.138	3.15278e-23
C1orf158	non-TF	2.93221e-27	-0.597157	0.001	0.149	4.44524e-23
GRIPAP1	non-TF	3.82937e-09	-0.597661	0.043	0.195	5.80532e-05
RIPOR2	non-TF	4.08645e-07	-0.598162	0.071	0.23	0.00619506	TRUE
SDSL	non-TF	2.8992e-15	-0.59833	0.007	0.126	4.39519e-11
SNAPC5	non-TF	2.07128e-05	-0.598402	0.07	0.195	0.314006
OPTN	non-TF	0.00177656	-0.599216	0.078	0.172	1
FBXL17	non-TF	2.86429e-10	-0.600796	0.038	0.195	4.34226e-06	TRUE
YIF1A	non-TF	2.85632e-06	-0.602221	0.323	0.552	0.0433018
SNF8	non-TF	4.80238e-05	-0.602996	0.174	0.345	0.728042
NDUFB8	non-TF	1.84492e-07	-0.603051	0.529	0.816	0.0027969	TRUE
HTATSF1	non-TF	4.08739e-07	-0.603056	0.135	0.333	0.00619649
SCAND1	non-TF	6.75627e-06	-0.607052	0.357	0.586	0.102425
C1orf56	non-TF	0.00433621	-0.607427	0.125	0.23	1
PDLIM1	non-TF	3.12963e-07	-0.60816	0.196	0.425	0.00474452
FDFT1	non-TF	1.06567e-05	-0.61002	0.229	0.425	0.161555	TRUE
TMF1	TF	9.8472e-07	-0.610693	0.125	0.31	0.0149284
ZNF688	TF	4.12447e-07	-0.613746	0.093	0.264	0.0062527
TERF2IP	non-TF	1.10174e-06	-0.613933	0.445	0.678	0.0167024
PCSK5	non-TF	6.72422e-21	-0.614868	0.002	0.126	1.01939e-16	TRUE
NEDD1	non-TF	7.68848e-10	-0.61538	0.031	0.172	1.16557e-05
NDUFB5	non-TF	0.00340646	-0.61551	0.234	0.356	1	TRUE
WDTC1	non-TF	1.69374e-05	-0.615807	0.11	0.264	0.25677
DCTN3	non-TF	0.000934834	-0.61676	0.409	0.563	1
MTUS2	non-TF	1.04883e-20	-0.617566	0.001	0.115	1.59003e-16
PDPK1	non-TF	0.0001185	-0.618078	0.083	0.207	1	TRUE
NUDC	non-TF	8.73517e-07	-0.618378	0.425	0.678	0.0132425
SCAMP1	non-TF	1.51628e-08	-0.620521	0.096	0.299	0.000229868
CFAP70	non-TF	7.74607e-09	-0.620982	0.023	0.138	0.00011743
IQUB	non-TF	2.41021e-17	-0.621535	0.019	0.195	3.65387e-13
BOLA3	non-TF	1.8938e-06	-0.621947	0.377	0.621	0.0287101
CLIP1	non-TF	1.28562e-05	-0.623097	0.108	0.264	0.194901
C15orf65	non-TF	1.21116e-07	-0.623183	0.063	0.218	0.00183613
NAT14	non-TF	9.18616e-09	-0.624067	0.04	0.184	0.000139262
ANP32E	non-TF	5.6868e-06	-0.627167	0.291	0.517	0.0862118
TCTEX1D4	non-TF	4.22967e-25	-0.62746	0.001	0.138	6.41218e-21
P4HTM	non-TF	1.97794e-05	-0.628188	0.191	0.368	0.299856	TRUE
MAST2	non-TF	1.21373e-12	-0.631398	0.006	0.103	1.84002e-08
ANKRD66	non-TF	4.51181e-25	-0.631742	0.001	0.138	6.8399e-21
YPEL3	non-TF	9.74971e-07	-0.631832	0.351	0.609	0.0147806
DPCD	non-TF	0.000210054	-0.63185	0.113	0.241	1
NME7	non-TF	3.39364e-07	-0.632475	0.102	0.287	0.00514475
UBE2M	non-TF	2.45073e-07	-0.63306	0.215	0.46	0.00371531
MTX2	non-TF	8.41191e-07	-0.633747	0.082	0.241	0.0127525
SERINC2	non-TF	4.6117e-08	-0.634282	0.044	0.184	0.000699134
CHST10	non-TF	2.39997e-06	-0.635518	0.071	0.218	0.0363836
EFHC2	non-TF	2.93221e-27	-0.636257	0.001	0.149	4.44524e-23
SLC25A26	non-TF	0.0036314	-0.636407	0.138	0.241	1
C7orf50	non-TF	2.44473e-06	-0.637039	0.223	0.437	0.0370621
MT-ND4	non-TF	5.25222e-20	-0.63903	1	1	7.96237e-16	TRUE
RSPH9	non-TF	6.69005e-07	-0.639999	0.051	0.184	0.0101421
SURF1	non-TF	9.25186e-08	-0.640268	0.353	0.632	0.00140258
HMGCS1	non-TF	3.92e-08	-0.640588	0.043	0.184	0.000594272	TRUE
ETNK1	non-TF	2.70981e-11	-0.642404	0.062	0.264	4.10808e-07
STAU2	non-TF	0.000143639	-0.642761	0.051	0.149	1
EPRS	non-TF	2.06796e-06	-0.642789	0.13	0.31	0.0313503
SRCIN1	non-TF	2.76972e-14	-0.642905	0.019	0.172	4.19889e-10
RBM24	non-TF	3.51154e-27	-0.64446	0.002	0.161	5.32349e-23
AHSA1	non-TF	0.0028128	-0.644697	0.172	0.287	1
IVNS1ABP	non-TF	4.7762e-05	-0.645973	0.065	0.184	0.724071
TMEM33	non-TF	6.32703e-05	-0.647227	0.068	0.184	0.959178
HENMT1	non-TF	8.78504e-12	-0.647636	0.025	0.172	1.33181e-07
COX7A2	non-TF	8.08801e-08	-0.648126	0.637	0.862	0.00122614
ENSA	non-TF	1.62709e-05	-0.648861	0.297	0.494	0.246666
SPOCK3	non-TF	1.33246e-31	-0.650561	0.001	0.172	2.02001e-27
TCTN1	non-TF	5.30373e-05	-0.651598	0.135	0.287	0.804046
SEMA3E	non-TF	3.17957e-12	-0.652073	0.052	0.253	4.82023e-08
CCT6A	non-TF	9.73273e-07	-0.652853	0.184	0.391	0.0147548
C9orf135	non-TF	4.66307e-15	-0.653389	0.018	0.172	7.06921e-11
TMED4	non-TF	1.51479e-06	-0.654143	0.292	0.517	0.0229642
UBXN11	non-TF	1.34951e-06	-0.654254	0.059	0.195	0.0204585
CYP26B1	non-TF	5.38509e-11	-0.654455	0.027	0.172	8.16379e-07	TRUE
NDUFV2	non-TF	1.64236e-06	-0.655396	0.474	0.701	0.0248982	TRUE
CCDC107	non-TF	2.66026e-07	-0.656107	0.158	0.368	0.00403295
SNX2	non-TF	0.000100196	-0.656349	0.241	0.414	1
NDUFS4	non-TF	2.66931e-05	-0.65638	0.217	0.402	0.404668	TRUE
ATG9B	non-TF	2.99646e-27	-0.656611	0.001	0.149	4.54264e-23
PDXDC1	non-TF	1.23964e-05	-0.656776	0.139	0.31	0.18793
KIF5B	non-TF	8.09589e-07	-0.657247	0.358	0.609	0.0122734
MRPS36	non-TF	0.000129211	-0.657731	0.196	0.356	1
CBFA2T2	non-TF	1.2353e-07	-0.658583	0.046	0.184	0.00187271
RFXANK	TF	6.21172e-08	-0.659079	0.09	0.276	0.000941697
NME1	non-TF	0.000111957	-0.659226	0.208	0.368	1	TRUE
DUSP15	non-TF	1.61483e-22	-0.659542	0.006	0.161	2.44808e-18
DNAL4	non-TF	3.24451e-08	-0.660739	0.038	0.172	0.000491867
NRIP1	non-TF	4.89766e-12	-0.661913	0.044	0.23	7.42485e-08	TRUE
MAPRE3	non-TF	3.45735e-09	-0.663009	0.058	0.23	5.24134e-05
SPACA9	non-TF	4.27908e-05	-0.663048	0.093	0.23	0.648708
TLE3	non-TF	1.63815e-08	-0.663961	0.062	0.23	0.000248343	TRUE
SUGP2	non-TF	2.05451e-06	-0.665605	0.106	0.276	0.0311464
MTPN	non-TF	1.53478e-06	-0.665936	0.47	0.713	0.0232673
TM9SF2	non-TF	1.79588e-07	-0.667394	0.17	0.391	0.00272256
SLC39A8	non-TF	2.42056e-23	-0.667499	0.004	0.149	3.66957e-19	TRUE
AKR1A1	non-TF	2.89491e-07	-0.6678	0.699	0.874	0.00438869	TRUE
CYB561D2	non-TF	7.00773e-06	-0.668241	0.114	0.276	0.106237
HINT2	non-TF	1.13327e-06	-0.668851	0.348	0.586	0.0171803
AFTPH	non-TF	2.64318e-09	-0.669736	0.069	0.253	4.00705e-05
NARF	non-TF	3.04004e-05	-0.670126	0.101	0.241	0.46087
UBAC1	non-TF	0.000567351	-0.670406	0.173	0.31	1
JHY	non-TF	9.17897e-13	-0.67179	0.026	0.184	1.39153e-08
SPAG6	non-TF	1.38539e-29	-0.672182	0	0.149	2.10024e-25
TRNP1	non-TF	6.20925e-08	-0.67291	0.066	0.23	0.000941322
BHMT2	non-TF	9.55922e-17	-0.674729	0.002	0.103	1.44918e-12	TRUE
KIF3A	non-TF	4.90144e-05	-0.674751	0.101	0.241	0.743058
UCHL3	non-TF	1.74855e-08	-0.675072	0.068	0.241	0.000265081	TRUE
CCT5	non-TF	1.62095e-05	-0.676084	0.144	0.31	0.245735
RUVBL1	non-TF	1.05701e-05	-0.677382	0.071	0.207	0.160242
NAP1L3	non-TF	2.57503e-08	-0.678258	0.043	0.184	0.000390375
NEFM	non-TF	1.92385e-29	-0.678283	0.001	0.161	2.91655e-25
SECISBP2	non-TF	0.00288509	-0.679581	0.133	0.241	1
TXLNB	non-TF	3.59834e-12	-0.681723	0.039	0.218	5.45509e-08
ATOX1	non-TF	4.60239e-06	-0.683282	0.484	0.713	0.0697722
RIBC1	non-TF	1.39575e-17	-0.683422	0.021	0.207	2.11596e-13
TMEM206	non-TF	5.59345e-18	-0.684971	0.015	0.184	8.47967e-14
SAMM50	non-TF	7.01014e-08	-0.685912	0.1	0.287	0.00106274
DLG1	non-TF	7.86931e-07	-0.68595	0.063	0.207	0.0119299
NDUFA6	non-TF	0.000236842	-0.686685	0.372	0.54	1	TRUE
ENPP4	non-TF	2.66931e-08	-0.687129	0.07	0.241	0.000404667
KCNA5	non-TF	1.38539e-29	-0.687175	0	0.149	2.10024e-25	TRUE
SLC38A8	non-TF	3.0689e-19	-0.687315	0.004	0.126	4.65246e-15
ANKRD39	non-TF	0.000152365	-0.688077	0.081	0.195	1
H3F3B	non-TF	9.43504e-17	-0.688484	0.985	0.989	1.43035e-12
POPDC3	non-TF	1.38539e-29	-0.689475	0	0.149	2.10024e-25
POLR3K	non-TF	1.9797e-05	-0.689835	0.135	0.299	0.300123
SEMA6B	non-TF	8.82488e-19	-0.689881	0.012	0.172	1.33785e-14
TIMM17B	non-TF	3.87409e-06	-0.69069	0.174	0.356	0.0587312
HAX1	non-TF	3.29817e-06	-0.691541	0.273	0.494	0.0500003
TXNRD1	non-TF	1.7117e-09	-0.691951	0.057	0.23	2.59494e-05	TRUE
KLHL4	non-TF	3.85121e-27	-0.692261	0.007	0.195	5.83844e-23
GOLGA4	non-TF	9.62517e-08	-0.692623	0.157	0.379	0.00145918
REEP2	non-TF	3.29645e-06	-0.692625	0.082	0.23	0.0499741
IQCD	non-TF	1.42645e-12	-0.693727	0.017	0.149	2.1625e-08
RBFOX3	non-TF	1.38539e-29	-0.694303	0	0.149	2.10024e-25
RPL41	non-TF	7.55443e-24	-0.695388	0.989	1	1.14525e-19
C19orf38	non-TF	4.18693e-17	-0.695498	0.009	0.149	6.34738e-13
MZF1-AS1	non-TF	1.5523e-06	-0.696078	0.049	0.172	0.0235329
COX8A	non-TF	7.08331e-10	-0.696466	0.652	0.885	1.07383e-05
ADGB	non-TF	9.1569e-32	-0.698433	0	0.161	1.38819e-27
NDUFB9	non-TF	7.16279e-05	-0.698677	0.395	0.575	1	TRUE
SH2D4B	non-TF	1.92216e-29	-0.69951	0.002	0.172	2.91399e-25
GON7	non-TF	4.85254e-13	-0.70013	0.05	0.253	7.35645e-09
CLTB	non-TF	4.48472e-07	-0.702066	0.249	0.483	0.00679883
HLA-E	non-TF	1.63392e-06	-0.702359	0.344	0.586	0.0247703	TRUE
CABP1	non-TF	2.86933e-27	-0.702616	0.001	0.149	4.34991e-23
SENP5	non-TF	5.43971e-10	-0.702839	0.087	0.299	8.2466e-06
NDUFA2	non-TF	2.71351e-07	-0.703053	0.47	0.724	0.00411368	TRUE
FMC1	non-TF	2.67982e-05	-0.707483	0.314	0.517	0.406261
PTS	non-TF	0.000202502	-0.707782	0.147	0.287	1
PSIP1	non-TF	1.06588e-07	-0.70962	0.31	0.575	0.00161587	TRUE
NEK11	non-TF	1.07277e-13	-0.711381	0.024	0.184	1.62631e-09	TRUE
MRPL14	non-TF	7.68802e-06	-0.711514	0.269	0.483	0.11655
TMEM165	non-TF	8.54913e-06	-0.712431	0.222	0.425	0.129605
KLHL8	non-TF	3.76732e-16	-0.712489	0.013	0.161	5.71126e-12
IK	non-TF	4.84217e-09	-0.712807	0.266	0.552	7.34073e-05
HMGCR	non-TF	4.1155e-15	-0.714299	0.024	0.195	6.2391e-11	TRUE
CAMK2G	non-TF	1.60469e-08	-0.714645	0.052	0.207	0.000243271	TRUE
PRKRA	non-TF	3.46931e-08	-0.715607	0.077	0.253	0.000525948
AMPH	non-TF	2.93221e-27	-0.717467	0.001	0.149	4.44524e-23
PPID	non-TF	3.85961e-12	-0.718262	0.066	0.287	5.85116e-08	TRUE
C5orf24	non-TF	3.61539e-07	-0.718655	0.072	0.23	0.00548093
ENKUR	non-TF	2.17111e-26	-0.719861	0.006	0.184	3.29141e-22
SYNE4	non-TF	7.02893e-07	-0.721609	0.089	0.253	0.0106559
SPAG1	non-TF	9.40061e-07	-0.722071	0.112	0.287	0.0142513
CHCHD10	non-TF	4.99858e-05	-0.724076	0.122	0.264	0.757784
PLSCR5	non-TF	1.38539e-29	-0.724121	0	0.149	2.10024e-25
CDR1	non-TF	1.30256e-18	-0.725063	0.009	0.161	1.97468e-14
STRBP	non-TF	2.17203e-06	-0.726578	0.227	0.437	0.0329279
COX6C	non-TF	6.51539e-08	-0.727588	0.638	0.92	0.000987733
MT-ND5	non-TF	4.53627e-16	-0.729522	0.972	0.989	6.87698e-12	TRUE
ARF3	non-TF	1.15347e-05	-0.730464	0.127	0.287	0.174866
RBPMS2	non-TF	7.10985e-19	-0.731022	0.002	0.115	1.07785e-14
SPATA17	non-TF	3.82144e-22	-0.731765	0.014	0.207	5.7933e-18
MZT2A	non-TF	0.000203747	-0.731819	0.236	0.391	1
CATIP	non-TF	3.24038e-12	-0.732909	0.014	0.138	4.91242e-08
COX5A	non-TF	5.20211e-06	-0.732915	0.463	0.667	0.078864
MFHAS1	non-TF	1.38539e-29	-0.732981	0	0.149	2.10024e-25
PGP	non-TF	1.30485e-06	-0.73329	0.302	0.529	0.0197815	TRUE
CHD1L	non-TF	0.00282288	-0.733999	0.05	0.126	1
TSPAN5	non-TF	1.52237e-16	-0.734024	0.006	0.126	2.30791e-12	TRUE
CARHSP1	TF	6.83776e-08	-0.736905	0.093	0.276	0.0010366
VPS35	non-TF	7.31099e-06	-0.738077	0.198	0.391	0.110835	TRUE
LRRC46	non-TF	4.45517e-20	-0.738926	0.008	0.161	6.75404e-16
HPCAL1	non-TF	3.28978e-18	-0.74096	0.018	0.195	4.9873e-14
ARHGAP18	non-TF	9.13153e-20	-0.743856	0.005	0.138	1.38434e-15
H1F0	non-TF	0.000533109	-0.745431	0.158	0.287	1
DYDC2	non-TF	4.22967e-25	-0.745434	0.001	0.138	6.41218e-21
LINC02568	non-TF	3.09917e-25	-0.747246	0	0.126	4.69834e-21
DDX1	non-TF	1.58281e-06	-0.747749	0.222	0.437	0.0239954
AC087164.1	non-TF	2.2464e-27	-0.748812	0.002	0.161	3.40554e-23
TMEM80	non-TF	1.53866e-06	-0.750137	0.104	0.276	0.0233261
UBE2E3	non-TF	4.71698e-05	-0.751838	0.206	0.379	0.715094
HNRNPF	non-TF	8.40153e-05	-0.752679	0.141	0.287	1
GPI	non-TF	2.63639e-06	-0.753576	0.096	0.253	0.0399677	TRUE
SMYD2	non-TF	5.15866e-07	-0.755142	0.163	0.368	0.00782052	TRUE
PDZD7	non-TF	5.4715e-14	-0.755338	0.038	0.23	8.2948e-10
ADGRV1	non-TF	8.14252e-19	-0.755761	0.012	0.172	1.23441e-14	TRUE
CDH18	non-TF	9.1569e-32	-0.756205	0	0.161	1.38819e-27
HEBP2	non-TF	2.04375e-09	-0.758663	0.471	0.77	3.09832e-05
SCCPDH	non-TF	1.82468e-06	-0.762929	0.125	0.299	0.0276621
ELOVL4	non-TF	7.23128e-14	-0.765093	0.02	0.172	1.09626e-09
MPST	non-TF	1.63919e-06	-0.765787	0.087	0.241	0.0248502	TRUE
ODF3B	non-TF	1.1544e-18	-0.765878	0.02	0.207	1.75007e-14
CEP85L	non-TF	2.04426e-23	-0.766488	0.011	0.195	3.0991e-19
TNC	non-TF	4.62488e-23	-0.76794	0.002	0.138	7.01131e-19	TRUE
SYDE2	non-TF	3.25567e-17	-0.770453	0.028	0.23	4.9356e-13
EEF1A2	non-TF	4.58783e-23	-0.770856	0	0.115	6.95514e-19
PALM3	non-TF	9.1569e-32	-0.77097	0	0.161	1.38819e-27
CCDC33	non-TF	3.9014e-36	-0.771058	0	0.184	5.91453e-32
REC8	non-TF	9.43135e-15	-0.7731	0.025	0.195	1.42979e-10
B4GAT1	non-TF	7.17901e-06	-0.773868	0.085	0.23	0.108834
OSCP1	non-TF	5.88333e-10	-0.774289	0.095	0.31	8.91912e-06
SLC27A3	non-TF	1.51185e-13	-0.77662	0.018	0.161	2.29196e-09
PODXL2	non-TF	4.55471e-13	-0.776877	0.05	0.253	6.90493e-09
UQCR11	non-TF	1.29533e-10	-0.777385	0.629	0.908	1.96372e-06
NRAV	non-TF	2.24945e-18	-0.777426	0.02	0.207	3.41016e-14
MT-CYB	non-TF	1.24772e-23	-0.777682	0.996	1	1.89154e-19
ATP6V1A	non-TF	1.72207e-08	-0.778386	0.087	0.276	0.000261066
ARL5A	non-TF	1.25809e-08	-0.779196	0.062	0.23	0.000190726
PRDX2	non-TF	3.49193e-12	-0.779986	0.771	0.954	5.29376e-08
EFCAB2	non-TF	5.37039e-06	-0.782964	0.058	0.184	0.0814151
PNMA8C	non-TF	2.9036e-13	-0.786128	0.021	0.172	4.40186e-09
EMC6	non-TF	2.37806e-07	-0.786645	0.107	0.287	0.00360515
IQGAP2	non-TF	5.88372e-14	-0.787059	0.017	0.161	8.91972e-10
TNFAIP8L1	non-TF	7.85718e-30	-0.789353	0.008	0.218	1.19115e-25
PLEKHO1	non-TF	5.12324e-14	-0.790427	0.02	0.172	7.76683e-10
EIF1B	non-TF	1.18654e-08	-0.791525	0.314	0.586	0.000179879
LRRC23	non-TF	3.56029e-07	-0.792689	0.13	0.322	0.00539739
DTNA	non-TF	9.52936e-14	-0.793037	0.031	0.207	1.44465e-09
FEZ1	non-TF	8.55046e-13	-0.795944	0.062	0.276	1.29625e-08
TTLL10	non-TF	9.56563e-25	-0.796288	0.009	0.195	1.45015e-20
NDFIP1	non-TF	1.15404e-06	-0.797909	0.412	0.609	0.0174952
DYNC1LI1	non-TF	1.5926e-07	-0.798437	0.145	0.356	0.00241437
VBP1	non-TF	1.17408e-06	-0.798552	0.179	0.379	0.017799
MIF4GD	non-TF	4.5838e-08	-0.800025	0.091	0.276	0.000694904
WIF1	non-TF	1.1631e-33	-0.801831	0.001	0.184	1.76326e-29	TRUE
HSPA8	non-TF	7.6636e-05	-0.802013	0.444	0.644	1	TRUE
MT-ND1	non-TF	9.3832e-21	-0.803331	0.977	1	1.42249e-16	TRUE
IFT88	non-TF	1.14884e-11	-0.805055	0.112	0.368	1.74164e-07
LSAMP	non-TF	1.11417e-07	-0.80806	0.075	0.241	0.00168908
AC005921.2	non-TF	1.58993e-06	-0.808988	0.059	0.195	0.0241033
DNAJB6	non-TF	9.78223e-08	-0.809289	0.326	0.586	0.00148299
PPP1R42	non-TF	2.04468e-21	-0.809879	0.015	0.207	3.09974e-17
ASNS	non-TF	4.20809e-12	-0.815021	0.039	0.218	6.37946e-08	TRUE
ARMC4	non-TF	9.1569e-32	-0.816826	0	0.161	1.38819e-27
PHACTR2	non-TF	4.05518e-10	-0.816992	0.039	0.195	6.14765e-06
CXXC5	non-TF	0.000173466	-0.817666	0.128	0.264	1
C20orf96	non-TF	6.73344e-15	-0.821565	0.036	0.23	1.02079e-10
CAST	non-TF	6.32893e-09	-0.82166	0.261	0.54	9.59465e-05	TRUE
B3GNT10	non-TF	1.48151e-28	-0.830532	0.006	0.195	2.24597e-24
ENO2	non-TF	4.79001e-10	-0.831875	0.087	0.299	7.26166e-06	TRUE
MAP2	non-TF	3.00549e-15	-0.831887	0.038	0.241	4.55632e-11	TRUE
CMSS1	non-TF	2.53728e-07	-0.837441	0.091	0.264	0.00384652
MGST3	non-TF	1.30343e-07	-0.837996	0.295	0.529	0.00197599
CXXC4	non-TF	8.10214e-19	-0.83909	0.028	0.241	1.22828e-14	TRUE
USP33	non-TF	3.49606e-11	-0.840897	0.069	0.276	5.30003e-07
UGCG	non-TF	4.85938e-18	-0.841363	0.027	0.23	7.36681e-14	TRUE
SVBP	non-TF	8.21391e-12	-0.844587	0.18	0.471	1.24523e-07
FAM229B	non-TF	2.76545e-12	-0.845099	0.155	0.448	4.19243e-08
G3BP2	non-TF	1.10061e-09	-0.848605	0.14	0.379	1.66853e-05
CACHD1	non-TF	2.80707e-22	-0.850813	0.014	0.207	4.25552e-18
KIF18A	non-TF	1.60441e-40	-0.851984	0	0.207	2.43229e-36
ADPRHL1	non-TF	6.22885e-28	-0.852607	0.008	0.207	9.44293e-24
PCDH7	non-TF	3.35868e-25	-0.856581	0.002	0.149	5.09176e-21
FGF13	non-TF	2.93221e-27	-0.856817	0.001	0.149	4.44524e-23
MAPK12	non-TF	7.68021e-22	-0.857531	0.008	0.172	1.16432e-17	TRUE
GALNT18	non-TF	2.5133e-38	-0.85852	0	0.195	3.81017e-34	TRUE
DHCR7	non-TF	5.30797e-06	-0.862965	0.159	0.333	0.0804689	TRUE
DGCR6L	non-TF	1.55843e-08	-0.864736	0.136	0.356	0.000236257
INTU	non-TF	1.12658e-09	-0.866634	0.172	0.425	1.7079e-05
LRRC53	non-TF	2.20435e-40	-0.866777	0.001	0.218	3.34179e-36
NUP214	non-TF	2.01571e-09	-0.868584	0.064	0.241	3.05581e-05
NDUFV3	non-TF	2.58013e-06	-0.869019	0.235	0.437	0.0391148	TRUE
FADS2	non-TF	7.2494e-22	-0.871221	0.023	0.241	1.09901e-17
CLTA	non-TF	1.14941e-09	-0.872086	0.543	0.816	1.74251e-05
PSMB5	non-TF	1.21291e-10	-0.87212	0.421	0.713	1.83877e-06	TRUE
SCGB3A2	non-TF	9.1569e-32	-0.874905	0	0.161	1.38819e-27
PPM1J	non-TF	5.50431e-10	-0.875889	0.045	0.207	8.34453e-06
CALCOCO2	non-TF	4.40956e-09	-0.876355	0.116	0.333	6.68489e-05
WDR60	non-TF	9.23393e-08	-0.878831	0.127	0.322	0.00139986
REEP3	non-TF	4.95472e-11	-0.883485	0.081	0.299	7.51135e-07
CAPSL	non-TF	1.34367e-10	-0.888397	0.057	0.241	2.03701e-06
CASC1	non-TF	7.49946e-28	-0.89142	0.014	0.241	1.13692e-23
TMEM215	non-TF	1.38539e-29	-0.891712	0	0.149	2.10024e-25
NPTN	non-TF	4.81326e-11	-0.893007	0.07	0.276	7.29691e-07	TRUE
CCDC96	non-TF	1.3761e-22	-0.893695	0.012	0.195	2.08616e-18
RARB	TF	1.09779e-23	-0.897587	0.023	0.253	1.66425e-19	TRUE
PPIL6	non-TF	1.97227e-16	-0.898713	0.031	0.23	2.98997e-12
LRRC73	non-TF	2.29101e-31	-0.899667	0.007	0.218	3.47317e-27
KRT10	non-TF	4.4388e-10	-0.902205	0.501	0.782	6.72922e-06	TRUE
MSRB3	non-TF	1.69495e-16	-0.902749	0.066	0.333	2.56955e-12
EFHC1	non-TF	6.58396e-25	-0.908092	0.028	0.287	9.98129e-21
TMC1	non-TF	5.54785e-34	-0.911151	0.004	0.207	8.41054e-30
CFAP36	non-TF	1.72137e-08	-0.914345	0.227	0.471	0.00026096
CA12	non-TF	9.86337e-32	-0.921044	0.002	0.184	1.49529e-27	TRUE
ADAM12	non-TF	9.41577e-12	-0.921851	0.042	0.218	1.42743e-07	TRUE
EVI5	non-TF	5.05864e-11	-0.925561	0.094	0.322	7.66889e-07
RABL2B	non-TF	1.13478e-19	-0.926947	0.024	0.23	1.72033e-15
FGGY	non-TF	1.82491e-17	-0.927889	0.051	0.299	2.76657e-13
ANAPC16	non-TF	3.01785e-15	-0.928585	0.418	0.816	4.57506e-11
PITPNA	non-TF	2.71059e-12	-0.929371	0.087	0.322	4.10926e-08
C22orf42	non-TF	1.60441e-40	-0.930995	0	0.207	2.43229e-36
HDLBP	non-TF	3.20944e-08	-0.931512	0.192	0.425	0.000486551
RFC2	non-TF	3.01962e-15	-0.931905	0.046	0.264	4.57775e-11
LRRC6	non-TF	5.80178e-13	-0.932243	0.033	0.207	8.7955e-09
NLRP1	non-TF	3.45266e-07	-0.933077	0.288	0.506	0.00523424	TRUE
NDUFC2	non-TF	1.18039e-13	-0.939994	0.651	0.931	1.78947e-09	TRUE
TMPRSS3	non-TF	2.47508e-17	-0.941696	0.043	0.276	3.75223e-13
MLF2	non-TF	2.05192e-07	-0.945197	0.216	0.448	0.00311071
IER3IP1	non-TF	3.94593e-11	-0.946307	0.113	0.356	5.98203e-07
TCTEX1D2	non-TF	3.19911e-11	-0.94653	0.254	0.552	4.84985e-07
CFAP298	non-TF	6.26876e-08	-0.948087	0.259	0.494	0.000950344
TEX9	non-TF	1.25649e-16	-0.948963	0.068	0.333	1.90484e-12
NME5	non-TF	8.6505e-13	-0.950682	0.106	0.368	1.31142e-08
RRN3	non-TF	4.72631e-11	-0.95111	0.032	0.184	7.16509e-07
LIN7B	non-TF	2.95424e-17	-0.954138	0.044	0.276	4.47862e-13
HIST1H1C	non-TF	3.35265e-06	-0.962973	0.127	0.299	0.0508262
ACSL4	non-TF	4.68155e-11	-0.964895	0.082	0.299	7.09723e-07
UQCR10	non-TF	2.66808e-15	-0.971325	0.632	0.92	4.04481e-11	TRUE
NDUFB2	non-TF	9.65774e-17	-0.974972	0.739	0.989	1.46411e-12	TRUE
ZNF397	TF	1.99443e-14	-0.980647	0.094	0.368	3.02355e-10
KIAA1211L	non-TF	1.30811e-27	-0.983433	0.019	0.264	1.9831e-23
KCNAB1	non-TF	1.55423e-23	-0.98537	0.013	0.207	2.35621e-19
H2AFZ	non-TF	3.3352e-12	-0.985621	0.48	0.816	5.05617e-08
CLCN3	non-TF	1.74317e-14	-0.986662	0.101	0.379	2.64264e-10	TRUE
CCDC81	non-TF	7.60224e-47	-0.986852	0.002	0.264	1.1525e-42
HYDIN	non-TF	3.88247e-33	-0.987722	0.011	0.253	5.88582e-29
PTRHD1	non-TF	9.69317e-14	-0.988724	0.141	0.437	1.46949e-09
JUND	TF	2.84059e-13	-0.991095	0.573	0.874	4.30634e-09	TRUE
ALDH1A3	non-TF	1.06273e-14	-0.992907	0.015	0.161	1.61109e-10
LHX3	TF	5.27193e-47	-0.995608	0.001	0.253	7.99225e-43
PSMD1	non-TF	1.44004e-11	-0.998052	0.136	0.402	2.18311e-07	TRUE
CFAP46	non-TF	2.56283e-35	-1.00279	0.007	0.241	3.88524e-31
SMAP2	non-TF	2.66044e-19	-1.00302	0.046	0.299	4.03322e-15
STRIP2	non-TF	3.42e-27	-1.00481	0.007	0.195	5.18471e-23
COX14	non-TF	3.807e-10	-1.00623	0.343	0.632	5.77142e-06
CCDC85B	non-TF	2.73463e-06	-1.00633	0.257	0.46	0.041457
NAA38	non-TF	3.38282e-10	-1.01079	0.439	0.736	5.12835e-06
GCC2	non-TF	4.48857e-12	-1.01165	0.19	0.483	6.80467e-08
FHAD1	non-TF	1.76317e-23	-1.01259	0.011	0.195	2.67297e-19
WDR63	non-TF	6.41926e-34	-1.01443	0.008	0.241	9.7316e-30
ZSCAN18	TF	2.01238e-10	-1.01708	0.179	0.448	3.05077e-06
WDR54	non-TF	8.736e-10	-1.01738	0.121	0.345	1.32438e-05
TWF2	non-TF	1.88562e-19	-1.01798	0.063	0.345	2.8586e-15
RIBC2	non-TF	1.60441e-40	-1.02001	0	0.207	2.43229e-36
CCDC114	non-TF	1.38316e-42	-1.02027	0.001	0.23	2.09686e-38
GRXCR2	non-TF	3.12187e-38	-1.02306	0.002	0.218	4.73275e-34
PKIG	non-TF	2.63935e-10	-1.02462	0.253	0.54	4.00125e-06
QDPR	non-TF	1.59369e-10	-1.02707	0.227	0.506	2.41603e-06
CEP126	non-TF	5.06471e-10	-1.02727	0.05	0.218	7.67811e-06
RPGR	non-TF	2.51892e-22	-1.02987	0.025	0.253	3.81869e-18
ZDHHC16	non-TF	8.2251e-19	-1.03003	0.036	0.264	1.24693e-14
NIN	non-TF	2.12535e-16	-1.03337	0.043	0.264	3.22203e-12
TTC14	non-TF	1.03683e-16	-1.03548	0.076	0.356	1.57184e-12
CHRNA9	non-TF	2.42359e-49	-1.03789	0	0.253	3.67416e-45	TRUE
SULT1C4	non-TF	8.33543e-22	-1.03904	0.02	0.23	1.26365e-17	TRUE
DRC3	non-TF	4.27672e-23	-1.04102	0.024	0.253	6.4835e-19
MYO3B	non-TF	3.64081e-29	-1.04627	0.025	0.299	5.51947e-25
GLS	non-TF	1.72743e-19	-1.04639	0.031	0.253	2.61879e-15	TRUE
COQ4	non-TF	2.18062e-12	-1.04663	0.211	0.529	3.30582e-08
LMO1	non-TF	5.70181e-29	-1.04682	0.018	0.264	8.64394e-25
FSIP1	non-TF	5.00141e-35	-1.0488	0.011	0.264	7.58214e-31	TRUE
PPP1CB	non-TF	7.12713e-09	-1.04933	0.198	0.448	0.000108047
TMEM59L	non-TF	3.56311e-37	-1.04947	0.006	0.241	5.40167e-33
VPS13D	non-TF	7.36573e-16	-1.05053	0.049	0.276	1.11664e-11
RPL7A	non-TF	3.45561e-24	-1.05238	0.893	0.989	5.2387e-20
PTPRZ1	non-TF	5.39306e-11	-1.054	0.498	0.77	8.17588e-07	TRUE
GABRB3	non-TF	1.51339e-42	-1.05786	0.002	0.241	2.29431e-38	TRUE
NDN	non-TF	2.83811e-14	-1.05797	0.096	0.368	4.30257e-10
KIAA2013	non-TF	2.57605e-10	-1.06166	0.121	0.356	3.90528e-06
CYLD	non-TF	1.15818e-19	-1.06295	0.064	0.356	1.7558e-15
DNPH1	non-TF	1.29967e-13	-1.06382	0.289	0.632	1.97029e-09
TFDP2	TF	3.99857e-10	-1.06442	0.154	0.402	6.06183e-06
HSPH1	non-TF	8.21593e-18	-1.06569	0.055	0.31	1.24554e-13
ARMC3	non-TF	1.17032e-53	-1.07404	0.001	0.287	1.77421e-49
PRKCD	non-TF	1.4654e-14	-1.07573	0.089	0.356	2.22154e-10	TRUE
NDUFA4	non-TF	4.26213e-22	-1.07702	0.84	1	6.46138e-18	TRUE
APP	non-TF	3.4813e-12	-1.0811	0.206	0.506	5.27765e-08	TRUE
IFT74	non-TF	2.39554e-12	-1.08152	0.1	0.345	3.63164e-08
EFCAB10	non-TF	1.92445e-51	-1.08795	0.001	0.276	2.91746e-47
EVL	non-TF	1.52357e-19	-1.09123	0.081	0.391	2.30973e-15
FSD1L	non-TF	1.15088e-19	-1.09242	0.07	0.368	1.74473e-15
PIFO	non-TF	8.90527e-19	-1.09525	0.076	0.368	1.35004e-14
RGS12	non-TF	4.98798e-24	-1.09664	0.027	0.276	7.56178e-20	TRUE
TESC	non-TF	2.20435e-40	-1.09674	0.001	0.218	3.34179e-36
SAMD15	non-TF	9.04589e-18	-1.10288	0.047	0.287	1.37136e-13
MT-ND2	non-TF	8.24613e-29	-1.10688	0.991	0.989	1.25011e-24	TRUE
YBX1	TF	3.35226e-14	-1.1155	0.241	0.598	5.08202e-10
PACRG	non-TF	1.34375e-29	-1.11594	0.021	0.287	2.03712e-25
SLK	non-TF	1.25419e-20	-1.11638	0.09	0.425	1.90135e-16	TRUE
MLF1	non-TF	7.5187e-13	-1.11726	0.128	0.402	1.13984e-08
ZNF385A	TF	3.91667e-27	-1.11747	0.026	0.287	5.93767e-23
TCERG1	non-TF	2.10546e-24	-1.11776	0.037	0.31	3.19188e-20
MPDZ	non-TF	6.2342e-15	-1.11901	0.112	0.402	9.45105e-11
DNM1	non-TF	7.18787e-32	-1.11981	0.019	0.287	1.08968e-27
AAK1	non-TF	1.67103e-14	-1.12031	0.261	0.609	2.53328e-10	TRUE
CFAP77	non-TF	5.17869e-49	-1.12075	0.002	0.276	7.85089e-45
ERO1B	non-TF	2.98346e-27	-1.12102	0.05	0.379	4.52292e-23
MRPL57	non-TF	1.59582e-15	-1.1223	0.427	0.782	2.41927e-11
OSBPL1A	non-TF	2.76968e-11	-1.12491	0.302	0.598	4.19884e-07
PLS1	non-TF	4.20931e-15	-1.12601	0.255	0.621	6.38131e-11
AHI1	non-TF	2.11985e-16	-1.12694	0.161	0.506	3.21369e-12
C4orf47	non-TF	3.1048e-36	-1.13776	0.018	0.31	4.70688e-32
KIAA1024L	non-TF	4.21648e-43	-1.14051	0.005	0.264	6.39218e-39
CCDC113	non-TF	2.95151e-18	-1.14151	0.068	0.345	4.47449e-14
DNALI1	non-TF	2.8861e-14	-1.14977	0.046	0.253	4.37533e-10
ANKRD37	non-TF	3.66226e-17	-1.15101	0.058	0.31	5.55199e-13
SPA17	non-TF	5.60703e-15	-1.15253	0.053	0.276	8.50026e-11
ATP6V0B	non-TF	2.50964e-17	-1.1528	0.49	0.862	3.80462e-13
SPEF2	non-TF	3.00578e-23	-1.15294	0.046	0.333	4.55676e-19
IDI1	non-TF	2.81056e-13	-1.15939	0.146	0.437	4.26081e-09	TRUE
KIF21A	non-TF	6.86451e-14	-1.16034	0.165	0.471	1.04066e-09
CRABP1	non-TF	7.43971e-47	-1.16595	0.002	0.264	1.12786e-42
LRTM2	non-TF	3.87385e-34	-1.16921	0.004	0.207	5.87275e-30
MAP1LC3A	non-TF	2.28208e-15	-1.17195	0.13	0.437	3.45963e-11
BTG2	non-TF	1.45778e-08	-1.17364	0.293	0.54	0.000221
FAM174A	non-TF	3.9316e-23	-1.17851	0.062	0.379	5.9603e-19
CCT2	non-TF	2.5315e-15	-1.17864	0.136	0.448	3.83776e-11
CCDC150	non-TF	4.7232e-47	-1.18252	0.002	0.264	7.16037e-43
OSBP	non-TF	6.67326e-26	-1.1861	0.063	0.402	1.01167e-21
C5orf38	non-TF	6.65349e-17	-1.18779	0.051	0.287	1.00867e-12
CCDC170	non-TF	1.47448e-51	-1.18868	0	0.264	2.23532e-47
APBA1	non-TF	1.69976e-37	-1.197	0.007	0.253	2.57684e-33	TRUE
MLLT1	non-TF	7.18243e-24	-1.1972	0.07	0.402	1.08886e-19
FIBP	non-TF	1.6237e-12	-1.20353	0.196	0.494	2.46153e-08
KIF5A	non-TF	8.59258e-22	-1.20572	0.047	0.322	1.30263e-17
RAB15	non-TF	1.10184e-25	-1.20873	0.04	0.333	1.67038e-21
ZMYND10	non-TF	2.81818e-49	-1.21836	0.002	0.276	4.27236e-45
TJAP1	non-TF	9.2388e-33	-1.22291	0.015	0.276	1.4006e-28
CCNI	non-TF	1.51265e-22	-1.22341	0.703	0.943	2.29317e-18
AC022182.2	non-TF	4.09648e-58	-1.23198	0.001	0.31	6.21026e-54
COX6A1	non-TF	1.13781e-29	-1.23227	0.786	0.989	1.72492e-25
LMOD1	non-TF	7.88263e-39	-1.23581	0.009	0.276	1.19501e-34
MAPK8IP1	non-TF	6.01154e-19	-1.23791	0.126	0.471	9.1135e-15
RTN4RL2	non-TF	3.87227e-56	-1.24362	0.004	0.322	5.87036e-52
CFAP299	non-TF	4.00395e-58	-1.24963	0.001	0.31	6.06998e-54
ACBD3-AS1	non-TF	2.64289e-51	-1.2559	0.001	0.276	4.00663e-47
HSP90AA1	non-TF	1.16832e-27	-1.2616	0.781	0.989	1.77117e-23	TRUE
FDPS	non-TF	7.63283e-14	-1.26611	0.441	0.782	1.15714e-09	TRUE
CLDN5	non-TF	1.60441e-40	-1.27248	0	0.207	2.43229e-36
TCTEX1D1	non-TF	5.48845e-43	-1.27654	0.013	0.322	8.3205e-39
AC084033.3	non-TF	2.21333e-19	-1.27699	0.218	0.632	3.35541e-15
RNF149	non-TF	8.8783e-20	-1.28029	0.103	0.448	1.34595e-15
SMIM18	non-TF	1.06284e-29	-1.28138	0.045	0.379	1.61127e-25
PPP1R1C	non-TF	6.7478e-46	-1.28809	0.012	0.333	1.02297e-41
CFAP126	non-TF	2.15148e-60	-1.29165	0.002	0.333	3.26164e-56
GIPC3	non-TF	7.21658e-65	-1.29397	0.001	0.345	1.09403e-60
CD79A	non-TF	2.20435e-40	-1.29703	0.001	0.218	3.34179e-36
SLC16A4	non-TF	4.16184e-29	-1.29904	0.05	0.391	6.30935e-25
SLC1A5	non-TF	2.52595e-28	-1.31128	0.03	0.31	3.82933e-24	TRUE
UQCRQ	non-TF	4.87821e-25	-1.31208	0.75	0.966	7.39536e-21
SMIM5	non-TF	5.391e-42	-1.31274	0.018	0.345	8.17275e-38
CTNNBL1	non-TF	3.92252e-20	-1.31637	0.095	0.425	5.94655e-16	TRUE
RIIAD1	non-TF	1.74478e-53	-1.3165	0.002	0.299	2.64508e-49
PKIA	non-TF	1.11207e-42	-1.31853	0.024	0.379	1.6859e-38
AKAP9	non-TF	2.96191e-18	-1.32292	0.4	0.782	4.49025e-14
C2orf70	non-TF	4.74359e-45	-1.32362	0.004	0.264	7.19129e-41
EPS8L2	non-TF	1.64902e-55	-1.32407	0.013	0.391	2.49992e-51
PGAM1	non-TF	2.68814e-16	-1.32442	0.235	0.598	4.07522e-12
ICA1L	non-TF	6.18663e-23	-1.33331	0.126	0.517	9.37892e-19
ACAT2	non-TF	2.79872e-23	-1.34024	0.144	0.552	4.24287e-19	TRUE
TEKT1	non-TF	1.05573e-62	-1.34933	0	0.322	1.60048e-58
SLC9A3R2	non-TF	3.17883e-14	-1.35265	0.116	0.402	4.8191e-10
CALM3	non-TF	1.22991e-21	-1.36624	0.389	0.816	1.86455e-17
NRN1	non-TF	1.92445e-51	-1.37126	0.001	0.276	2.91746e-47
SNHG18	non-TF	6.61602e-23	-1.37258	0.074	0.402	1.00299e-18
MOK	non-TF	4.31125e-17	-1.37441	0.075	0.345	6.53586e-13
XIRP2	non-TF	1.91627e-69	-1.37726	0	0.356	2.90507e-65	TRUE
MYO7A	non-TF	1.255e-38	-1.39003	0.034	0.402	1.90258e-34
TMX4	non-TF	6.7779e-27	-1.39008	0.133	0.563	1.02753e-22
FAM107B	non-TF	5.93457e-27	-1.40792	0.042	0.345	8.9968e-23
IFT57	non-TF	8.80086e-18	-1.41719	0.117	0.448	1.33421e-13
HIST1H4C	non-TF	3.94237e-24	-1.41791	0.801	0.989	5.97663e-20
COPRS	non-TF	4.52419e-20	-1.42146	0.307	0.713	6.85867e-16
PVALB	non-TF	6.35704e-45	-1.42826	0	0.23	9.63728e-41	TRUE
PJVK	non-TF	3.92295e-58	-1.42844	0.002	0.322	5.94719e-54
LRRIQ1	non-TF	1.17117e-29	-1.42889	0.043	0.368	1.7755e-25
KIFAP3	non-TF	3.15956e-20	-1.42958	0.185	0.575	4.78989e-16
CFAP221	non-TF	1.22733e-44	-1.4317	0.027	0.402	1.86063e-40
ROPN1L	non-TF	1.81834e-62	-1.43235	0.002	0.345	2.75661e-58
DNAAF3	non-TF	2.33484e-49	-1.43383	0.014	0.368	3.53962e-45
ZBBX	non-TF	1.06229e-71	-1.43822	0	0.368	1.61043e-67
SPAG8	non-TF	2.45468e-41	-1.44106	0.03	0.391	3.72129e-37
DYNLL1	non-TF	5.71317e-24	-1.44272	0.607	0.931	8.66117e-20
KCNMA1	non-TF	6.02219e-50	-1.44416	0.006	0.31	9.12964e-46	TRUE
C15orf61	non-TF	2.07323e-23	-1.45902	0.154	0.563	3.14302e-19
CCDC173	non-TF	2.578e-48	-1.46079	0.026	0.425	3.90825e-44
PLIN5	non-TF	1.01563e-35	-1.46788	0.028	0.356	1.53969e-31
PGK1	non-TF	2.16841e-22	-1.4695	0.323	0.782	3.28731e-18	TRUE
TMEM183A	non-TF	1.33804e-22	-1.46992	0.138	0.529	2.02846e-18
CALM2	non-TF	8.62909e-31	-1.48819	0.786	0.989	1.30817e-26
DRC1	non-TF	1.82599e-60	-1.49195	0	0.31	2.7682e-56
EPN3	non-TF	6.60119e-51	-1.49997	0.015	0.379	1.00074e-46
CYB5R1	non-TF	3.84329e-21	-1.50158	0.187	0.586	5.82643e-17	TRUE
AKNAD1	non-TF	6.26253e-45	-1.50978	0.063	0.552	9.494e-41
GFI1	TF	3.46279e-76	-1.51394	0.001	0.402	5.24959e-72
POU4F3	TF	1.29174e-60	-1.52	0.005	0.356	1.95827e-56
AC007114.2	non-TF	4.5604e-28	-1.52936	0.017	0.253	6.91357e-24
ATP6V1C2	non-TF	6.45047e-55	-1.53279	0.007	0.345	9.77891e-51
SRI	non-TF	2.66782e-19	-1.53365	0.408	0.77	4.04442e-15	TRUE
EFCAB1	non-TF	6.04073e-65	-1.5357	0	0.333	9.15774e-61
SPOCK2	non-TF	8.80606e-70	-1.53822	0.005	0.402	1.335e-65
HOMER2	non-TF	6.73249e-41	-1.54013	0.024	0.368	1.02065e-36
PCBD1	non-TF	6.58655e-21	-1.54484	0.251	0.655	9.98521e-17	TRUE
PGM2L1	non-TF	3.41361e-27	-1.57535	0.085	0.46	5.17503e-23
IQCG	non-TF	4.06643e-44	-1.58011	0.057	0.517	6.16471e-40
PARVB	non-TF	2.37991e-70	-1.58825	0.008	0.437	3.60794e-66
DYNLRB2	non-TF	6.06498e-37	-1.60036	0.102	0.586	9.19451e-33
MT3	non-TF	5.53535e-50	-1.61445	0.034	0.471	8.39158e-46	TRUE
GLTP	non-TF	3.43565e-29	-1.62885	0.153	0.632	5.20845e-25
C11orf87	non-TF	1.98205e-76	-1.64019	0.004	0.425	3.00478e-72
AC004540.2	non-TF	1.05136e-38	-1.65048	0.075	0.529	1.59387e-34
MIAT	non-TF	6.04659e-28	-1.66235	0.076	0.448	9.16663e-24
TAC1	non-TF	5.54084e-36	-1.67558	0.001	0.195	8.39991e-32	TRUE
PHTF2	non-TF	1.38228e-67	-1.67967	0.006	0.402	2.09553e-63
C2orf80	non-TF	3.91673e-67	-1.68564	0.004	0.379	5.93776e-63
TEKT2	non-TF	5.71394e-63	-1.71713	0.014	0.437	8.66233e-59
BMP2	non-TF	1.66796e-54	-1.71735	0.006	0.333	2.52862e-50	TRUE
CALCB	non-TF	2.07967e-27	-1.72292	0	0.138	3.15278e-23	TRUE
COX17	non-TF	1.4636e-31	-1.73321	0.561	0.943	2.21881e-27
FRMD4B	non-TF	3.68876e-25	-1.74375	0.281	0.736	5.59216e-21
C9orf24	non-TF	1.14027e-58	-1.75827	0.005	0.345	1.72865e-54
PAK3	non-TF	1.66146e-68	-1.76109	0.025	0.529	2.51878e-64	TRUE
TPM1	non-TF	1.42924e-30	-1.77079	0.186	0.678	2.16673e-26
STARD10	non-TF	5.85376e-30	-1.77373	0.263	0.759	8.8743e-26
AP3B2	non-TF	7.88981e-65	-1.77687	0.004	0.368	1.1961e-60
MORN5	non-TF	1.87138e-62	-1.78725	0.017	0.448	2.83702e-58
TMEM255B	non-TF	2.57803e-73	-1.78909	0.009	0.46	3.90829e-69
TEX26	non-TF	1.35712e-76	-1.79096	0.011	0.483	2.05739e-72
LYPLA2	non-TF	1.10751e-46	-1.79771	0.06	0.54	1.67898e-42
GRXCR1	non-TF	2.01108e-85	-1.80952	0.002	0.46	3.0488e-81
OCIAD2	non-TF	1.85411e-32	-1.81142	0.257	0.816	2.81084e-28
ATP2A1-AS1	non-TF	1.49528e-70	-1.83262	0.007	0.425	2.26684e-66
IRX2	TF	1.96978e-85	-1.84685	0.023	0.609	2.98619e-81
BDNF	non-TF	3.27604e-76	-1.85515	0.002	0.414	4.96647e-72	TRUE
PPP1R32	non-TF	3.7883e-85	-1.85915	0.004	0.471	5.74306e-81
MNS1	non-TF	2.73192e-60	-1.8643	0.036	0.529	4.14159e-56
DNAAF1	non-TF	1.19795e-78	-1.86539	0.009	0.483	1.81609e-74
FAM81B	non-TF	3.08038e-78	-1.86626	0.002	0.425	4.66986e-74
SQLE	non-TF	2.63147e-42	-1.89301	0.142	0.713	3.9893e-38	TRUE
CFAP157	non-TF	7.52328e-97	-1.8955	0.004	0.529	1.14053e-92
HOPX	TF	1.13117e-34	-1.91491	0.202	0.759	1.71485e-30
RSPO3	non-TF	1.1145e-94	-1.91601	0.004	0.517	1.68959e-90	TRUE
VDAC3	non-TF	1.20339e-36	-1.92552	0.261	0.816	1.82434e-32	TRUE
GAMT	non-TF	3.14931e-28	-1.93203	0.236	0.713	4.77435e-24
LYSMD2	non-TF	7.9836e-62	-1.93356	0.042	0.563	1.21031e-57
STRC	non-TF	3.40041e-90	-1.93544	0.005	0.506	5.15503e-86
CTXND2	non-TF	2.71903e-83	-1.94171	0.005	0.471	4.12204e-79
C2orf40	non-TF	3.75496e-36	-1.94227	0.219	0.77	5.69251e-32
RSPH4A	non-TF	3.22108e-86	-1.94854	0.007	0.506	4.88316e-82
MYO15A	non-TF	1.25751e-76	-1.96163	0.028	0.598	1.90639e-72
CCDC146	non-TF	1.45505e-79	-1.96202	0.02	0.563	2.20586e-75
COQ6	non-TF	7.01656e-53	-1.97507	0.039	0.506	1.06371e-48
FAM19A3	non-TF	5.80222e-62	-1.98641	0.046	0.586	8.79616e-58
PTPRQ	non-TF	1.08178e-89	-2.00733	0.005	0.506	1.63997e-85
HLA-DQB1	non-TF	2.24846e-81	-2.00812	0.013	0.529	3.40866e-77	TRUE
C11orf97	non-TF	3.81417e-106	-2.03538	0.004	0.575	5.78228e-102
ATP6V1F	non-TF	1.37201e-37	-2.06232	0.497	0.954	2.07997e-33
LRRC10B	non-TF	1.25981e-84	-2.06354	0.009	0.517	1.90987e-80
MSMO1	non-TF	2.13965e-56	-2.06402	0.104	0.736	3.2437e-52
NEFL	non-TF	1.06317e-101	-2.06443	0.004	0.552	1.61177e-97
C1orf194	non-TF	2.73306e-96	-2.07437	0.008	0.563	4.14332e-92
TRIM36	non-TF	4.01441e-80	-2.07535	0.019	0.563	6.08585e-76
MYO6	non-TF	7.33377e-36	-2.09405	0.444	0.931	1.1118e-31
TMIE	non-TF	2.48406e-99	-2.12435	0.004	0.54	3.76583e-95
DNER	non-TF	1.28523e-83	-2.13002	0.032	0.644	1.9484e-79	TRUE
CCDC28B	non-TF	1.52005e-59	-2.13115	0.081	0.69	2.3044e-55
BBOF1	non-TF	6.44879e-65	-2.18092	0.078	0.713	9.77636e-61
CHGB	non-TF	5.46738e-92	-2.18455	0.002	0.494	8.28855e-88
WDR25	non-TF	4.76222e-70	-2.18993	0.075	0.724	7.21952e-66
C9orf116	non-TF	2.8765e-86	-2.25761	0.025	0.621	4.36078e-82
ATP2B2	non-TF	1.50778e-94	-2.25763	0.001	0.494	2.28579e-90
CETN2	non-TF	1.25743e-41	-2.26436	0.345	0.897	1.90626e-37
SYT1	non-TF	3.54144e-101	-2.26731	0.005	0.563	5.36882e-97	TRUE
EFHD2	non-TF	1.68674e-61	-2.28807	0.065	0.644	2.55709e-57
CPE	non-TF	3.51449e-91	-2.29822	0.014	0.586	5.32796e-87
CAMK2B	non-TF	2.04563e-116	-2.31848	0.005	0.632	3.10117e-112	TRUE
CALM1	non-TF	1.62639e-46	-2.32132	0.458	0.977	2.46561e-42	TRUE
LMO7	non-TF	1.46003e-48	-2.33248	0.164	0.782	2.2134e-44
ENC1	non-TF	1.52951e-90	-2.36873	0.019	0.609	2.31873e-86
CCDC68	non-TF	4.52775e-52	-2.37408	0.177	0.816	6.86407e-48
CHGA	non-TF	4.32719e-106	-2.37645	0.005	0.586	6.56002e-102
SHTN1	non-TF	8.87561e-51	-2.38276	0.19	0.828	1.34554e-46
ELMOD1	non-TF	1.67777e-118	-2.39416	0.006	0.655	2.54351e-114
DNAJC5B	non-TF	3.72118e-121	-2.4069	0.005	0.655	5.64131e-117
C5orf49	non-TF	2.05161e-103	-2.46417	0.024	0.701	3.11024e-99
KIF9	non-TF	6.33644e-65	-2.48632	0.138	0.839	9.60604e-61
SCG3	non-TF	3.5968e-118	-2.49473	0.004	0.632	5.45275e-114
OTOF	non-TF	5.949e-100	-2.49845	0.006	0.563	9.01868e-96
VSIG10L2	non-TF	2.41477e-90	-2.53714	0.005	0.506	3.6608e-86
CALB1	non-TF	2.12559e-26	-2.74337	0.012	0.218	3.22239e-22
PTRH1	non-TF	1.71209e-80	-2.74383	0.104	0.862	2.59554e-76
ESPN	non-TF	1.81365e-117	-2.78833	0.023	0.759	2.74949e-113
AP3S1	non-TF	4.25139e-93	-2.81081	0.074	0.851	6.4451e-89
CAMK2N1	non-TF	3.56413e-68	-2.84692	0.132	0.839	5.40322e-64
PGA5	non-TF	1.73732e-132	-2.86157	0.004	0.701	2.63377e-128	TRUE
PKIB	non-TF	3.84765e-122	-2.89276	0.017	0.747	5.83303e-118
CRIP3	non-TF	2.36381e-130	-2.91616	0.014	0.77	3.58354e-126
SMPX	non-TF	6.46333e-50	-3.0201	0.39	0.966	9.79841e-46
C20orf85	non-TF	6.62031e-144	-3.04616	0.007	0.782	1.00364e-139
ERICH3	non-TF	1.57772e-139	-3.09443	0.002	0.724	2.39182e-135	TRUE
CD164L2	non-TF	1.26906e-138	-3.13355	0.015	0.816	1.9239e-134
MINDY4B	non-TF	1.38918e-143	-3.28357	0.012	0.816	2.106e-139
CIB2	non-TF	7.51371e-146	-3.31719	0.023	0.897	1.13908e-141
RSPH1	non-TF	2.59926e-91	-3.35375	0.109	0.92	3.94048e-87
GPX2	non-TF	5.83428e-119	-3.388	0.047	0.885	8.84478e-115
SYT14	non-TF	2.4983e-144	-3.48331	0.013	0.828	3.78742e-140
C1orf232	non-TF	1.26865e-139	-3.53237	0.03	0.897	1.92327e-135
ABCA5	non-TF	2.37303e-73	-3.61501	0.208	0.954	3.59751e-69	TRUE
ADAM11	non-TF	2.53048e-132	-3.66114	0.009	0.747	3.83621e-128
OCM	non-TF	1.06402e-118	-3.6621	0.011	0.69	1.61305e-114
CABP2	non-TF	7.06844e-170	-3.71453	0.007	0.908	1.07157e-165
SNCG	non-TF	2.51259e-155	-3.74977	0.011	0.862	3.80908e-151
FAM183A	non-TF	1.0103e-172	-3.9963	0.014	0.966	1.53161e-168
PCP4	non-TF	1.50703e-160	-4.20746	0.011	0.885	2.28466e-156
PPP1R27	non-TF	1.5429e-150	-4.38528	0.011	0.839	2.33903e-146
SCGB2A1	non-TF	4.05174e-173	-4.85275	0.014	0.966	6.14245e-169
CIB3	non-TF	7.17067e-102	-4.97068	0.028	0.713	1.08707e-97

## Sheet: Table S3. Type I vs Type II HC
Table S3. Gene expression enriched in type I or type II hair cells (HC) clusters from an untreated utricle (scUntr-2). Related to Figure 3c.
Transcription factors (TF) were detected using AnimalTFDB 3.0, druggable genes using DGIdb 4.0.
Gene	TF	p_val	avg_log2FC	pct.1	pct.2	p_val_adj	Drug
ADAM11	non-TF	1.12781e-09	3.70557	0.926	0.105	1.70976e-05
OCM	non-TF	5.04011e-08	3.68321	0.838	0.158	0.000764081
PPP1R27	non-TF	9.79385e-09	3.07849	0.956	0.421	0.000148475
VSIG10L2	non-TF	1.54557e-05	2.62093	0.632	0.053	0.234309
ENC1	non-TF	7.9359e-07	2.41485	0.75	0.105	0.0120308
ATP2B2	non-TF	2.53888e-05	2.3378	0.618	0.053	0.384894
PTPRZ1	non-TF	5.2129e-07	2.31248	0.853	0.474	0.00790276	TRUE
HOPX	TF	1.31869e-06	2.20075	0.838	0.474	0.0199913
BMP2	non-TF	0.000757824	1.99652	0.426	0	1	TRUE
PCP4	non-TF	2.03492e-06	1.92667	0.956	0.632	0.0308494
SYT1	non-TF	0.000162205	1.88002	0.647	0.263	1	TRUE
PGA5	non-TF	8.83385e-05	1.70791	0.794	0.368	1	TRUE
AP3B2	non-TF	0.00366657	1.69187	0.441	0.105	1
GAMT	non-TF	0.000218784	1.66308	0.765	0.526	1
EFHD2	non-TF	0.000144245	1.64465	0.721	0.368	1
CTXND2	non-TF	0.000225023	1.5972	0.588	0.053	1
MZT2A	non-TF	0.00535064	1.57621	0.456	0.158	1
BDNF	non-TF	0.0044371	1.572	0.485	0.158	1	TRUE
ERICH3	non-TF	0.000611682	1.57196	0.765	0.579	1	TRUE
C11orf87	non-TF	0.00226503	1.52221	0.5	0.158	1
SNCG	non-TF	4.14312e-05	1.42225	0.912	0.684	0.628097
HMGN3	non-TF	0.000464519	1.40472	0.75	0.421	1
ATP2A1-AS1	non-TF	0.00809917	1.37768	0.485	0.211	1
SYT14	non-TF	0.0015392	1.3583	0.838	0.789	1
PPP1R32	non-TF	0.00423596	1.34157	0.544	0.211	1
TMEM183A	non-TF	0.00846704	1.33795	0.574	0.368	1
DNM1	non-TF	0.00822035	1.318	0.353	0.053	1
COX14	non-TF	0.00381678	1.28895	0.662	0.526	1
FRMD4B	non-TF	0.0020358	1.2791	0.735	0.737	1
FDPS	non-TF	0.000491301	1.22174	0.824	0.632	1	TRUE
CABP2	non-TF	0.000146158	1.20743	0.882	1	1
CIB2	non-TF	0.000302549	1.16191	0.897	0.895	1
TMX4	non-TF	0.00424227	1.14286	0.618	0.368	1
CALM2	non-TF	1.96813e-06	1.13875	1	0.947	0.0298368
AP3S1	non-TF	0.0024409	1.05939	0.882	0.737	1
SMPX	non-TF	0.00106721	1.04215	0.971	0.947	1
GPX2	non-TF	0.00165489	1.03311	0.897	0.842	1
AKR1A1	non-TF	0.0018654	0.927571	0.897	0.789	1	TRUE
COX4I1	non-TF	0.00247227	0.912543	0.912	0.895	1
MYO6	non-TF	0.00435325	0.874912	0.941	0.895	1
RPL7A	non-TF	2.4728e-05	0.809383	0.985	1	0.374877
HIST1H4C	non-TF	0.00920541	0.762569	0.985	1	1
GSTP1	non-TF	0.00464901	0.678327	0.956	1	1	TRUE
COX6A1	non-TF	0.000114461	0.672433	0.985	1	1
MT-ND5	non-TF	0.00545279	0.4677	0.985	1	1	TRUE
CWC25	non-TF	0.00158768	-0.250221	0.015	0.211	1
PEX3	non-TF	0.00755924	-0.251385	0	0.105	1
SIGMAR1	non-TF	0.00755924	-0.251385	0	0.105	1	TRUE
CYBRD1	non-TF	0.00755924	-0.252236	0	0.105	1
RNF14	non-TF	0.00755924	-0.252236	0	0.105	1
FZD2	non-TF	0.00755924	-0.252236	0	0.105	1	TRUE
ARVCF	non-TF	0.00755924	-0.252236	0	0.105	1
GRIK1	non-TF	0.00755924	-0.252236	0	0.105	1	TRUE
XKR8	non-TF	0.00755924	-0.252589	0	0.105	1
ACAA2	non-TF	0.00755924	-0.253131	0	0.105	1
PTCD3	non-TF	0.00851305	-0.254351	0.029	0.211	1
CCDC88B	non-TF	0.00755924	-0.255442	0	0.105	1
SOBP	non-TF	0.00958929	-0.255669	0.015	0.158	1
PICALM	non-TF	0.00755924	-0.256066	0	0.105	1	TRUE
TARBP2	non-TF	0.00755924	-0.256066	0	0.105	1
FOXJ2	TF	0.00958929	-0.256137	0.015	0.158	1
DENND4B	non-TF	0.00755924	-0.256418	0	0.105	1
Z84484.1	non-TF	0.00755924	-0.256418	0	0.105	1
BCL2L1	non-TF	0.00882896	-0.258306	0.015	0.158	1	TRUE
SDC3	non-TF	0.00755924	-0.258473	0	0.105	1
ARL13B	non-TF	0.00755924	-0.258473	0	0.105	1
SOX21	TF	0.00755924	-0.258473	0	0.105	1
ACVR1	non-TF	0.00755924	-0.25891	0	0.105	1	TRUE
AC100786.1	non-TF	0.00755924	-0.25891	0	0.105	1
FOXRED2	non-TF	0.00755924	-0.25891	0	0.105	1
DNAJB2	non-TF	0.00851305	-0.2591	0.029	0.211	1
PTPRU	non-TF	0.00755924	-0.260775	0	0.105	1
RPL21	non-TF	0.00791418	-0.260908	1	1	1
SFT2D1	non-TF	0.00755924	-0.261892	0	0.105	1
LZTS2	non-TF	0.00755924	-0.262286	0	0.105	1
LYPD3	non-TF	0.00755924	-0.262286	0	0.105	1
CACNA2D1	non-TF	0.00958929	-0.263745	0.015	0.158	1	TRUE
ITPR2	non-TF	0.00882896	-0.264808	0.015	0.158	1	TRUE
TRIM2	non-TF	0.00152979	-0.266337	0.029	0.263	1
CPTP	non-TF	0.00755924	-0.266539	0	0.105	1
AC137723.1	non-TF	0.00755924	-0.266539	0	0.105	1
RLBP1	non-TF	0.00755924	-0.266684	0	0.105	1
TPPP	non-TF	0.000971555	-0.267933	0	0.158	1
AC025159.1	non-TF	0.000971555	-0.268454	0	0.158	1
PPIH	non-TF	0.00851305	-0.272156	0.029	0.211	1
PRRT1	non-TF	0.00755924	-0.272715	0	0.105	1
UBQLN2	non-TF	0.00755924	-0.273553	0	0.105	1
PROSER1	non-TF	0.00755924	-0.273553	0	0.105	1
NFX1	TF	0.00755924	-0.274941	0	0.105	1
TFB1M	TF	0.00851305	-0.276166	0.029	0.211	1
AL121601.1	non-TF	0.000971555	-0.277262	0	0.158	1
BMPR1B	non-TF	0.00755924	-0.277327	0	0.105	1	TRUE
SMPD2	non-TF	0.00755924	-0.277327	0	0.105	1
CHIC1	non-TF	0.00755924	-0.277327	0	0.105	1
CAVIN1	non-TF	0.00958929	-0.278268	0.015	0.158	1
FIG4	non-TF	0.00755924	-0.279302	0	0.105	1
C8orf37	non-TF	0.00755924	-0.279302	0	0.105	1
BBS7	non-TF	0.00755924	-0.280633	0	0.105	1
ZNF214	TF	0.00755924	-0.280633	0	0.105	1
COL4A2	non-TF	0.00158768	-0.2811	0.015	0.211	1	TRUE
CDC42EP4	non-TF	0.000971555	-0.281149	0	0.158	1
C9orf16	non-TF	0.00870531	-0.281422	0.25	0.684	1
LRRC7	non-TF	0.00755924	-0.281894	0	0.105	1
AC023355.1	non-TF	0.00755924	-0.281894	0	0.105	1
SCRN2	non-TF	0.00851305	-0.285774	0.029	0.211	1
DUSP23	non-TF	0.00755924	-0.287624	0	0.105	1
DNAJC19	non-TF	0.000727052	-0.290208	0.074	0.421	1
SLC25A48	non-TF	0.00755924	-0.290744	0	0.105	1
MTHFD2	non-TF	0.00958929	-0.292592	0.015	0.158	1
SPR	non-TF	0.000971555	-0.293611	0	0.158	1	TRUE
CCSER1	non-TF	0.00755924	-0.294005	0	0.105	1
LINC00937	non-TF	0.00755924	-0.294005	0	0.105	1
SORCS1	non-TF	0.00958929	-0.294931	0.015	0.158	1
FOXK1	TF	0.00958929	-0.295302	0.015	0.158	1
SPTBN2	non-TF	0.00755924	-0.295825	0	0.105	1
ZNF280D	TF	0.00755924	-0.295825	0	0.105	1
PXYLP1	non-TF	0.00851305	-0.296149	0.029	0.211	1
SPRY2	non-TF	0.000971555	-0.296731	0	0.158	1
LMLN	non-TF	0.00755924	-0.296988	0	0.105	1
TNFSF10	non-TF	0.00755924	-0.297197	0	0.105	1	TRUE
AC007383.3	non-TF	0.00755924	-0.29754	0	0.105	1
FAM19A2	non-TF	0.000971555	-0.298065	0	0.158	1
TMEM87B	non-TF	0.000971555	-0.29984	0	0.158	1
PRELID3B	non-TF	0.000971555	-0.300445	0	0.158	1
ALAD	non-TF	0.000971555	-0.300786	0	0.158	1	TRUE
MYL5	non-TF	0.00958929	-0.301107	0.015	0.158	1
SOX1-OT	non-TF	0.00755924	-0.302699	0	0.105	1
PITPNC1	non-TF	0.000971555	-0.302779	0	0.158	1
STX18	non-TF	0.00755924	-0.303412	0	0.105	1
ZNF658	TF	0.00755924	-0.303412	0	0.105	1
SPIRE1	non-TF	0.00755924	-0.303412	0	0.105	1
KIF3C	non-TF	0.00755924	-0.305833	0	0.105	1
DTWD2	non-TF	0.00755924	-0.305833	0	0.105	1
KNSTRN	non-TF	0.00755924	-0.306397	0	0.105	1
DHRS11	non-TF	0.000971555	-0.306477	0	0.158	1
LRRC8C-DT	non-TF	0.00741102	-0.306538	0.029	0.211	1
LTBP1	non-TF	0.00755924	-0.309181	0	0.105	1
DHX15	non-TF	0.00755924	-0.309181	0	0.105	1
WWP1	non-TF	0.00755924	-0.309181	0	0.105	1
AC010329.1	non-TF	0.00755924	-0.309181	0	0.105	1
RDH13	non-TF	0.00755924	-0.30952	0	0.105	1
FAM162A	non-TF	0.00873847	-0.30983	0.147	0.474	1
FLOT1	non-TF	0.00755924	-0.31025	0	0.105	1
AGPAT4	non-TF	0.00755924	-0.31025	0	0.105	1
NXT2	non-TF	0.00755924	-0.31025	0	0.105	1
SLX4	non-TF	0.00755924	-0.31025	0	0.105	1
APBA3	non-TF	0.00755924	-0.31025	0	0.105	1
POLR3F	non-TF	0.00755924	-0.310772	0	0.105	1
AC234582.1	non-TF	0.00755924	-0.311843	0	0.105	1
CIT	non-TF	0.00755924	-0.311843	0	0.105	1
PELP1	non-TF	0.00882896	-0.312326	0.015	0.158	1
ORAI1	non-TF	0.00622004	-0.313394	0.044	0.263	1	TRUE
SELENBP1	non-TF	0.00453374	-0.313468	0.044	0.263	1
CRELD2	non-TF	0.00911567	-0.313824	0.118	0.421	1
AC020928.1	non-TF	0.00755924	-0.313929	0	0.105	1
HSH2D	non-TF	0.00622004	-0.315496	0.044	0.263	1
HIST2H2BE	non-TF	0.00755924	-0.317865	0	0.105	1
OLMALINC	non-TF	0.00851305	-0.318648	0.029	0.211	1
KCTD20	non-TF	0.000971555	-0.322983	0	0.158	1
SYVN1	non-TF	0.000971555	-0.322983	0	0.158	1
ELF1	TF	0.00158768	-0.323741	0.015	0.211	1
LINC00909	non-TF	0.000971555	-0.325498	0	0.158	1
CD151	non-TF	0.00882896	-0.326732	0.015	0.158	1
B9D1	non-TF	0.00794494	-0.32733	0.029	0.211	1
CCDC9B	non-TF	0.000971555	-0.327715	0	0.158	1
CLIC1	non-TF	0.00166245	-0.328803	0.074	0.368	1
HACD2	non-TF	0.00755924	-0.329679	0	0.105	1
MGME1	non-TF	0.00755924	-0.329679	0	0.105	1
OSGEPL1	non-TF	0.00755924	-0.331701	0	0.105	1
ABHD13	non-TF	0.00755924	-0.331701	0	0.105	1
CYFIP1	non-TF	0.00755924	-0.331733	0	0.105	1
EFR3B	non-TF	0.000971555	-0.331896	0	0.158	1
HIST1H1E	non-TF	0.00882896	-0.331973	0.015	0.158	1
SLC6A14	non-TF	0.00755924	-0.333197	0	0.105	1	TRUE
ELMOD3	non-TF	0.000971555	-0.333358	0	0.158	1
COPZ1	non-TF	0.00617963	-0.333417	0.176	0.526	1
ZNF101	TF	0.00958929	-0.333933	0.015	0.158	1
MORN1	non-TF	0.00158768	-0.335589	0.015	0.211	1
AC010531.6	non-TF	0.00958929	-0.335785	0.015	0.158	1
SDCBP	non-TF	0.00105023	-0.335935	0.103	0.474	1
MT1E	non-TF	0.000952211	-0.336048	0.044	0.316	1	TRUE
PECR	non-TF	0.00158768	-0.336707	0.015	0.211	1
GNPTG	non-TF	0.00369584	-0.337282	0.059	0.316	1
LINC00461	non-TF	0.000971555	-0.340679	0	0.158	1
TMEM139	non-TF	0.00882896	-0.341376	0.015	0.158	1
HINT3	non-TF	0.00851305	-0.341909	0.029	0.211	1
RPRM	non-TF	0.00882896	-0.342221	0.015	0.158	1
MRM2	non-TF	0.000230126	-0.342532	0.015	0.263	1	TRUE
ERLIN1	non-TF	0.000971555	-0.34438	0	0.158	1
AC058791.1	non-TF	0.000971555	-0.345687	0	0.158	1
ZSCAN21	TF	0.00755924	-0.346038	0	0.105	1
FCRLB	non-TF	0.00755924	-0.346519	0	0.105	1
SLC40A1	non-TF	0.00755924	-0.346519	0	0.105	1	TRUE
DAPK3	non-TF	0.00851305	-0.348027	0.029	0.211	1	TRUE
ADRM1	non-TF	0.00407914	-0.348129	0.103	0.421	1	TRUE
GDPD5	non-TF	0.00690951	-0.349047	0.029	0.211	1
AC004951.1	non-TF	0.00158768	-0.349349	0.015	0.211	1
HNMT	non-TF	0.000971555	-0.350943	0	0.158	1	TRUE
RNF13	non-TF	0.00369584	-0.351255	0.059	0.316	1
NFKBIL1	non-TF	0.00794494	-0.35154	0.029	0.211	1	TRUE
POLR2E	non-TF	0.004158	-0.351633	0.059	0.316	1
VANGL2	non-TF	0.00755924	-0.352363	0	0.105	1
NEUROD4	TF	0.00755924	-0.352363	0	0.105	1
WIPI1	non-TF	0.00755924	-0.352363	0	0.105	1
GAN	non-TF	0.000971555	-0.352405	0	0.158	1
NR3C1	TF	0.00158768	-0.353005	0.015	0.211	1	TRUE
TRIM62	non-TF	0.00958929	-0.354353	0.015	0.158	1
XRCC4	non-TF	0.00755924	-0.354485	0	0.105	1	TRUE
ZFAND1	non-TF	0.00131571	-0.354975	0.029	0.263	1
MAGEH1	non-TF	0.00690951	-0.355107	0.029	0.211	1
FUZ	non-TF	0.00525248	-0.355322	0.088	0.368	1
TRIM38	non-TF	0.000971555	-0.356588	0	0.158	1
AGPS	non-TF	0.00755924	-0.357723	0	0.105	1
UNC5D	non-TF	0.00755924	-0.357723	0	0.105	1
RDH10	non-TF	0.00121827	-0.357786	0.015	0.211	1
EPHA4	non-TF	0.000971555	-0.358919	0	0.158	1	TRUE
DPM1	non-TF	0.000971555	-0.359249	0	0.158	1
ANKS1B	non-TF	0.00741102	-0.35925	0.029	0.211	1	TRUE
RIMKLA	non-TF	0.00755924	-0.359298	0	0.105	1
NKAIN3	non-TF	0.00755924	-0.359298	0	0.105	1
CNTN1	non-TF	0.00755924	-0.359298	0	0.105	1
TPPP3	non-TF	0.00755924	-0.359414	0	0.105	1
KCNMB3	non-TF	0.00755924	-0.359625	0	0.105	1
DCAKD	non-TF	0.000125102	-0.359752	0	0.211	1
ETV7	TF	0.000971555	-0.36041	0	0.158	1
LRP1	non-TF	0.000971555	-0.362149	0	0.158	1	TRUE
PDIA4	non-TF	0.00453374	-0.363327	0.044	0.263	1
IPO13	non-TF	0.00690951	-0.363909	0.029	0.211	1	TRUE
ACAT1	non-TF	0.00369584	-0.36511	0.059	0.316	1	TRUE
VCL	non-TF	0.00882896	-0.365737	0.015	0.158	1
MYL12A	non-TF	0.00746901	-0.365882	0.088	0.368	1
MACROD1	non-TF	0.00611717	-0.365925	0.088	0.368	1
CCDC144A	non-TF	0.00755924	-0.366497	0	0.105	1
LYRM9	non-TF	0.00278535	-0.368039	0.074	0.368	1
C12orf29	non-TF	0.00794494	-0.369159	0.029	0.211	1
TUBA1B	non-TF	0.00911567	-0.370156	0.118	0.421	1	TRUE
MTERF3	non-TF	0.000971555	-0.37052	0	0.158	1
UCK1	non-TF	0.00158768	-0.371362	0.015	0.211	1
OGT	non-TF	0.00755924	-0.371888	0	0.105	1
TMEM206	non-TF	0.00995827	-0.371891	0.118	0.421	1
SMYD3	non-TF	0.000971555	-0.372373	0	0.158	1
UBLCP1	non-TF	0.000971555	-0.373607	0	0.158	1
SLC17A8	non-TF	0.00755924	-0.373769	0	0.105	1
ZNF22	TF	0.00483349	-0.374024	0.044	0.263	1
ATP2C2	non-TF	0.000971555	-0.374952	0	0.158	1
TMEM161B-AS1	non-TF	0.00794494	-0.376288	0.029	0.211	1
PKN2	non-TF	0.00210327	-0.37767	0.088	0.421	1	TRUE
EBF3	TF	0.000971555	-0.378146	0	0.158	1
FAM189A2	non-TF	0.00755924	-0.3791	0	0.105	1
EIF3C	non-TF	0.00755924	-0.379215	0	0.105	1
TTC31	non-TF	0.00755924	-0.379539	0	0.105	1
SCTR	non-TF	0.00755924	-0.379539	0	0.105	1	TRUE
MTMR3	non-TF	0.00755924	-0.379539	0	0.105	1
LRRFIP1	TF	0.00690951	-0.382199	0.029	0.211	1
GMCL1	non-TF	0.00152979	-0.382756	0.029	0.263	1
EIF3B	non-TF	0.00125301	-0.382825	0.044	0.316	1
AKAP12	non-TF	0.000209889	-0.383006	0.015	0.263	1
TAGLN3	non-TF	0.000971555	-0.384911	0	0.158	1
ZNF638	non-TF	0.00611717	-0.387329	0.088	0.368	1
LARP1	non-TF	0.00257559	-0.388218	0.059	0.316	1
TRIM33	non-TF	0.00690951	-0.388277	0.029	0.211	1
IGDCC3	non-TF	0.0014544	-0.388392	0.015	0.211	1
PXDC1	non-TF	0.000971555	-0.388561	0	0.158	1
KLC3	non-TF	0.00599695	-0.388641	0.029	0.211	1	TRUE
KHDRBS1	non-TF	0.00955753	-0.389283	0.206	0.579	1
ANKS3	non-TF	0.000971555	-0.389491	0	0.158	1
CLNS1A	non-TF	0.00938521	-0.389989	0.074	0.316	1
FBXO25	non-TF	0.00158768	-0.390042	0.015	0.211	1
INO80	non-TF	0.00988285	-0.390742	0.074	0.316	1
ZNF326	TF	0.00871873	-0.391581	0.118	0.421	1
ALDH7A1	non-TF	0.00882896	-0.393516	0.015	0.158	1	TRUE
C17orf82	non-TF	0.00755924	-0.393731	0	0.105	1
RBM4	non-TF	0.00755924	-0.393841	0	0.105	1
ATP2B4	non-TF	0.000971555	-0.393864	0	0.158	1
NGDN	non-TF	0.00584335	-0.393901	0.044	0.263	1
PACSIN2	non-TF	0.00958929	-0.395464	0.015	0.158	1	TRUE
METTL23	non-TF	0.00369584	-0.395909	0.059	0.316	1
BAG4	non-TF	0.000971555	-0.396461	0	0.158	1
PRUNE2	non-TF	0.000971555	-0.397593	0	0.158	1
C19orf25	non-TF	0.000971555	-0.397789	0	0.158	1
BEND6	non-TF	0.000125102	-0.398634	0	0.211	1
TARBP1	non-TF	0.00755924	-0.398703	0	0.105	1
GALNS	non-TF	0.00755924	-0.398703	0	0.105	1	TRUE
AL139220.2	non-TF	0.00755924	-0.399022	0	0.105	1
AC008608.2	non-TF	0.00158768	-0.399641	0.015	0.211	1
TEX261	non-TF	0.00882896	-0.399733	0.015	0.158	1
AHNAK	non-TF	0.00133151	-0.400269	0.015	0.211	1
CPSF3	non-TF	0.00755924	-0.400931	0	0.105	1
ITGA8	non-TF	0.000971555	-0.400972	0	0.158	1
TCEAL6	non-TF	0.000125102	-0.401463	0	0.211	1
C1orf54	non-TF	0.0014544	-0.401874	0.015	0.211	1
DUSP1	non-TF	0.00133151	-0.401938	0.015	0.211	1	TRUE
S100A14	non-TF	0.000230126	-0.40197	0.015	0.263	1
HECTD1	non-TF	0.000230126	-0.402304	0.015	0.263	1
TMC4	non-TF	0.00622004	-0.402663	0.044	0.263	1
SPG21	non-TF	0.00882896	-0.402727	0.015	0.158	1
BAX	non-TF	0.0064387	-0.402895	0.029	0.211	1	TRUE
BZW2	non-TF	0.00755924	-0.404339	0	0.105	1
TNFRSF19	non-TF	0.000191333	-0.406074	0.015	0.263	1
AC046130.1	non-TF	0.00755924	-0.406209	0	0.105	1
RHOU	non-TF	0.00812294	-0.40671	0.015	0.158	1
UNK	non-TF	0.00515105	-0.406842	0.044	0.263	1
PLEKHA6	non-TF	0.000971555	-0.407852	0	0.158	1	TRUE
SSX2IP	non-TF	0.00440821	-0.409104	0.059	0.316	1
KCNQ1	non-TF	0.000971555	-0.409441	0	0.158	1	TRUE
LAMTOR2	non-TF	0.00402513	-0.41006	0.191	0.579	1
RNF24	non-TF	0.000971555	-0.410216	0	0.158	1
OLFM1	non-TF	0.00755924	-0.410928	0	0.105	1
IRX3	TF	0.000971555	-0.411073	0	0.158	1
ALDH3A2	non-TF	0.00882896	-0.411339	0.015	0.158	1	TRUE
BNIP2	non-TF	0.00851305	-0.411962	0.029	0.211	1
CDC14B	non-TF	0.000971555	-0.412558	0	0.158	1
AL139353.1	non-TF	0.00755924	-0.413238	0	0.105	1
FGFRL1	non-TF	0.00882896	-0.413465	0.015	0.158	1	TRUE
TBPL1	non-TF	0.00690951	-0.41502	0.029	0.211	1
COA4	non-TF	0.00515105	-0.415098	0.044	0.263	1
GPR137	non-TF	0.00158768	-0.41541	0.015	0.211	1
MAEA	non-TF	0.000971555	-0.415985	0	0.158	1
PSMC3	non-TF	0.00521316	-0.416458	0.132	0.474	1	TRUE
MAP2K5	non-TF	0.00158768	-0.417085	0.015	0.211	1	TRUE
CASP3	non-TF	0.000971555	-0.417438	0	0.158	1	TRUE
SERTAD4-AS1	non-TF	0.000614705	-0.418471	0.059	0.368	1
AC007405.3	non-TF	0.00152979	-0.420022	0.029	0.263	1
SUMF2	non-TF	0.000971555	-0.421051	0	0.158	1
C17orf58	non-TF	0.000971555	-0.421583	0	0.158	1
AC025283.2	non-TF	0.000971555	-0.421695	0	0.158	1
ARL4C	non-TF	0.00158768	-0.422553	0.015	0.211	1
TRAPPC2B	non-TF	0.00891005	-0.422654	0.074	0.316	1
TMEM106B	non-TF	0.00741102	-0.423289	0.029	0.211	1
POR	non-TF	0.00581565	-0.42466	0.088	0.368	1	TRUE
TCEAL5	non-TF	0.00741102	-0.424913	0.029	0.211	1
ERCC3	non-TF	0.00755924	-0.425119	0	0.105	1	TRUE
CDC42EP5	non-TF	0.00755924	-0.425807	0	0.105	1
CDC34	non-TF	0.00802369	-0.426811	0.074	0.316	1
RPS6KB1	non-TF	0.00958929	-0.427676	0.015	0.158	1	TRUE
S100A1	non-TF	9.7458e-06	-0.429148	1	1	0.147746
DUSP11	non-TF	0.000125102	-0.429566	0	0.211	1
ZRSR2	non-TF	0.00440821	-0.429711	0.059	0.316	1	TRUE
PUF60	non-TF	0.000917295	-0.430209	0.206	0.684	1
WDSUB1	non-TF	0.00158768	-0.431218	0.015	0.211	1
HEXIM1	non-TF	0.00882896	-0.431689	0.015	0.158	1
PGGT1B	non-TF	0.00851305	-0.431994	0.029	0.211	1	TRUE
LMAN2L	non-TF	0.00794494	-0.432003	0.029	0.211	1
NALCN	non-TF	0.00755924	-0.432742	0	0.105	1	TRUE
RIPK2	non-TF	0.000971555	-0.433498	0	0.158	1	TRUE
HPF1	non-TF	0.00160654	-0.435804	0.147	0.579	1
ACD	non-TF	0.00483349	-0.436171	0.044	0.263	1
CTSZ	non-TF	0.00812294	-0.436325	0.015	0.158	1	TRUE
LRMDA	non-TF	0.00131571	-0.436363	0.029	0.263	1	TRUE
COLGALT2	non-TF	0.002355	-0.43674	0.132	0.526	1
ZNF503	TF	0.00121827	-0.438422	0.015	0.211	1
TALDO1	non-TF	0.00949504	-0.438597	0.147	0.474	1
KTI12	non-TF	0.00755924	-0.439243	0	0.105	1
CELF2	non-TF	0.000971555	-0.439272	0	0.158	1
ACP1	non-TF	0.00894619	-0.440067	0.162	0.526	1	TRUE
QTRT1	non-TF	0.00158768	-0.441251	0.015	0.211	1
SKA2	non-TF	0.00845649	-0.44267	0.074	0.316	1
DTNB	non-TF	0.00111397	-0.443265	0.015	0.211	1
FBXL16	non-TF	0.00741102	-0.444152	0.029	0.211	1
ATP11A	non-TF	0.000971555	-0.444732	0	0.158	1
PHKG1	non-TF	0.00755924	-0.446114	0	0.105	1	TRUE
TMEM234	non-TF	0.000971555	-0.447806	0	0.158	1
FAM193A	non-TF	0.00851305	-0.448296	0.029	0.211	1
CALD1	non-TF	0.0014544	-0.44983	0.015	0.211	1
CMYA5	non-TF	0.00910975	-0.449952	0.147	0.474	1
UPF3A	non-TF	0.00449975	-0.451128	0.088	0.368	1
CNDP2	non-TF	0.00812294	-0.451439	0.015	0.158	1
MXI1	TF	0.00584335	-0.452736	0.044	0.263	1	TRUE
NUPR1	non-TF	0.000125102	-0.452746	0	0.211	1
CUL3	non-TF	0.00328087	-0.454568	0.059	0.316	1
AC093702.1	non-TF	0.000971555	-0.455281	0	0.158	1
METTL2A	non-TF	0.0064387	-0.455366	0.029	0.211	1
ARIH1	non-TF	0.00308972	-0.456249	0.059	0.316	1
ZNF445	TF	0.00794494	-0.456297	0.029	0.211	1
CHID1	non-TF	0.00437058	-0.458032	0.191	0.579	1
TIMM29	non-TF	0.00548736	-0.458336	0.044	0.263	1
MUC20-OT1	non-TF	0.00317754	-0.458496	0.103	0.421	1
PRSS36	non-TF	0.000971555	-0.459264	0	0.158	1
BLOC1S2	non-TF	0.00619493	-0.459364	0.162	0.526	1
QSOX1	non-TF	0.00515105	-0.460082	0.044	0.263	1
SMIM8	non-TF	0.00348274	-0.460407	0.059	0.316	1
SERF2	non-TF	0.00789828	-0.460467	0.912	0.947	1
ZNF567	TF	0.00152979	-0.462668	0.029	0.263	1
FOXO1	TF	0.0014544	-0.463121	0.015	0.211	1	TRUE
SCRG1	non-TF	0.00348274	-0.465178	0.059	0.316	1
RBM4B	non-TF	0.00158768	-0.465398	0.015	0.211	1
RFX1	TF	0.00392074	-0.46581	0.059	0.316	1
PIGV	non-TF	0.000971555	-0.466242	0	0.158	1
AL024508.2	non-TF	0.00755924	-0.466265	0	0.105	1
AVIL	non-TF	0.00755924	-0.466265	0	0.105	1
YIF1B	non-TF	0.00302066	-0.466651	0.103	0.421	1
LY6H	non-TF	0.00812294	-0.468649	0.015	0.158	1
LITAF	TF	0.00845649	-0.469613	0.074	0.316	1
SNX17	non-TF	0.00690951	-0.47217	0.029	0.211	1
CEP44	non-TF	0.00133151	-0.472779	0.015	0.211	1
IKZF5	TF	0.00958929	-0.475677	0.015	0.158	1
DLX5	TF	0.0055827	-0.475715	0.029	0.211	1
ZNF358	TF	0.00121827	-0.476602	0.015	0.211	1
MANSC4	non-TF	0.00133151	-0.477354	0.015	0.211	1
NMB	non-TF	0.00158768	-0.477544	0.015	0.211	1
C17orf67	non-TF	0.000125102	-0.478003	0	0.211	1
TUBB2A	non-TF	0.00958929	-0.480132	0.015	0.158	1	TRUE
MYOZ1	non-TF	0.000971555	-0.481435	0	0.158	1
RABEP1	non-TF	0.00891005	-0.481945	0.074	0.316	1	TRUE
TRIP6	non-TF	0.00958929	-0.482103	0.015	0.158	1
MOSPD3	non-TF	0.00515105	-0.486814	0.044	0.263	1
DNAJC15	non-TF	0.00308972	-0.487525	0.059	0.316	1
SYNE2	non-TF	0.00209677	-0.48876	0.074	0.368	1
ABHD11	non-TF	0.00197938	-0.488887	0.074	0.368	1
GALNT2	non-TF	0.000971555	-0.490055	0	0.158	1	TRUE
HRAS	non-TF	0.005464	-0.490585	0.103	0.421	1	TRUE
ATRNL1	non-TF	0.00690951	-0.492086	0.029	0.211	1
ZNF720	TF	0.00133151	-0.492119	0.015	0.211	1
OR7C1	non-TF	0.000971555	-0.49242	0	0.158	1
MICALL2	non-TF	0.000971555	-0.492481	0	0.158	1
SP3	TF	0.000971555	-0.492678	0	0.158	1	TRUE
SIK2	non-TF	0.00958929	-0.493259	0.015	0.158	1	TRUE
SIRT7	non-TF	0.00158768	-0.494656	0.015	0.211	1
SOX10	TF	1.58162e-05	-0.495061	0	0.263	0.239773	TRUE
FAM98C	non-TF	0.00483349	-0.496758	0.044	0.263	1
EFEMP2	non-TF	0.000125102	-0.49789	0	0.211	1
PER2	non-TF	0.0014544	-0.499045	0.015	0.211	1
FXYD1	non-TF	0.00373279	-0.499657	0.044	0.263	1
MAPT	non-TF	0.00121827	-0.500137	0.015	0.211	1	TRUE
LGMN	non-TF	0.000125102	-0.500604	0	0.211	1	TRUE
PPP4R2	non-TF	0.00548736	-0.501113	0.044	0.263	1
ITM2C	non-TF	0.000504381	-0.502121	0.059	0.368	1
ID2	TF	0.000125102	-0.504063	0	0.211	1
SLC22A17	non-TF	0.00525248	-0.504318	0.088	0.368	1
DSEL	non-TF	0.00812294	-0.504486	0.015	0.158	1
C2orf15	non-TF	0.00958929	-0.505532	0.015	0.158	1
IZUMO4	non-TF	0.00755924	-0.505846	0	0.105	1
REEP6	non-TF	0.000971555	-0.506287	0	0.158	1
SMIM29	non-TF	0.000168783	-0.507912	0.059	0.421	1
MREG	non-TF	0.00958929	-0.508152	0.015	0.158	1
S100A4	non-TF	0.00599695	-0.508714	0.029	0.211	1	TRUE
CYP46A1	non-TF	0.000971555	-0.508919	0	0.158	1	TRUE
ATG3	non-TF	0.00334182	-0.509054	0.103	0.421	1
PLIN3	non-TF	0.000125102	-0.509746	0	0.211	1	TRUE
SHC4	non-TF	0.00121937	-0.511017	0.029	0.263	1
CCNC	non-TF	0.00755924	-0.511057	0	0.105	1
PLA2G6	non-TF	0.000125102	-0.51137	0	0.211	1	TRUE
SRGAP1	non-TF	0.00151601	-0.512771	0.088	0.421	1
PREPL	non-TF	0.00278535	-0.514009	0.074	0.368	1
KLF3	TF	0.00121937	-0.514027	0.029	0.263	1
NMNAT1	non-TF	0.00755924	-0.515705	0	0.105	1
PPP1R9A	non-TF	0.00515105	-0.515776	0.044	0.263	1
MCOLN3	non-TF	0.000971555	-0.516072	0	0.158	1	TRUE
AC124066.1	non-TF	0.00755924	-0.51681	0	0.105	1
RNF130	non-TF	0.00186804	-0.517699	0.074	0.368	1
HIGD1A	non-TF	0.000157581	-0.518056	0.059	0.421	1
MGAT1	non-TF	0.00755924	-0.518506	0	0.105	1
WBP4	non-TF	0.00450063	-0.519141	0.103	0.421	1
TBC1D13	non-TF	0.000234449	-0.519695	0.029	0.316	1
ENO1	non-TF	0.00266795	-0.520116	0.147	0.526	1
BCL7A	non-TF	0.00906628	-0.52028	0.103	0.368	1
GRIA3	non-TF	0.00152979	-0.520345	0.029	0.263	1	TRUE
FDX2	non-TF	0.000209889	-0.520869	0.015	0.263	1
MFSD2A	non-TF	0.0010204	-0.521231	0.044	0.316	1
NOL9	non-TF	0.00958929	-0.523157	0.015	0.158	1
ADH5	non-TF	0.000185672	-0.526606	0.044	0.368	1
IFI27	non-TF	0.00552759	-0.527824	0.088	0.368	1	TRUE
ILK	non-TF	0.000234449	-0.528718	0.029	0.316	1	TRUE
IQCK	non-TF	0.00552759	-0.528775	0.088	0.368	1
SPRY1	non-TF	0.000183905	-0.529216	0.029	0.316	1
KRT19	non-TF	0.000849688	-0.529269	0.059	0.368	1	TRUE
TFG	non-TF	0.00995827	-0.531278	0.118	0.421	1
PLEKHM2	non-TF	0.00958929	-0.531887	0.015	0.158	1
NDRG1	non-TF	1.58162e-05	-0.533378	0	0.263	0.239773
RPL28	non-TF	0.00140737	-0.534647	0.838	1	1
SVIP	non-TF	0.00771392	-0.534752	0.309	0.737	1
DNAH6	non-TF	0.000971555	-0.536664	0	0.158	1
C2orf76	non-TF	0.00131571	-0.536976	0.029	0.263	1
PEBP4	non-TF	0.00104593	-0.537071	0.029	0.263	1	TRUE
SREBF1	TF	0.000128029	-0.538149	0.059	0.421	1	TRUE
FTX	non-TF	0.00552703	-0.538735	0.088	0.368	1
AKAP11	non-TF	0.000971555	-0.539518	0	0.158	1
CYFIP2	non-TF	0.00741102	-0.541003	0.029	0.211	1
TUSC3	non-TF	0.00515105	-0.543945	0.044	0.263	1
DIRAS3	non-TF	0.000230126	-0.544825	0.015	0.263	1
UBE2V2	non-TF	0.000383845	-0.545464	0.088	0.474	1
RPS9	non-TF	0.00146655	-0.545865	0.75	1	1
KREMEN1	non-TF	0.000445274	-0.545986	0.074	0.421	1
LMF2	non-TF	0.0055827	-0.547794	0.029	0.211	1
P2RX6	non-TF	0.00882896	-0.548276	0.015	0.158	1
SH3D19	non-TF	0.000971555	-0.548339	0	0.158	1
RCN2	non-TF	0.00116915	-0.549671	0.103	0.474	1
SASH1	non-TF	0.000971555	-0.549814	0	0.158	1
TNR	non-TF	0.00958929	-0.550092	0.015	0.158	1
C14orf119	non-TF	0.00525248	-0.552518	0.088	0.368	1
SLC52A2	non-TF	0.00515105	-0.553131	0.044	0.263	1
RPL12	non-TF	0.00313925	-0.55361	0.941	1	1
GDE1	non-TF	0.00958929	-0.554402	0.015	0.158	1
ARPC3	non-TF	0.00974765	-0.55625	0.279	0.684	1
EMD	non-TF	0.0010204	-0.556408	0.044	0.316	1
SELENOP	non-TF	0.000230126	-0.556673	0.015	0.263	1
CD81	non-TF	0.0099214	-0.556788	0.471	0.737	1
HEY1	TF	0.000156109	-0.557464	0.029	0.316	1
CCDC80	non-TF	0.00398422	-0.557586	0.044	0.263	1
MIRLET7BHG	non-TF	0.00958929	-0.557684	0.015	0.158	1
AC087190.1	non-TF	0.00958929	-0.559812	0.015	0.158	1
ABCB8	non-TF	0.00741102	-0.560399	0.029	0.211	1
NOC2L	non-TF	0.000254012	-0.5607	0.029	0.316	1
PHYHD1	non-TF	0.00121827	-0.564002	0.015	0.211	1
SF3B5	non-TF	0.00432207	-0.565381	0.25	0.684	1
LRP10	non-TF	0.00214083	-0.56666	0.059	0.316	1
ZNRF2	non-TF	0.000971555	-0.567232	0	0.158	1
VAMP8	non-TF	0.00945321	-0.568659	0.221	0.579	1
IST1	non-TF	0.00273755	-0.570018	0.059	0.316	1
MSRB2	non-TF	0.00982754	-0.572612	0.382	0.895	1
OTOS	non-TF	0.000125102	-0.572649	0	0.211	1	TRUE
SH3BGRL	non-TF	0.00121827	-0.572845	0.015	0.211	1
NQO2	non-TF	0.000185672	-0.573437	0.044	0.368	1	TRUE
PLP1	non-TF	0.0055827	-0.573719	0.029	0.211	1
ODR4	non-TF	0.000230126	-0.574703	0.015	0.263	1
NUBP2	non-TF	0.000230126	-0.575391	0.015	0.263	1
RAD21	non-TF	0.00388212	-0.578554	0.103	0.421	1	TRUE
CRELD1	non-TF	0.000119399	-0.580346	0.059	0.421	1
FGFR1	non-TF	0.000191333	-0.581741	0.015	0.263	1	TRUE
ZNF680	TF	0.000971555	-0.585284	0	0.158	1
AC092053.3	non-TF	0.00755924	-0.585706	0	0.105	1
GNA14	non-TF	0.00755924	-0.585706	0	0.105	1
NEDD4L	non-TF	0.000813246	-0.586705	0.088	0.421	1	TRUE
RPS21	non-TF	0.00857532	-0.587855	0.382	0.842	1
SPINT1-AS1	non-TF	0.00113344	-0.58896	0.191	0.684	1
AC104187.1	non-TF	0.000971555	-0.589893	0	0.158	1
COX7A1	non-TF	0.000209889	-0.590005	0.015	0.263	1
ZFP36L1	TF	0.000209889	-0.590145	0.015	0.263	1
NR4A1	TF	0.00121937	-0.590851	0.029	0.263	1	TRUE
TAF7	non-TF	0.00397648	-0.591031	0.176	0.579	1
UVSSA	non-TF	0.00958929	-0.591085	0.015	0.158	1
WASF2	non-TF	0.00135665	-0.593575	0.088	0.421	1
PAF1	non-TF	0.000971555	-0.593598	0	0.158	1
ZFP36L2	TF	0.00015875	-0.594232	0.015	0.263	1	TRUE
DYNLRB1	non-TF	0.00379858	-0.594843	0.338	0.842	1
TSIX	non-TF	0.00741102	-0.598257	0.029	0.211	1
AL354707.1	non-TF	0.00755924	-0.598294	0	0.105	1
KCNB1	non-TF	0.00158768	-0.598539	0.015	0.211	1	TRUE
PTPRF	non-TF	1.58162e-05	-0.598952	0	0.263	0.239773	TRUE
NME4	non-TF	0.00156765	-0.599869	0.074	0.368	1
ADI1	non-TF	0.00664518	-0.601811	0.118	0.421	1
SAMD14	non-TF	0.00741102	-0.602561	0.029	0.211	1
AMN1	non-TF	0.000216307	-0.603148	0.029	0.316	1
SHISA3	non-TF	0.00133151	-0.604293	0.015	0.211	1
MAP3K20	non-TF	3.18309e-05	-0.604358	0.015	0.316	0.482557	TRUE
LINC01549	non-TF	0.000185672	-0.605863	0.044	0.368	1
CCNI	non-TF	0.00181905	-0.606125	0.926	1	1
AC245297.3	non-TF	0.00599695	-0.60686	0.029	0.211	1
COL11A2	non-TF	0.004158	-0.607471	0.059	0.316	1	TRUE
ZCWPW1	non-TF	0.000971555	-0.60874	0	0.158	1
CCDC34	non-TF	0.00392074	-0.609088	0.059	0.316	1
RASGRP1	non-TF	1.58162e-05	-0.615354	0	0.263	0.239773	TRUE
RNF11	non-TF	0.00483349	-0.615471	0.044	0.263	1
BOC	non-TF	0.000121724	-0.617433	0.029	0.316	1
THAP5	TF	0.00317754	-0.61842	0.103	0.421	1
RPL7	non-TF	0.000484465	-0.618441	0.882	1	1
ZBTB7B	TF	0.000971555	-0.61877	0	0.158	1
GADD45B	non-TF	0.000174327	-0.618783	0.015	0.263	1
TMEM79	non-TF	0.00741102	-0.62016	0.029	0.211	1
PPP1R8	non-TF	0.00121827	-0.622292	0.015	0.211	1
GSTT2B	non-TF	0.000575652	-0.622631	0.059	0.368	1
ZBTB7A	TF	0.00489575	-0.623448	0.176	0.579	1
ENDOG	non-TF	0.00690951	-0.623833	0.029	0.211	1
TSPAN8	non-TF	0.00125301	-0.624774	0.044	0.316	1
COL2A1	non-TF	0.000148597	-0.626129	0.044	0.368	1	TRUE
HDDC2	non-TF	0.00257559	-0.626516	0.059	0.316	1
LINC01571	non-TF	0.00125301	-0.627827	0.044	0.316	1
EPHX1	non-TF	0.00906628	-0.628775	0.103	0.368	1	TRUE
GON7	non-TF	0.00210877	-0.629373	0.162	0.579	1
TPRKB	non-TF	0.000392889	-0.63173	0.074	0.421	1
AMZ2	non-TF	0.00721712	-0.631738	0.074	0.316	1
EIPR1	non-TF	0.00578479	-0.632066	0.118	0.421	1
RNASET2	non-TF	0.00425093	-0.632101	0.044	0.263	1
AL354733.3	non-TF	0.00483349	-0.634824	0.044	0.263	1
DDX10	non-TF	0.00133151	-0.634914	0.015	0.211	1
RPS15A	non-TF	0.000715678	-0.637036	0.779	1	1
FAM3C	non-TF	0.00166245	-0.63842	0.074	0.368	1
EFHC1	non-TF	0.00193888	-0.638468	0.191	0.632	1
BTG3	non-TF	0.000191333	-0.639428	0.015	0.263	1
RRAGA	non-TF	0.0056922	-0.64409	0.176	0.526	1
ATG4A	non-TF	0.00958929	-0.644714	0.015	0.158	1
HMGB1	TF	0.00154918	-0.644871	0.735	0.947	1	TRUE
IRAK4	non-TF	0.000670261	-0.644877	0.044	0.316	1	TRUE
SART3	non-TF	0.00599695	-0.64678	0.029	0.211	1
MPHOSPH6	non-TF	0.00192037	-0.646844	0.221	0.684	1
SERPINE2	non-TF	0.00112958	-0.646978	0.029	0.263	1
POGK	non-TF	0.000230126	-0.647425	0.015	0.263	1
TMEM134	non-TF	0.00494737	-0.647725	0.279	0.684	1
AC009779.2	non-TF	1.58162e-05	-0.649348	0	0.263	0.239773
UBQLN4	non-TF	0.00958929	-0.649637	0.015	0.158	1
LRRC47	non-TF	0.0064387	-0.65039	0.029	0.211	1
BMPR1B-DT	non-TF	0.000971555	-0.653498	0	0.158	1
AL390719.2	non-TF	0.000971555	-0.653777	0	0.158	1
RETREG1	non-TF	0.000432919	-0.655604	0.118	0.526	1
RTN4	non-TF	0.00868566	-0.660298	0.338	0.789	1	TRUE
HHATL	non-TF	0.000128029	-0.66064	0.059	0.421	1
CRYL1	non-TF	0.00427146	-0.661502	0.088	0.368	1
FAM174B	non-TF	0.000191333	-0.666564	0.015	0.263	1
TMEM128	non-TF	0.000383845	-0.667782	0.088	0.474	1
MID1	non-TF	0.000971555	-0.668139	0	0.158	1	TRUE
SSR2	non-TF	0.00279275	-0.668573	0.147	0.526	1
SRPK2	non-TF	0.0003681	-0.668982	0.162	0.632	1	TRUE
LRRC73	non-TF	0.00803623	-0.671302	0.147	0.474	1
GAPVD1	non-TF	0.0010204	-0.672233	0.044	0.316	1	TRUE
MCTS1	non-TF	0.00906628	-0.672301	0.103	0.368	1
SPSB3	non-TF	0.000111319	-0.673379	0.059	0.421	1
RFLNB	non-TF	0.000199852	-0.673551	0.044	0.368	1
FGD5-AS1	non-TF	0.000346308	-0.673751	0.074	0.421	1
FAM104B	non-TF	0.000677927	-0.674194	0.103	0.474	1
RTKN2	non-TF	0.000971555	-0.675349	0	0.158	1	TRUE
ORMDL2	non-TF	0.0078671	-0.679436	0.103	0.368	1
PNISR	non-TF	0.000529992	-0.679647	0.206	0.684	1
SPATS2L	non-TF	0.0003879	-0.680802	0.118	0.526	1
NEFM	non-TF	0.00995388	-0.688825	0.103	0.368	1
SELENOT	non-TF	0.00386187	-0.689051	0.191	0.579	1
PFN1	non-TF	0.00449975	-0.689453	0.088	0.368	1
PSMD6	non-TF	0.0027279	-0.694309	0.103	0.421	1	TRUE
EEF1AKMT1	non-TF	3.15623e-06	-0.695521	0.074	0.579	0.0478484
MACO1	non-TF	0.000216307	-0.695573	0.029	0.316	1
TM2D2	non-TF	2.49028e-05	-0.699001	0.059	0.474	0.377526
TXNDC9	non-TF	0.00119386	-0.702745	0.132	0.526	1
IMP3	non-TF	0.00191676	-0.702908	0.206	0.632	1
ARID5B	TF	0.000971555	-0.704097	0	0.158	1	TRUE
B3GNT10	non-TF	0.000246515	-0.705331	0.103	0.526	1
MANBAL	non-TF	0.00109308	-0.707639	0.044	0.316	1
TES	non-TF	0.00384611	-0.708025	0.088	0.368	1
PLEKHJ1	non-TF	0.00166245	-0.708448	0.074	0.368	1	TRUE
EPCAM	non-TF	0.00203269	-0.709212	0.5	0.895	1	TRUE
NOP53	non-TF	0.0002097	-0.709692	0.088	0.474	1
CALR	non-TF	0.0032015	-0.711103	0.441	0.842	1	TRUE
RPS4X	non-TF	6.3245e-06	-0.711145	0.971	1	0.0958794
ARG2	non-TF	1.58162e-05	-0.711728	0	0.263	0.239773	TRUE
TUBB2B	non-TF	0.000156109	-0.712527	0.029	0.316	1	TRUE
PLA2G4E	non-TF	0.00141903	-0.713571	0.029	0.263	1
RAB6B	non-TF	0.000125102	-0.717577	0	0.211	1
RBP1	non-TF	0.00946375	-0.718891	0.059	0.263	1
EEF1D	non-TF	0.00840083	-0.719765	0.353	0.737	1
UBE2A	non-TF	0.000284531	-0.720165	0.088	0.474	1
SH3BGRL3	non-TF	0.00841239	-0.720806	0.191	0.526	1
TMEM14A	non-TF	0.00139282	-0.721068	0.074	0.368	1
GJB6	non-TF	0.000580989	-0.723376	0.044	0.316	1	TRUE
MNAT1	non-TF	5.74978e-06	-0.725359	0.029	0.421	0.0871667
ATXN10	non-TF	0.00263232	-0.729161	0.221	0.632	1
ARFGEF1	non-TF	0.00053892	-0.730194	0.059	0.368	1
MOB1A	non-TF	0.00133151	-0.731083	0.015	0.211	1
ARMC9	non-TF	0.000209889	-0.73127	0.015	0.263	1
WASHC3	non-TF	0.00453374	-0.731604	0.044	0.263	1
MINDY4B	non-TF	0.00397197	-0.732614	0.765	1	1
TIMP1	non-TF	0.00545144	-0.733931	0.485	0.842	1
DPYSL2	non-TF	0.00764218	-0.733945	0.206	0.526	1	TRUE
LYG2	non-TF	0.00121827	-0.734156	0.015	0.211	1
FRZB	non-TF	0.000174327	-0.734732	0.015	0.263	1
NRBP1	non-TF	0.000148597	-0.734788	0.044	0.368	1
SH3BGR	non-TF	0.000275642	-0.737437	0.221	0.737	1
AC079354.1	non-TF	0.0014544	-0.737958	0.015	0.211	1
PRR34-AS1	non-TF	0.000558079	-0.738695	0.162	0.579	1
TBX2	TF	0.00328297	-0.741977	0.176	0.526	1	TRUE
SMIM7	non-TF	0.00166171	-0.742866	0.176	0.579	1
OXR1	non-TF	0.000772151	-0.744523	0.044	0.316	1
ANAPC13	non-TF	0.000464559	-0.745537	0.368	1	1
PTPN11	non-TF	0.00086166	-0.746712	0.088	0.421	1	TRUE
PAPSS1	non-TF	0.00102341	-0.747969	0.088	0.421	1
SSR3	non-TF	0.000161106	-0.749111	0.118	0.579	1
RPSA	non-TF	0.00212802	-0.750368	0.25	0.684	1	TRUE
AL357093.2	non-TF	0.000971555	-0.750509	0	0.158	1
EFCAB14	non-TF	0.00999857	-0.75138	0.147	0.421	1
PSD3	non-TF	0.00882896	-0.754238	0.015	0.158	1
REEP5	non-TF	0.000731451	-0.754424	0.353	0.895	1	TRUE
PRKAG1	non-TF	0.000199489	-0.756115	0.029	0.316	1	TRUE
NOSIP	non-TF	0.00400286	-0.757005	0.147	0.474	1
DCTD	non-TF	0.000174327	-0.757107	0.015	0.263	1	TRUE
KATNBL1	non-TF	1.58162e-05	-0.758612	0	0.263	0.239773
AC009041.2	non-TF	0.000575652	-0.759419	0.059	0.368	1
SPARC	non-TF	0.000136461	-0.760661	0.147	0.632	1	TRUE
TST	non-TF	0.000928293	-0.761347	0.132	0.526	1
MRPL32	non-TF	0.00427146	-0.762686	0.088	0.368	1
SDHAF3	non-TF	0.000723898	-0.765536	0.088	0.421	1
PI4KA	non-TF	0.00131571	-0.766604	0.029	0.263	1	TRUE
TOMM22	non-TF	0.000955864	-0.76719	0.162	0.579	1
PSMB4	non-TF	0.000614711	-0.767472	0.235	0.789	1	TRUE
PRDX4	non-TF	0.00417323	-0.767905	0.338	0.737	1	TRUE
DNAJC1	TF	0.000392889	-0.769821	0.074	0.421	1
NHP2	non-TF	0.00126281	-0.770748	0.176	0.579	1
AES	non-TF	0.000302228	-0.772347	0.088	0.474	1
WNT2B	non-TF	0.00755924	-0.773974	0	0.105	1
XBP1	TF	0.00186804	-0.77417	0.074	0.368	1	TRUE
MPZL2	non-TF	0.000670261	-0.775334	0.044	0.316	1
ELFN1	non-TF	1.9435e-06	-0.775506	0	0.316	0.0294635
TMEM101	non-TF	0.000191333	-0.776799	0.015	0.263	1
ATP5F1C	non-TF	0.0038361	-0.780192	0.294	0.684	1
RPS17	non-TF	0.000136461	-0.780638	0.147	0.632	1
RRBP1	non-TF	0.00132247	-0.780876	0.176	0.579	1
LMBRD1	non-TF	0.00147786	-0.786263	0.074	0.368	1
ARMC8	non-TF	3.32787e-05	-0.788757	0.029	0.368	0.504505
RAD50	non-TF	0.00755924	-0.792117	0	0.105	1	TRUE
KCNS3	non-TF	1.58162e-05	-0.7928	0	0.263	0.239773	TRUE
NFIX	TF	0.00086166	-0.793935	0.088	0.421	1
PNO1	non-TF	0.000418317	-0.794352	0.074	0.421	1
LYPD1	non-TF	0.000719532	-0.794898	0.044	0.316	1
ENHO	non-TF	0.00946375	-0.797076	0.059	0.263	1
AC010261.2	non-TF	0.00133151	-0.798108	0.015	0.211	1
AC025244.1	non-TF	5.31083e-07	-0.801628	0.015	0.421	0.00805121
NDUFA4L2	non-TF	0.000125102	-0.803098	0	0.211	1	TRUE
CRYM	non-TF	0.000125102	-0.807596	0	0.211	1
HLA-DRA	non-TF	0.00479403	-0.80969	0.118	0.421	1	TRUE
PLPP2	non-TF	0.000132302	-0.810614	0.029	0.316	1
MECR	non-TF	0.000828323	-0.811253	0.044	0.316	1
ATN1	non-TF	0.00144967	-0.811253	0.176	0.579	1
C2orf74	non-TF	0.00167231	-0.814165	0.147	0.526	1
LINC01198	non-TF	0.000828151	-0.819458	0.029	0.263	1
ARL2BP	non-TF	0.000718619	-0.819623	0.191	0.632	1
CD24	non-TF	0.00290878	-0.820693	0.059	0.316	1
NUPR2	non-TF	0.00014449	-0.824481	0.015	0.263	1
MRPL27	non-TF	0.000367068	-0.824985	0.118	0.526	1
PDE6D	non-TF	0.00176249	-0.82603	0.074	0.368	1	TRUE
COX20	non-TF	0.00300643	-0.827554	0.456	0.895	1
LARP7	non-TF	0.000750373	-0.827983	0.162	0.579	1
PMEPA1	non-TF	1.58162e-05	-0.834746	0	0.263	0.239773
PABPC1	non-TF	0.00105323	-0.837018	0.235	0.684	1	TRUE
ZNF385B	TF	2.30711e-07	-0.840856	0	0.368	0.00349758
FBXO32	non-TF	0.000128029	-0.843728	0.059	0.421	1
NMT1	non-TF	0.000641203	-0.848637	0.103	0.474	1
GLUL	non-TF	0.000109912	-0.849182	0.044	0.368	1
ARF1	non-TF	0.00631734	-0.850006	0.132	0.421	1
COMMD9	non-TF	0.00214083	-0.851313	0.059	0.316	1
SEC14L1	non-TF	7.13712e-06	-0.852614	0.088	0.579	0.108199
CCT2	non-TF	0.000263265	-0.856051	0.338	0.842	1
ORAI2	non-TF	0.000340757	-0.857704	0.088	0.474	1	TRUE
CMTM5	non-TF	0.000255839	-0.870032	0.059	0.368	1
SPHK1	non-TF	3.941e-05	-0.871763	0.029	0.368	0.597456	TRUE
PKM	non-TF	0.00131019	-0.872115	0.235	0.632	1	TRUE
SELENOM	non-TF	0.000158816	-0.873622	0.5	1	1
ZNF428	non-TF	0.000820876	-0.87377	0.279	0.789	1
PSMD5	non-TF	0.00755924	-0.876823	0	0.105	1	TRUE
POLDIP2	non-TF	5.31083e-07	-0.878871	0.015	0.421	0.00805121
LINC00393	non-TF	0.000125102	-0.879596	0	0.211	1
CEBPZOS	non-TF	4.55581e-06	-0.881339	0.044	0.474	0.069066
NFIA	TF	0.000497652	-0.882214	0.103	0.474	1
S100A13	non-TF	1.20859e-06	-0.888366	1	1	0.0183222
GNG5	non-TF	0.000483772	-0.890936	0.103	0.474	1
KLHL4	non-TF	0.000774915	-0.894188	0.118	0.474	1
CHORDC1	non-TF	0.00550969	-0.897471	0.074	0.316	1
REST	TF	4.19651e-06	-0.901621	0.044	0.474	0.063619
FBXO2	non-TF	2.0593e-05	-0.908602	1	1	0.31219
PQBP1	non-TF	2.80159e-05	-0.912397	0.088	0.526	0.424721
SPTSSA	non-TF	0.00250256	-0.91651	0.088	0.368	1
CBR1	non-TF	0.000407466	-0.921405	0.103	0.474	1	TRUE
HERPUD1	non-TF	0.00100007	-0.933342	0.176	0.579	1
TTYH1	non-TF	1.30572e-05	-0.939987	0.044	0.421	0.197947
CCER2	non-TF	1.58162e-05	-0.940643	0	0.263	0.239773
DLK2	non-TF	0.000199489	-0.956345	0.029	0.316	1
NMNAT3	non-TF	1.58162e-05	-0.963224	0	0.263	0.239773
PRR15	non-TF	0.00172331	-0.964586	0.162	0.526	1
KCNQ1OT1	non-TF	0.000670261	-0.964867	0.044	0.316	1
LINC02570	non-TF	0.00014449	-0.966161	0.015	0.263	1
MARCH2	non-TF	0.00144563	-0.966947	0.132	0.474	1
FAM69C	non-TF	4.79934e-07	-0.96794	0.015	0.421	0.0072758
C2orf80	non-TF	0.000232855	-0.986834	0.265	0.789	1
SRPRA	non-TF	4.55536e-07	-0.991812	0.029	0.474	0.00690593
CLDN3	non-TF	0.000719532	-0.991966	0.044	0.316	1
CEBPD	TF	1.20359e-05	-1.00037	0.044	0.421	0.182464
SCG5	non-TF	0.000386659	-1.01005	0.485	0.947	1	TRUE
MCEE	non-TF	2.38628e-05	-1.01979	0.015	0.316	0.36176
TOP2A	non-TF	3.86445e-06	-1.02135	0.044	0.474	0.0585851	TRUE
C4orf48	non-TF	0.000483772	-1.02502	0.103	0.474	1
SRI	non-TF	0.000164832	-1.02612	0.706	1	1	TRUE
OSBPL6	non-TF	0.000137874	-1.02831	0.044	0.368	1
RPA2	non-TF	1.59555e-05	-1.05085	0.059	0.474	0.241885
MIR4458HG	non-TF	9.4883e-05	-1.05295	0.103	0.526	1
TMEM205	non-TF	0.000144454	-1.05524	0.353	0.895	1
AC022182.2	non-TF	0.000116386	-1.05657	0.206	0.684	1
SCNN1A	non-TF	2.62801e-05	-1.05726	0.015	0.316	0.398407	TRUE
ALDH1A1	non-TF	2.31399e-06	-1.05751	0.015	0.368	0.0350801	TRUE
S100B	non-TF	0.000101847	-1.05965	0.044	0.368	1	TRUE
CNN3	non-TF	1.16808e-05	-1.06563	0.118	0.632	0.177081
JUNB	TF	0.0028098	-1.06655	0.118	0.421	1	TRUE
ANXA2	non-TF	0.000970441	-1.06959	0.074	0.368	1	TRUE
TPD52L1	non-TF	2.81626e-06	-1.07211	0.029	0.421	0.0426945
IFI6	non-TF	1.83691e-05	-1.08973	0.132	0.632	0.278475
AGR3	non-TF	0.000348364	-1.09547	0.044	0.316	1
PRSS23	non-TF	0.000590785	-1.10099	0.118	0.474	1
TMSB4X	non-TF	0.000360567	-1.10281	0.059	0.368	1
S100A10	non-TF	0.000147082	-1.11213	0.059	0.421	1	TRUE
ALDH2	non-TF	5.99731e-06	-1.11821	0.074	0.526	0.0909192	TRUE
CTGF	non-TF	4.8197e-06	-1.12012	0.029	0.421	0.0730666
TSPAN3	non-TF	0.00108985	-1.12222	0.382	0.789	1
SLC1A3	non-TF	3.08061e-07	-1.14419	0.044	0.526	0.0046702	TRUE
KRT18	non-TF	0.00086166	-1.14779	0.088	0.421	1	TRUE
MIR29B2CHG	non-TF	2.16681e-05	-1.15267	0.029	0.368	0.328488
ARL5A	non-TF	1.09555e-05	-1.15855	0.118	0.632	0.166086
PAQR6	non-TF	5.37317e-05	-1.18151	0.074	0.474	0.814572
ITM2B	non-TF	0.000893842	-1.18335	0.662	0.895	1
CDK5RAP2	non-TF	1.37395e-06	-1.18337	0.162	0.789	0.020829
S100A11	non-TF	0.000682728	-1.1871	0.088	0.421	1
MORC1	non-TF	2.63473e-08	-1.18942	0	0.421	0.000399425
IDH1	non-TF	0.000325005	-1.20942	0.074	0.421	1	TRUE
SCG3	non-TF	8.07479e-06	-1.21094	0.529	1	0.122414
TMEM14C	non-TF	1.11826e-05	-1.21223	0.25	0.842	0.169529
SYNRG	non-TF	4.05995e-06	-1.24839	0.088	0.579	0.0615488
OTOF	non-TF	0.00018444	-1.25766	0.456	0.947	1
FXYD3	non-TF	9.99765e-06	-1.2631	0.074	0.526	0.151564
CRIP2	non-TF	2.47717e-05	-1.26431	0.206	0.737	0.375538
PPP2R2B	non-TF	1.18894e-05	-1.27382	0.147	0.632	0.180243
GFAP	non-TF	0.000206883	-1.30209	0.074	0.421	1	TRUE
CTHRC1	non-TF	1.8031e-05	-1.30445	0.044	0.421	0.27335
ATP6V0E1	non-TF	8.47478e-05	-1.30875	0.397	0.842	1
COL9A3	non-TF	0.00128925	-1.35488	0.059	0.316	1
TBX2-AS1	non-TF	1.76662e-06	-1.35838	0.265	0.895	0.0267819
VIM	non-TF	0.000507594	-1.38336	0.088	0.421	1	TRUE
ID4	TF	0.000169273	-1.39973	0.265	0.684	1
CST3	non-TF	8.82465e-08	-1.40646	0.882	1	0.00133782	TRUE
ID1	TF	0.00106618	-1.41049	0.132	0.474	1
SNORC	non-TF	0.00101273	-1.42687	0.132	0.474	1
KCNH6	non-TF	2.63473e-08	-1.45125	0	0.421	0.000399425	TRUE
S100A6	non-TF	0.000238868	-1.46128	0.206	0.632	1
FAM107A	non-TF	3.57106e-06	-1.46256	0.221	0.789	0.0541373
MDK	non-TF	1.81701e-06	-1.48535	0.044	0.474	0.0275458	TRUE
USH1C	non-TF	2.29087e-07	-1.51569	0.353	0.947	0.00347297
CHRNA1	non-TF	3.0225e-11	-1.52421	0	0.579	4.58211e-07	TRUE
ID3	TF	1.18298e-06	-1.53243	0.044	0.474	0.017934
IGFBP7	non-TF	1.23405e-05	-1.54505	0.088	0.526	0.187082
AGR2	non-TF	0.000389364	-1.5609	0.147	0.526	1
OTOL1	non-TF	2.2892e-05	-1.60647	0.088	0.526	0.347043
OTOG	non-TF	0.000400581	-1.62376	0.118	0.474	1
SEPT11	non-TF	1.96819e-11	-1.63782	0.044	0.737	2.98377e-07
LDHB	non-TF	9.47911e-08	-1.68482	0.426	1	0.00143703
MIR200CHG	non-TF	2.80412e-06	-1.69042	0.279	0.895	0.0425105
STAU2	non-TF	5.02994e-06	-1.72293	0.059	0.474	0.076254
B2M	non-TF	2.56697e-08	-1.75557	0.471	1	0.000389152	TRUE
CD9	non-TF	6.94827e-06	-1.83042	0.074	0.526	0.105336	TRUE
GNAS	non-TF	1.45658e-09	-1.94595	0.279	0.947	2.20817e-05	TRUE
MIA	non-TF	0.000723429	-1.95691	0.162	0.526	1	TRUE
PTN	non-TF	2.07649e-05	-2.10278	0.118	0.579	0.314795
HTRA1	non-TF	2.0497e-12	-2.10745	0.044	0.789	3.10734e-08	TRUE
SPARCL1	non-TF	4.40529e-05	-2.14705	0.118	0.526	0.667842
SOX2	TF	9.6081e-12	-2.37335	0.044	0.737	1.45659e-07
CSRP2	non-TF	2.34441e-14	-2.62647	0.059	0.895	3.55412e-10
NPY	non-TF	1.58162e-05	-2.76803	0	0.263	0.239773	TRUE
CALB1	non-TF	4.34634e-18	-4.83145	0.015	0.947	6.58906e-14
CXCL14	non-TF	4.7081e-17	-5.97292	0.074	1	7.13748e-13

## Sheet: Table S3. SC vs SCLC
Table S3. Gene expression enriched in supporting cells (SC) or supporting cell-like cells (SCLC) clusters from an untreated utricle (scUntr-2). Related to Figure 5b.
Transcription factors (TF) were detected using AnimalTFDB 3.0, druggable genes using DGIdb 4.0.
Gene	TF	p_val	avg_log2FC	pct.1	pct.2	p_val_adj	Drug
ANKRD1	non-TF	9.00268e-83	-3.17159	0.001	0.459	1.36481e-78
KRT7	non-TF	1.6301e-62	-2.42869	0.006	0.432	2.47123e-58
CRYAB	non-TF	4.03716e-31	-5.48849	0.282	0.946	6.12034e-27
IL32	non-TF	1.07356e-26	-0.936337	0	0.135	1.62751e-22
SFRP4	non-TF	5.29027e-23	-1.15365	0.005	0.189	8.02005e-19
S100A11	non-TF	4.78291e-17	-1.67301	0.739	1	7.25089e-13
VIM	non-TF	1.52776e-16	-2.15393	0.747	1	2.31609e-12	TRUE
FBLN5	non-TF	1.8338e-16	-0.541829	0.004	0.135	2.78005e-12
IGFBP2	non-TF	1.96108e-16	-0.992085	0.004	0.135	2.973e-12
ANXA1	non-TF	2.4506e-14	-0.7013	0.002	0.108	3.71511e-10	TRUE
LGALS3	non-TF	2.73846e-14	-1.85531	0.166	0.622	4.15151e-10	TRUE
OTOL1	non-TF	5.97165e-13	3.05475	0.784	0.135	9.05302e-09
S100A6	non-TF	1.17639e-12	-1.95691	0.934	1	1.7834e-08
SKP1	non-TF	8.87217e-12	0.718611	0.993	1	1.34502e-07
RRAS	non-TF	1.58458e-11	-0.849484	0.023	0.216	2.40223e-07
CTSV	non-TF	3.15967e-11	-1.53393	0.018	0.189	4.79006e-07	TRUE
BRICD5	non-TF	4.50864e-11	1.91175	0.785	0.378	6.8351e-07
WFDC2	non-TF	2.2292e-10	-1.47638	0.626	0.946	3.37946e-06
CNMD	non-TF	2.34398e-10	-1.15462	0.04	0.27	3.55347e-06
TNFRSF12A	non-TF	4.32371e-10	-1.88557	0.178	0.541	6.55475e-06	TRUE
S100A10	non-TF	5.76899e-10	-1.16232	0.739	0.973	8.74579e-06	TRUE
TMSB4X	non-TF	7.79422e-10	-1.04157	0.67	0.946	1.1816e-05
CST3	non-TF	1.53202e-09	0.829174	0.989	0.973	2.32254e-05	TRUE
PRDX1	non-TF	2.06232e-09	0.870329	0.966	1	3.12648e-05	TRUE
S100A1	non-TF	2.63693e-09	0.563169	0.989	0.973	3.99758e-05
AGR2	non-TF	1.07315e-08	1.32204	0.88	0.649	0.00016269
OTOG	non-TF	1.53749e-08	1.14409	0.892	0.73	0.000233084
SLC34A2	non-TF	3.11584e-08	-1.3936	0.053	0.27	0.000472361	TRUE
TMSB10	non-TF	3.60344e-08	-1.1311	0.337	0.703	0.000546281	TRUE
SLC35F1	non-TF	4.33837e-07	-0.533453	0.015	0.135	0.00657697
MT-CO3	non-TF	6.77272e-07	0.571622	0.999	1	0.0102674
EPCAM	non-TF	1.21962e-06	-0.906459	0.673	0.919	0.0184894	TRUE
ATF3	TF	1.41689e-06	-0.581467	0.011	0.108	0.0214801	TRUE
ANXA2	non-TF	2.68313e-06	-0.713825	0.66	0.919	0.0406762	TRUE
CLU	non-TF	2.71207e-06	-1.10992	0.566	0.784	0.041115	TRUE
MT-ATP6	non-TF	3.4124e-06	0.502788	0.999	1	0.0517319
LMNA	non-TF	3.8024e-06	-0.93958	0.096	0.324	0.0576444	TRUE
UBE2H	non-TF	4.43902e-06	-1.07532	0.184	0.459	0.0672955
ANGPTL7	non-TF	4.68614e-06	-0.78826	0.037	0.189	0.0710419
PALLD	non-TF	4.88829e-06	-1.27606	0.191	0.459	0.0741065
CAP2	non-TF	4.95525e-06	-0.747154	0.019	0.135	0.0751215
TIMP3	non-TF	4.96209e-06	-1.07894	0.058	0.243	0.0752254
HHATL	non-TF	5.10989e-06	1.75228	0.382	0	0.0774659
FAM200B	non-TF	6.90042e-06	-1.14957	0.338	0.622	0.10461
TPGS2	non-TF	7.59066e-06	-0.838308	0.369	0.676	0.115074
HSPA5	non-TF	7.81506e-06	1.1522	0.8	0.514	0.118476	TRUE
AKR1A1	non-TF	8.40878e-06	1.213	0.699	0.405	0.127477	TRUE
INAVA	non-TF	9.55743e-06	-0.683447	0.013	0.108	0.144891
MGAT3	non-TF	1.00422e-05	-0.660239	0.038	0.189	0.15224
PPP2R2B	non-TF	1.13427e-05	1.24015	0.616	0.216	0.171955
TUBA1B	non-TF	1.2291e-05	1.45425	0.549	0.189	0.186331	TRUE
JUND	TF	1.38693e-05	-0.755409	0.573	0.838	0.210258	TRUE
WLS	non-TF	1.78116e-05	-0.807814	0.134	0.378	0.270024
MT-CYB	non-TF	1.87576e-05	0.472272	0.996	1	0.284366
KRT8	non-TF	1.9296e-05	-0.983584	0.442	0.703	0.292528
ASNS	non-TF	1.94009e-05	-0.510979	0.039	0.189	0.294117	TRUE
RPLP1	non-TF	1.97855e-05	-0.35076	0.988	0.973	0.299948
CSRP2	non-TF	2.27321e-05	-0.867545	0.662	0.838	0.344619
FTH1	non-TF	2.30327e-05	-0.486639	0.995	1	0.349176	TRUE
TUBA4A	non-TF	2.39386e-05	-0.673905	0.014	0.108	0.362909	TRUE
HES4	TF	2.64314e-05	-0.968701	0.109	0.324	0.4007
DHRS7	non-TF	2.85304e-05	1.10134	0.72	0.405	0.432521
SOX4	TF	2.8859e-05	-1.20262	0.395	0.649	0.437503
MACC1	non-TF	2.96629e-05	-0.357993	0.014	0.108	0.44969
RPS27A	non-TF	3.19506e-05	-0.392226	0.954	1	0.484371
KRT18	non-TF	3.24174e-05	-0.728194	0.775	0.919	0.491448	TRUE
CD151	non-TF	3.24629e-05	-0.831385	0.095	0.297	0.492138
SVIP	non-TF	3.50607e-05	1.14465	0.702	0.486	0.53152
MYL6	non-TF	4.30193e-05	-0.705125	0.751	0.892	0.652173
RPL28	non-TF	5.29855e-05	-0.523885	0.866	0.973	0.803261
MT-ND3	non-TF	6.1085e-05	0.518812	0.995	1	0.926049	TRUE
COL2A1	non-TF	8.30863e-05	1.40961	0.372	0.054	1	TRUE
ENHO	non-TF	9.42346e-05	1.17638	0.54	0.216	1
HEPN1	non-TF	0.000529819	1.12412	0.253	0	1
TSPAN8	non-TF	0.000659605	1.10388	0.498	0.216	1
STMN1	non-TF	8.19239e-05	1.09817	0.624	0.27	1	TRUE
CCDC80	non-TF	0.00107392	1.08346	0.412	0.135	1
AIF1L	non-TF	0.000855379	1.07456	0.536	0.27	1
IRX3	TF	0.00186892	1.06752	0.287	0.054	1
DTNB	non-TF	0.00265599	1.05931	0.2	0	1
KREMEN1	non-TF	0.00242934	1.05837	0.431	0.189	1
KCNJ16	non-TF	0.00168221	1.05632	0.254	0.027	1
AGR3	non-TF	0.000230838	1.0283	0.587	0.243	1
TCF7	TF	0.00828409	1.02362	0.657	0.541	1
GLUL	non-TF	0.00273453	1.017	0.472	0.243	1
TMEM205	non-TF	0.000635582	0.980897	0.642	0.459	1
ECHDC2	non-TF	0.0020143	0.968024	0.249	0.027	1
FOSB	TF	0.000905446	0.964736	0.527	0.243	1
CNBP	TF	0.00733452	0.955785	0.439	0.243	1
STOML2	non-TF	0.00125057	0.942854	0.225	0	1
FAM174B	non-TF	0.00284744	0.932817	0.284	0.054	1
TXN2	non-TF	0.00647877	0.913691	0.316	0.108	1	TRUE
PDIA6	non-TF	0.00232811	0.908231	0.59	0.378	1
SIX1	TF	0.00730503	0.899745	0.351	0.135	1
CRELD2	non-TF	0.00444656	0.888573	0.3	0.081	1
CRIP2	non-TF	0.00420827	0.885281	0.229	0.027	1
LINC01549	non-TF	0.00383027	0.866885	0.457	0.216	1
ALDH1A1	non-TF	0.00307525	0.857044	0.54	0.27	1	TRUE
TWF1	non-TF	0.00311506	0.852199	0.656	0.486	1
MT-ND6	non-TF	0.00173349	0.849689	0.754	0.595	1	TRUE
XPA	TF	0.00867364	0.837291	0.408	0.189	1	TRUE
NOSIP	non-TF	0.00595056	0.832514	0.215	0.027	1
COL11A2	non-TF	0.00322958	0.820635	0.486	0.216	1	TRUE
BEX5	non-TF	0.00485429	0.81745	0.302	0.081	1
ROMO1	non-TF	0.00534927	0.817233	0.556	0.324	1
PDIA3	non-TF	0.00302867	0.810815	0.693	0.514	1
FAM213A	non-TF	0.00170982	0.806832	0.682	0.541	1
XBP1	TF	0.00875055	0.794846	0.281	0.081	1	TRUE
PAQR6	non-TF	0.000153737	0.791591	0.829	0.622	1
SCRG1	non-TF	0.00334248	0.790208	0.399	0.135	1
ATP1B1	non-TF	0.00592421	0.777777	0.629	0.459	1	TRUE
SEC11C	non-TF	0.00183948	0.773913	0.667	0.459	1
SRRM4	non-TF	0.00440693	0.768427	0.276	0.054	1
UQCR10	non-TF	0.00514208	0.755517	0.632	0.514	1	TRUE
KIF5C	non-TF	0.00564587	0.75241	0.353	0.108	1
MINDY3	non-TF	0.00769377	0.750556	0.164	0	1
NUDT14	non-TF	0.00512978	0.750302	0.178	0	1
PSMG3	non-TF	0.00882364	0.735117	0.244	0.054	1
HABP4	non-TF	0.00553594	0.732058	0.371	0.135	1
CADM1	non-TF	0.00955803	0.729375	0.414	0.189	1
VEGFB	non-TF	0.00465327	0.709165	0.412	0.162	1	TRUE
EPN2	non-TF	0.00718586	0.706981	0.365	0.135	1
PRPF31	non-TF	0.00908938	0.702074	0.158	0	1	TRUE
COL21A1	non-TF	0.00971275	0.698443	0.155	0	1
DTNBP1	non-TF	0.00672707	0.677792	0.168	0	1	TRUE
BCAP31	non-TF	0.00903611	0.675365	0.491	0.27	1
SPCS1	non-TF	0.00213636	0.672967	0.744	0.676	1
SNORC	non-TF	0.00645361	0.672442	0.782	0.757	1
SPCS2	non-TF	0.00128192	0.667097	0.783	0.703	1
SON	TF	0.00120847	0.657179	0.771	0.757	1
TRDN	non-TF	0.00796648	0.630959	0.214	0.027	1
ZBTB20	TF	0.00353556	0.609506	0.851	0.757	1
SPARCL1	non-TF	0.000871845	0.59624	0.918	0.865	1
FXYD3	non-TF	0.00437639	0.546477	0.852	0.811	1
PTN	non-TF	0.00459958	0.545009	0.89	0.919	1
S100A13	non-TF	0.000110689	0.465437	0.972	1	1
SRP14	non-TF	0.000892367	0.456254	0.935	0.946	1
MT-ND5	non-TF	0.00537315	0.41447	0.972	0.973	1	TRUE
UBB	non-TF	0.00634048	0.375755	0.96	0.973	1
MT-CO2	non-TF	0.0016025	0.341156	0.999	1	1	TRUE
MT-ND4	non-TF	0.00214623	0.336697	1	1	1	TRUE
B2M	non-TF	0.0020542	0.325582	0.919	0.892	1	TRUE
CD63	non-TF	0.00726211	0.291394	0.881	0.865	1	TRUE
RPS27	non-TF	0.00967717	-0.294069	0.896	0.973	1
RPL19	non-TF	0.00498582	-0.305309	0.93	1	1
CCNO	non-TF	0.0063589	-0.30647	0.028	0.108	1
PAM	non-TF	0.00377931	-0.314465	0.026	0.108	1
STOX2	non-TF	0.000958746	-0.318172	0.021	0.108	1
RPS13	non-TF	0.000246073	-0.320057	0.97	1	1
CTSC	non-TF	0.00874515	-0.321657	0.03	0.108	1	TRUE
RPS24	non-TF	0.00173524	-0.327374	0.95	1	1
SPTBN5	non-TF	0.00858204	-0.341339	0.03	0.108	1
RPL26	non-TF	0.000224115	-0.350119	0.961	1	1
UQCRH	non-TF	0.0091964	-0.351022	0.629	0.838	1
SERAC1	non-TF	0.000382702	-0.377917	0.019	0.108	1
RPL13	non-TF	0.000621488	-0.385844	0.906	0.973	1	TRUE
GRHL2	TF	0.000360964	-0.390577	0.019	0.108	1
USP9X	non-TF	0.00492746	-0.403465	0.053	0.162	1
RNF111	non-TF	0.00351668	-0.406123	0.026	0.108	1
MYOF	non-TF	0.000583053	-0.406501	0.02	0.108	1
RPUSD4	non-TF	0.000811661	-0.413152	0.021	0.108	1
CLCN5	non-TF	0.000114243	-0.417238	0.017	0.108	1
FADS3	non-TF	0.00176047	-0.419164	0.024	0.108	1
PPP4R3A	non-TF	0.00436886	-0.424833	0.039	0.135	1
MBNL2	non-TF	0.00702482	-0.425059	0.056	0.162	1
SCYL2	non-TF	0.00193641	-0.425492	0.024	0.108	1
NFKBIA	non-TF	0.00558371	-0.426296	0.547	0.757	1	TRUE
ZYX	non-TF	0.00359365	-0.433001	0.051	0.162	1
DHX16	non-TF	0.008007	-0.442564	0.03	0.108	1
FAM50B	non-TF	0.00901544	-0.443039	0.058	0.162	1
PACRG	non-TF	0.000878507	-0.445604	0.021	0.108	1
H2AFZ	non-TF	0.00950897	-0.459372	0.48	0.649	1
DYNLRB1	non-TF	0.00898462	-0.462792	0.351	0.541	1
GSN	non-TF	0.000854367	-0.463986	0.769	1	1
NIN	non-TF	0.000692122	-0.468223	0.043	0.162	1
EIF1	non-TF	0.000563442	-0.468592	0.921	1	1
NDUFAF2	non-TF	0.00769688	-0.468825	0.091	0.216	1	TRUE
CDON	non-TF	0.00128875	-0.469557	0.023	0.108	1
UNC119B	non-TF	0.00453995	-0.471595	0.027	0.108	1
PWAR6	non-TF	0.00163951	-0.474657	0.034	0.135	1
ACTB	non-TF	0.00478824	-0.478736	0.737	0.892	1	TRUE
FUCA2	non-TF	0.00339781	-0.484956	0.051	0.162	1
KMT5C	non-TF	0.00010574	-0.485632	0.017	0.108	1	TRUE
MYH9	non-TF	0.000678686	-0.486763	0.043	0.162	1
CARNS1	non-TF	0.0011656	-0.497005	0.023	0.108	1
ANXA3	non-TF	0.0084114	-0.49736	0.058	0.162	1
CAMTA2	TF	0.00622886	-0.498159	0.042	0.135	1
FAM107A	non-TF	0.00335316	-0.499044	0.855	1	1
LDLRAP1	non-TF	0.000925869	-0.501304	0.021	0.108	1
PRRG4	non-TF	0.00166197	-0.503023	0.047	0.162	1
PGLS	non-TF	0.0072416	-0.515419	0.273	0.459	1
LAMTOR2	non-TF	0.00112262	-0.51587	0.298	0.541	1
CCNI	non-TF	0.00350494	-0.515949	0.703	0.865	1
AC234582.1	non-TF	0.00549491	-0.51813	0.028	0.108	1
ATF1	TF	0.00293007	-0.518656	0.051	0.162	1
RNF145	non-TF	0.00972197	-0.520492	0.171	0.324	1
ROCK1	non-TF	0.00188925	-0.523201	0.047	0.162	1	TRUE
SFXN5	non-TF	0.000333773	-0.528614	0.019	0.108	1
SRGAP2C	non-TF	0.00328179	-0.53861	0.038	0.135	1
RPL23	non-TF	0.000584635	-0.540049	0.839	0.946	1
FAM210A	non-TF	0.00249452	-0.546048	0.025	0.108	1
ATP5MD	non-TF	0.00755492	-0.547608	0.496	0.649	1
KLF6	TF	0.00169796	-0.549459	0.109	0.27	1
TMEM109	non-TF	0.00183191	-0.552512	0.024	0.108	1
TUBB2B	non-TF	0.00261218	-0.554007	0.433	0.649	1	TRUE
NSMCE2	non-TF	0.00237763	-0.557781	0.05	0.162	1
RAC1	non-TF	0.0037871	-0.562444	0.518	0.676	1	TRUE
ADO	non-TF	8.3736e-05	-0.562677	0.025	0.135	1	TRUE
ETFBKMT	non-TF	0.00349135	-0.563696	0.026	0.108	1
CCND3	non-TF	0.00167812	-0.567394	0.024	0.108	1	TRUE
FZD7	non-TF	0.00424439	-0.57893	0.121	0.27	1	TRUE
LTBP4	non-TF	0.00484866	-0.582524	0.04	0.135	1
FAM161A	non-TF	0.0026274	-0.586897	0.05	0.162	1
FSTL1	non-TF	8.61231e-05	-0.587327	0.025	0.135	1
TIMM10B	non-TF	0.00567168	-0.590141	0.056	0.162	1
EMC10	non-TF	0.00199836	-0.590647	0.211	0.405	1
HYAL2	non-TF	0.00720815	-0.592553	0.058	0.162	1	TRUE
NFAT5	TF	0.00181669	-0.593083	0.062	0.189	1
CTGF	non-TF	0.001445	-0.595928	0.046	0.162	1
LSAMP	non-TF	0.00820445	-0.600396	0.075	0.189	1
TM2D1	non-TF	0.00126014	-0.603224	0.367	0.595	1
EEF1B2	non-TF	0.00321577	-0.608318	0.483	0.676	1
MTOR	non-TF	0.000160432	-0.616806	0.037	0.162	1	TRUE
PRSS23	non-TF	0.00641602	-0.622588	0.622	0.811	1
FAM13B	non-TF	0.000756237	-0.622798	0.021	0.108	1
DYNLL1	non-TF	0.00139704	-0.623448	0.607	0.784	1
TMEM221	non-TF	0.000353273	-0.625711	0.079	0.243	1
ZNF106	non-TF	0.00708164	-0.628444	0.168	0.324	1
CNOT2	non-TF	0.00835908	-0.634428	0.133	0.27	1
TCTEX1D2	non-TF	0.00842727	-0.63924	0.254	0.405	1
RPL12	non-TF	0.00103902	-0.639505	0.902	1	1
TM4SF18	non-TF	0.00615366	-0.639528	0.186	0.351	1
AMD1	non-TF	0.00502324	-0.643739	0.267	0.459	1	TRUE
ARID5B	TF	0.00336476	-0.645769	0.101	0.243	1	TRUE
MAP1LC3A	non-TF	0.00790878	-0.648444	0.13	0.27	1
PPP1R12A	non-TF	0.00342113	-0.652535	0.139	0.297	1
SOGA1	non-TF	0.00118534	-0.659374	0.023	0.108	1
PPP1R15A	non-TF	0.00360716	-0.661807	0.068	0.189	1
COL9A1	non-TF	0.0018455	-0.662017	0.063	0.189	1
CDC26	non-TF	0.00306933	-0.662448	0.248	0.432	1
MYL12A	non-TF	0.00603431	-0.663829	0.344	0.514	1
PSMB7	non-TF	0.00687416	-0.665508	0.304	0.486	1	TRUE
FUBP3	non-TF	0.000849929	-0.669024	0.057	0.189	1
NCK2	non-TF	0.00239234	-0.671964	0.037	0.135	1
FYTTD1	non-TF	0.00244739	-0.672529	0.133	0.297	1
UBC	non-TF	0.000370283	-0.672696	0.539	0.784	1	TRUE
CNN3	non-TF	0.000468789	-0.673432	0.558	0.784	1
NES	non-TF	0.00365578	-0.677964	0.052	0.162	1
CHCHD1	non-TF	0.000579002	-0.684116	0.174	0.378	1
MLLT1	non-TF	0.00481931	-0.684849	0.07	0.189	1
TPM1	non-TF	0.00470228	-0.69276	0.186	0.351	1
PLCE1	non-TF	0.000676785	-0.693014	0.1	0.27	1	TRUE
GADD45A	non-TF	0.00859424	-0.696089	0.076	0.189	1	TRUE
PDLIM4	non-TF	0.00917852	-0.697365	0.155	0.297	1
TMEM238	non-TF	0.00490922	-0.705281	0.339	0.514	1
SLC38A1	non-TF	0.00543287	-0.708023	0.146	0.297	1	TRUE
RPS2	non-TF	6.7417e-05	-0.710993	0.743	0.946	1	TRUE
ABHD2	non-TF	0.000754493	-0.712877	0.12	0.297	1
APP	non-TF	0.00414557	-0.71646	0.206	0.378	1	TRUE
RNF216	non-TF	0.00231567	-0.716469	0.116	0.27	1
AZIN1	non-TF	0.00225993	-0.71859	0.097	0.243	1
IDH3G	non-TF	0.000898571	-0.719101	0.123	0.297	1
LYPLAL1	non-TF	0.00249079	-0.719124	0.197	0.378	1
IFT74	non-TF	0.000528283	-0.727703	0.1	0.27	1
CCDC66	non-TF	0.00326906	-0.735196	0.159	0.324	1
MPDZ	non-TF	0.00847182	-0.740998	0.112	0.243	1
RAP1B	non-TF	0.00805889	-0.744974	0.176	0.324	1
CD47	non-TF	0.00442312	-0.761633	0.142	0.297	1	TRUE
AKAP12	non-TF	0.000274728	-0.762094	0.365	0.622	1
DDAH2	non-TF	0.00359762	-0.763388	0.304	0.486	1
CTNNA1	non-TF	0.000137864	-0.767784	0.451	0.676	1
ARF3	non-TF	0.00472012	-0.785773	0.127	0.27	1
FIBP	non-TF	0.000213616	-0.785833	0.196	0.432	1
HMOX2	non-TF	0.000198948	-0.788268	0.125	0.324	1	TRUE
CAVIN1	non-TF	0.00284436	-0.801346	0.159	0.324	1
IFNAR1	non-TF	0.00220022	-0.804948	0.112	0.27	1	TRUE
PPIC	non-TF	0.000222822	-0.813145	0.112	0.297	1
PBX1	TF	8.63879e-05	-0.824079	0.273	0.541	1
TNRC6A	non-TF	0.000272165	-0.852857	0.164	0.378	1	TRUE
S100A2	non-TF	0.0030406	-0.872463	0.026	0.108	1	TRUE
GAN	non-TF	0.00255547	-0.909479	0.083	0.216	1
KRT19	non-TF	0.000334216	-0.91195	0.497	0.703	1	TRUE
ERF	TF	0.00352308	-0.918992	0.123	0.27	1
C2orf40	non-TF	8.30473e-05	-0.923738	0.219	0.459	1
REXO2	non-TF	0.000567412	-0.924074	0.157	0.351	1
HSPB1	non-TF	0.00380019	-0.925151	0.338	0.486	1	TRUE
ARSD	non-TF	8.84392e-05	-0.934302	0.059	0.216	1
ANXA11	non-TF	0.000412965	-0.980313	0.14	0.324	1
TAGLN2	non-TF	0.000144752	-0.986353	0.062	0.216	1
LGALS1	non-TF	0.000473848	-1.02748	0.101	0.27	1	TRUE
PLAT	non-TF	0.000351079	-1.06145	0.083	0.243	1	TRUE
FBXO32	non-TF	0.00697934	-1.13604	0.183	0.324	1
EMP3	non-TF	0.000402957	-1.33488	0.102	0.27	1
FRZB	non-TF	0.00783195	-1.40229	0.181	0.324	1
CXCL14	non-TF	0.000239891	-1.73231	0.208	0.432	1
